# Supplementary material for: Microbial Polysaccharides Extracted from Different Mature Muds of the Euganean Thermal District Show Similar Anti-Inflammatory Activity In Vivo
Source: Int J Mol Sci. 2024 May 3;25(9):4999. doi: 10.3390/ijms25094999 (PMC11084611; doi:10.3390/ijms25094999)
Supplement: Supplementary file 1 [file ijms-25-04999-s001.zip › Caichiolo-2024_supplementary Table S1.xlsx]

## Sheet: Samples names
Sample Name	Raw data name	Raw reads name (FW-RV)
P-1 replicate 1	A66	A66_S87_R1_001.fastq	A66_S87_R2_001.fastq
P-1 replicate 2	A67	A67_S88_R1_001.fastq	A67_S88_R2_001.fastq
P-4 replicate 1	A68	A68_S89_R1_001.fastq	A68_S89_R2_001.fastq
P-4 replicate 2	A69	A69_S90_R1_001.fastq	A69_S90_R2_001.fastq
P-2 replicate 1	A70	A70_S91_R1_001.fastq	A70_S91_R2_001.fastq
P-2 replicate 2	A71	A71_S92_R1_001.fastq	A71_S92_R2_001.fastq
P-5 replicate 1	A72	A72_S93_R1_001.fastq	A72_S93_R2_001.fastq
P-5 replicate 2	A73	A73_S94_R1_001.fastq	A73_S94_R2_001.fastq
P-6 replicate 1	A74	A74_S95_R1_001.fastq	A74_S95_R2_001.fastq
P-6 replicate 2	A75	A75_S96_R1_001.fastq	A75_S96_R2_001.fastq
P-3 replicate 1	A76	A76_S97_R1_001.fastq	A76_S97_R2_001.fastq
P-3 replicate 2	A77	A77_S98_R1_001.fastq	A77_S98_R2_001.fastq
The raw reads were deposited in the sequence read archive database (SRA) of NCBI under the BioProject PRJNA624369.

## Sheet: All ASVs
	dada2							raw reads												Relative Abundance													1	2	3	4	5	6	7	8	9	10	11	12		1	2	3	4
	Domain	Phylum	Class	Order	Family	Genus	ASVs	A66	A67	A68	A69	A70	A71	A72	A73	A74	A75	A76	A77	A66	A67	A68	A69	A70	A71	A72	A73	A74	A75	A76	A77	AVG	A66	A67	A68	A69	A70	A71	A72	A73	A74	A75	A76	A77	>0.01%	A66	A67	A68	A69
1	Bacteria	Proteobacteria	Gammaproteobacteria	Acidiferrobacterales	Acidiferrobacteraceae	Sulfurifustis	ASV_ 10	11628	8457	2265	1488	346	186	14136	22179	4376	5361	14059	11155	0.0544823	0.0484021	0.00723252	0.00578039	0.0013573	0.000726477	0.0454385	0.0605353	0.0139114	0.0179298	0.0382226	0.02994	0.0269966	1	1	1	1	1	1	1	1	1	1	1	1	4	1	1	1	1
2	Bacteria	Proteobacteria	Alphaproteobacteria	Rhodobacterales	Rhodobacteraceae	Limibaculum	ASV_ 16	5681	2815	2717	1550	3218	3184	4873	5306	4177	5505	6050	3706	0.026618	0.0161111	0.00867583	0.00602124	0.0126237	0.012436	0.0156637	0.0144822	0.0132788	0.0184114	0.0164483	0.00994691	0.0142264	1	1	1	1	1	1	1	1	1	1	1	1	4	1	1	1	1
3	Bacteria	Acidobacteriota	Subgroup 21	NA	NA	NA	ASV_ 24	1643	1079	3623	2656	999	418	3068	3168	3973	3726	6703	5026	0.00769818	0.00617545	0.0115688	0.0103177	0.00391892	0.00163262	0.00986172	0.00864674	0.0126303	0.0124615	0.0182236	0.0134898	0.00971878	1	1	1	1	1	1	1	1	1	1	1	1	4	1	1	1	1
4	Bacteria	Acidobacteriota	Aminicenantia	Aminicenantales	NA	NA	ASV_ 26	2408	1640	6718	4882	3647	3635	1672	2416	2808	2858	1555	1995	0.0112825	0.00938623	0.0214517	0.018965	0.0143066	0.0141976	0.00537444	0.00659423	0.0089267	0.00955853	0.00422762	0.00535458	0.0108021	1	1	1	1	1	1	1	1	1	1	1	1	4	1	1	1	1
5	Bacteria	Proteobacteria	Gammaproteobacteria	Burkholderiales	Hydrogenophilaceae	Thiobacter	ASV_ 4	5302	4913	12627	9960	25614	19699	1008	1678	18053	16822	8794	8027	0.0248422	0.0281186	0.0403201	0.0386913	0.10048	0.0769402	0.00324009	0.00457993	0.0573909	0.0562609	0.0239085	0.0215445	0.0396931	1	1	1	1	1	1	1	1	1	1	1	1	4	1	1	1	1
6	Bacteria	Acetothermia	Acetothermiia	NA	NA	NA	ASV_ 51	1480	900	3392	2808	3869	4229	628	970	2492	3402	1755	974	0.00693446	0.00515098	0.0108312	0.0109082	0.0151775	0.0165176	0.00201863	0.00264752	0.00792213	0.0113779	0.00477137	0.00261422	0.00807264	1	1	1	1	1	1	1	1	1	1	1	1	4	1	1	1	1
7	Bacteria	Chloroflexi	Anaerolineae	Anaerolineales	Anaerolineaceae	NA	ASV_ 80	1210	1079	3568	2648	0	0	273	364	815	883	698	735	0.00566939	0.00617545	0.0113932	0.0102866	0	0	0.000877526	0.000993501	0.0025909	0.00295318	0.00189767	0.00197274	0.00373418	1	1	1	1	0	0	1	1	1	1	1	1	4	1	1	1	1
8	Bacteria	Chloroflexi	Anaerolineae	Anaerolineales	Anaerolineaceae	NA	ASV_ 22	1122	660	5403	4009	2218	1397	599	900	2752	2681	2019	1937	0.00525707	0.00377739	0.0172527	0.0155736	0.00870087	0.00545639	0.00192541	0.00245646	0.00874867	0.00896656	0.00548911	0.00519891	0.00740026	1	1	1	1	1	1	1	1	1	1	1	1	4	1	0	1	1
9	Archaea	Crenarchaeota	Bathyarchaeia	NA	NA	NA	ASV_ 35	1510	1145	1517	1387	1346	1569	750	1361	3669	3076	2103	2356	0.00707502	0.00655319	0.00484403	0.00538804	0.00528015	0.00612819	0.00241078	0.00371471	0.0116638	0.0102876	0.00571749	0.00632351	0.00628221	1	1	1	1	1	1	1	1	1	1	1	1	4	1	1	0	1
10	Bacteria	Desulfobacterota	Syntrophobacteria	Syntrophobacterales	Syntrophobacteraceae	Desulfosoma	ASV_ 11	621	452	8848	7613	4144	4060	0	0	2097	2452	643	636	0.00290966	0.00258694	0.0282531	0.029574	0.0162563	0.0158575	0	0	0.00666641	0.00820067	0.00174814	0.00170703	0.00947998	1	1	1	1	1	1	0	0	1	1	1	1	4	0	0	1	1
11	Archaea	Crenarchaeota	Nitrososphaeria	Nitrosocaldales	Nitrosocaldaceae	NA	ASV_ 127	37	27	2434	1433	22	0	122	94	51	44	188	189	0.000173361	0.000154529	0.00777216	0.00556673	8.63026e-05	0	0.000392154	0.000256564	0.00016213	0.000147157	0.000511121	0.000507276	0.00131079	1	1	1	1	0	0	1	1	1	1	1	1	4	0	0	1	1
12	Bacteria	Proteobacteria	Gammaproteobacteria	Burkholderiales	Hydrogenophilaceae	Thiobacter	ASV_ 128	169	87	4098	3374	942	1377	312	450	264	266	32	10	0.00079184	0.000497928	0.0130856	0.0131069	0.00369532	0.00537828	0.00100289	0.00122823	0.000839262	0.000889632	8.69993e-05	2.684e-05	0.00338581	1	1	1	1	1	1	1	1	1	1	0	0	4	0	0	1	1
13	Archaea	Crenarchaeota	Bathyarchaeia	NA	NA	NA	ASV_ 14	1820	1833	1221	998	2424	2096	121	160	1926	1697	1255	1720	0.00852751	0.0104908	0.00389885	0.0038769	0.00950898	0.00818654	0.00038894	0.000436704	0.0061228	0.00567559	0.003412	0.00461648	0.00542851	1	1	1	1	1	1	1	1	1	1	1	1	4	1	1	0	0
14	Bacteria	Proteobacteria	Gammaproteobacteria	Ectothiorhodospirales	Thioalkalispiraceae	Thioalkalispira-Sulfurivermis	ASV_ 140	562	492	3052	2897	939	491	0	0	192	169	440	385	0.00263322	0.00281587	0.00974554	0.0112539	0.00368355	0.00191774	0	0	0.000610373	0.000565217	0.00119624	0.00103334	0.00295458	1	1	1	1	1	1	0	0	1	1	1	1	4	0	0	1	1
15	Bacteria	Bacteroidota	Ignavibacteria	Ignavibacteriales	Ignavibacteriaceae	Ignavibacterium	ASV_ 17	142	161	7377	6265	1176	1655	240	300	2581	2736	910	2033	0.000665333	0.000921453	0.023556	0.0243375	0.00461327	0.00646409	0.000771451	0.00081882	0.00820506	0.0091505	0.00247404	0.00545658	0.00728617	1	1	1	1	1	1	1	1	1	1	1	1	4	0	0	1	1
16	Bacteria	Verrucomicrobiota	Verrucomicrobiae	Pedosphaerales	Pedosphaeraceae	NA	ASV_ 188	184	206	1783	1847	652	1613	0	0	293	309	91	84	0.000862121	0.001179	0.00569341	0.00717499	0.0025577	0.00630004	0	0	0.000931454	0.00103344	0.000247404	0.000225456	0.00218375	1	1	1	1	1	1	0	0	1	1	1	1	4	0	0	1	1
17	Archaea	Thermoplasmatota	Thermoplasmata	JdFR-43	NA	NA	ASV_ 19	3135	3356	824	917	1803	3704	944	1733	7909	5348	2498	4834	0.0146889	0.0192074	0.00263117	0.00356224	0.00707289	0.0144671	0.00303437	0.00473005	0.0251429	0.0178863	0.00679138	0.0129745	0.0110158	1	1	1	1	1	1	1	1	1	1	1	1	4	1	1	0	0
18	Bacteria	Cyanobacteria	Cyanobacteria	Cyanobacteriales	Oscillatoriaceae	Phormidium ETS-05	ASV_ 2	398	424	1942	2058	23276	37388	289	462	70	33	9922	12907	0.00186481	0.00242668	0.00620112	0.00799465	0.0913082	0.14603	0.000928956	0.00126098	0.000222532	0.000110368	0.0269752	0.0346424	0.0266638	1	1	1	1	1	1	1	1	1	1	1	1	4	0	0	1	1
19	Bacteria	Chloroflexi	Anaerolineae	SBR1031	NA	NA	ASV_ 229	33	36	3001	2568	280	587	0	0	132	94	0	0	0.00015462	0.000206039	0.00958269	0.00997584	0.0010984	0.0022927	0	0	0.000419631	0.000314381	0	0	0.00200369	1	1	1	1	1	1	0	0	1	1	0	0	4	0	0	1	1
20	Bacteria	Nitrospirota	Thermodesulfovibrionia	NA	NA	NA	ASV_ 258	27	36	1811	1463	15	26	0	16	233	227	70	157	0.000126507	0.000206039	0.00578282	0.00568327	5.88427e-05	0.000101551	0	4.36704e-05	0.000740712	0.000759197	0.000190311	0.000421388	0.00117619	1	1	1	1	0	1	0	0	1	1	1	1	4	0	0	1	1
21	Bacteria	Chloroflexi	Anaerolineae	SBR1031	NA	NA	ASV_ 3	490	280	7277	5427	2271	1617	960	1427	4173	5605	4354	2937	0.00229587	0.00160253	0.0232367	0.0210821	0.00890878	0.00631567	0.0030858	0.00389485	0.0132661	0.0187458	0.0118373	0.00788291	0.0101795	1	1	1	1	1	1	1	1	1	1	1	1	4	0	0	1	1
22	Archaea	Crenarchaeota	Bathyarchaeia	NA	NA	NA	ASV_ 33	549	278	1716	1386	171	59	267	360	107	65	147	85	0.00257231	0.00159108	0.00547947	0.00538416	0.000670807	0.000230442	0.000858239	0.000982584	0.000340156	0.000217391	0.000399653	0.00022814	0.00157954	1	1	1	1	1	1	1	1	1	1	1	1	4	0	0	1	1
23	Bacteria	Proteobacteria	Gammaproteobacteria	Burkholderiales	Gallionellaceae	NA	ASV_ 37	2693	2981	120	141	431	934	366	514	58	55	527	521	0.0126179	0.0170612	0.00038318	0.000547739	0.00169075	0.00364801	0.00117646	0.00140291	0.000184383	0.000183946	0.00143277	0.00139836	0.0034773	1	1	1	1	1	1	1	1	1	1	1	1	4	1	1	0	0
24	Bacteria	Acidobacteriota	Aminicenantia	Aminicenantales	NA	NA	ASV_ 38	521	449	5129	4207	1532	2267	46	81	225	238	159	221	0.00244112	0.00256977	0.0163777	0.0163428	0.0060098	0.00885443	0.000147861	0.000221081	0.00071528	0.000795987	0.000432278	0.000593164	0.00462511	1	1	1	1	1	1	1	1	1	1	1	1	4	0	0	1	1
25	Archaea	Crenarchaeota	Bathyarchaeia	NA	NA	NA	ASV_ 40	1285	1247	812	611	1152	1133	0	46	1132	970	718	1112	0.00602079	0.00713697	0.00259285	0.00237353	0.00451912	0.00442526	0	0.000125552	0.00359865	0.00324415	0.00195205	0.00298461	0.00324779	1	1	1	1	1	1	0	1	1	1	1	1	4	1	1	0	0
26	Archaea	Crenarchaeota	Bathyarchaeia	NA	NA	NA	ASV_ 42	2121	1688	623	448	1126	1316	1149	1747	3491	3606	2447	3063	0.00993782	0.00966095	0.00198934	0.00174033	0.00441712	0.00514002	0.00369332	0.00476826	0.011098	0.0120602	0.00665273	0.0082211	0.00661493	1	1	1	1	1	1	1	1	1	1	1	1	4	1	1	0	0
27	Archaea	Crenarchaeota	Bathyarchaeia	NA	NA	NA	ASV_ 43	3694	3546	404	388	1085	2120	345	635	3564	2660	1843	2709	0.017308	0.0202949	0.00129004	0.00150725	0.00425629	0.00828028	0.00110896	0.00173317	0.01133	0.00889632	0.00501062	0.00727096	0.00735723	1	1	1	1	1	1	1	1	1	1	1	1	4	1	1	0	0
28	Bacteria	Chloroflexi	Anaerolineae	Anaerolineales	Anaerolineaceae	NA	ASV_ 45	955	555	5019	3508	1505	914	788	859	909	1101	1565	1633	0.0044746	0.00317644	0.0160265	0.0136274	0.00590388	0.00356989	0.00253293	0.00234455	0.00288973	0.00368227	0.00425481	0.00438297	0.00557217	1	1	1	1	1	1	1	1	1	1	1	1	4	0	0	1	1
29	Bacteria	Nitrospirota	Thermodesulfovibrionia	NA	NA	NA	ASV_ 56	196	139	2049	1409	177	148	101	149	1635	1714	723	1263	0.000918347	0.00079554	0.00654279	0.0054735	0.000694344	0.000578057	0.000324652	0.00040668	0.0051977	0.00573244	0.00196564	0.00338989	0.0026683	1	1	1	1	1	1	1	1	1	1	1	1	4	0	0	1	1
30	Archaea	Crenarchaeota	Bathyarchaeia	NA	NA	NA	ASV_ 57	2706	2718	384	297	280	351	501	933	3827	3302	2023	2574	0.0126788	0.015556	0.00122618	0.00115375	0.0010984	0.00137093	0.0016104	0.00254653	0.0121661	0.0110435	0.00549999	0.00690862	0.0060716	1	1	1	1	1	1	1	1	1	1	1	1	4	1	1	0	0
31	Bacteria	Chloroflexi	Anaerolineae	MSB-5E12	NA	NA	ASV_ 60	868	520	5158	3535	1371	1122	205	220	1021	1003	1032	903	0.00406696	0.00297612	0.0164703	0.0137323	0.00537822	0.0043823	0.000658948	0.000600468	0.00324578	0.00335452	0.00280573	0.00242365	0.00500795	1	1	1	1	1	1	1	1	1	1	1	1	4	0	0	1	1
32	Bacteria	Chloroflexi	Anaerolineae	SBR1031	A4b	NA	ASV_ 62	854	525	4494	3339	1139	1355	0	17	1384	1734	1127	810	0.00400137	0.00300474	0.0143501	0.0129709	0.00446812	0.00529235	0	4.63998e-05	0.00439977	0.00579933	0.00306401	0.00217404	0.00496426	1	1	1	1	1	1	0	0	1	1	1	1	4	0	0	1	1
33	Bacteria	Acidobacteriota	Aminicenantia	Aminicenantales	NA	NA	ASV_ 67	1245	894	849	595	630	415	578	701	1802	2034	1071	1465	0.00583338	0.00511664	0.002711	0.00231138	0.00247139	0.0016209	0.00185791	0.00191331	0.0057286	0.00680268	0.00291176	0.00393206	0.00360092	1	1	1	1	1	1	1	1	1	1	1	1	4	1	1	0	0
34	Bacteria	Calditrichota	Calditrichia	Calditrichales	Calditrichaceae	Calorithrix	ASV_ 69	148	159	1978	1391	186	235	622	1047	1778	2062	1654	2623	0.000693446	0.000910007	0.00631608	0.00540358	0.000729649	0.000917861	0.00199934	0.00285768	0.0056523	0.00689632	0.00449678	0.00704014	0.00365943	1	1	1	1	1	1	1	1	1	1	1	1	4	0	0	1	1
35	Bacteria	Chloroflexi	Dehalococcoidia	GIF9	AB-539-J10	SCGC-AB-539-J10	ASV_ 70	1644	1247	494	399	867	1522	697	1061	3959	3534	1770	2112	0.00770287	0.00713697	0.00157742	0.00154998	0.00340111	0.00594462	0.00224042	0.00289589	0.0125858	0.0118194	0.00481215	0.00566861	0.00561127	1	1	1	1	1	1	1	1	1	1	1	1	4	1	1	0	0
36	Bacteria	Firmicutes	Symbiobacteriia	Symbiobacteriales	Symbiobacteraceae	NA	ASV_ 74	2008	1916	90	64	6143	4832	0	0	0	7	615	515	0.00940837	0.0109659	0.000287385	0.000248619	0.024098	0.0188728	0	0	0	2.34114e-05	0.00167202	0.00138226	0.0055799	1	1	1	1	1	1	0	0	0	0	1	1	4	1	1	0	0
37	Bacteria	Chloroflexi	Anaerolineae	SBR1031	NA	NA	ASV_ 77	359	197	2644	2191	1173	891	522	693	1449	1499	1073	860	0.00168207	0.00112749	0.00844273	0.00851132	0.0046015	0.00348006	0.00167791	0.00189147	0.00460641	0.00501338	0.0029172	0.00230824	0.00385498	1	1	1	1	1	1	1	1	1	1	1	1	4	0	0	1	1
38	Bacteria	Cyanobacteria	Cyanobacteria	Leptolyngbyales	Leptolyngbyaceae	Greenland-10	ASV_ 8	51	23	4274	4492	23	0	9951	6817	4688	3967	1463	993	0.000238958	0.000131636	0.0136476	0.0174499	9.02254e-05	0	0.0319863	0.0186063	0.0149033	0.0132676	0.0039775	0.00266521	0.00974704	1	1	1	1	0	0	1	1	1	1	1	1	4	0	0	1	1
39	Bacteria	Chloroflexi	Anaerolineae	Anaerolineales	Anaerolineaceae	Bellilinea	ASV_ 81	276	142	3711	2715	483	399	345	458	383	401	708	608	0.00129318	0.00081271	0.0118498	0.0105469	0.00189473	0.00155841	0.00110896	0.00125006	0.00121757	0.00134114	0.00192486	0.00163187	0.00303585	1	1	1	1	1	1	1	1	1	1	1	1	4	0	0	1	1
40	Bacteria	Bacteroidota	Bacteroidia	Bacteroidales	Bacteroidetes vadinHA17	NA	ASV_ 83	39	51	1745	1443	79	84	0	0	429	410	264	597	0.000182732	0.000291889	0.00557207	0.00560558	0.000309905	0.000328087	0	0	0.0013638	0.00137124	0.000717744	0.00160235	0.00144545	1	1	1	1	1	1	0	0	1	1	1	1	4	0	0	1	1
41	Archaea	Crenarchaeota	Bathyarchaeia	NA	NA	NA	ASV_ 87	1221	1075	115	101	122	122	1076	1633	3246	2878	2183	3088	0.00572093	0.00615256	0.000367214	0.000392352	0.000478587	0.000476507	0.00345867	0.00445711	0.0103191	0.00962542	0.00593498	0.0082882	0.0046393	1	1	1	1	1	1	1	1	1	1	1	1	4	1	1	0	0
42	Bacteria	Chloroflexi	Anaerolineae	KZNMV-5-B42	NA	NA	ASV_ 104	1558	732	708	516	1289	378	505	800	1010	1003	1032	785	0.00729992	0.00418946	0.00226076	0.00200449	0.00505655	0.00147639	0.00162326	0.00218352	0.00321081	0.00335452	0.00280573	0.00210694	0.00313103	1	1	1	1	1	1	1	1	1	1	1	1	4	1	0	0	0
43	Bacteria	Cyanobacteria	Cyanobacteria	Cyanobacteriales	Cyanobacteriaceae	Annamia HOs24	ASV_ 12	1062	1183	1227	1218	24758	36276	0	0	0	0	99	231	0.00497594	0.00677068	0.00391801	0.00473153	0.0971218	0.141687	0	0	0	0	0.000269154	0.000620004	0.0216745	1	1	1	1	1	1	0	0	0	0	1	1	4	0	1	0	0
44	Archaea	Crenarchaeota	Bathyarchaeia	NA	NA	NA	ASV_ 145	435	393	1419	1366	308	561	387	662	905	603	470	642	0.00203817	0.00224926	0.0045311	0.00530646	0.00120824	0.00219115	0.00124397	0.00180686	0.00287702	0.00201672	0.0012778	0.00172313	0.00237249	1	1	1	1	1	1	1	1	1	1	1	1	4	0	0	0	1
45	Bacteria	Desulfobacterota	Syntrophobacteria	Syntrophobacterales	Syntrophobacteraceae	Desulfosoma	ASV_ 203	106	104	1649	1118	152	138	0	0	216	273	0	59	0.000496657	0.000595224	0.00526553	0.00434306	0.000596273	0.000538999	0	0	0.000686669	0.000913043	0	0.000158356	0.00113282	1	1	1	1	1	1	0	0	1	1	0	1	4	0	0	1	0
46	Bacteria	Chloroflexi	Anaerolineae	Anaerolineales	Anaerolineaceae	NA	ASV_ 66	1071	440	898	545	82	31	5178	5290	1939	1791	2131	1800	0.00501811	0.00251826	0.00286746	0.00211715	0.000321673	0.00012108	0.0166441	0.0144385	0.00616413	0.00598997	0.00579361	0.0048312	0.00556877	1	1	1	1	1	1	1	1	1	1	1	1	4	1	0	0	0
47	Bacteria	Acidobacteriota	Acidobacteriae	Paludibaculum	NA	NA	ASV_ 86	347	360	1393	1586	840	1531	211	124	927	1114	498	361	0.00162585	0.00206039	0.00444808	0.00616109	0.00329519	0.00597977	0.000678234	0.000338445	0.00294695	0.00372575	0.00135393	0.000968925	0.00279855	1	1	1	1	1	1	1	1	1	1	1	1	4	0	0	0	1
48	Archaea	Crenarchaeota	Bathyarchaeia	NA	NA	NA	ASV_ 100	626	406	146	118	76	62	119	246	1273	1156	1109	1043	0.00293309	0.00232366	0.000466202	0.000458391	0.000298136	0.000242159	0.000382511	0.000671432	0.0040469	0.00386622	0.00301507	0.00279941	0.00179193	1	1	1	1	1	1	1	1	1	1	1	1	4	0	0	0	0
49	Bacteria	Chloroflexi	Anaerolineae	NA	NA	NA	ASV_ 1004	47	24	182	149	109	49	16	24	137	110	139	83	0.000220216	0.000137359	0.000581156	0.000578816	0.00042759	0.000191384	5.14301e-05	6.55056e-05	0.000435526	0.000367893	0.000377903	0.000222772	0.000304796	1	1	1	1	1	1	0	0	1	1	1	1	4	0	0	0	0
50	Bacteria	Planctomycetota	Planctomycetes	Pirellulales	Pirellulaceae	NA	ASV_ 1005	76	40	245	192	37	14	0	0	84	70	157	116	0.000356094	0.000228932	0.000782325	0.000745857	0.000145145	5.46811e-05	0	0	0.000267038	0.000234114	0.00042684	0.000311344	0.000296031	1	1	1	1	1	0	0	0	1	1	1	1	4	0	0	0	0
51	Archaea	Crenarchaeota	Bathyarchaeia	NA	NA	NA	ASV_ 1006	42	27	175	138	0	0	16	23	27	17	11	22	0.000196789	0.000154529	0.000558804	0.000536085	0	0	5.14301e-05	6.27762e-05	8.58336e-05	5.68562e-05	2.9906e-05	5.9048e-05	0.000149338	1	1	1	1	0	0	0	0	0	0	0	0	4	0	0	0	0
52	Bacteria	Proteobacteria	Gammaproteobacteria	Methylococcales	Methylohalobiaceae	Methylothermus	ASV_ 102	710	524	603	451	752	375	556	632	120	66	307	347	0.00332666	0.00299902	0.00192548	0.00175199	0.00294998	0.00146467	0.0017872	0.00172498	0.000381483	0.000220736	0.00083465	0.000931349	0.00169152	1	1	1	1	1	1	1	1	1	1	1	1	4	0	0	0	0
53	Bacteria	Sumerlaeota	Sumerlaeia	NA	NA	NA	ASV_ 1029	36	52	41	38	12	32	41	54	282	288	152	233	0.000168676	0.000297612	0.00013092	0.000147618	4.70741e-05	0.000124985	0.00013179	0.000147388	0.000896485	0.000963211	0.000413247	0.000625372	0.000341198	1	1	1	1	0	1	1	1	1	1	1	1	4	0	0	0	0
54	Bacteria	Bacteroidota	Bacteroidia	Cytophagales	Microscillaceae	NA	ASV_ 105	227	205	63	78	547	529	390	294	27	38	29	31	0.0010636	0.00117328	0.000201169	0.000303004	0.0021458	0.00206616	0.00125361	0.000802443	8.58336e-05	0.00012709	7.88431e-05	8.32041e-05	0.000782003	1	1	1	1	1	1	1	1	0	1	0	0	4	0	0	0	0
55	Bacteria	Zixibacteria	NA	NA	NA	NA	ASV_ 106	46	32	313	274	5	0	671	1098	371	416	785	1154	0.00021553	0.000183146	0.00099946	0.0010644	1.96142e-05	0	0.00215685	0.00299688	0.00117942	0.0013913	0.0021342	0.00309734	0.00128651	1	1	1	1	0	0	1	1	1	1	1	1	4	0	0	0	0
56	Bacteria	Chloroflexi	KD4-96	NA	NA	NA	ASV_ 1088	44	30	70	41	50	40	105	124	108	118	135	71	0.000206159	0.000171699	0.000223521	0.000159272	0.000196142	0.000156232	0.00033751	0.000338445	0.000343335	0.000394649	0.000367028	0.000190564	0.000257046	1	1	1	1	1	1	1	1	1	1	1	1	4	0	0	0	0
57	Bacteria	Chloroflexi	Anaerolineae	ADurb.Bin180	NA	NA	ASV_ 1102	42	21	227	189	44	51	18	48	122	121	65	78	0.000196789	0.00012019	0.000724848	0.000734203	0.000172605	0.000199195	5.78588e-05	0.000131011	0.000387841	0.000404682	0.000176717	0.000209352	0.000292941	1	1	1	1	1	1	0	1	1	1	1	1	4	0	0	0	0
58	Bacteria	Acetothermia	Acetothermiia	NA	NA	NA	ASV_ 111	355	279	64	60	1651	2700	0	0	0	0	7	0	0.00166333	0.0015968	0.000204363	0.00023308	0.00647662	0.0105456	0	0	0	0	1.90311e-05	0	0.00172824	1	1	1	1	1	1	0	0	0	0	0	0	4	0	0	0	0
59	Bacteria	Sva0485	NA	NA	NA	NA	ASV_ 112	301	374	128	89	295	462	596	890	1873	1551	774	1112	0.00141032	0.00214052	0.000408725	0.000345736	0.00115724	0.00180448	0.00191577	0.00242917	0.00595431	0.00518729	0.0021043	0.00298461	0.0023202	1	1	1	1	1	1	1	1	1	1	1	1	4	0	0	0	0
60	Bacteria	Spirochaetota	Spirochaetia	Spirochaetales	Spirochaetaceae	Spirochaeta	ASV_ 1121	25	20	124	94	29	46	0	0	0	0	0	0	0.000117136	0.000114466	0.000395952	0.000365159	0.000113763	0.000179666	0	0	0	0	0	0	0.000107179	1	1	1	1	1	1	0	0	0	0	0	0	4	0	0	0	0
61	Bacteria	Nitrospirota	Nitrospiria	Nitrospirales	Nitrospiraceae	Nitrospira	ASV_ 113	54	72	98	71	0	0	2105	1298	451	292	2517	2428	0.000253014	0.000412078	0.00031293	0.000275812	0	0	0.00676627	0.00354276	0.00143374	0.000976589	0.00684304	0.00651676	0.00227775	1	1	1	1	0	0	1	1	1	1	1	1	4	0	0	0	0
62	Bacteria	Chloroflexi	Chloroflexia	Thermomicrobiales	JG30-KF-CM45	NA	ASV_ 1131	78	25	222	151	43	17	107	106	78	91	131	71	0.000365465	0.000143083	0.000708882	0.000586585	0.000168682	6.63985e-05	0.000343939	0.000289316	0.000247964	0.000304348	0.000356153	0.000190564	0.000314282	1	1	1	1	1	0	1	1	1	1	1	1	4	0	0	0	0
63	Bacteria	Acidobacteriota	Acidobacteriae	GOUTB8	NA	NA	ASV_ 1136	80	53	58	49	35	28	31	35	45	93	67	84	0.000374835	0.000303336	0.000185204	0.000190349	0.0001373	0.000109362	9.96458e-05	9.5529e-05	0.000143056	0.000311037	0.000182155	0.000225456	0.000196439	1	1	1	1	1	1	0	0	1	1	1	1	4	0	0	0	0
64	Bacteria	Proteobacteria	Gammaproteobacteria	Burkholderiales	TRA3-20	NA	ASV_ 115	712	825	486	385	111	124	2697	4112	695	439	710	728	0.00333604	0.00472173	0.00155188	0.0014956	0.000435436	0.000484318	0.00866918	0.0112233	0.00220942	0.00146823	0.0019303	0.00195395	0.00328995	1	1	1	1	1	1	1	1	1	1	1	1	4	0	0	0	0
65	Bacteria	Desulfobacterota	Desulfobaccia	Desulfobaccales	Desulfobaccaceae	Desulfobacca	ASV_ 117	560	350	1515	1174	549	638	121	174	662	786	481	430	0.00262385	0.00200316	0.00483764	0.0045606	0.00215364	0.0024919	0.00038894	0.000474915	0.00210451	0.00262876	0.00130771	0.00115412	0.00222748	1	1	1	1	1	1	1	1	1	1	1	1	4	0	0	0	0
66	Archaea	Crenarchaeota	Bathyarchaeia	NA	NA	NA	ASV_ 118	203	142	675	530	43	34	280	430	68	71	76	59	0.000951145	0.00081271	0.00215539	0.00205888	0.000168682	0.000132797	0.000900026	0.00117364	0.000216174	0.000237458	0.000206623	0.000158356	0.000764323	1	1	1	1	1	1	1	1	1	1	1	1	4	0	0	0	0
67	Bacteria	Sva0485	NA	NA	NA	NA	ASV_ 1212	27	27	67	38	18	33	31	77	137	109	43	93	0.000126507	0.000154529	0.000213942	0.000147618	7.06112e-05	0.000128891	9.96458e-05	0.000210164	0.000435526	0.000364548	0.000116905	0.000249612	0.000193208	1	1	1	1	0	1	0	1	1	1	1	1	4	0	0	0	0
68	Bacteria	Chloroflexi	Anaerolineae	Anaerolineales	Anaerolineaceae	NA	ASV_ 123	639	210	805	551	638	238	703	1116	535	717	1185	575	0.002994	0.0012019	0.0025705	0.00214045	0.00250278	0.000929579	0.00225971	0.00304601	0.00170078	0.00239799	0.00322169	0.0015433	0.00220906	1	1	1	1	1	1	1	1	1	1	1	1	4	0	0	0	0
69	Bacteria	Chloroflexi	Anaerolineae	SBR1031	NA	NA	ASV_ 1237	68	73	128	65	109	0	44	59	86	132	85	120	0.00031861	0.000417802	0.000408725	0.000252504	0.00042759	0	0.000141433	0.000161035	0.000273396	0.000441472	0.000231092	0.00032208	0.000282978	1	1	1	1	1	0	1	1	1	1	1	1	4	0	0	0	0
70	Bacteria	Actinobacteriota	RBG-16-55-12	NA	NA	NA	ASV_ 125	418	202	265	183	290	130	224	240	501	670	425	222	0.00195852	0.00115611	0.000846188	0.000710895	0.00113763	0.000507753	0.000720021	0.000655056	0.00159269	0.0022408	0.00115546	0.000595848	0.00110641	1	1	1	1	1	1	1	1	1	1	1	1	4	0	0	0	0
71	Bacteria	Chloroflexi	Anaerolineae	SBR1031	NA	NA	ASV_ 1322	39	22	226	196	61	27	0	13	110	150	39	40	0.000182732	0.000125913	0.000721655	0.000761396	0.000239294	0.000105456	0	3.54822e-05	0.000349693	0.000501672	0.00010603	0.00010736	0.000269724	1	1	1	1	1	1	0	0	1	1	1	1	4	0	0	0	0
72	Bacteria	Acidobacteriota	Acidobacteriae	Subgroup 2	NA	NA	ASV_ 139	121	96	33	60	0	6	79	76	1593	1371	3166	3348	0.000566939	0.000549438	0.000105374	0.00023308	0	2.34348e-05	0.000253936	0.000207434	0.00506418	0.00458528	0.00860749	0.00898604	0.00243189	1	1	1	1	0	0	1	1	1	1	1	1	4	0	0	0	0
73	Bacteria	Nitrospirota	Thermodesulfovibrionia	NA	NA	NA	ASV_ 141	67	52	628	557	604	579	44	70	708	843	528	888	0.000313925	0.000297612	0.00200531	0.00216376	0.0023694	0.00226145	0.000141433	0.000191058	0.00225075	0.0028194	0.00143549	0.00238339	0.00155275	1	1	1	1	1	1	1	1	1	1	1	1	4	0	0	0	0
74	Archaea	Crenarchaeota	Bathyarchaeia	NA	NA	NA	ASV_ 142	296	280	508	138	447	307	0	31	183	189	154	172	0.00138689	0.00160253	0.00162213	0.000536085	0.00175351	0.00119908	0	8.46114e-05	0.000581761	0.000632107	0.000418684	0.000461648	0.000856586	1	1	1	1	1	1	0	0	1	1	1	1	4	0	0	0	0
75	Bacteria	Planctomycetota	Phycisphaerae	Phycisphaerales	Phycisphaeraceae	SM1A02	ASV_ 1440	124	45	40	37	0	0	16	17	0	0	11	0	0.000580995	0.000257549	0.000127727	0.000143733	0	0	5.14301e-05	4.63998e-05	0	0	2.9906e-05	0	0.000103145	1	1	1	1	0	0	0	0	0	0	0	0	4	0	0	0	0
76	Bacteria	Chloroflexi	Anaerolineae	SBR1031	NA	NA	ASV_ 1447	31	29	49	47	42	0	0	0	85	94	66	50	0.000145249	0.000165976	0.000156465	0.00018258	0.00016476	0	0	0	0.000270217	0.000314381	0.000179436	0.0001342	0.000142772	1	1	1	1	1	0	0	0	1	1	1	1	4	0	0	0	0
77	Bacteria	Proteobacteria	Alphaproteobacteria	NA	NA	NA	ASV_ 1449	112	130	62	45	6	0	28	50	59	72	79	72	0.00052477	0.000744031	0.000197976	0.00017481	2.35371e-05	0	9.00026e-05	0.00013647	0.000187562	0.000240803	0.00021478	0.000193248	0.000227332	1	1	1	1	0	0	0	1	1	1	1	1	4	0	0	0	0
78	Bacteria	Actinobacteriota	MB-A2-108	NA	NA	NA	ASV_ 1472	99	34	56	37	36	12	114	87	40	46	185	57	0.000463859	0.000194593	0.000178817	0.000143733	0.000141222	4.68695e-05	0.000366439	0.000237458	0.000127161	0.000153846	0.000502965	0.000152988	0.000225829	1	1	1	1	1	0	1	1	1	1	1	1	4	0	0	0	0
79	Bacteria	Deinococcota	Deinococci	Thermales	Thermaceae	Meiothermus	ASV_ 149	99	45	87	73	120	53	95	72	29	40	9	0	0.000463859	0.000257549	0.000277805	0.000283581	0.000470741	0.000207007	0.000305366	0.000196517	9.21917e-05	0.000133779	2.44686e-05	0	0.000226072	1	1	1	1	1	1	1	1	0	1	0	0	4	0	0	0	0
80	Bacteria	Chloroflexi	Anaerolineae	NA	NA	NA	ASV_ 1507	37	22	65	49	34	29	21	27	112	117	121	97	0.000173361	0.000125913	0.000207556	0.000190349	0.000133377	0.000113268	6.7502e-05	7.36938e-05	0.000356051	0.000391304	0.000328966	0.000260348	0.000201807	1	1	1	1	1	1	0	0	1	1	1	1	4	0	0	0	0
81	Bacteria	NA	NA	NA	NA	NA	ASV_ 151	91	67	837	647	418	424	0	16	260	334	111	270	0.000426375	0.000383462	0.00267268	0.00251338	0.00163975	0.00165606	0	4.36704e-05	0.000826546	0.00111706	0.000301779	0.00072468	0.00102545	1	1	1	1	1	1	0	0	1	1	1	1	4	0	0	0	0
82	Archaea	Crenarchaeota	Bathyarchaeia	NA	NA	NA	ASV_ 153	661	570	249	219	367	509	291	391	1072	1106	727	1031	0.00309708	0.00326229	0.000795098	0.000850743	0.00143968	0.00198805	0.000935385	0.0010672	0.00340791	0.003699	0.00197652	0.00276721	0.00210718	1	1	1	1	1	1	1	1	1	1	1	1	4	0	0	0	0
83	Bacteria	Proteobacteria	Alphaproteobacteria	Tistrellales	Geminicoccaceae	Candidatus Alysiosphaera	ASV_ 154	657	234	757	424	1334	167	245	141	707	924	1266	562	0.00307834	0.00133926	0.00241723	0.0016471	0.00523308	0.000652267	0.000787523	0.000384845	0.00224757	0.0030903	0.00344191	0.00150841	0.00215232	1	1	1	1	1	1	1	1	1	1	1	1	4	0	0	0	0
84	Bacteria	Armatimonadota	Fimbriimonadia	Fimbriimonadales	NA	NA	ASV_ 1604	33	20	100	56	30	8	0	0	13	12	0	0	0.00015462	0.000114466	0.000319316	0.000217542	0.000117685	3.12463e-05	0	0	4.13273e-05	4.01338e-05	0	0	8.63614e-05	1	1	1	1	1	0	0	0	0	0	0	0	4	0	0	0	0
85	Bacteria	Chloroflexi	Anaerolineae	RBG-13-54-9	NA	NA	ASV_ 163	278	153	605	471	316	178	22	60	475	519	343	277	0.00130255	0.000875667	0.00193186	0.00182968	0.00123962	0.000695231	7.07164e-05	0.000163764	0.00151004	0.00173579	0.000932524	0.000743468	0.00108591	1	1	1	1	1	1	0	1	1	1	1	1	4	0	0	0	0
86	Bacteria	Firmicutes	Clostridia	Clostridiales	Clostridiaceae	Clostridium sensu stricto 7	ASV_ 1640	65	25	49	60	15	0	16	22	21	26	57	74	0.000304554	0.000143083	0.000156465	0.00023308	5.88427e-05	0	5.14301e-05	6.00468e-05	6.67595e-05	8.69565e-05	0.000154968	0.000198616	0.000126233	1	1	1	1	0	0	0	0	0	0	1	1	4	0	0	0	0
87	Bacteria	Chloroflexi	Anaerolineae	ADurb.Bin180	NA	NA	ASV_ 1648	241	111	148	91	74	0	0	0	88	0	0	76	0.00112919	0.000635288	0.000472588	0.000353505	0.000290291	0	0	0	0.000279754	0	0	0.000203984	0.000280383	1	1	1	1	1	0	0	0	1	0	0	1	4	0	0	0	0
88	Bacteria	Proteobacteria	Alphaproteobacteria	Rhizobiales	Amb-16S-1323	NA	ASV_ 166	944	573	160	98	58	0	2555	2898	242	227	709	532	0.00442306	0.00327946	0.000510906	0.000380698	0.000227525	0	0.00821274	0.0079098	0.000769324	0.000759197	0.00192758	0.00142789	0.00248568	1	1	1	1	1	0	1	1	1	1	1	1	4	0	0	0	0
89	Bacteria	Acetothermia	Acetothermiia	NA	NA	NA	ASV_ 168	798	431	69	58	448	415	107	190	943	1055	672	694	0.00373898	0.00246675	0.000220328	0.000225311	0.00175743	0.0016209	0.000343939	0.000518586	0.00299782	0.00352843	0.00182699	0.0018627	0.00175901	1	1	1	1	1	1	1	1	1	1	1	1	4	0	0	0	0
90	Bacteria	Chloroflexi	OLB14	NA	NA	NA	ASV_ 169	383	259	67	35	305	126	1716	1808	635	730	1304	1018	0.00179452	0.00148234	0.000213942	0.000135964	0.00119647	0.00049213	0.00551588	0.00493475	0.00201868	0.00244147	0.00354522	0.00273231	0.00220864	1	1	1	1	1	1	1	1	1	1	1	1	4	0	0	0	0
91	Bacteria	Acidobacteriota	Subgroup 21	NA	NA	NA	ASV_ 170	395	259	215	137	504	470	819	956	297	320	328	256	0.00185075	0.00148234	0.00068653	0.0005322	0.00197711	0.00183572	0.00263258	0.00260931	0.00094417	0.00107023	0.000891743	0.000687104	0.00143332	1	1	1	1	1	1	1	1	1	1	1	1	4	0	0	0	0
92	Bacteria	Chloroflexi	Anaerolineae	SBR1031	NA	NA	ASV_ 173	429	124	291	227	34	0	1201	1560	988	1193	1220	605	0.00201005	0.000709691	0.000929211	0.000881821	0.000133377	0	0.00386047	0.00425786	0.00314088	0.00398997	0.00331685	0.00162382	0.00207117	1	1	1	1	1	0	1	1	1	1	1	1	4	0	0	0	0
93	Bacteria	Proteobacteria	Gammaproteobacteria	Burkholderiales	Nitrosomonadaceae	966-1	ASV_ 177	313	198	34	29	0	0	1561	2041	40	64	1399	1207	0.00146654	0.00113322	0.000108568	0.000112655	0	0	0.00501765	0.0055707	0.000127161	0.000214047	0.0038035	0.00323959	0.0017328	1	1	1	1	0	0	1	1	1	1	1	1	4	0	0	0	0
94	Archaea	Crenarchaeota	Methanomethylicia	Methanomethyliales	Methanomethyliaceae	Candidatus Methanomethylicus	ASV_ 183	374	384	523	465	522	854	219	414	995	1014	410	638	0.00175236	0.00219775	0.00167002	0.00180637	0.00204773	0.00333555	0.000703949	0.00112997	0.00316313	0.0033913	0.00111468	0.00171239	0.0020021	1	1	1	1	1	1	1	1	1	1	1	1	4	0	0	0	0
95	Bacteria	Chloroflexi	Anaerolineae	Caldilineales	Caldilineaceae	NA	ASV_ 1836	85	39	35	45	0	0	96	83	41	51	89	52	0.000398263	0.000223209	0.000111761	0.00017481	0	0	0.00030858	0.00022654	0.00013034	0.000170569	0.000241967	0.000139568	0.000177134	1	1	1	1	0	0	1	1	1	1	1	1	4	0	0	0	0
96	Bacteria	Bacteroidota	Bacteroidia	Chitinophagales	Saprospiraceae	Lewinella	ASV_ 185	36	26	44	30	28	12	0	0	6	0	1959	1639	0.000168676	0.000148806	0.000140499	0.00011654	0.00010984	4.68695e-05	0	0	1.90741e-05	0	0.00532599	0.00439908	0.000872948	1	1	1	1	1	0	0	0	0	0	1	1	4	0	0	0	0
97	Bacteria	Chloroflexi	Anaerolineae	SBR1031	NA	NA	ASV_ 189	234	83	1490	917	448	163	232	264	482	513	655	382	0.00109639	0.000475035	0.00475781	0.00356224	0.00175743	0.000636644	0.000745736	0.000720561	0.00153229	0.00171572	0.00178077	0.00102529	0.00165049	1	1	1	1	1	1	1	1	1	1	1	1	4	0	0	0	0
98	Archaea	Crenarchaeota	Bathyarchaeia	NA	NA	NA	ASV_ 192	106	82	86	47	73	0	0	0	232	237	191	233	0.000496657	0.000469312	0.000274612	0.00018258	0.000286368	0	0	0	0.000737533	0.000792642	0.000519277	0.000625372	0.000365363	1	1	1	1	1	0	0	0	1	1	1	1	4	0	0	0	0
99	Bacteria	Chloroflexi	Anaerolineae	Anaerolineales	Anaerolineaceae	Bellilinea	ASV_ 194	58	40	1156	1041	818	336	0	20	242	180	144	135	0.000271756	0.000228932	0.0036913	0.00404394	0.00320889	0.00131235	0	5.4588e-05	0.000769324	0.000602007	0.000391497	0.00036234	0.00124474	1	1	1	1	1	1	0	0	1	1	1	1	4	0	0	0	0
100	Bacteria	Chloroflexi	Anaerolineae	Anaerolineales	Anaerolineaceae	NA	ASV_ 196	194	95	482	360	120	114	287	327	341	373	474	502	0.000908976	0.000543715	0.00153911	0.00139848	0.000470741	0.00044526	0.000922527	0.000892514	0.00108405	0.00124749	0.00128868	0.00134737	0.00100741	1	1	1	1	1	1	1	1	1	1	1	1	4	0	0	0	0
101	Archaea	Crenarchaeota	Bathyarchaeia	NA	NA	NA	ASV_ 197	212	205	734	566	32	13	145	197	278	302	232	201	0.000993314	0.00117328	0.00234378	0.00219872	0.000125531	5.07753e-05	0.000466085	0.000537692	0.000883769	0.00101003	0.000630745	0.000539484	0.000912768	1	1	1	1	1	0	1	1	1	1	1	1	4	0	0	0	0
102	Archaea	Crenarchaeota	Bathyarchaeia	NA	NA	NA	ASV_ 204	137	101	208	188	0	23	133	147	128	96	67	79	0.000641906	0.000578055	0.000664178	0.000730318	0	8.98332e-05	0.000427513	0.000401222	0.000406915	0.00032107	0.000182155	0.000212036	0.000387933	1	1	1	1	0	0	1	1	1	1	1	1	4	0	0	0	0
103	Bacteria	Chloroflexi	Anaerolineae	Anaerolineales	Anaerolineaceae	Anaerolinea	ASV_ 2049	40	40	234	129	0	0	0	0	0	0	0	0	0.000187418	0.000228932	0.0007472	0.000501123	0	0	0	0	0	0	0	0	0.000138723	1	1	1	1	0	0	0	0	0	0	0	0	4	0	0	0	0
104	Bacteria	Planctomycetota	Phycisphaerae	MSBL9	KCLunmb-38-53	NA	ASV_ 208	35	45	216	123	379	951	13	18	477	390	948	1609	0.00016399	0.000257549	0.000689723	0.000477815	0.00148676	0.00371441	4.17869e-05	4.91292e-05	0.00151639	0.00130435	0.00257735	0.00431856	0.00138315	1	1	1	1	1	1	0	0	1	1	1	1	4	0	0	0	0
105	Bacteria	Verrucomicrobiota	Verrucomicrobiae	Pedosphaerales	Pedosphaeraceae	NA	ASV_ 209	167	190	490	410	166	391	0	0	633	502	236	379	0.000782469	0.00108743	0.00156465	0.00159272	0.000651192	0.00152716	0	0	0.00201232	0.00167893	0.00064162	0.00101724	0.00104631	1	1	1	1	1	1	0	0	1	1	1	1	4	0	0	0	0
106	Bacteria	Bacteroidota	Bacteroidia	Chitinophagales	Saprospiraceae	Phaeodactylibacter	ASV_ 21	641	619	198	173	745	626	1780	1412	2423	2485	1515	1995	0.00300337	0.00354273	0.000632246	0.000672048	0.00292252	0.00244503	0.0057216	0.00385391	0.00770277	0.00831104	0.00411887	0.00535458	0.00402339	1	1	1	1	1	1	1	1	1	1	1	1	4	0	0	0	0
107	Bacteria	Proteobacteria	Gammaproteobacteria	NA	NA	NA	ASV_ 2118	45	39	95	86	0	0	0	0	0	0	0	0	0.000210845	0.000223209	0.000303351	0.000334082	0	0	0	0	0	0	0	0	8.92905e-05	1	1	1	1	0	0	0	0	0	0	0	0	4	0	0	0	0
108	Bacteria	Chloroflexi	Anaerolineae	ADurb.Bin180	NA	NA	ASV_ 214	854	469	578	353	425	330	233	242	640	660	529	447	0.00400137	0.00268423	0.00184565	0.00137129	0.00166721	0.00128891	0.000748951	0.000660515	0.00203458	0.00220736	0.00143821	0.00119975	0.00176233	1	1	1	1	1	1	1	1	1	1	1	1	4	0	0	0	0
109	Bacteria	Calditrichota	Calditrichia	Calditrichales	Calditrichaceae	Calorithrix	ASV_ 215	127	136	750	485	21	50	0	0	946	897	635	858	0.000595051	0.00077837	0.00239487	0.00188407	8.23798e-05	0.00019529	0	0	0.00300736	0.003	0.00172639	0.00230287	0.00133055	1	1	1	1	0	1	0	0	1	1	1	1	4	0	0	0	0
110	Archaea	Crenarchaeota	Bathyarchaeia	NA	NA	NA	ASV_ 217	413	444	100	69	110	206	0	46	499	457	344	551	0.00193509	0.00254115	0.000319316	0.000268042	0.000431513	0.000804593	0	0.000125552	0.00158633	0.00152843	0.000935243	0.00147888	0.000996179	1	1	1	1	1	1	0	1	1	1	1	1	4	0	0	0	0
111	Bacteria	Proteobacteria	Gammaproteobacteria	Xanthomonadales	NA	NA	ASV_ 2189	49	38	61	50	0	0	0	0	0	0	8	6	0.000229587	0.000217486	0.000194783	0.000194234	0	0	0	0	0	0	2.17498e-05	1.6104e-05	7.28286e-05	1	1	1	1	0	0	0	0	0	0	0	0	4	0	0	0	0
112	Bacteria	Verrucomicrobiota	Verrucomicrobiae	Chthoniobacterales	NA	NA	ASV_ 220	447	348	79	71	165	66	0	0	0	0	148	91	0.00209439	0.00199171	0.00025226	0.000275812	0.00064727	0.000257782	0	0	0	0	0.000402372	0.000244244	0.00051382	1	1	1	1	1	1	0	0	0	0	1	1	4	0	0	0	0
113	Bacteria	Chloroflexi	Anaerolineae	SBR1031	NA	NA	ASV_ 230	212	115	212	180	99	83	38	104	520	667	782	696	0.000993314	0.000658181	0.000676951	0.000699241	0.000388362	0.000324181	0.000122146	0.000283858	0.00165309	0.00223077	0.00212605	0.00186807	0.00100202	1	1	1	1	1	1	1	1	1	1	1	1	4	0	0	0	0
114	Bacteria	Acidobacteriota	Acidobacteriae	NA	NA	NA	ASV_ 2322	71	42	61	47	0	0	126	160	0	0	0	0	0.000332666	0.000240379	0.000194783	0.00018258	0	0	0.000405012	0.000436704	0	0	0	0	0.000149344	1	1	1	1	0	0	1	1	0	0	0	0	4	0	0	0	0
115	Bacteria	Acidobacteriota	Subgroup 21	NA	NA	NA	ASV_ 236	89	50	114	86	455	614	0	0	58	49	61	82	0.000417004	0.000286166	0.000364021	0.000334082	0.00178489	0.00239816	0	0	0.000184383	0.00016388	0.000165842	0.000220088	0.000526543	1	1	1	1	1	1	0	0	1	1	1	1	4	0	0	0	0
116	Archaea	Crenarchaeota	Bathyarchaeia	NA	NA	NA	ASV_ 241	444	351	76	79	49	40	0	71	1008	818	647	818	0.00208034	0.00200888	0.00024268	0.000306889	0.000192219	0.000156232	0	0.000193787	0.00320446	0.00273579	0.00175902	0.00219551	0.00125632	1	1	1	1	1	1	0	1	1	1	1	1	4	0	0	0	0
117	Bacteria	Desulfobacterota	Syntrophobacteria	Syntrophobacterales	Syntrophobacteraceae	Desulfoglaeba	ASV_ 244	130	72	798	459	145	45	71	69	785	660	1139	779	0.000609108	0.000412078	0.00254814	0.00178306	0.000568813	0.000175761	0.000228221	0.000188329	0.00249553	0.00220736	0.00309663	0.00209084	0.00136699	1	1	1	1	1	1	1	1	1	1	1	1	4	0	0	0	0
118	Bacteria	Synergistota	Synergistia	Synergistales	Synergistaceae	JGI-0000079-D21	ASV_ 249	58	58	732	576	292	408	18	31	126	151	27	31	0.000271756	0.000331952	0.0023374	0.00223757	0.00114547	0.00159356	5.78588e-05	8.46114e-05	0.000400557	0.000505017	7.34057e-05	8.32041e-05	0.000760197	1	1	1	1	1	1	0	0	1	1	0	0	4	0	0	0	0
119	Bacteria	Chloroflexi	Dehalococcoidia	GIF9	AB-539-J10	SCGC-AB-539-J10	ASV_ 250	682	462	584	483	977	1126	0	21	224	222	138	145	0.00319547	0.00264417	0.00186481	0.0018763	0.00383262	0.00439792	0	5.73174e-05	0.000712101	0.000742475	0.000375185	0.00038918	0.00167396	1	1	1	1	1	1	0	0	1	1	1	1	4	0	0	0	0
120	Archaea	Crenarchaeota	Bathyarchaeia	NA	NA	NA	ASV_ 255	696	604	73	64	71	66	98	132	860	656	626	867	0.00326107	0.00345688	0.000233101	0.000248619	0.000278522	0.000257782	0.000315009	0.000360281	0.00273396	0.00219398	0.00170192	0.00232703	0.00144735	1	1	1	1	1	1	1	1	1	1	1	1	4	0	0	0	0
121	Bacteria	Chloroflexi	Anaerolineae	Anaerolineales	Anaerolineaceae	NA	ASV_ 257	27	30	401	248	0	0	50	78	590	538	1013	1048	0.000126507	0.000171699	0.00128046	0.000963399	0	0	0.000160719	0.000212893	0.00187562	0.00179933	0.00275407	0.00281283	0.00101313	1	1	1	1	0	0	1	1	1	1	1	1	4	0	0	0	0
122	Bacteria	Chloroflexi	Anaerolineae	SBR1031	NA	NA	ASV_ 262	130	52	348	222	91	64	91	114	279	258	610	540	0.000609108	0.000297612	0.00111122	0.000862397	0.000356979	0.000249971	0.000292509	0.000311152	0.000886948	0.000862876	0.00165842	0.00144936	0.000745713	1	1	1	1	1	1	1	1	1	1	1	1	4	0	0	0	0
123	Bacteria	Chloroflexi	Anaerolineae	SBR1031	NA	NA	ASV_ 263	162	51	625	429	273	123	107	114	351	420	1200	677	0.000759042	0.000291889	0.00199573	0.00166652	0.00107094	0.000480412	0.000343939	0.000311152	0.00111584	0.00140468	0.00326247	0.00181707	0.00120997	1	1	1	1	1	1	1	1	1	1	1	1	4	0	0	0	0
124	Bacteria	Planctomycetota	Planctomycetes	Pirellulales	Pirellulaceae	NA	ASV_ 264	126	44	124	129	159	36	1021	1326	491	409	1352	1032	0.000590366	0.000251826	0.000395952	0.000501123	0.000623732	0.000140609	0.00328188	0.00361918	0.0015609	0.00136789	0.00367572	0.00276989	0.00156492	1	1	1	1	1	1	1	1	1	1	1	1	4	0	0	0	0
125	Bacteria	Desulfobacterota	Desulfobacteria	Desulfatiglandales	Desulfatiglandaceae	Desulfatiglans	ASV_ 265	59	63	1169	1006	184	550	0	0	42	31	0	26	0.000276441	0.000360569	0.00373281	0.00390798	0.000721804	0.00214819	0	0	0.000133519	0.000103679	0	6.9784e-05	0.000954564	1	1	1	1	1	1	0	0	1	1	0	0	4	0	0	0	0
126	Bacteria	Proteobacteria	Gammaproteobacteria	Ectothiorhodospirales	Thioalkalispiraceae	Thioalkalispira-Sulfurivermis	ASV_ 267	775	736	258	243	0	0	54	115	67	91	389	322	0.00363122	0.00421236	0.000823836	0.000943975	0	0	0.000173577	0.000313881	0.000212995	0.000304348	0.00105759	0.000864249	0.00104484	1	1	1	1	0	0	1	1	1	1	1	1	4	0	0	0	0
127	Archaea	Crenarchaeota	Bathyarchaeia	NA	NA	NA	ASV_ 269	246	214	53	42	203	382	70	115	783	698	481	657	0.00115262	0.00122479	0.000169238	0.000163156	0.000796338	0.00149201	0.000225007	0.000313881	0.00248918	0.00233445	0.00130771	0.00176339	0.00111931	1	1	1	1	1	1	1	1	1	1	1	1	4	0	0	0	0
128	Bacteria	Proteobacteria	Alphaproteobacteria	Rhizobiales	Pleomorphomonadaceae	Chthonobacter	ASV_ 270	809	373	77	29	0	0	0	0	0	0	157	112	0.00379052	0.0021348	0.000245874	0.000112655	0	0	0	0	0	0	0.00042684	0.000300608	0.000584275	1	1	1	1	0	0	0	0	0	0	1	1	4	0	0	0	0
129	Bacteria	Bacteroidota	Bacteroidia	Bacteroidales	Williamwhitmaniaceae	Blvii28 wastewater-sludge group	ASV_ 271	78	66	1005	862	0	104	0	73	1338	1454	562	833	0.000365465	0.000377739	0.00320913	0.00334859	0	0.000406202	0	0.000199246	0.00425353	0.00486288	0.00152793	0.00223577	0.00173221	1	1	1	1	0	1	0	1	1	1	1	1	4	0	0	0	0
130	Bacteria	Proteobacteria	Gammaproteobacteria	Nitrosococcales	Nitrosococcaceae	NA	ASV_ 273	120	105	185	118	0	0	504	576	520	406	691	559	0.000562253	0.000600948	0.000590735	0.000458391	0	0	0.00162005	0.00157213	0.00165309	0.00135786	0.00187864	0.00150036	0.000982872	1	1	1	1	0	0	1	1	1	1	1	1	4	0	0	0	0
131	Bacteria	Acidobacteriota	Aminicenantia	Aminicenantales	NA	NA	ASV_ 276	306	209	345	299	277	248	0	0	99	76	61	106	0.00143375	0.00119617	0.00110164	0.00116152	0.00108663	0.000968636	0	0	0.000314723	0.000254181	0.000165842	0.000284504	0.000663966	1	1	1	1	1	1	0	0	1	1	1	1	4	0	0	0	0
132	Bacteria	TA06	NA	NA	NA	NA	ASV_ 282	123	83	1186	893	306	266	47	47	190	217	72	89	0.000576309	0.000475035	0.00378709	0.00346901	0.00120039	0.00103894	0.000151076	0.000128282	0.000604014	0.000725753	0.000195748	0.000238876	0.00104921	1	1	1	1	1	1	1	1	1	1	1	1	4	0	0	0	0
133	Archaea	Nanoarchaeota	Nanoarchaeia	Woesearchaeales	NA	NA	ASV_ 284	24	30	83	94	6	33	0	9	348	300	118	215	0.000112451	0.000171699	0.000265033	0.000365159	2.35371e-05	0.000128891	0	2.45646e-05	0.0011063	0.00100334	0.00032081	0.00057706	0.000341571	1	1	1	1	0	1	0	0	1	1	1	1	4	0	0	0	0
134	Bacteria	NA	NA	NA	NA	NA	ASV_ 294	48	33	1078	1010	164	559	0	0	209	164	21	34	0.000224901	0.000188869	0.00344223	0.00392352	0.000643347	0.00218334	0	0	0.000664416	0.000548495	5.70933e-05	9.12561e-05	0.000997289	1	1	1	1	1	1	0	0	1	1	0	0	4	0	0	0	0
135	Bacteria	Planctomycetota	Pla3 lineage	NA	NA	NA	ASV_ 303	355	244	240	161	350	252	286	407	542	954	745	453	0.00166333	0.00139649	0.000766359	0.000625432	0.001373	0.00098426	0.000919313	0.00111087	0.00172303	0.00319064	0.00202545	0.00121585	0.00141617	1	1	1	1	1	1	1	1	1	1	1	1	4	0	0	0	0
136	Bacteria	Bacteroidota	Bacteroidia	Sphingobacteriales	env.OPS 17	NA	ASV_ 3104	33	27	63	45	0	0	0	0	0	0	0	0	0.00015462	0.000154529	0.000201169	0.00017481	0	0	0	0	0	0	0	0	5.70941e-05	1	1	1	1	0	0	0	0	0	0	0	0	4	0	0	0	0
137	Bacteria	Chloroflexi	Anaerolineae	NA	NA	NA	ASV_ 315	45	18	41	40	0	0	860	1224	362	486	823	660	0.000210845	0.00010302	0.00013092	0.000155387	0	0	0.00276437	0.00334078	0.00115081	0.00162542	0.00223751	0.00177144	0.00112421	1	1	1	1	0	0	1	1	1	1	1	1	4	0	0	0	0
138	Archaea	Thermoplasmatota	Thermoplasmata	Methanomassiliicoccales	NA	NA	ASV_ 318	253	230	188	236	208	245	73	158	765	612	413	376	0.00118542	0.00131636	0.000600315	0.000916783	0.000815952	0.000956919	0.00023465	0.000431245	0.00243195	0.00204682	0.00112283	0.00100918	0.00108904	1	1	1	1	1	1	1	1	1	1	1	1	4	0	0	0	0
139	Bacteria	Spirochaetota	Spirochaetia	Spirochaetales	Spirochaetaceae	NA	ASV_ 326	143	71	108	98	88	30	47	89	324	401	285	335	0.000670018	0.000406355	0.000344862	0.000380698	0.00034521	0.000117174	0.000151076	0.000242917	0.00103	0.00134114	0.000774838	0.000899141	0.000558619	1	1	1	1	1	1	1	1	1	1	1	1	4	0	0	0	0
140	Bacteria	Patescibacteria	ABY1	NA	NA	NA	ASV_ 3307	27	22	88	87	0	12	0	0	19	23	0	0	0.000126507	0.000125913	0.000280998	0.000337966	0	4.68695e-05	0	0	6.04014e-05	7.69231e-05	0	0	8.79649e-05	1	1	1	1	0	0	0	0	0	0	0	0	4	0	0	0	0
141	Bacteria	Proteobacteria	Gammaproteobacteria	Pseudomonadales	KI89A clade	NA	ASV_ 3315	37	27	37	28	0	0	0	0	0	0	36	11	0.000173361	0.000154529	0.000118147	0.000108771	0	0	0	0	0	0	9.78742e-05	2.9524e-05	5.68506e-05	1	1	1	1	0	0	0	0	0	0	0	0	4	0	0	0	0
142	Bacteria	Proteobacteria	Alphaproteobacteria	Caulobacterales	Parvularculaceae	Amphiplicatus	ASV_ 332	298	303	61	43	139	103	0	0	0	0	121	115	0.00139626	0.00173416	0.000194783	0.000167041	0.000545276	0.000402297	0	0	0	0	0.000328966	0.00030866	0.000423121	1	1	1	1	1	1	0	0	0	0	1	1	4	0	0	0	0
143	Archaea	Crenarchaeota	Bathyarchaeia	NA	NA	NA	ASV_ 335	302	245	94	73	181	281	219	273	535	562	319	479	0.001415	0.00140221	0.000300157	0.000283581	0.000710035	0.00109753	0.000703949	0.000745126	0.00170078	0.0018796	0.000867274	0.00128564	0.00103257	1	1	1	1	1	1	1	1	1	1	1	1	4	0	0	0	0
144	Bacteria	Planctomycetota	Planctomycetes	Pirellulales	Pirellulaceae	Rhodopirellula	ASV_ 336	504	209	181	120	926	62	71	45	300	236	1128	897	0.00236146	0.00119617	0.000577963	0.000466161	0.00363255	0.000242159	0.000228221	0.000122823	0.000953707	0.000789298	0.00306673	0.00240755	0.00133707	1	1	1	1	1	1	1	1	1	1	1	1	4	0	0	0	0
145	Bacteria	Chloroflexi	Chloroflexia	Thermomicrobiales	AKYG1722	NA	ASV_ 3374	41	20	98	58	26	0	0	0	0	20	0	0	0.000192103	0.000114466	0.00031293	0.000225311	0.000101994	0	0	0	0	6.68896e-05	0	0	8.44745e-05	1	1	1	1	1	0	0	0	0	0	0	0	4	0	0	0	0
146	Bacteria	Bacteroidota	Ignavibacteria	Ignavibacteriales	Ignavibacteriaceae	Ignavibacterium	ASV_ 34	960	700	1444	1070	193	277	1159	1453	2612	2505	2834	5587	0.00449803	0.00400632	0.00461093	0.0041566	0.000757109	0.0010819	0.00372547	0.00396582	0.00830361	0.00837793	0.00770488	0.0149955	0.00551534	1	1	1	1	1	1	1	1	1	1	1	1	4	0	0	0	0
147	Archaea	Crenarchaeota	Bathyarchaeia	NA	NA	NA	ASV_ 342	117	127	70	67	158	211	0	0	149	128	63	104	0.000548197	0.000726861	0.000223521	0.000260273	0.00061981	0.000824122	0	0	0.000473675	0.000428094	0.00017128	0.000279136	0.000379581	1	1	1	1	1	1	0	0	1	1	1	1	4	0	0	0	0
148	Bacteria	Sumerlaeota	Sumerlaeia	NA	NA	NA	ASV_ 354	106	108	90	90	0	0	1164	1297	141	87	414	345	0.000496657	0.000618118	0.000287385	0.00034962	0	0	0.00374154	0.00354003	0.000448242	0.00029097	0.00112555	0.000925981	0.000985341	1	1	1	1	0	0	1	1	1	1	1	1	4	0	0	0	0
149	Bacteria	Desulfobacterota	NA	NA	NA	NA	ASV_ 359	130	122	177	171	69	99	154	237	721	700	367	417	0.000609108	0.000698244	0.00056519	0.000664279	0.000270676	0.000386673	0.000495014	0.000646868	0.00229208	0.00234114	0.000997773	0.00111923	0.000923856	1	1	1	1	1	1	1	1	1	1	1	1	4	0	0	0	0
150	Archaea	Crenarchaeota	Bathyarchaeia	NA	NA	NA	ASV_ 375	316	492	80	67	134	328	351	651	456	366	184	359	0.0014806	0.00281587	0.000255453	0.000260273	0.000525661	0.0012811	0.00112825	0.00177684	0.00144963	0.00122408	0.000500246	0.000963557	0.00113846	1	1	1	1	1	1	1	1	1	1	1	1	4	0	0	0	0
151	Bacteria	Proteobacteria	Alphaproteobacteria	Rhizobiales	Xanthobacteraceae	NA	ASV_ 3798	68	54	50	36	0	0	15	0	0	0	0	0	0.00031861	0.000309059	0.000159658	0.000139848	0	0	4.82157e-05	0	0	0	0	0	8.12826e-05	1	1	1	1	0	0	0	0	0	0	0	0	4	0	0	0	0
152	Bacteria	Planctomycetota	Phycisphaerae	Phycisphaerales	Phycisphaeraceae	SM1A02	ASV_ 386	109	49	76	59	105	117	14	15	21	7	1370	1533	0.000510713	0.000280442	0.00024268	0.000229196	0.000411899	0.000456978	4.50013e-05	4.0941e-05	6.67595e-05	2.34114e-05	0.00372466	0.00411457	0.000845605	1	1	1	1	1	1	0	0	0	0	1	1	4	0	0	0	0
153	Archaea	Crenarchaeota	Nitrososphaeria	Caldiarchaeales	Caldiarchaeaceae	Candidatus Caldiarchaeum	ASV_ 387	30	28	127	47	96	77	0	0	28	0	14	24	0.000140563	0.000160253	0.000405532	0.00018258	0.000376593	0.000300746	0	0	8.90127e-05	0	3.80622e-05	6.4416e-05	0.00014648	1	1	1	1	1	1	0	0	0	0	0	0	4	0	0	0	0
154	Bacteria	Chloroflexi	Anaerolineae	SBR1031	NA	NA	ASV_ 39	255	154	860	527	852	600	0	0	51	55	139	88	0.00119479	0.00088139	0.00274612	0.00204722	0.00334226	0.00234348	0	0	0.00016213	0.000183946	0.000377903	0.000236192	0.00112629	1	1	1	1	1	1	0	0	1	1	1	1	4	0	0	0	0
155	Bacteria	Chloroflexi	Dehalococcoidia	SAR202 clade	NA	NA	ASV_ 394	140	93	430	401	61	65	105	181	329	278	486	378	0.000655962	0.000532268	0.00137306	0.00155775	0.000239294	0.000253876	0.00033751	0.000494021	0.0010459	0.000929766	0.0013213	0.00101455	0.000812939	1	1	1	1	1	1	1	1	1	1	1	1	4	0	0	0	0
156	Archaea	NA	NA	NA	NA	NA	ASV_ 3947	22	20	49	45	30	11	0	0	18	0	20	19	0.00010308	0.000114466	0.000156465	0.00017481	0.000117685	4.29637e-05	0	0	5.72224e-05	0	5.43746e-05	5.0996e-05	7.26719e-05	1	1	1	1	1	0	0	0	0	0	0	0	4	0	0	0	0
157	Bacteria	NA	NA	NA	NA	NA	ASV_ 396	114	115	338	271	11	11	397	744	237	254	376	463	0.00053414	0.000658181	0.00107929	0.00105275	4.31513e-05	4.29637e-05	0.00127611	0.00203067	0.000753429	0.000849498	0.00102224	0.00124269	0.000882093	1	1	1	1	0	0	1	1	1	1	1	1	4	0	0	0	0
158	Bacteria	Bacteroidota	Kapabacteria	Kapabacteriales	NA	NA	ASV_ 398	22	23	595	424	0	6	0	12	47	27	29	115	0.00010308	0.000131636	0.00189993	0.0016471	0	2.34348e-05	0	3.27528e-05	0.000149414	9.0301e-05	7.88431e-05	0.00030866	0.000372096	1	1	1	1	0	0	0	0	1	0	0	1	4	0	0	0	0
159	Bacteria	WS1	NA	NA	NA	NA	ASV_ 405	66	36	112	135	157	39	4	5	0	13	7	6	0.000309239	0.000206039	0.000357634	0.000524431	0.000615887	0.000152326	1.28575e-05	1.3647e-05	0	4.34783e-05	1.90311e-05	1.6104e-05	0.000189223	1	1	1	1	1	1	0	0	0	0	0	0	4	0	0	0	0
160	Bacteria	Bacteroidota	Rhodothermia	Balneolales	Balneolaceae	NA	ASV_ 412	85	108	193	167	626	533	3	0	114	88	61	84	0.000398263	0.000618118	0.000616281	0.00064874	0.0024557	0.00208179	9.64314e-06	0	0.000362409	0.000294314	0.000165842	0.000225456	0.00065638	1	1	1	1	1	1	0	0	1	1	1	1	4	0	0	0	0
161	Bacteria	Planctomycetota	Planctomycetes	Pirellulales	Pirellulaceae	Thermogutta	ASV_ 415	141	70	1161	915	295	98	0	0	18	26	15	13	0.000660647	0.000400632	0.00370726	0.00355447	0.00115724	0.000382768	0	0	5.72224e-05	8.69565e-05	4.07809e-05	3.4892e-05	0.00084024	1	1	1	1	1	1	0	0	0	0	0	0	4	0	0	0	0
162	Bacteria	Chloroflexi	Anaerolineae	SBR1031	NA	NA	ASV_ 416	172	84	108	98	0	0	0	0	364	392	500	420	0.000805896	0.000480758	0.000344862	0.000380698	0	0	0	0	0.00115716	0.00131104	0.00135936	0.00112728	0.000580588	1	1	1	1	0	0	0	0	1	1	1	1	4	0	0	0	0
163	Bacteria	Proteobacteria	Gammaproteobacteria	PLTA13	NA	NA	ASV_ 421	260	158	179	147	214	160	0	0	0	0	206	163	0.00121822	0.000904283	0.000571576	0.000571047	0.000839489	0.000624927	0	0	0	0	0.000560058	0.000437492	0.000477257	1	1	1	1	1	1	0	0	0	0	1	1	4	0	0	0	0
164	Bacteria	Actinobacteriota	NA	NA	NA	NA	ASV_ 430	54	53	375	265	86	54	20	0	94	123	66	88	0.000253014	0.000303336	0.00119744	0.00102944	0.000337365	0.000210913	6.42876e-05	0	0.000298828	0.000411371	0.000179436	0.000236192	0.000376801	1	1	1	1	1	1	0	0	1	1	1	1	4	0	0	0	0
165	Archaea	Crenarchaeota	Bathyarchaeia	NA	NA	NA	ASV_ 437	223	167	72	69	116	124	168	214	403	450	267	396	0.00104485	0.000955793	0.000229908	0.000268042	0.00045505	0.000484318	0.000540016	0.000584091	0.00128115	0.00150502	0.000725901	0.00106286	0.000761417	1	1	1	1	1	1	1	1	1	1	1	1	4	0	0	0	0
166	Bacteria	Bacteroidota	Bacteroidia	Bacteroidales	Williamwhitmaniaceae	Blvii28 wastewater-sludge group	ASV_ 448	110	101	1165	964	190	927	0	0	0	65	148	184	0.000515399	0.000578055	0.00372004	0.00374482	0.000745341	0.00362067	0	0	0	0.000217391	0.000402372	0.000493856	0.00116983	1	1	1	1	1	1	0	0	0	1	1	1	4	0	0	0	0
167	Bacteria	Acidobacteriota	Acidobacteriae	NA	NA	NA	ASV_ 461	127	111	109	100	12	47	13	15	386	524	922	644	0.000595051	0.000635288	0.000348055	0.000388467	4.70741e-05	0.000183572	4.17869e-05	4.0941e-05	0.0012271	0.00175251	0.00250667	0.0017285	0.000791251	1	1	1	1	0	1	0	0	1	1	1	1	4	0	0	0	0
168	Bacteria	Bacteroidota	Rhodothermia	Rhodothermales	Rhodothermaceae	NA	ASV_ 465	102	64	1189	1053	236	190	25	19	192	60	0	27	0.000477915	0.000366292	0.00379667	0.00409056	0.000925792	0.000742101	8.03595e-05	5.18586e-05	0.000610373	0.000200669	0	7.2468e-05	0.000951255	1	1	1	1	1	1	0	0	1	1	0	0	4	0	0	0	0
169	Bacteria	Chloroflexi	Anaerolineae	NA	NA	NA	ASV_ 466	115	49	308	242	197	40	123	137	100	166	212	151	0.000538826	0.000280442	0.000983495	0.000940091	0.000772801	0.000156232	0.000395369	0.000373928	0.000317902	0.000555184	0.00057637	0.000405284	0.00052466	1	1	1	1	1	1	1	1	1	1	1	1	4	0	0	0	0
170	Bacteria	Caldatribacteriota	Caldatribacteriia	Caldatribacteriales	Caldatribacteriaceae	Candidatus Caldatribacterium	ASV_ 474	140	69	68	54	263	100	0	0	0	0	0	0	0.000655962	0.000394909	0.000217135	0.000209772	0.00103171	0.000390579	0	0	0	0	0	0	0.000241672	1	1	1	1	1	1	0	0	0	0	0	0	4	0	0	0	0
171	Bacteria	Proteobacteria	Gammaproteobacteria	Burkholderiales	NA	NA	ASV_ 475	40	20	102	96	0	0	89	125	291	259	477	392	0.000187418	0.000114466	0.000325703	0.000372928	0	0	0.00028608	0.000341175	0.000925096	0.000866221	0.00129683	0.00105213	0.000480671	1	1	1	1	0	0	1	1	1	1	1	1	4	0	0	0	0
172	Bacteria	Chloroflexi	Anaerolineae	Anaerolineales	Anaerolineaceae	NA	ASV_ 483	218	128	393	265	83	60	190	282	0	64	0	0	0.00102143	0.000732584	0.00125491	0.00102944	0.000325596	0.000234348	0.000610732	0.000769691	0	0.000214047	0	0	0.000516065	1	1	1	1	1	1	1	1	0	1	0	0	4	0	0	0	0
173	Bacteria	Bacteroidota	Bacteroidia	Chitinophagales	Saprospiraceae	NA	ASV_ 49	42	21	98	95	47	18	0	0	0	0	642	910	0.000196789	0.00012019	0.00031293	0.000369044	0.000184374	7.03043e-05	0	0	0	0	0.00174542	0.00244244	0.000453458	1	1	1	1	1	0	0	0	0	0	1	1	4	0	0	0	0
174	Bacteria	Chloroflexi	Anaerolineae	Anaerolineales	Anaerolineaceae	NA	ASV_ 490	92	49	709	501	28	14	87	65	72	67	137	101	0.000431061	0.000280442	0.00226395	0.00194622	0.00010984	5.46811e-05	0.000279651	0.000177411	0.00022889	0.00022408	0.000372466	0.000271084	0.000553315	1	1	1	1	1	0	1	1	1	1	1	1	4	0	0	0	0
175	Bacteria	Chloroflexi	Dehalococcoidia	GIF9	NA	NA	ASV_ 492	81	108	50	46	46	87	7	0	73	121	80	182	0.000379521	0.000618118	0.000159658	0.000178695	0.000180451	0.000339804	2.25007e-05	0	0.000232069	0.000404682	0.000217498	0.000488488	0.000268457	1	1	1	1	1	1	0	0	1	1	1	1	4	0	0	0	0
176	Bacteria	Proteobacteria	Alphaproteobacteria	Rhodobacterales	Rhodobacteraceae	Oceanicella	ASV_ 495	80	37	55	46	986	242	80	58	0	16	195	150	0.000374835	0.000211763	0.000175624	0.000178695	0.00386793	0.000945202	0.00025715	0.000158305	0	5.35117e-05	0.000530152	0.0004026	0.000596314	1	1	1	1	1	1	1	1	0	0	1	1	4	0	0	0	0
177	Bacteria	Cyanobacteria	Cyanobacteria	Cyanobacteriales	Paraspirulinaceae	Spirulina CCC Snake P-Y-85	ASV_ 5	73	109	41	33	327	284	9547	14126	21429	16141	19055	19899	0.000342037	0.000623841	0.00013092	0.000128194	0.00128277	0.00110925	0.0306877	0.0385555	0.0681233	0.0539833	0.0518054	0.053409	0.0250151	1	1	1	1	1	1	1	1	1	1	1	1	4	0	0	0	0
178	Bacteria	Proteobacteria	Alphaproteobacteria	Rhizobiales	NA	NA	ASV_ 5011	51	25	37	32	0	0	0	0	0	0	0	0	0.000238958	0.000143083	0.000118147	0.000124309	0	0	0	0	0	0	0	0	5.20414e-05	1	1	1	1	0	0	0	0	0	0	0	0	4	0	0	0	0
179	Bacteria	Chloroflexi	Dehalococcoidia	GIF9	AB-539-J10	SCGC-AB-539-J10	ASV_ 517	322	288	247	179	386	471	0	0	64	123	60	58	0.00150871	0.00164831	0.000788712	0.000695356	0.00151422	0.00183963	0	0	0.000203458	0.000411371	0.000163124	0.000155672	0.000744047	1	1	1	1	1	1	0	0	1	1	1	1	4	0	0	0	0
180	Bacteria	Chloroflexi	Anaerolineae	NA	NA	NA	ASV_ 518	178	106	255	190	424	149	24	35	43	42	65	40	0.000834009	0.000606671	0.000814257	0.000738088	0.00166329	0.000581963	7.71451e-05	9.5529e-05	0.000136698	0.000140468	0.000176717	0.00010736	0.000497683	1	1	1	1	1	1	0	0	1	1	1	1	4	0	0	0	0
181	Bacteria	Sva0485	NA	NA	NA	NA	ASV_ 528	67	78	49	39	73	69	60	106	211	215	107	106	0.000313925	0.000446418	0.000156465	0.000151502	0.000286368	0.0002695	0.000192863	0.000289316	0.000670774	0.000719064	0.000290904	0.000284504	0.0003393	1	1	1	1	1	1	1	1	1	1	1	1	4	0	0	0	0
182	Archaea	Crenarchaeota	Bathyarchaeia	NA	NA	NA	ASV_ 529	170	137	58	65	135	183	99	172	302	304	214	268	0.000796525	0.000784094	0.000185204	0.000252504	0.000529584	0.00071476	0.000318224	0.000469457	0.000960065	0.00101672	0.000581808	0.000719312	0.000610688	1	1	1	1	1	1	1	1	1	1	1	1	4	0	0	0	0
183	Archaea	Crenarchaeota	Bathyarchaeia	NA	NA	NA	ASV_ 537	42	21	118	95	27	37	139	212	226	206	118	162	0.000196789	0.00012019	0.000376793	0.000369044	0.000105917	0.000144514	0.000446799	0.000578633	0.000718459	0.000688963	0.00032081	0.000434808	0.000375143	1	1	1	1	1	1	1	1	1	1	1	1	4	0	0	0	0
184	Archaea	Crenarchaeota	Bathyarchaeia	NA	NA	NA	ASV_ 539	275	225	45	61	0	0	163	295	627	472	462	571	0.0012885	0.00128775	0.000143692	0.000236965	0	0	0.000523944	0.000805173	0.00199325	0.0015786	0.00125605	0.00153256	0.000887206	1	1	1	1	0	0	1	1	1	1	1	1	4	0	0	0	0
185	Bacteria	Verrucomicrobiota	Verrucomicrobiae	Pedosphaerales	Pedosphaeraceae	ADurb.Bin063-1	ASV_ 542	128	141	91	94	0	0	190	281	197	339	341	358	0.000599737	0.000806987	0.000290578	0.000365159	0	0	0.000610732	0.000766961	0.000626268	0.00113378	0.000927086	0.000960873	0.00059068	1	1	1	1	0	0	1	1	1	1	1	1	4	0	0	0	0
186	Archaea	Crenarchaeota	Nitrososphaeria	SCGC AB-179-E04	NA	NA	ASV_ 561	32	51	94	81	48	81	0	36	151	109	57	86	0.000149934	0.000291889	0.000300157	0.000314658	0.000188297	0.000316369	0	9.82584e-05	0.000480033	0.000364548	0.000154968	0.000230824	0.000240828	1	1	1	1	1	1	0	0	1	1	1	1	4	0	0	0	0
187	Bacteria	Planctomycetota	Planctomycetes	Isosphaerales	Isosphaeraceae	NA	ASV_ 573	90	26	41	39	275	20	16	0	5	11	596	199	0.00042169	0.000148806	0.00013092	0.000151502	0.00107878	7.81158e-05	5.14301e-05	0	1.58951e-05	3.67893e-05	0.00162036	0.000534116	0.000355701	1	1	1	1	1	0	0	0	0	0	1	1	4	0	0	0	0
188	Bacteria	Chloroflexi	Anaerolineae	ADurb.Bin180	NA	NA	ASV_ 58	467	288	554	406	205	155	4123	4582	3516	3700	2850	2383	0.0021881	0.00164831	0.00176901	0.00157718	0.000804183	0.000605398	0.0132529	0.0125061	0.0111774	0.0123746	0.00774838	0.00639598	0.00600396	1	1	1	1	1	1	1	1	1	1	1	1	4	0	0	0	0
189	Bacteria	Desulfobacterota	NA	NA	NA	NA	ASV_ 602	68	43	296	216	10	29	38	59	114	116	80	108	0.00031861	0.000246102	0.000945177	0.000839089	3.92285e-05	0.000113268	0.000122146	0.000161035	0.000362409	0.00038796	0.000217498	0.000289872	0.000336866	1	1	1	1	0	1	1	1	1	1	1	1	4	0	0	0	0
190	Archaea	Crenarchaeota	Bathyarchaeia	NA	NA	NA	ASV_ 624	219	186	62	44	119	139	86	135	294	292	207	280	0.00102611	0.00106454	0.000197976	0.000170926	0.000466819	0.000542905	0.000276437	0.000368469	0.000934633	0.000976589	0.000562777	0.00075152	0.000611641	1	1	1	1	1	1	1	1	1	1	1	1	4	0	0	0	0
191	Bacteria	Chloroflexi	Anaerolineae	RBG-13-54-9	NA	NA	ASV_ 629	29	27	229	169	65	84	133	178	300	274	299	171	0.000135878	0.000154529	0.000731235	0.00065651	0.000254985	0.000328087	0.000427513	0.000485833	0.000953707	0.000916388	0.0008129	0.000458964	0.000526377	1	1	1	1	1	1	1	1	1	1	1	1	4	0	0	0	0
192	Bacteria	Proteobacteria	Alphaproteobacteria	Rhizobiales	Hyphomicrobiaceae	NA	ASV_ 652	176	124	116	63	591	179	107	107	103	111	233	172	0.000824638	0.000709691	0.000370407	0.000244734	0.0023184	0.000699137	0.000343939	0.000292046	0.000327439	0.000371237	0.000633464	0.000461648	0.000633065	1	1	1	1	1	1	1	1	1	1	1	1	4	0	0	0	0
193	Bacteria	Chloroflexi	Anaerolineae	Caldilineales	Caldilineaceae	NA	ASV_ 661	111	38	277	192	367	53	0	0	107	81	153	100	0.000520084	0.000217486	0.000884506	0.000745857	0.00143968	0.000207007	0	0	0.000340156	0.000270903	0.000415965	0.0002684	0.000442504	1	1	1	1	1	1	0	0	1	1	1	1	4	0	0	0	0
194	Bacteria	Firmicutes	NA	NA	NA	NA	ASV_ 666	97	35	160	112	218	129	0	0	0	0	7	0	0.000454488	0.000200316	0.000510906	0.000435083	0.00085518	0.000503847	0	0	0	0	1.90311e-05	0	0.000248238	1	1	1	1	1	1	0	0	0	0	0	0	4	0	0	0	0
195	Bacteria	Chloroflexi	OLB14	NA	NA	NA	ASV_ 680	542	233	88	71	6	4	306	263	60	102	275	155	0.00253951	0.00133353	0.000280998	0.000275812	2.35371e-05	1.56232e-05	0.0009836	0.000717832	0.000190741	0.000341137	0.00074765	0.00041602	0.000655499	1	1	1	1	0	0	1	1	1	1	1	1	4	0	0	0	0
196	Bacteria	Desulfobacterota	NA	NA	NA	NA	ASV_ 683	67	59	202	156	60	120	0	0	0	28	15	45	0.000313925	0.000337675	0.000645019	0.000606009	0.000235371	0.000468695	0	0	0	9.36455e-05	4.07809e-05	0.00012078	0.000238492	1	1	1	1	1	1	0	0	0	0	0	1	4	0	0	0	0
197	Bacteria	Dadabacteria	Dadabacteriia	Dadabacteriales	NA	NA	ASV_ 685	68	58	202	176	160	94	153	190	164	202	157	173	0.00031861	0.000331952	0.000645019	0.000683702	0.000627655	0.000367144	0.0004918	0.000518586	0.00052136	0.000675585	0.00042684	0.000464332	0.000506049	1	1	1	1	1	1	1	1	1	1	1	1	4	0	0	0	0
198	Archaea	Crenarchaeota	Bathyarchaeia	NA	NA	NA	ASV_ 687	63	57	248	201	0	0	44	87	83	118	62	75	0.000295183	0.000326229	0.000791905	0.000780819	0	0	0.000141433	0.000237458	0.000263859	0.000394649	0.000168561	0.0002013	0.000300116	1	1	1	1	0	0	1	1	1	1	1	1	4	0	0	0	0
199	Archaea	Crenarchaeota	Bathyarchaeia	NA	NA	NA	ASV_ 688	41	24	232	184	0	0	0	96	0	0	48	0	0.000192103	0.000137359	0.000740814	0.00071478	0	0	0	0.000262022	0	0	0.000130499	0	0.000181465	1	1	1	1	0	0	0	1	0	0	1	0	4	0	0	0	0
200	Bacteria	Acidobacteriota	Subgroup 18	NA	NA	NA	ASV_ 697	82	36	193	148	53	62	71	83	242	286	344	251	0.000384206	0.000206039	0.000616281	0.000574931	0.000207911	0.000242159	0.000228221	0.00022654	0.000769324	0.000956522	0.000935243	0.000673684	0.000501755	1	1	1	1	1	1	1	1	1	1	1	1	4	0	0	0	0
201	Bacteria	Acidobacteriota	Acidobacteriae	NA	NA	NA	ASV_ 699	57	40	161	140	106	76	0	8	243	411	159	127	0.00026707	0.000228932	0.000514099	0.000543854	0.000415822	0.00029684	0	2.18352e-05	0.000772503	0.00137458	0.000432278	0.000340868	0.000434057	1	1	1	1	1	1	0	0	1	1	1	1	4	0	0	0	0
202	Bacteria	Chloroflexi	Dehalococcoidia	GIF9	NA	NA	ASV_ 707	39	36	183	117	0	55	0	0	91	100	36	114	0.000182732	0.000206039	0.000584349	0.000454507	0	0.000214819	0	0	0.000289291	0.000334448	9.78742e-05	0.000305976	0.000222503	1	1	1	1	0	1	0	0	1	1	0	1	4	0	0	0	0
203	Archaea	Crenarchaeota	Bathyarchaeia	NA	NA	NA	ASV_ 728	64	36	164	145	0	0	127	245	248	299	305	323	0.000299868	0.000206039	0.000523679	0.000563277	0	0	0.000408226	0.000668703	0.000788398	0.001	0.000829212	0.000866933	0.000512861	1	1	1	1	0	0	1	1	1	1	1	1	4	0	0	0	0
204	Archaea	Crenarchaeota	Bathyarchaeia	NA	NA	NA	ASV_ 744	82	68	249	198	0	0	53	100	88	102	72	71	0.000384206	0.000389185	0.000795098	0.000769165	0	0	0.000170362	0.00027294	0.000279754	0.000341137	0.000195748	0.000190564	0.00031568	1	1	1	1	0	0	1	1	1	1	1	1	4	0	0	0	0
205	Bacteria	Proteobacteria	Gammaproteobacteria	MBMPE27	NA	NA	ASV_ 75	147	86	1562	1159	858	1435	105	140	1230	1492	7819	4107	0.00068876	0.000492205	0.00498772	0.00450233	0.0033658	0.00560481	0.00033751	0.000382116	0.0039102	0.00498997	0.0212577	0.0110232	0.00512853	1	1	1	1	1	1	1	1	1	1	1	1	4	0	0	0	0
206	Bacteria	Desulfobacterota	Dissulfuribacteria	Dissulfuribacterales	Dissulfuribacteraceae	Dissulfurirhabdus	ASV_ 750	34	35	202	154	35	12	0	0	0	0	0	0	0.000159305	0.000200316	0.000645019	0.000598239	0.0001373	4.68695e-05	0	0	0	0	0	0	0.000148921	1	1	1	1	1	0	0	0	0	0	0	0	4	0	0	0	0
207	Bacteria	Caldatribacteriota	Caldatribacteriia	Caldatribacteriales	Caldatribacteriaceae	Candidatus Caldatribacterium	ASV_ 76	610	283	151	104	901	307	31	29	104	133	122	125	0.00285812	0.0016197	0.000482168	0.000404006	0.00353448	0.00119908	9.96458e-05	7.91526e-05	0.000330618	0.000444816	0.000331685	0.0003355	0.000976581	1	1	1	1	1	1	0	0	1	1	1	1	4	0	0	0	0
208	Bacteria	NA	NA	NA	NA	NA	ASV_ 760	81	32	61	53	32	37	9	13	48	81	34	71	0.000379521	0.000183146	0.000194783	0.000205888	0.000125531	0.000144514	2.89294e-05	3.54822e-05	0.000152593	0.000270903	9.24368e-05	0.000190564	0.000167024	1	1	1	1	1	1	0	0	1	1	0	1	4	0	0	0	0
209	Bacteria	Sumerlaeota	Sumerlaeia	NA	NA	NA	ASV_ 761	49	24	111	95	30	29	67	88	117	131	169	202	0.000229587	0.000137359	0.000354441	0.000369044	0.000117685	0.000113268	0.000215363	0.000240187	0.000371946	0.000438127	0.000459465	0.000542168	0.000299053	1	1	1	1	1	1	1	1	1	1	1	1	4	0	0	0	0
210	Bacteria	Proteobacteria	Gammaproteobacteria	PLTA13	NA	NA	ASV_ 762	71	44	69	34	105	84	0	0	0	0	155	109	0.000332666	0.000251826	0.000220328	0.000132079	0.000411899	0.000328087	0	0	0	0	0.000421403	0.000292556	0.000199237	1	1	1	1	1	1	0	0	0	0	1	1	4	0	0	0	0
211	Archaea	Crenarchaeota	Bathyarchaeia	NA	NA	NA	ASV_ 772	72	64	154	113	0	0	61	142	143	104	91	140	0.000337352	0.000366292	0.000491747	0.000438968	0	0	0.000196077	0.000387575	0.0004546	0.000347826	0.000247404	0.00037576	0.000303633	1	1	1	1	0	0	1	1	1	1	1	1	4	0	0	0	0
212	Bacteria	Desulfobacterota	Desulfobaccia	Desulfobaccales	Desulfobaccaceae	Desulfobacca	ASV_ 78	482	201	1222	802	746	288	746	889	1767	1768	3480	3091	0.00225838	0.00115039	0.00390205	0.00311551	0.00292644	0.00112487	0.00239793	0.00242644	0.00561733	0.00591304	0.00946118	0.00829625	0.00404915	1	1	1	1	1	1	1	1	1	1	1	1	4	0	0	0	0
213	Bacteria	Bacteroidota	Bacteroidia	Bacteroidales	Williamwhitmaniaceae	Blvii28 wastewater-sludge group	ASV_ 786	44	31	367	367	0	0	0	0	424	549	143	154	0.000206159	0.000177423	0.00117189	0.00142567	0	0	0	0	0.00134791	0.00183612	0.000388778	0.000413336	0.000580607	1	1	1	1	0	0	0	0	1	1	1	1	4	0	0	0	0
214	Bacteria	Chloroflexi	Anaerolineae	NA	NA	NA	ASV_ 806	48	63	250	142	187	46	115	140	187	198	163	110	0.000224901	0.000360569	0.000798291	0.000551623	0.000733572	0.000179666	0.000369654	0.000382116	0.000594477	0.000662207	0.000443153	0.00029524	0.000466289	1	1	1	1	1	1	1	1	1	1	1	1	4	0	0	0	0
215	Archaea	Crenarchaeota	Bathyarchaeia	NA	NA	NA	ASV_ 829	189	68	46	37	50	17	45	52	120	164	190	202	0.000885549	0.000389185	0.000146886	0.000143733	0.000196142	6.63985e-05	0.000144647	0.000141929	0.000381483	0.000548495	0.000516558	0.000542168	0.000341931	1	1	1	1	1	0	1	1	1	1	1	1	4	0	0	0	0
216	Bacteria	Nitrospirota	Thermodesulfovibrionia	NA	NA	NA	ASV_ 837	90	32	58	96	0	0	38	57	203	152	355	531	0.00042169	0.000183146	0.000185204	0.000372928	0	0	0.000122146	0.000155576	0.000645342	0.000508361	0.000965149	0.0014252	0.000415396	1	1	1	1	0	0	1	1	1	1	1	1	4	0	0	0	0
217	Bacteria	Proteobacteria	Gammaproteobacteria	Burkholderiales	Hydrogenophilaceae	Annwodia	ASV_ 85	117	102	515	399	6393	5582	585	920	288	237	132	148	0.000548197	0.000583778	0.00164448	0.00154998	0.0250788	0.0218021	0.00188041	0.00251105	0.000915559	0.000792642	0.000358872	0.000397232	0.00483859	1	1	1	1	1	1	1	1	1	1	1	1	4	0	0	0	0
218	Bacteria	Proteobacteria	Alphaproteobacteria	Rhizobiales	Methyloligellaceae	NA	ASV_ 864	151	93	50	52	60	18	99	116	281	380	237	153	0.000707502	0.000532268	0.000159658	0.000202003	0.000235371	7.03043e-05	0.000318224	0.00031661	0.000893306	0.0012709	0.000644339	0.000410652	0.000480095	1	1	1	1	1	0	1	1	1	1	1	1	4	0	0	0	0
219	Bacteria	Proteobacteria	Gammaproteobacteria	Burkholderiales	Hydrogenophilaceae	Thiobacter	ASV_ 865	76	75	113	110	24	23	166	287	17	15	47	27	0.000356094	0.000429248	0.000360828	0.000427314	9.41483e-05	8.98332e-05	0.000533587	0.000783338	5.40434e-05	5.01672e-05	0.00012778	7.2468e-05	0.000281571	1	1	1	1	0	0	1	1	0	0	1	0	4	0	0	0	0
220	Archaea	Crenarchaeota	Bathyarchaeia	NA	NA	NA	ASV_ 873	51	41	131	122	0	0	35	93	79	108	45	64	0.000238958	0.000234656	0.000418304	0.00047393	0	0	0.000112503	0.000253834	0.000251143	0.000361204	0.000122343	0.000171776	0.000219888	1	1	1	1	0	0	1	1	1	1	1	1	4	0	0	0	0
221	Archaea	Thermoplasmatota	Thermoplasmata	Marine Benthic Group D and DHVEG-1	NA	NA	ASV_ 88	687	728	570	561	487	1076	351	669	3013	2254	990	2182	0.0032189	0.00416657	0.0018201	0.0021793	0.00191043	0.00420263	0.00112825	0.00182597	0.0095784	0.00753846	0.00269154	0.00585649	0.00384309	1	1	1	1	1	1	1	1	1	1	1	1	4	0	0	0	0
222	Bacteria	Bacteroidota	Ignavibacteria	Ignavibacteriales	PHOS-HE36	NA	ASV_ 89	22	31	68	43	0	0	53	54	229	200	224	435	0.00010308	0.000177423	0.000217135	0.000167041	0	0	0.000170362	0.000147388	0.000727996	0.000668896	0.000608995	0.00116754	0.000346321	1	1	1	1	0	0	1	1	1	1	1	1	4	0	0	0	0
223	Bacteria	Chloroflexi	Anaerolineae	Anaerolineales	Anaerolineaceae	NA	ASV_ 90	292	210	1118	1133	384	445	387	647	1804	1823	1643	1510	0.00136815	0.0012019	0.00356996	0.00440133	0.00150637	0.00173808	0.00124397	0.00176592	0.00573496	0.00609699	0.00446687	0.00405284	0.00309561	1	1	1	1	1	1	1	1	1	1	1	1	4	0	0	0	0
224	Bacteria	Chloroflexi	Anaerolineae	SBR1031	NA	NA	ASV_ 910	108	28	384	206	358	160	18	35	79	97	175	104	0.000506028	0.000160253	0.00122618	0.000800242	0.00140438	0.000624927	5.78588e-05	9.5529e-05	0.000251143	0.000324415	0.000475777	0.000279136	0.000517155	1	1	1	1	1	1	0	0	1	1	1	1	4	0	0	0	0
225	Bacteria	Proteobacteria	Alphaproteobacteria	Rhodospirillales	Magnetospirillaceae	Phaeospirillum	ASV_ 936	225	241	135	115	130	178	0	0	5	5	9	0	0.00105422	0.00137932	0.000431077	0.000446737	0.00050997	0.000695231	0	0	1.58951e-05	1.67224e-05	2.44686e-05	0	0.000381137	1	1	1	1	1	1	0	0	0	0	0	0	4	0	0	0	0
226	Archaea	Crenarchaeota	Bathyarchaeia	NA	NA	NA	ASV_ 938	33	50	39	38	115	154	0	0	41	44	0	42	0.00015462	0.000286166	0.000124533	0.000147618	0.000451127	0.000601492	0	0	0.00013034	0.000147157	0	0.000112728	0.000179648	1	1	1	1	1	1	0	0	1	1	0	1	4	0	0	0	0
227	Bacteria	Bacteroidota	Ignavibacteria	Ignavibacteriales	Melioribacteraceae	Melioribacter	ASV_ 942	28	52	362	310	28	67	0	0	132	112	9	10	0.000131192	0.000297612	0.00115593	0.00120425	0.00010984	0.000261688	0	0	0.000419631	0.000374582	2.44686e-05	2.684e-05	0.000333836	1	1	1	1	1	1	0	0	1	1	0	0	4	0	0	0	0
228	Bacteria	Desulfobacterota	Syntrophobacteria	Syntrophobacterales	Syntrophobacteraceae	Desulfosoma	ASV_ 954	35	24	764	578	59	0	0	0	83	78	0	0	0.00016399	0.000137359	0.00243958	0.00224534	0.000231448	0	0	0	0.000263859	0.00026087	0	0	0.000478537	1	1	1	1	1	0	0	0	1	1	0	0	4	0	0	0	0
229	Bacteria	Acidobacteriota	Acidobacteriae	Bryobacterales	Bryobacteraceae	Bryobacter	ASV_ 999	51	52	112	101	19	29	0	27	0	0	0	0	0.000238958	0.000297612	0.000357634	0.000392352	7.45341e-05	0.000113268	0	7.36938e-05	0	0	0	0	0.000129004	1	1	1	1	0	1	0	0	0	0	0	0	4	0	0	0	0
230	Bacteria	Desulfobacterota	Desulfobacteria	Desulfatiglandales	Desulfatiglandaceae	Desulfatiglans	ASV_ 152	20	39	2455	2089	126	225	0	0	1420	1260	281	349	9.37089e-05	0.000223209	0.00783922	0.00811508	0.000494279	0.000878803	0	0	0.00451421	0.00421405	0.000763963	0.000936717	0.00233944	0	1	1	1	1	1	0	0	1	1	1	1	3	0	0	1	1
231	Bacteria	MBNT15	NA	NA	NA	NA	ASV_ 300	7	21	1498	1394	19	57	66	54	102	87	64	96	3.27981e-05	0.00012019	0.00478336	0.00541523	7.45341e-05	0.00022263	0.000212149	0.000147388	0.00032426	0.00029097	0.000173999	0.000257664	0.0010046	0	1	1	1	0	1	1	1	1	1	1	1	3	0	0	0	1
232	Bacteria	Chloroflexi	Anaerolineae	NA	NA	NA	ASV_ 1002	46	0	119	106	148	55	65	102	93	108	78	63	0.00021553	0	0.000379987	0.000411775	0.000580581	0.000214819	0.000208935	0.000278399	0.000295649	0.000361204	0.000212061	0.000169092	0.000277336	1	0	1	1	1	1	1	1	1	1	1	1	3	0	0	0	0
233	Bacteria	NA	NA	NA	NA	NA	ASV_ 1062	25	0	323	241	52	63	44	58	143	160	68	93	0.000117136	0	0.00103139	0.000936206	0.000203988	0.000246065	0.000141433	0.000158305	0.0004546	0.000535117	0.000184874	0.000249612	0.000354894	1	0	1	1	1	1	1	1	1	1	1	1	3	0	0	0	0
234	Bacteria	Chloroflexi	Anaerolineae	NA	NA	NA	ASV_ 1067	209	121	21	26	128	114	26	51	210	211	169	144	0.000979258	0.000692521	6.70564e-05	0.000101001	0.000502124	0.00044526	8.35739e-05	0.000139199	0.000667595	0.000705686	0.000459465	0.000386496	0.00043577	1	1	0	1	1	1	0	1	1	1	1	1	3	0	0	0	0
235	Archaea	Crenarchaeota	Bathyarchaeia	NA	NA	NA	ASV_ 1071	0	27	174	180	0	0	0	0	0	0	0	0	0	0.000154529	0.000555611	0.000699241	0	0	0	0	0	0	0	0	0.000117448	0	1	1	1	0	0	0	0	0	0	0	0	3	0	0	0	0
236	Archaea	Hadarchaeota	Hadarchaeia	Hadarchaeales	NA	NA	ASV_ 1076	29	0	408	458	122	138	0	0	73	57	45	0	0.000135878	0	0.00130281	0.00177918	0.000478587	0.000538999	0	0	0.000232069	0.000190635	0.000122343	0	0.000398375	1	0	1	1	1	1	0	0	1	1	1	0	3	0	0	0	0
237	Archaea	Crenarchaeota	Bathyarchaeia	NA	NA	NA	ASV_ 1097	41	0	87	76	106	63	0	0	27	33	0	0	0.000192103	0	0.000277805	0.000295235	0.000415822	0.000246065	0	0	8.58336e-05	0.000110368	0	0	0.000135269	1	0	1	1	1	1	0	0	0	1	0	0	3	0	0	0	0
238	Bacteria	Nitrospirota	Thermodesulfovibrionia	NA	NA	NA	ASV_ 1099	0	22	583	473	71	239	0	0	0	0	0	0	0	0.000125913	0.00186161	0.00183745	0.000278522	0.000933484	0	0	0	0	0	0	0.000419749	0	1	1	1	1	1	0	0	0	0	0	0	3	0	0	0	0
239	Archaea	Asgardarchaeota	Odinarchaeia	NA	NA	NA	ASV_ 1108	54	0	114	72	60	20	0	82	172	172	123	142	0.000253014	0	0.000364021	0.000279696	0.000235371	7.81158e-05	0	0.000223811	0.000546792	0.000575251	0.000334404	0.000381128	0.000272634	1	0	1	1	1	0	0	1	1	1	1	1	3	0	0	0	0
240	Bacteria	Planctomycetota	NA	NA	NA	NA	ASV_ 1117	21	18	165	141	16	31	34	67	53	44	31	49	9.83943e-05	0.00010302	0.000526872	0.000547739	6.27655e-05	0.00012108	0.000109289	0.00018287	0.000168488	0.000147157	8.42806e-05	0.000131516	0.000190289	0	1	1	1	0	1	1	1	1	1	0	1	3	0	0	0	0
241	Bacteria	NA	NA	NA	NA	NA	ASV_ 1141	15	18	184	180	20	51	0	0	46	19	28	19	7.02816e-05	0.00010302	0.000587542	0.000699241	7.84569e-05	0.000199195	0	0	0.000146235	6.35452e-05	7.61244e-05	5.0996e-05	0.000172886	0	1	1	1	0	1	0	0	1	0	0	0	3	0	0	0	0
242	Archaea	Asgardarchaeota	Odinarchaeia	NA	NA	NA	ASV_ 1170	0	22	71	84	0	0	47	0	0	74	0	58	0	0.000125913	0.000226715	0.000326312	0	0	0.000151076	0	0	0.000247492	0	0.000155672	0.000102765	0	1	1	1	0	0	1	0	0	1	0	1	3	0	0	0	0
243	Bacteria	Acetothermia	Acetothermiia	NA	NA	NA	ASV_ 1184	152	75	139	0	238	231	0	0	119	210	105	0	0.000712187	0.000429248	0.00044385	0	0.000933637	0.000902238	0	0	0.000378304	0.000702341	0.000285466	0	0.000398939	1	1	1	0	1	1	0	0	1	1	1	0	3	0	0	0	0
244	Bacteria	Proteobacteria	Gammaproteobacteria	NA	NA	NA	ASV_ 122	424	437	38	25	1606	1557	177	232	419	364	1127	1106	0.00198663	0.00250109	0.00012134	9.71168e-05	0.00630009	0.00608132	0.000568945	0.000633221	0.00133201	0.00121739	0.00306401	0.00296851	0.00223931	1	1	1	0	1	1	1	1	1	1	1	1	3	0	0	0	0
245	Bacteria	Chloroflexi	Anaerolineae	SBR1031	NA	NA	ASV_ 1258	61	16	53	38	12	5	9	10	86	111	215	119	0.000285812	9.1573e-05	0.000169238	0.000147618	4.70741e-05	1.9529e-05	2.89294e-05	2.7294e-05	0.000273396	0.000371237	0.000584527	0.000319396	0.000197135	1	0	1	1	0	0	0	0	1	1	1	1	3	0	0	0	0
246	Bacteria	Desulfobacterota	Desulfobaccia	Desulfobaccales	Desulfobaccaceae	Desulfobacca	ASV_ 1268	45	0	159	114	0	0	69	75	107	111	157	145	0.000210845	0	0.000507713	0.000442853	0	0	0.000221792	0.000204705	0.000340156	0.000371237	0.00042684	0.00038918	0.00025961	1	0	1	1	0	0	1	1	1	1	1	1	3	0	0	0	0
247	Bacteria	Acidobacteriota	Subgroup 21	NA	NA	NA	ASV_ 1317	29	43	31	33	18	19	0	0	0	0	0	18	0.000135878	0.000246102	9.89881e-05	0.000128194	7.06112e-05	7.42101e-05	0	0	0	0	0	4.8312e-05	6.6858e-05	1	1	0	1	0	0	0	0	0	0	0	0	3	0	0	0	0
248	Bacteria	Chloroflexi	Anaerolineae	SBR1031	NA	NA	ASV_ 1338	45	15	317	210	140	0	14	0	64	79	144	73	0.000210845	8.58497e-05	0.00101223	0.000815781	0.000549198	0	4.50013e-05	0	0.000203458	0.000264214	0.000391497	0.000195932	0.000314501	1	0	1	1	1	0	0	0	1	1	1	1	3	0	0	0	0
249	Bacteria	WS1	NA	NA	NA	NA	ASV_ 1340	20	20	89	63	37	11	0	0	25	16	64	41	9.37089e-05	0.000114466	0.000284192	0.000244734	0.000145145	4.29637e-05	0	0	7.94756e-05	5.35117e-05	0.000173999	0.000110044	0.000111853	0	1	1	1	1	0	0	0	0	0	1	1	3	0	0	0	0
250	Bacteria	Proteobacteria	Alphaproteobacteria	Rhizobiales	Hyphomicrobiaceae	Hyphomicrobium	ASV_ 1372	80	31	40	0	109	0	85	62	88	120	153	97	0.000374835	0.000177423	0.000127727	0	0.00042759	0	0.000273222	0.000169223	0.000279754	0.000401338	0.000415965	0.000260348	0.000242285	1	1	1	0	1	0	1	1	1	1	1	1	3	0	0	0	0
251	Bacteria	Chloroflexi	Anaerolineae	Anaerolineales	Anaerolineaceae	Ornatilinea	ASV_ 1438	21	20	198	141	46	42	9	20	64	63	35	30	9.83943e-05	0.000114466	0.000632246	0.000547739	0.000180451	0.000164043	2.89294e-05	5.4588e-05	0.000203458	0.000210702	9.51555e-05	8.05201e-05	0.000200891	0	1	1	1	1	1	0	0	1	1	0	0	3	0	0	0	0
252	Bacteria	NA	NA	NA	NA	NA	ASV_ 1461	24	12	166	263	112	265	0	0	0	0	0	0	0.000112451	6.86797e-05	0.000530065	0.00102167	0.000439359	0.00103503	0	0	0	0	0	0	0.000267271	1	0	1	1	1	1	0	0	0	0	0	0	3	0	0	0	0
253	Bacteria	Nitrospirota	Thermodesulfovibrionia	NA	NA	NA	ASV_ 1491	0	33	136	79	0	149	0	0	0	45	195	306	0	0.000188869	0.00043427	0.000306889	0	0.000581963	0	0	0	0.000150502	0.000530152	0.000821305	0.000251163	0	1	1	1	0	1	0	0	0	1	1	1	3	0	0	0	0
254	Bacteria	Armatimonadota	DG-56	NA	NA	NA	ASV_ 1544	90	47	0	47	46	14	62	66	80	95	68	73	0.00042169	0.000268996	0	0.00018258	0.000180451	5.46811e-05	0.000199292	0.00018014	0.000254322	0.000317726	0.000184874	0.000195932	0.00020339	1	1	0	1	1	0	1	1	1	1	1	1	3	0	0	0	0
255	Bacteria	Planctomycetota	NA	NA	NA	NA	ASV_ 1608	23	7	98	63	4	4	11	18	29	28	134	155	0.000107765	4.00632e-05	0.00031293	0.000244734	1.56914e-05	1.56232e-05	3.53582e-05	4.91292e-05	9.21917e-05	9.36455e-05	0.00036431	0.00041602	0.000148955	1	0	1	1	0	0	0	0	0	0	1	1	3	0	0	0	0
256	Archaea	Crenarchaeota	Bathyarchaeia	NA	NA	NA	ASV_ 1621	34	43	26	34	0	0	0	0	96	68	45	91	0.000159305	0.000246102	8.30223e-05	0.000132079	0	0	0	0	0.000305186	0.000227425	0.000122343	0.000244244	0.000126642	1	1	0	1	0	0	0	0	1	1	1	1	3	0	0	0	0
257	Bacteria	NA	NA	NA	NA	NA	ASV_ 1654	18	36	185	146	26	36	0	0	0	33	28	17	8.4338e-05	0.000206039	0.000590735	0.000567162	0.000101994	0.000140609	0	0	0	0.000110368	7.61244e-05	4.5628e-05	0.00016025	0	1	1	1	1	1	0	0	0	1	0	0	3	0	0	0	0
258	Archaea	Crenarchaeota	Bathyarchaeia	NA	NA	NA	ASV_ 1721	86	56	37	0	0	0	46	79	83	127	89	72	0.000402948	0.000320505	0.000118147	0	0	0	0.000147861	0.000215623	0.000263859	0.000424749	0.000241967	0.000193248	0.000194076	1	1	1	0	0	0	1	1	1	1	1	1	3	0	0	0	0
259	Archaea	Hadarchaeota	Hadarchaeia	Hadarchaeales	NA	NA	ASV_ 1800	20	23	48	50	46	24	5	11	72	77	60	58	9.37089e-05	0.000131636	0.000153272	0.000194234	0.000180451	9.3739e-05	1.60719e-05	3.00234e-05	0.00022889	0.000257525	0.000163124	0.000155672	0.000141529	0	1	1	1	1	0	0	0	1	1	1	1	3	0	0	0	0
260	Archaea	Crenarchaeota	Bathyarchaeia	NA	NA	NA	ASV_ 2014	53	25	34	13	0	0	0	18	30	43	0	50	0.000248328	0.000143083	0.000108568	5.05007e-05	0	0	0	4.91292e-05	9.53707e-05	0.000143813	0	0.0001342	8.10827e-05	1	1	1	0	0	0	0	0	0	1	0	1	3	0	0	0	0
261	Bacteria	Chloroflexi	Anaerolineae	SBR1031	NA	NA	ASV_ 202	33	0	47	38	26	0	944	1083	421	449	745	434	0.00015462	0	0.000150079	0.000147618	0.000101994	0	0.00303437	0.00295594	0.00133837	0.00150167	0.00202545	0.00116486	0.00104791	1	0	1	1	1	0	1	1	1	1	1	1	3	0	0	0	0
262	Bacteria	Spirochaetota	Leptospirae	Leptospirales	Leptospiraceae	Turneriella	ASV_ 205	29	26	33	13	180	187	60	78	0	0	492	724	0.000135878	0.000148806	0.000105374	5.05007e-05	0.000706112	0.000730383	0.000192863	0.000212893	0	0	0.00133761	0.00194322	0.000463637	1	1	1	0	1	1	1	1	0	0	1	1	3	0	0	0	0
263	Bacteria	Chloroflexi	Anaerolineae	RBG-13-54-9	NA	NA	ASV_ 2074	24	0	47	38	17	0	0	0	0	0	0	0	0.000112451	0	0.000150079	0.000147618	6.66884e-05	0	0	0	0	0	0	0	3.97363e-05	1	0	1	1	0	0	0	0	0	0	0	0	3	0	0	0	0
264	Bacteria	Proteobacteria	Gammaproteobacteria	Burkholderiales	Sutterellaceae	NA	ASV_ 216	193	149	32	0	13	0	894	763	406	563	993	675	0.00090429	0.000852774	0.000102181	0	5.0997e-05	0	0.00287366	0.00208253	0.00129068	0.00188294	0.0026997	0.0018117	0.00121262	1	1	1	0	0	0	1	1	1	1	1	1	3	0	0	0	0
265	Bacteria	Proteobacteria	Alphaproteobacteria	Rhizobiales	Hyphomicrobiaceae	Hyphomicrobium	ASV_ 2275	149	73	51	0	0	0	0	0	0	0	0	0	0.000698131	0.000417802	0.000162851	0	0	0	0	0	0	0	0	0	0.000106565	1	1	1	0	0	0	0	0	0	0	0	0	3	0	0	0	0
266	Bacteria	Acidobacteriota	Aminicenantia	Aminicenantales	NA	NA	ASV_ 228	90	0	288	242	163	149	133	168	502	552	202	329	0.00042169	0	0.000919631	0.000940091	0.000639424	0.000581963	0.000427513	0.000458539	0.00159587	0.00184615	0.000549183	0.000883037	0.000771924	1	0	1	1	1	1	1	1	1	1	1	1	3	0	0	0	0
267	Archaea	Crenarchaeota	Bathyarchaeia	NA	NA	NA	ASV_ 2283	29	0	48	60	0	0	0	25	51	38	42	48	0.000135878	0	0.000153272	0.00023308	0	0	0	6.8235e-05	0.00016213	0.00012709	0.000114187	0.000128832	9.35587e-05	1	0	1	1	0	0	0	0	1	1	1	1	3	0	0	0	0
268	Bacteria	Deferrisomatota	Defferrisomatia	Defferrisomatales	Defferrisomataceae	Deferrisoma	ASV_ 2328	29	19	41	23	41	136	8	0	18	31	58	49	0.000135878	0.000108743	0.00013092	8.93475e-05	0.000160837	0.000531188	2.5715e-05	0	5.72224e-05	0.000103679	0.000157686	0.000131516	0.000136061	1	1	1	0	1	1	0	0	0	1	1	1	3	0	0	0	0
269	Bacteria	Verrucomicrobiota	Verrucomicrobiae	Pedosphaerales	Pedosphaeraceae	NA	ASV_ 260	74	88	36	18	32	56	0	0	419	371	922	1132	0.000346723	0.000503651	0.000114954	6.99241e-05	0.000125531	0.000218724	0	0	0.00133201	0.0012408	0.00250667	0.00303829	0.00079144	1	1	1	0	1	1	0	0	1	1	1	1	3	0	0	0	0
270	Archaea	Crenarchaeota	Bathyarchaeia	NA	NA	NA	ASV_ 279	432	315	0	54	206	230	215	400	745	719	477	711	0.00202411	0.00180284	0	0.000209772	0.000808106	0.000898332	0.000691092	0.00109176	0.00236837	0.00240468	0.00129683	0.00190833	0.00129202	1	1	0	1	1	1	1	1	1	1	1	1	3	0	0	0	0
271	Bacteria	Desulfobacterota	Syntrophorhabdia	Syntrophorhabdales	Syntrophorhabdaceae	Syntrophorhabdus	ASV_ 2887	13	18	41	38	0	0	31	38	19	27	20	31	6.09108e-05	0.00010302	0.00013092	0.000147618	0	0	9.96458e-05	0.000103717	6.04014e-05	9.0301e-05	5.43746e-05	8.32041e-05	7.78426e-05	0	1	1	1	0	0	0	1	0	0	0	0	3	0	0	0	0
272	Bacteria	Planctomycetota	Planctomycetes	Planctomycetales	Rubinisphaeraceae	Planctomicrobium	ASV_ 290	98	52	50	22	212	32	406	335	32	70	279	195	0.000459173	0.000297612	0.000159658	8.54628e-05	0.000831643	0.000124985	0.00130504	0.000914349	0.000101729	0.000234114	0.000758525	0.00052338	0.000482973	1	1	1	0	1	1	1	1	1	1	1	1	3	0	0	0	0
273	Bacteria	Proteobacteria	Gammaproteobacteria	PLTA13	NA	NA	ASV_ 307	122	113	65	0	417	257	119	137	134	192	0	0	0.000571624	0.000646734	0.000207556	0	0.00163583	0.00100379	0.000382511	0.000373928	0.000425989	0.00064214	0	0	0.000490841	1	1	1	0	1	1	1	1	1	1	0	0	3	0	0	0	0
274	Bacteria	Proteobacteria	Alphaproteobacteria	NA	NA	NA	ASV_ 330	11	23	217	222	16	18	184	78	351	118	48	30	5.15399e-05	0.000131636	0.000692917	0.000862397	6.27655e-05	7.03043e-05	0.000591446	0.000212893	0.00111584	0.000394649	0.000130499	8.05201e-05	0.00036645	0	1	1	1	0	0	1	1	1	1	1	0	3	0	0	0	0
275	Bacteria	Deferribacterota	Deferribacteres	Deferribacterales	Deferribacteraceae	NA	ASV_ 339	121	122	57	0	851	766	0	0	0	0	0	0	0.000566939	0.000698244	0.00018201	0	0.00333834	0.00299184	0	0	0	0	0	0	0.000648114	1	1	1	0	1	1	0	0	0	0	0	0	3	0	0	0	0
276	Archaea	Crenarchaeota	Bathyarchaeia	NA	NA	NA	ASV_ 341	34	0	594	502	0	0	0	0	0	0	0	0	0.000159305	0	0.00189674	0.00195011	0	0	0	0	0	0	0	0	0.000333846	1	0	1	1	0	0	0	0	0	0	0	0	3	0	0	0	0
277	Archaea	Crenarchaeota	Bathyarchaeia	NA	NA	NA	ASV_ 3443	47	40	31	30	25	26	0	0	0	0	31	58	0.000220216	0.000228932	9.89881e-05	0.00011654	9.80711e-05	0.000101551	0	0	0	0	8.42806e-05	0.000155672	9.20209e-05	1	1	0	1	0	1	0	0	0	0	0	1	3	0	0	0	0
278	Bacteria	Proteobacteria	Alphaproteobacteria	Tistrellales	Geminicoccaceae	Candidatus Alysiosphaera	ASV_ 349	34	9	193	140	45	111	196	113	80	78	174	83	0.000159305	5.15098e-05	0.000616281	0.000543854	0.000176528	0.000433543	0.000630018	0.000308422	0.000254322	0.00026087	0.000473059	0.000222772	0.000344207	1	0	1	1	1	1	1	1	1	1	1	1	3	0	0	0	0
279	Archaea	Crenarchaeota	Bathyarchaeia	NA	NA	NA	ASV_ 353	56	38	86	20	123	109	0	0	0	0	0	0	0.000262385	0.000217486	0.000274612	7.76934e-05	0.00048251	0.000425731	0	0	0	0	0	0	0.000145035	1	1	1	0	1	1	0	0	0	0	0	0	3	0	0	0	0
280	Bacteria	NA	NA	NA	NA	NA	ASV_ 358	28	17	872	818	179	617	6	7	336	246	41	121	0.000131192	9.72963e-05	0.00278444	0.00317766	0.000702189	0.00240987	1.92863e-05	1.91058e-05	0.00106815	0.000822742	0.000111468	0.000324764	0.000972348	1	0	1	1	1	1	0	0	1	1	1	1	3	0	0	0	0
281	Archaea	Crenarchaeota	Bathyarchaeia	NA	NA	NA	ASV_ 374	194	186	0	80	143	152	0	0	307	292	169	339	0.000908976	0.00106454	0	0.000310774	0.000560967	0.00059368	0	0	0.00097596	0.000976589	0.000459465	0.000909877	0.000563402	1	1	0	1	1	1	0	0	1	1	1	1	3	0	0	0	0
282	Bacteria	Proteobacteria	Gammaproteobacteria	Burkholderiales	Nitrosomonadaceae	mle1-7	ASV_ 3744	83	82	24	27	0	0	0	0	0	0	0	0	0.000388892	0.000469312	7.66359e-05	0.000104886	0	0	0	0	0	0	0	0	8.66438e-05	1	1	0	1	0	0	0	0	0	0	0	0	3	0	0	0	0
283	Bacteria	Sva0485	NA	NA	NA	NA	ASV_ 3946	39	47	2	32	32	51	0	0	13	18	0	0	0.000182732	0.000268996	6.38633e-06	0.000124309	0.000125531	0.000199195	0	0	4.13273e-05	6.02007e-05	0	0	8.40565e-05	1	1	0	1	1	1	0	0	0	0	0	0	3	0	0	0	0
284	Bacteria	Armatimonadota	Chthonomonadetes	Chthonomonadales	NA	NA	ASV_ 401	14	18	81	70	0	0	0	0	139	170	468	396	6.55962e-05	0.00010302	0.000258646	0.000271927	0	0	0	0	0.000441884	0.000568562	0.00127236	0.00106286	0.000337072	0	1	1	1	0	0	0	0	1	1	1	1	3	0	0	0	0
285	Archaea	Crenarchaeota	Bathyarchaeia	NA	NA	NA	ASV_ 411	222	262	90	0	124	114	0	0	219	159	115	162	0.00104017	0.00149951	0.000287385	0	0.000486433	0.00044526	0	0	0.000696206	0.000531773	0.000312654	0.000434808	0.00047785	1	1	1	0	1	1	0	0	1	1	1	1	3	0	0	0	0
286	Bacteria	Chloroflexi	Anaerolineae	Thermoflexales	Thermoflexaceae	Thermoflexus	ASV_ 4250	34	26	32	0	0	0	14	0	28	28	32	13	0.000159305	0.000148806	0.000102181	0	0	0	4.50013e-05	0	8.90127e-05	9.36455e-05	8.69993e-05	3.4892e-05	6.33203e-05	1	1	1	0	0	0	0	0	0	0	0	0	3	0	0	0	0
287	Bacteria	Chloroflexi	Anaerolineae	NA	NA	NA	ASV_ 4407	24	12	65	29	20	32	3	5	0	5	0	0	0.000112451	6.86797e-05	0.000207556	0.000112655	7.84569e-05	0.000124985	9.64314e-06	1.3647e-05	0	1.67224e-05	0	0	6.20664e-05	1	0	1	1	0	1	0	0	0	0	0	0	3	0	0	0	0
288	Bacteria	TA06	NA	NA	NA	NA	ASV_ 472	128	102	37	21	206	176	67	129	313	339	153	187	0.000599737	0.000583778	0.000118147	8.15781e-05	0.000808106	0.000687419	0.000215363	0.000352092	0.000995034	0.00113378	0.000415965	0.000501908	0.000541076	1	1	1	0	1	1	1	1	1	1	1	1	3	0	0	0	0
289	Bacteria	Bacteroidota	Kapabacteria	Kapabacteriales	NA	NA	ASV_ 476	19	22	358	276	183	271	0	0	302	363	53	92	8.90234e-05	0.000125913	0.00114315	0.00107217	0.000717881	0.00105847	0	0	0.000960065	0.00121405	0.000144093	0.000246928	0.000564312	0	1	1	1	1	1	0	0	1	1	1	1	3	0	0	0	0
290	Bacteria	Acidobacteriota	Aminicenantia	Aminicenantales	NA	NA	ASV_ 481	65	0	659	474	211	312	0	0	0	0	0	0	0.000304554	0	0.0021043	0.00184133	0.00082772	0.00121861	0	0	0	0	0	0	0.000524709	1	0	1	1	1	1	0	0	0	0	0	0	3	0	0	0	0
291	Archaea	Crenarchaeota	Bathyarchaeia	NA	NA	NA	ASV_ 531	49	0	110	80	0	0	0	0	0	0	0	0	0.000229587	0	0.000351248	0.000310774	0	0	0	0	0	0	0	0	7.43007e-05	1	0	1	1	0	0	0	0	0	0	0	0	3	0	0	0	0
292	Bacteria	Sva0485	NA	NA	NA	NA	ASV_ 557	0	19	703	690	17	31	0	0	287	307	134	181	0	0.000108743	0.00224479	0.00268042	6.66884e-05	0.00012108	0	0	0.00091238	0.00102676	0.00036431	0.000485804	0.000667582	0	1	1	1	0	1	0	0	1	1	1	1	3	0	0	0	0
293	Archaea	Crenarchaeota	Bathyarchaeia	NA	NA	NA	ASV_ 562	18	25	129	82	0	0	19	7	5	6	1	6	8.4338e-05	0.000143083	0.000411918	0.000318543	0	0	6.10732e-05	1.91058e-05	1.58951e-05	2.00669e-05	2.71873e-06	1.6104e-05	9.10705e-05	0	1	1	1	0	0	0	0	0	0	0	0	3	0	0	0	0
294	Archaea	Euryarchaeota	Thermococci	Methanofastidiosales	NA	NA	ASV_ 564	174	168	24	28	85	138	44	77	428	373	255	214	0.000815267	0.000961516	7.66359e-05	0.000108771	0.000333442	0.000538999	0.000141433	0.000210164	0.00136062	0.00124749	0.000693276	0.000574376	0.000588499	1	1	0	1	1	1	1	1	1	1	1	1	3	0	0	0	0
295	Archaea	Crenarchaeota	Bathyarchaeia	NA	NA	NA	ASV_ 574	131	0	82	98	0	0	92	151	218	244	212	209	0.000613793	0	0.000261839	0.000380698	0	0	0.000295723	0.000412139	0.000693027	0.000816054	0.00057637	0.000560956	0.000384217	1	0	1	1	0	0	1	1	1	1	1	1	3	0	0	0	0
296	Bacteria	Hydrothermae	NA	NA	NA	NA	ASV_ 579	27	32	29	27	396	1099	0	0	0	0	0	0	0.000126507	0.000183146	9.26018e-05	0.000104886	0.00155345	0.00429247	0	0	0	0	0	0	0.000529421	1	1	0	1	1	1	0	0	0	0	0	0	3	0	0	0	0
297	Bacteria	Deinococcota	Deinococci	Thermales	Thermaceae	Thermus	ASV_ 580	152	83	56	0	468	436	14	0	76	68	57	45	0.000712187	0.000475035	0.000178817	0	0.00183589	0.00170293	4.50013e-05	0	0.000241606	0.000227425	0.000154968	0.00012078	0.000474553	1	1	1	0	1	1	0	0	1	1	1	1	3	0	0	0	0
298	Bacteria	Sva0485	NA	NA	NA	NA	ASV_ 584	0	61	183	149	39	59	83	127	162	181	151	206	0	0.000349122	0.000584349	0.000578816	0.000152991	0.000230442	0.000266794	0.000346634	0.000515002	0.000605351	0.000410528	0.000552904	0.000382744	0	1	1	1	1	1	1	1	1	1	1	1	3	0	0	0	0
299	Bacteria	Proteobacteria	Alphaproteobacteria	Rhizobiales	Xanthobacteraceae	Pseudorhodoplanes	ASV_ 626	72	61	46	22	410	158	160	84	0	0	115	89	0.000337352	0.000349122	0.000146886	8.54628e-05	0.00160837	0.000617115	0.000514301	0.00022927	0	0	0.000312654	0.000238876	0.00036995	1	1	1	0	1	1	1	1	0	0	1	1	3	0	0	0	0
300	Bacteria	Acidobacteriota	Aminicenantia	Aminicenantales	NA	NA	ASV_ 650	87	0	329	259	136	113	0	81	241	231	83	156	0.000407634	0	0.00105055	0.00100613	0.000533507	0.000441355	0	0.000221081	0.000766145	0.000772575	0.000225654	0.000418704	0.000486945	1	0	1	1	1	1	0	1	1	1	1	1	3	0	0	0	0
301	Bacteria	Proteobacteria	Gammaproteobacteria	MBMPE27	NA	NA	ASV_ 684	27	12	920	603	52	64	15	18	6	12	478	221	0.000126507	6.86797e-05	0.00293771	0.00234246	0.000203988	0.000249971	4.82157e-05	4.91292e-05	1.90741e-05	4.01338e-05	0.00129955	0.000593164	0.000664882	1	0	1	1	1	1	0	0	0	0	1	1	3	0	0	0	0
302	Bacteria	NA	NA	NA	NA	NA	ASV_ 719	80	97	30	32	19	156	70	89	101	69	319	500	0.000374835	0.000555161	9.57949e-05	0.000124309	7.45341e-05	0.000609304	0.000225007	0.000242917	0.000321081	0.000230769	0.000867274	0.001342	0.000421916	1	1	0	1	0	1	1	1	1	1	1	1	3	0	0	0	0
303	Archaea	Crenarchaeota	Bathyarchaeia	NA	NA	NA	ASV_ 756	20	19	164	121	20	0	0	0	0	0	0	0	9.37089e-05	0.000108743	0.000523679	0.000470045	7.84569e-05	0	0	0	0	0	0	0	0.000106219	0	1	1	1	0	0	0	0	0	0	0	0	3	0	0	0	0
304	Bacteria	Proteobacteria	Gammaproteobacteria	NA	NA	NA	ASV_ 805	55	80	28	34	185	196	13	6	0	0	139	169	0.000257699	0.000457865	8.94086e-05	0.000132079	0.000725726	0.000765535	4.17869e-05	1.63764e-05	0	0	0.000377903	0.000453596	0.000276498	1	1	0	1	1	1	0	0	0	0	1	1	3	0	0	0	0
305	Bacteria	Chloroflexi	OLB14	NA	NA	NA	ASV_ 809	29	9	166	112	304	121	141	99	0	22	9	0	0.000135878	5.15098e-05	0.000530065	0.000435083	0.00119255	0.000472601	0.000453228	0.000270211	0	7.35786e-05	2.44686e-05	0	0.000303264	1	0	1	1	1	1	1	1	0	0	0	0	3	0	0	0	0
306	Bacteria	Proteobacteria	Gammaproteobacteria	Halothiobacillales	Halothiobacillaceae	Thiofaba	ASV_ 831	0	27	72	40	246	146	0	0	125	147	0	0	0	0.000154529	0.000229908	0.000155387	0.00096502	0.000570246	0	0	0.000397378	0.000491639	0	0	0.000247009	0	1	1	1	1	1	0	0	1	1	0	0	3	0	0	0	0
307	Bacteria	Planctomycetota	Planctomycetes	Pirellulales	Pirellulaceae	NA	ASV_ 882	28	0	157	120	27	0	45	54	138	83	544	468	0.000131192	0	0.000501327	0.000466161	0.000105917	0	0.000144647	0.000147388	0.000438705	0.000277592	0.00147899	0.00125611	0.000412336	1	0	1	1	1	0	1	1	1	1	1	1	3	0	0	0	0
308	Bacteria	Proteobacteria	Gammaproteobacteria	Burkholderiales	Nitrosomonadaceae	NA	ASV_ 909	11	28	886	718	56	54	0	0	0	0	0	0	5.15399e-05	0.000160253	0.00282914	0.00278919	0.000219679	0.000210913	0	0	0	0	0	0	0.000521727	0	1	1	1	1	1	0	0	0	0	0	0	3	0	0	0	0
309	Archaea	Crenarchaeota	Bathyarchaeia	NA	NA	NA	ASV_ 975	23	0	40	32	0	0	26	39	0	0	0	0	0.000107765	0	0.000127727	0.000124309	0	0	8.35739e-05	0.000106447	0	0	0	0	4.58185e-05	1	0	1	1	0	0	0	1	0	0	0	0	3	0	0	0	0
310	Bacteria	Chloroflexi	Anaerolineae	MSB-5E12	NA	NA	ASV_ 992	39	10	40	26	74	17	47	61	53	27	84	60	0.000182732	5.72331e-05	0.000127727	0.000101001	0.000290291	6.63985e-05	0.000151076	0.000166493	0.000168488	9.0301e-05	0.000228373	0.00016104	0.000149263	1	0	1	1	1	0	1	1	1	0	1	1	3	0	0	0	0
311	Bacteria	Planctomycetota	Phycisphaerae	Phycisphaerales	Phycisphaeraceae	SM1A02	ASV_ 206	1222	1168	17	15	5	9	1723	1292	199	202	420	479	0.00572561	0.00668483	5.42838e-05	5.82701e-05	1.96142e-05	3.51521e-05	0.00553838	0.00352638	0.000632626	0.000675585	0.00114187	0.00128564	0.00211485	1	1	0	0	0	0	1	1	1	1	1	1	2	1	1	0	0
312	Bacteria	Chloroflexi	Chloroflexia	Chloroflexales	Chloroflexaceae	Chloroflexus	ASV_ 23	0	0	2268	2558	786	503	366	379	515	467	87	111	0	0	0.0072421	0.00993699	0.00308336	0.00196461	0.00117646	0.00103444	0.0016372	0.00156187	0.000236529	0.000297924	0.00234762	0	0	1	1	1	1	1	1	1	1	1	1	2	0	0	1	1
313	Bacteria	Proteobacteria	Gammaproteobacteria	Burkholderiales	NA	NA	ASV_ 233	0	0	3793	3567	0	0	0	0	0	0	0	0	0	0	0.0121117	0.0138566	0	0	0	0	0	0	0	0	0.00216402	0	0	1	1	0	0	0	0	0	0	0	0	2	0	0	1	1
314	Bacteria	Proteobacteria	Gammaproteobacteria	Burkholderiales	NA	NA	ASV_ 243	0	0	3755	3410	0	0	0	0	0	0	0	0	0	0	0.0119903	0.0132467	0	0	0	0	0	0	0	0	0.00210309	0	0	1	1	0	0	0	0	0	0	0	0	2	0	0	1	1
315	Bacteria	Cyanobacteria	Cyanobacteria	Cyanobacteriales	Nostocaceae	Chlorogloeopsis PCC-7518	ASV_ 261	0	0	2002	1984	0	0	0	0	6	9	0	9	0	0	0.00639271	0.00770719	0	0	0	0	1.90741e-05	3.01003e-05	0	2.4156e-05	0.0011811	0	0	1	1	0	0	0	0	0	0	0	0	2	0	0	1	1
316	Bacteria	Gemmatimonadota	BD2-11 terrestrial group	NA	NA	NA	ASV_ 280	1590	1443	0	0	12	0	206	312	0	0	581	406	0.00744985	0.00825874	0	0	4.70741e-05	0	0.000662162	0.000851573	0	0	0.00157958	0.0010897	0.00166156	1	1	0	0	0	0	1	1	0	0	1	1	2	1	1	0	0
317	Bacteria	Myxococcota	Polyangia	Polyangiales	NA	NA	ASV_ 288	1643	1113	0	0	0	0	47	22	0	0	551	357	0.00769818	0.00637005	0	0	0	0	0.000151076	6.00468e-05	0	0	0.00149802	0.000958189	0.00139463	1	1	0	0	0	0	1	0	0	0	1	1	2	1	1	0	0
318	Bacteria	Cyanobacteria	Cyanobacteria	Phormidesmiales	Nodosilineaceae	NA	ASV_ 29	9229	9261	0	0	0	0	0	0	0	0	317	637	0.043242	0.0530036	0	0	0	0	0	0	0	0	0.000861837	0.00170971	0.00823476	1	1	0	0	0	0	0	0	0	0	1	1	2	1	1	0	0
319	Bacteria	Thermotogota	Thermotogae	Thermotogales	Fervidobacteriaceae	Thermopallium	ASV_ 293	3	7	2451	2247	79	242	0	0	0	0	0	0	1.40563e-05	4.00632e-05	0.00782645	0.00872886	0.000309905	0.000945202	0	0	0	0	0	0	0.00148871	0	0	1	1	1	1	0	0	0	0	0	0	2	0	0	1	1
320	Bacteria	Calditrichota	Calditrichia	Calditrichales	Calditrichaceae	Calorithrix	ASV_ 304	10	15	1744	1317	74	321	0	0	34	34	32	22	4.68544e-05	8.58497e-05	0.00556888	0.00511611	0.000290291	0.00125376	0	0	0.000108087	0.000113712	8.69993e-05	5.9048e-05	0.0010608	0	0	1	1	1	1	0	0	1	1	0	0	2	0	0	1	1
321	Bacteria	Nitrospirota	Nitrospiria	Nitrospirales	Nitrospiraceae	Nitrospira	ASV_ 36	2203	1849	0	0	0	0	9314	5403	369	531	4318	4034	0.010322	0.0105824	0	0	0	0	0.0299387	0.0147469	0.00117306	0.00177592	0.0117395	0.0108273	0.00759215	1	1	0	0	0	0	1	1	1	1	1	1	2	1	1	0	0
322	Bacteria	Proteobacteria	Gammaproteobacteria	Xanthomonadales	Xanthomonadaceae	Rehaibacterium	ASV_ 389	2741	968	0	0	0	0	0	0	0	0	30	25	0.0128428	0.00554017	0	0	0	0	0	0	0	0	8.15619e-05	6.71e-05	0.0015443	1	1	0	0	0	0	0	0	0	0	0	0	2	1	1	0	0
323	Bacteria	Chloroflexi	Chloroflexia	Chloroflexales	Herpetosiphonaceae	Herpetosiphon	ASV_ 547	0	0	1630	1408	0	12	0	0	0	0	0	0	0	0	0.00520486	0.00546962	0	4.68695e-05	0	0	0	0	0	0	0.000893445	0	0	1	1	0	0	0	0	0	0	0	0	2	0	0	1	1
324	Bacteria	Cyanobacteria	Cyanobacteria	Cyanobacteriales	Cyanobacteriaceae	NA	ASV_ 61	7208	4293	0	0	27	0	0	0	0	0	160	248	0.0337727	0.0245702	0	0	0.000105917	0	0	0	0	0	0.000434997	0.000665632	0.00496245	1	1	0	0	1	0	0	0	0	0	1	1	2	1	1	0	0
325	Bacteria	Chloroflexi	Anaerolineae	Anaerolineales	Anaerolineaceae	NA	ASV_ 7	0	0	2365	2280	93	123	9585	10689	12932	8784	798	1334	0	0	0.00755183	0.00885705	0.000364825	0.000480412	0.0308098	0.0291745	0.0411111	0.0293779	0.00216955	0.00358046	0.0127898	0	0	1	1	1	1	1	1	1	1	1	1	2	0	0	1	1
326	Bacteria	Cyanobacteria	Cyanobacteria	Cyanobacteriales	Phormidiaceae	NA	ASV_ 9	10563	12603	0	0	5	6	0	0	0	0	656	1186	0.0494923	0.0721309	0	0	1.96142e-05	2.34348e-05	0	0	0	0	0.00178349	0.00318323	0.0105527	1	1	0	0	0	0	0	0	0	0	1	1	2	1	1	0	0
327	Bacteria	Cyanobacteria	Cyanobacteria	Cyanobacteriales	Oscillatoriaceae	Oxynema BDU 92071	ASV_ 97	6842	6915	0	0	220	238	0	0	0	0	11	17	0.0320578	0.0395767	0	0	0.000863026	0.000929579	0	0	0	0	2.9906e-05	4.5628e-05	0.00612522	1	1	0	0	1	1	0	0	0	0	0	0	2	1	1	0	0
328	Bacteria	Chloroflexi	Anaerolineae	Anaerolineales	Anaerolineaceae	NA	ASV_ 167	0	14	1245	1492	531	1444	0	0	588	553	0	62	0	8.01264e-05	0.00397549	0.00579593	0.00208303	0.00563996	0	0	0.00186927	0.0018495	0	0.000166408	0.00178831	0	0	1	1	1	1	0	0	1	1	0	1	2	0	0	0	1
329	Bacteria	Proteobacteria	Gammaproteobacteria	Burkholderiales	Rhodocyclaceae	Denitratisoma	ASV_ 254	1042	978	0	0	0	0	393	428	0	9	103	91	0.00488223	0.0055974	0	0	0	0	0.00126325	0.00116818	0	3.01003e-05	0.000280029	0.000244244	0.00112212	1	1	0	0	0	0	1	1	0	0	1	1	2	0	1	0	0
330	Archaea	Nanoarchaeota	Nanoarchaeia	Woesearchaeales	NA	NA	ASV_ 311	0	0	1352	1452	30	61	3	0	176	120	57	104	0	0	0.00431716	0.00564054	0.000117685	0.000238253	9.64314e-06	0	0.000559508	0.000401338	0.000154968	0.000279136	0.000976519	0	0	1	1	1	1	0	0	1	1	1	1	2	0	0	0	1
331	Bacteria	Planctomycetota	NA	NA	NA	NA	ASV_ 352	0	0	3780	959	140	26	0	0	0	0	0	0	0	0	0.0120702	0.0037254	0.000549198	0.000101551	0	0	0	0	0	0	0.00137053	0	0	1	1	1	1	0	0	0	0	0	0	2	0	0	1	0
332	Bacteria	Chloroflexi	Chloroflexia	Chloroflexales	Chloroflexaceae	Chloroflexus	ASV_ 41	7	0	1342	1457	493	358	265	229	337	311	0	48	3.27981e-05	0	0.00428523	0.00565997	0.00193396	0.00139827	0.000851811	0.000625032	0.00107133	0.00104013	0	0.000128832	0.00141895	0	0	1	1	1	1	1	1	1	1	0	1	2	0	0	0	1
333	Bacteria	Bdellovibrionota	Oligoflexia	Oligoflexales	Oligoflexaceae	Pseudobacteriovorax	ASV_ 498	0	0	611	2795	0	0	0	0	0	0	0	0	0	0	0.00195102	0.0108577	0	0	0	0	0	0	0	0	0.00106739	0	0	1	1	0	0	0	0	0	0	0	0	2	0	0	0	1
334	Archaea	Nanoarchaeota	Nanoarchaeia	Woesearchaeales	SCGC AAA011-D5	NA	ASV_ 511	0	0	1264	1648	0	0	0	0	205	178	0	0	0	0	0.00403616	0.00640194	0	0	0	0	0.0006517	0.000595318	0	0	0.00097376	0	0	1	1	0	0	0	0	1	1	0	0	2	0	0	0	1
335	Bacteria	Chloroflexi	Anaerolineae	SBR1031	NA	NA	ASV_ 52	1012	1186	0	0	11	4	835	1028	1033	1101	369	384	0.00474167	0.00678785	0	0	4.31513e-05	1.56232e-05	0.00268401	0.00280582	0.00328393	0.00368227	0.00100321	0.00103066	0.00217318	1	1	0	0	0	0	1	1	1	1	1	1	2	0	1	0	0
336	Bacteria	Cyanobacteria	Cyanobacteria	Cyanobacteriales	Microcystaceae	Synechocystis CCALA 700	ASV_ 568	1569	600	0	0	0	0	0	0	0	0	0	0	0.00735146	0.00343399	0	0	0	0	0	0	0	0	0	0	0.000898787	1	1	0	0	0	0	0	0	0	0	0	0	2	1	0	0	0
337	Bacteria	Firmicutes	NA	NA	NA	NA	ASV_ 612	1054	999	0	0	0	0	0	0	0	0	113	74	0.00493846	0.00571759	0	0	0	0	0	0	0	0	0.000307216	0.000198616	0.000930157	1	1	0	0	0	0	0	0	0	0	1	1	2	0	1	0	0
338	Bacteria	Firmicutes	Symbiobacteriia	Symbiobacteriales	Symbiobacteraceae	NA	ASV_ 732	947	998	0	0	44	54	0	0	0	0	0	0	0.00443711	0.00571187	0	0	0.000172605	0.000210913	0	0	0	0	0	0	0.000877708	1	1	0	0	1	1	0	0	0	0	0	0	2	0	1	0	0
339	Bacteria	Chloroflexi	Anaerolineae	Anaerolineales	Anaerolineaceae	NA	ASV_ 1003	0	0	96	86	0	0	21	0	11	0	58	50	0	0	0.000306544	0.000334082	0	0	6.7502e-05	0	3.49693e-05	0	0.000157686	0.0001342	8.62486e-05	0	0	1	1	0	0	0	0	0	0	1	1	2	0	0	0	0
340	Bacteria	Proteobacteria	Alphaproteobacteria	Thalassobaculales	Nisaeaceae	NA	ASV_ 1009	170	150	0	0	7	29	0	0	0	0	41	31	0.000796525	0.000858497	0	0	2.74599e-05	0.000113268	0	0	0	0	0.000111468	8.32041e-05	0.000165868	1	1	0	0	0	1	0	0	0	0	1	0	2	0	0	0	0
341	Bacteria	Planctomycetota	Planctomycetes	Planctomycetales	Rubinisphaeraceae	Planctomicrobium	ASV_ 1010	64	18	4	0	7	0	362	239	32	35	325	281	0.000299868	0.00010302	1.27727e-05	0	2.74599e-05	0	0.00116361	0.000652326	0.000101729	0.000117057	0.000883587	0.000754204	0.000342969	1	1	0	0	0	0	1	1	1	1	1	1	2	0	0	0	0
342	Bacteria	Hydrogenedentes	Hydrogenedentia	Hydrogenedentiales	Hydrogenedensaceae	NA	ASV_ 1014	0	0	99	104	27	80	0	0	69	84	0	0	0	0	0.000316123	0.000404006	0.000105917	0.000312463	0	0	0.000219353	0.000280936	0	0	0.000136567	0	0	1	1	1	1	0	0	1	1	0	0	2	0	0	0	0
343	Bacteria	Actinobacteriota	RBG-16-55-12	NA	NA	NA	ASV_ 1016	18	0	266	166	56	10	11	11	26	27	0	18	8.4338e-05	0	0.000849382	0.000644856	0.000219679	3.90579e-05	3.53582e-05	3.00234e-05	8.26546e-05	9.0301e-05	0	4.8312e-05	0.000176997	0	0	1	1	1	0	0	0	0	0	0	0	2	0	0	0	0
344	Bacteria	Proteobacteria	Alphaproteobacteria	NA	NA	NA	ASV_ 10164	22	18	0	0	0	0	0	0	0	0	0	0	0.00010308	0.00010302	0	0	0	0	0	0	0	0	0	0	1.71749e-05	1	1	0	0	0	0	0	0	0	0	0	0	2	0	0	0	0
345	Archaea	Crenarchaeota	Bathyarchaeia	NA	NA	NA	ASV_ 1017	86	63	0	0	0	0	0	0	78	57	35	76	0.000402948	0.000360569	0	0	0	0	0	0	0.000247964	0.000190635	9.51555e-05	0.000203984	0.000125105	1	1	0	0	0	0	0	0	1	1	0	1	2	0	0	0	0
346	Bacteria	Firmicutes	NA	NA	NA	NA	ASV_ 1021	0	0	818	715	0	0	0	0	0	0	0	0	0	0	0.00261201	0.00277754	0	0	0	0	0	0	0	0	0.000449129	0	0	1	1	0	0	0	0	0	0	0	0	2	0	0	0	0
347	Bacteria	Chloroflexi	Anaerolineae	SBR1031	NA	NA	ASV_ 1022	34	32	0	0	0	0	190	237	98	94	239	191	0.000159305	0.000183146	0	0	0	0	0.000610732	0.000646868	0.000311544	0.000314381	0.000649776	0.000512644	0.000282366	1	1	0	0	0	0	1	1	1	1	1	1	2	0	0	0	0
348	Bacteria	Verrucomicrobiota	Verrucomicrobiae	Pedosphaerales	Pedosphaeraceae	DEV114	ASV_ 10275	25	19	0	0	0	0	0	0	0	0	0	0	0.000117136	0.000108743	0	0	0	0	0	0	0	0	0	0	1.88233e-05	1	1	0	0	0	0	0	0	0	0	0	0	2	0	0	0	0
349	Bacteria	Desulfobacterota	Desulfobacteria	Desulfatiglandales	Desulfatiglandaceae	Desulfatiglans	ASV_ 1028	0	0	393	308	0	0	0	0	110	78	37	22	0	0	0.00125491	0.00119648	0	0	0	0	0.000349693	0.00026087	0.000100593	5.9048e-05	0.000268466	0	0	1	1	0	0	0	0	1	1	1	0	2	0	0	0	0
350	Bacteria	Bacteroidota	Kapabacteria	Kapabacteriales	NA	NA	ASV_ 103	126	96	0	0	0	0	0	0	0	0	38	28	0.000590366	0.000549438	0	0	0	0	0	0	0	0	0.000103312	7.5152e-05	0.000109856	1	1	0	0	0	0	0	0	0	0	1	0	2	0	0	0	0
351	Archaea	Crenarchaeota	Nitrososphaeria	SCGC AB-179-E04	NA	NA	ASV_ 1033	46	52	0	0	32	82	0	0	0	0	0	59	0.00021553	0.000297612	0	0	0.000125531	0.000320275	0	0	0	0	0	0.000158356	9.31087e-05	1	1	0	0	1	1	0	0	0	0	0	1	2	0	0	0	0
352	Bacteria	Proteobacteria	Gammaproteobacteria	Burkholderiales	Rhodocyclaceae	Denitratisoma	ASV_ 1036	7	0	76	53	0	0	183	148	402	337	0	0	3.27981e-05	0	0.00024268	0.000205888	0	0	0.000588232	0.000403951	0.00127797	0.00112709	0	0	0.000323217	0	0	1	1	0	0	1	1	1	1	0	0	2	0	0	0	0
353	Bacteria	Aquificota	Aquificae	Hydrogenothermales	Hydrogenothermaceae	Venenivibrio	ASV_ 1045	27	30	7	0	51	57	0	0	0	0	12	13	0.000126507	0.000171699	2.23521e-05	0	0.000200065	0.00022263	0	0	0	0	3.26247e-05	3.4892e-05	6.75642e-05	1	1	0	0	1	1	0	0	0	0	0	0	2	0	0	0	0
354	Archaea	Nanoarchaeota	Nanoarchaeia	Woesearchaeales	NA	NA	ASV_ 1046	0	15	356	428	137	212	0	0	0	0	0	0	0	8.58497e-05	0.00113677	0.00166264	0.00053743	0.000828028	0	0	0	0	0	0	0.000354226	0	0	1	1	1	1	0	0	0	0	0	0	2	0	0	0	0
355	Archaea	Nanoarchaeota	Nanoarchaeia	Woesearchaeales	GW2011	AR15	ASV_ 1050	0	0	538	587	0	0	0	0	55	51	0	0	0	0	0.00171792	0.0022803	0	0	0	0	0.000174846	0.000170569	0	0	0.00036197	0	0	1	1	0	0	0	0	1	1	0	0	2	0	0	0	0
356	Bacteria	Chloroflexi	Anaerolineae	SBR1031	NA	NA	ASV_ 1058	90	177	0	0	0	0	0	0	0	0	0	0	0.00042169	0.00101303	0	0	0	0	0	0	0	0	0	0	0.00011956	1	1	0	0	0	0	0	0	0	0	0	0	2	0	0	0	0
357	Bacteria	Patescibacteria	Parcubacteria	Candidatus Yanofskybacteria	NA	NA	ASV_ 1060	21	15	79	90	0	9	9	12	161	109	207	334	9.83943e-05	8.58497e-05	0.00025226	0.00034962	0	3.51521e-05	2.89294e-05	3.27528e-05	0.000511823	0.000364548	0.000562777	0.000896457	0.000268214	0	0	1	1	0	0	0	0	1	1	1	1	2	0	0	0	0
358	Bacteria	Proteobacteria	Gammaproteobacteria	Burkholderiales	TRA3-20	NA	ASV_ 1061	15	0	425	350	25	138	128	167	0	11	23	26	7.02816e-05	0	0.00135709	0.00135964	9.80711e-05	0.000538999	0.000411441	0.00045581	0	3.67893e-05	6.25308e-05	6.9784e-05	0.000371703	0	0	1	1	0	1	1	1	0	0	0	0	2	0	0	0	0
359	Bacteria	Chloroflexi	Dehalococcoidia	NA	NA	NA	ASV_ 1065	73	30	25	19	22	15	47	96	88	85	109	106	0.000342037	0.000171699	7.98291e-05	7.38088e-05	8.63026e-05	5.85869e-05	0.000151076	0.000262022	0.000279754	0.000284281	0.000296341	0.000284504	0.00019752	1	1	0	0	0	0	1	1	1	1	1	1	2	0	0	0	0
360	Bacteria	Bacteroidota	Bacteroidia	Chitinophagales	37-13	NA	ASV_ 1070	0	0	301	283	0	0	90	48	143	122	0	21	0	0	0.000961142	0.00109936	0	0	0.000289294	0.000131011	0.0004546	0.000408027	0	5.6364e-05	0.000283317	0	0	1	1	0	0	1	1	1	1	0	0	2	0	0	0	0
361	Bacteria	Chloroflexi	Dehalococcoidia	GIF9	NA	NA	ASV_ 1073	17	0	116	79	0	18	37	72	141	112	109	172	7.96525e-05	0	0.000370407	0.000306889	0	7.03043e-05	0.000118932	0.000196517	0.000448242	0.000374582	0.000296341	0.000461648	0.00022696	0	0	1	1	0	0	1	1	1	1	1	1	2	0	0	0	0
362	Archaea	Crenarchaeota	Bathyarchaeia	NA	NA	NA	ASV_ 1086	0	0	40	40	0	0	0	0	0	0	0	0	0	0	0.000127727	0.000155387	0	0	0	0	0	0	0	0	2.35928e-05	0	0	1	1	0	0	0	0	0	0	0	0	2	0	0	0	0
363	Bacteria	Chloroflexi	Anaerolineae	SBR1031	A4b	NA	ASV_ 1089	84	98	0	0	0	0	0	0	0	0	70	30	0.000393577	0.000560885	0	0	0	0	0	0	0	0	0.000190311	8.05201e-05	0.000102108	1	1	0	0	0	0	0	0	0	0	1	0	2	0	0	0	0
364	Archaea	Crenarchaeota	Bathyarchaeia	NA	NA	NA	ASV_ 1093	0	0	140	126	0	0	54	101	84	98	93	118	0	0	0.000447043	0.000489469	0	0	0.000173577	0.000275669	0.000267038	0.000327759	0.000252842	0.000316712	0.000212509	0	0	1	1	0	0	1	1	1	1	1	1	2	0	0	0	0
365	Bacteria	Chloroflexi	Anaerolineae	Ardenticatenales	NA	NA	ASV_ 110	70	79	0	0	0	0	2555	2198	859	441	1034	1527	0.000327981	0.000452142	0	0	0	0	0.00821274	0.00599922	0.00273078	0.00147492	0.00281117	0.00409847	0.00217562	1	1	0	0	0	0	1	1	1	1	1	1	2	0	0	0	0
366	Bacteria	Chloroflexi	Anaerolineae	Anaerolineales	Anaerolineaceae	Anaerolinea	ASV_ 1101	0	0	588	543	8	60	0	0	0	0	0	0	0	0	0.00187758	0.00210938	3.13828e-05	0.000234348	0	0	0	0	0	0	0.000354391	0	0	1	1	0	1	0	0	0	0	0	0	2	0	0	0	0
367	Bacteria	Gemmatimonadota	BD2-11 terrestrial group	NA	NA	NA	ASV_ 1107	333	127	0	0	30	11	15	33	94	87	262	204	0.00156025	0.000726861	0	0	0.000117685	4.29637e-05	4.82157e-05	9.00702e-05	0.000298828	0.00029097	0.000712307	0.000547536	0.000369641	1	1	0	0	1	0	0	0	1	1	1	1	2	0	0	0	0
368	Bacteria	Myxococcota	Polyangia	Blfdi19	NA	NA	ASV_ 1127	208	64	0	0	481	136	18	10	0	0	27	17	0.000974572	0.000366292	0	0	0.00188689	0.000531188	5.78588e-05	2.7294e-05	0	0	7.34057e-05	4.5628e-05	0.000330261	1	1	0	0	1	1	0	0	0	0	0	0	2	0	0	0	0
369	Archaea	Crenarchaeota	Bathyarchaeia	NA	NA	NA	ASV_ 1128	0	0	268	200	0	0	0	0	0	0	0	0	0	0	0.000855768	0.000776934	0	0	0	0	0	0	0	0	0.000136059	0	0	1	1	0	0	0	0	0	0	0	0	2	0	0	0	0
370	Bacteria	Latescibacterota	NA	NA	NA	NA	ASV_ 1129	396	251	0	0	18	7	0	0	0	0	154	116	0.00185544	0.00143655	0	0	7.06112e-05	2.73405e-05	0	0	0	0	0.000418684	0.000311344	0.000343331	1	1	0	0	0	0	0	0	0	0	1	1	2	0	0	0	0
371	Bacteria	Proteobacteria	Gammaproteobacteria	Xanthomonadales	NA	NA	ASV_ 1132	0	0	296	209	45	25	20	37	67	21	11	0	0	0	0.000945177	0.000811896	0.000176528	9.76448e-05	6.42876e-05	0.000100988	0.000212995	7.02341e-05	2.9906e-05	0	0.000209138	0	0	1	1	1	0	0	1	1	0	0	0	2	0	0	0	0
372	Archaea	Crenarchaeota	Methanomethylicia	Methanomethyliales	Methanomethyliaceae	Candidatus Methanomethylicus	ASV_ 1133	0	0	376	372	76	134	0	23	0	0	0	0	0	0	0.00120063	0.0014451	0.000298136	0.000523376	0	6.27762e-05	0	0	0	0	0.000294168	0	0	1	1	1	1	0	0	0	0	0	0	2	0	0	0	0
373	Bacteria	Sumerlaeota	Sumerlaeia	NA	NA	NA	ASV_ 1137	224	213	9	0	0	0	52	77	27	33	147	116	0.00104954	0.00121907	2.87385e-05	0	0	0	0.000167148	0.000210164	8.58336e-05	0.000110368	0.000399653	0.000311344	0.000298488	1	1	0	0	0	0	1	1	0	1	1	1	2	0	0	0	0
374	Archaea	Crenarchaeota	Bathyarchaeia	NA	NA	NA	ASV_ 1138	0	0	634	655	0	0	0	0	0	0	0	0	0	0	0.00202447	0.00254446	0	0	0	0	0	0	0	0	0.000380744	0	0	1	1	0	0	0	0	0	0	0	0	2	0	0	0	0
375	Bacteria	Planctomycetota	Phycisphaerae	CCM11a	NA	NA	ASV_ 114	44	51	0	0	0	0	4205	5378	130	126	2096	2136	0.000206159	0.000291889	0	0	0	0	0.0135165	0.0146787	0.000413273	0.000421405	0.00569845	0.00573303	0.00341328	1	1	0	0	0	0	1	1	1	1	1	1	2	0	0	0	0
376	Archaea	Nanoarchaeota	Nanoarchaeia	Woesearchaeales	NA	NA	ASV_ 1153	78	41	0	0	0	0	9	18	4	0	284	167	0.000365465	0.000234656	0	0	0	0	2.89294e-05	4.91292e-05	1.27161e-05	0	0.000772119	0.000448228	0.00015927	1	1	0	0	0	0	0	0	0	0	1	1	2	0	0	0	0
377	Bacteria	Firmicutes	Bacilli	Bacillales	Bacillaceae	Anoxybacillus	ASV_ 1158	13	0	627	360	51	0	0	24	30	32	39	34	6.09108e-05	0	0.00200211	0.00139848	0.000200065	0	0	6.55056e-05	9.53707e-05	0.000107023	0.00010603	9.12561e-05	0.000343896	0	0	1	1	1	0	0	0	0	1	1	0	2	0	0	0	0
378	Bacteria	Chloroflexi	Anaerolineae	Caldilineales	Caldilineaceae	Caldilinea	ASV_ 1162	0	0	63	37	36	17	0	0	0	0	0	0	0	0	0.000201169	0.000143733	0.000141222	6.63985e-05	0	0	0	0	0	0	4.60436e-05	0	0	1	1	1	0	0	0	0	0	0	0	2	0	0	0	0
379	Archaea	Nanoarchaeota	Nanoarchaeia	Woesearchaeales	SCGC AAA011-D5	NA	ASV_ 1164	4	0	380	535	6	28	0	0	0	0	0	0	1.87418e-05	0	0.0012134	0.0020783	2.35371e-05	0.000109362	0	0	0	0	0	0	0.000286945	0	0	1	1	0	1	0	0	0	0	0	0	2	0	0	0	0
380	Bacteria	Proteobacteria	Gammaproteobacteria	Burkholderiales	Methylophilaceae	MM2	ASV_ 1165	158	196	0	0	0	0	0	0	0	0	18	19	0.0007403	0.00112177	0	0	0	0	0	0	0	0	4.89371e-05	5.0996e-05	0.0001635	1	1	0	0	0	0	0	0	0	0	0	0	2	0	0	0	0
381	Bacteria	Chloroflexi	Anaerolineae	Anaerolineales	Anaerolineaceae	NA	ASV_ 1166	0	0	171	175	0	0	0	0	9	0	0	17	0	0	0.000546031	0.000679818	0	0	0	0	2.86112e-05	0	0	4.5628e-05	0.000108341	0	0	1	1	0	0	0	0	0	0	0	0	2	0	0	0	0
382	Bacteria	Verrucomicrobiota	Verrucomicrobiae	Pedosphaerales	Pedosphaeraceae	NA	ASV_ 1173	13	0	61	77	0	0	0	22	28	14	46	48	6.09108e-05	0	0.000194783	0.00029912	0	0	0	6.00468e-05	8.90127e-05	4.68227e-05	0.000125062	0.000128832	8.37158e-05	0	0	1	1	0	0	0	0	0	0	1	1	2	0	0	0	0
383	Archaea	Crenarchaeota	Bathyarchaeia	NA	NA	NA	ASV_ 1176	0	0	43	28	0	0	0	0	0	0	0	0	0	0	0.000137306	0.000108771	0	0	0	0	0	0	0	0	2.05064e-05	0	0	1	1	0	0	0	0	0	0	0	0	2	0	0	0	0
384	Bacteria	Proteobacteria	Gammaproteobacteria	Burkholderiales	Comamonadaceae	Hydrogenophaga	ASV_ 1178	27	24	4	4	195	459	0	0	0	0	21	11	0.000126507	0.000137359	1.27727e-05	1.55387e-05	0.000764955	0.00179276	0	0	0	0	5.70933e-05	2.9524e-05	0.000244709	1	1	0	0	1	1	0	0	0	0	0	0	2	0	0	0	0
385	Bacteria	Planctomycetota	OM190	NA	NA	NA	ASV_ 1189	112	98	0	0	0	0	7	0	0	0	619	385	0.00052477	0.000560885	0	0	0	0	2.25007e-05	0	0	0	0.00168289	0.00103334	0.000318699	1	1	0	0	0	0	0	0	0	0	1	1	2	0	0	0	0
386	Bacteria	Spirochaetota	Brachyspirae	Brachyspirales	Brachyspirales Incertae Sedis	Exilispira	ASV_ 119	12	8	429	413	20	67	0	0	117	93	88	258	5.62253e-05	4.57865e-05	0.00136987	0.00160437	7.84569e-05	0.000261688	0	0	0.000371946	0.000311037	0.000239248	0.000692472	0.000419258	0	0	1	1	0	1	0	0	1	1	1	1	2	0	0	0	0
387	Bacteria	Bacteroidota	Kryptonia	Kryptoniales	BSV26	NA	ASV_ 1193	35	37	0	0	0	0	168	274	6	0	84	80	0.00016399	0.000211763	0	0	0	0	0.000540016	0.000747855	1.90741e-05	0	0.000228373	0.00021472	0.000177149	1	1	0	0	0	0	1	1	0	0	1	1	2	0	0	0	0
388	Bacteria	DTB120	NA	NA	NA	NA	ASV_ 1195	86	81	0	0	0	0	52	59	0	0	85	75	0.000402948	0.000463588	0	0	0	0	0.000167148	0.000161035	0	0	0.000231092	0.0002013	0.000135593	1	1	0	0	0	0	1	1	0	0	1	1	2	0	0	0	0
389	Bacteria	Bacteroidota	Bacteroidia	Flavobacteriales	Flavobacteriaceae	NA	ASV_ 120	193	73	24	18	15	13	46	74	0	0	253	271	0.00090429	0.000417802	7.66359e-05	6.99241e-05	5.88427e-05	5.07753e-05	0.000147861	0.000201976	0	0	0.000687838	0.000727364	0.000278609	1	1	0	0	0	0	1	1	0	0	1	1	2	0	0	0	0
390	Bacteria	Proteobacteria	Gammaproteobacteria	Burkholderiales	Comamonadaceae	Tepidimonas	ASV_ 121	0	0	235	251	359	407	441	576	1026	1197	76	66	0	0	0.000750394	0.000975053	0.0014083	0.00158966	0.00141754	0.00157213	0.00326168	0.00400334	0.000206623	0.000177144	0.00128016	0	0	1	1	1	1	1	1	1	1	1	1	2	0	0	0	0
391	Bacteria	Proteobacteria	Gammaproteobacteria	Legionellales	Legionellaceae	Legionella	ASV_ 1213	74	34	0	0	95	21	0	0	0	0	60	40	0.000346723	0.000194593	0	0	0.00037267	8.20216e-05	0	0	0	0	0.000163124	0.00010736	0.000105541	1	1	0	0	1	0	0	0	0	0	1	1	2	0	0	0	0
392	Archaea	Nanoarchaeota	Nanoarchaeia	Woesearchaeales	NA	NA	ASV_ 1214	65	75	0	0	0	0	0	0	0	0	23	20	0.000304554	0.000429248	0	0	0	0	0	0	0	0	6.25308e-05	5.368e-05	7.08344e-05	1	1	0	0	0	0	0	0	0	0	0	0	2	0	0	0	0
393	Bacteria	Chloroflexi	Anaerolineae	NA	NA	NA	ASV_ 1215	0	0	70	47	0	0	0	0	0	0	0	0	0	0	0.000223521	0.00018258	0	0	0	0	0	0	0	0	3.38418e-05	0	0	1	1	0	0	0	0	0	0	0	0	2	0	0	0	0
394	Bacteria	Planctomycetota	Planctomycetes	Pirellulales	Pirellulaceae	NA	ASV_ 1230	0	0	93	57	0	0	44	28	0	5	0	5	0	0	0.000296964	0.000221426	0	0	0.000141433	7.64232e-05	0	1.67224e-05	0	1.342e-05	6.38657e-05	0	0	1	1	0	0	1	0	0	0	0	0	2	0	0	0	0
395	Bacteria	NA	NA	NA	NA	NA	ASV_ 1232	12	0	127	182	0	0	56	69	34	25	83	124	5.62253e-05	0	0.000405532	0.00070701	0	0	0.000180005	0.000188329	0.000108087	8.3612e-05	0.000225654	0.000332816	0.000190606	0	0	1	1	0	0	1	1	1	0	1	1	2	0	0	0	0
396	Bacteria	Cyanobacteria	Cyanobacteria	NA	NA	NA	ASV_ 1234	42	806	0	0	0	0	0	0	0	0	0	0	0.000196789	0.00461299	0	0	0	0	0	0	0	0	0	0	0.000400815	1	1	0	0	0	0	0	0	0	0	0	0	2	0	0	0	0
397	Archaea	Crenarchaeota	Bathyarchaeia	NA	NA	NA	ASV_ 1235	206	184	0	0	0	0	0	0	258	165	125	196	0.000965201	0.00105309	0	0	0	0	0	0	0.000820188	0.000551839	0.000339841	0.000526064	0.000354685	1	1	0	0	0	0	0	0	1	1	1	1	2	0	0	0	0
398	Bacteria	Verrucomicrobiota	Kiritimatiellae	WCHB1-41	NA	NA	ASV_ 1241	7	8	133	93	32	48	21	19	198	215	80	65	3.27981e-05	4.57865e-05	0.000424691	0.000361274	0.000125531	0.000187478	6.7502e-05	5.18586e-05	0.000629447	0.000719064	0.000217498	0.00017446	0.000253116	0	0	1	1	1	1	0	0	1	1	1	1	2	0	0	0	0
399	Bacteria	Chloroflexi	Anaerolineae	Anaerolineales	Anaerolineaceae	NA	ASV_ 1247	0	0	78	75	0	0	0	0	162	125	198	194	0	0	0.000249067	0.00029135	0	0	0	0	0.000515002	0.00041806	0.000538308	0.000520696	0.00021104	0	0	1	1	0	0	0	0	1	1	1	1	2	0	0	0	0
400	Bacteria	Chloroflexi	Anaerolineae	Anaerolineales	Anaerolineaceae	Anaerolinea	ASV_ 1249	0	0	154	136	0	0	0	10	0	6	0	0	0	0	0.000491747	0.000528315	0	0	0	2.7294e-05	0	2.00669e-05	0	0	8.8952e-05	0	0	1	1	0	0	0	0	0	0	0	0	2	0	0	0	0
401	Archaea	Micrarchaeota	Micrarchaeia	Micrarchaeales	NA	NA	ASV_ 1252	7	7	219	227	207	256	0	0	119	66	22	23	3.27981e-05	4.00632e-05	0.000699303	0.000881821	0.000812029	0.000999883	0	0	0.000378304	0.000220736	5.9812e-05	6.1732e-05	0.000348873	0	0	1	1	1	1	0	0	1	1	0	0	2	0	0	0	0
402	Bacteria	Desulfobacterota	NA	NA	NA	NA	ASV_ 1253	0	0	125	88	0	0	0	0	165	172	314	293	0	0	0.000399146	0.000341851	0	0	0	0	0.000524539	0.000575251	0.000853681	0.000786413	0.000290073	0	0	1	1	0	0	0	0	1	1	1	1	2	0	0	0	0
403	Bacteria	Calditrichota	Calditrichia	Calditrichales	Calditrichaceae	NA	ASV_ 1254	0	0	65	58	0	9	0	0	78	87	29	29	0	0	0.000207556	0.000225311	0	3.51521e-05	0	0	0.000247964	0.00029097	7.88431e-05	7.78361e-05	9.69693e-05	0	0	1	1	0	0	0	0	1	1	0	0	2	0	0	0	0
404	Bacteria	Nitrospirota	Thermodesulfovibrionia	NA	NA	NA	ASV_ 1265	0	0	32	33	0	0	0	0	0	0	0	0	0	0	0.000102181	0.000128194	0	0	0	0	0	0	0	0	1.9198e-05	0	0	1	1	0	0	0	0	0	0	0	0	2	0	0	0	0
405	Bacteria	Sva0485	NA	NA	NA	NA	ASV_ 1276	6	0	183	162	12	52	0	0	82	55	0	28	2.81127e-05	0	0.000584349	0.000629317	4.70741e-05	0.000203101	0	0	0.00026068	0.000183946	0	7.5152e-05	0.000167644	0	0	1	1	0	1	0	0	1	1	0	0	2	0	0	0	0
406	Bacteria	Chloroflexi	Anaerolineae	Thermoflexales	Thermoflexaceae	Thermoflexus	ASV_ 1280	132	84	0	0	0	0	0	0	217	183	147	133	0.000618478	0.000480758	0	0	0	0	0	0	0.000689848	0.00061204	0.000399653	0.000356972	0.000263146	1	1	0	0	0	0	0	0	1	1	1	1	2	0	0	0	0
407	Bacteria	Planctomycetota	Planctomycetes	Pirellulales	Pirellulaceae	Thermogutta	ASV_ 1287	0	0	137	114	33	0	37	0	147	166	66	31	0	0	0.000437463	0.000442853	0.000129454	0	0.000118932	0	0.000467316	0.000555184	0.000179436	8.32041e-05	0.000201154	0	0	1	1	1	0	1	0	1	1	1	0	2	0	0	0	0
408	Archaea	Crenarchaeota	Bathyarchaeia	NA	NA	NA	ASV_ 129	0	0	232	148	962	1164	0	0	202	203	158	151	0	0	0.000740814	0.000574931	0.00377378	0.00454634	0	0	0.000642163	0.00067893	0.000429559	0.000405284	0.00098265	0	0	1	1	1	1	0	0	1	1	1	1	2	0	0	0	0
409	Archaea	Crenarchaeota	Bathyarchaeia	NA	NA	NA	ASV_ 1292	0	0	118	92	0	0	0	0	0	0	0	0	0	0	0.000376793	0.00035739	0	0	0	0	0	0	0	0	6.11819e-05	0	0	1	1	0	0	0	0	0	0	0	0	2	0	0	0	0
410	Bacteria	Verrucomicrobiota	Kiritimatiellae	WCHB1-41	NA	NA	ASV_ 1297	69	44	0	0	14	16	0	0	0	0	108	110	0.000323296	0.000251826	0	0	5.49198e-05	6.24927e-05	0	0	0	0	0.000293623	0.00029524	0.000106783	1	1	0	0	0	0	0	0	0	0	1	1	2	0	0	0	0
411	Bacteria	Chloroflexi	Anaerolineae	Anaerolineales	Anaerolineaceae	NA	ASV_ 1301	0	0	171	127	0	30	0	0	0	29	0	0	0	0	0.000546031	0.000493353	0	0.000117174	0	0	0	9.699e-05	0	0	0.000104462	0	0	1	1	0	1	0	0	0	0	0	0	2	0	0	0	0
412	Bacteria	Armatimonadota	Chthonomonadetes	Chthonomonadales	NA	NA	ASV_ 1308	0	0	73	74	11	17	0	0	0	0	0	0	0	0	0.000233101	0.000287466	4.31513e-05	6.63985e-05	0	0	0	0	0	0	5.25097e-05	0	0	1	1	0	0	0	0	0	0	0	0	2	0	0	0	0
413	Bacteria	Chloroflexi	Dehalococcoidia	GIF9	AB-539-J10	SCGC-AB-539-J10	ASV_ 131	230	177	0	0	32	43	1388	2129	2478	2785	1402	1421	0.00107765	0.00101303	0	0	0.000125531	0.000167949	0.00446156	0.00581089	0.00787762	0.00931438	0.00381166	0.00381397	0.00312285	1	1	0	0	1	1	1	1	1	1	1	1	2	0	0	0	0
414	Archaea	Crenarchaeota	Bathyarchaeia	NA	NA	NA	ASV_ 1310	41	49	0	0	0	0	0	0	196	154	95	131	0.000192103	0.000280442	0	0	0	0	0	0	0.000623089	0.00051505	0.000258279	0.000351604	0.000185047	1	1	0	0	0	0	0	0	1	1	1	1	2	0	0	0	0
415	Bacteria	Proteobacteria	Gammaproteobacteria	Immundisolibacterales	Immundisolibacteraceae	Immundisolibacter	ASV_ 1311	155	155	10	17	15	33	0	0	0	14	36	33	0.000726244	0.000887113	3.19316e-05	6.60394e-05	5.88427e-05	0.000128891	0	0	0	4.68227e-05	9.78742e-05	8.85721e-05	0.000177694	1	1	0	0	0	1	0	0	0	0	0	0	2	0	0	0	0
416	Bacteria	Desulfobacterota	Syntrophobacteria	Syntrophobacterales	Syntrophobacteraceae	Desulfoglaeba	ASV_ 1312	0	0	238	192	0	0	0	0	152	139	184	220	0	0	0.000759973	0.000745857	0	0	0	0	0.000483212	0.000464883	0.000500246	0.00059048	0.000295388	0	0	1	1	0	0	0	0	1	1	1	1	2	0	0	0	0
417	Bacteria	Spirochaetota	Leptospirae	Leptospirales	Leptospiraceae	Turneriella	ASV_ 1315	0	0	60	54	0	0	18	10	50	52	0	0	0	0	0.00019159	0.000209772	0	0	5.78588e-05	2.7294e-05	0.000158951	0.000173913	0	0	6.82816e-05	0	0	1	1	0	0	0	0	1	1	0	0	2	0	0	0	0
418	Bacteria	Planctomycetota	Phycisphaerae	MSBL9	KCLunmb-38-53	NA	ASV_ 1318	5	0	58	89	9	0	0	0	313	407	0	42	2.34272e-05	0	0.000185204	0.000345736	3.53056e-05	0	0	0	0.000995034	0.0013612	0	0.000112728	0.000254887	0	0	1	1	0	0	0	0	1	1	0	1	2	0	0	0	0
419	Bacteria	Bdellovibrionota	Bdellovibrionia	Bdellovibrionales	Bdellovibrionaceae	OM27 clade	ASV_ 1319	115	103	0	0	0	0	0	0	0	0	156	142	0.000538826	0.000589501	0	0	0	0	0	0	0	0	0.000424122	0.000381128	0.000161131	1	1	0	0	0	0	0	0	0	0	1	1	2	0	0	0	0
420	Bacteria	Proteobacteria	Gammaproteobacteria	Burkholderiales	Nitrosomonadaceae	NA	ASV_ 132	123	167	0	0	802	750	259	273	606	707	949	781	0.000576309	0.000955793	0	0	0.00314612	0.00292934	0.000832524	0.000745126	0.00192649	0.00236455	0.00258007	0.00209621	0.00151271	1	1	0	0	1	1	1	1	1	1	1	1	2	0	0	0	0
421	Bacteria	Proteobacteria	Gammaproteobacteria	Acidiferrobacterales	Acidiferrobacteraceae	Sulfurifustis	ASV_ 1329	337	304	0	0	0	0	16	38	24	38	238	114	0.00157899	0.00173989	0	0	0	0	5.14301e-05	0.000103717	7.62966e-05	0.00012709	0.000647057	0.000305976	0.000385871	1	1	0	0	0	0	0	1	0	1	1	1	2	0	0	0	0
422	Bacteria	Bacteroidota	Bacteroidia	Flavobacteriales	Cryomorphaceae	NA	ASV_ 1334	193	256	0	0	0	0	0	0	0	0	0	0	0.00090429	0.00146517	0	0	0	0	0	0	0	0	0	0	0.000197455	1	1	0	0	0	0	0	0	0	0	0	0	2	0	0	0	0
423	Bacteria	Chloroflexi	Anaerolineae	Anaerolineales	Anaerolineaceae	NA	ASV_ 1335	173	221	0	0	0	0	0	0	0	0	25	35	0.000810582	0.00126485	0	0	0	0	0	0	0	0	6.79682e-05	9.39401e-05	0.000186445	1	1	0	0	0	0	0	0	0	0	0	0	2	0	0	0	0
424	Bacteria	Elusimicrobiota	Elusimicrobia	Lineage IV	NA	NA	ASV_ 1337	0	0	178	222	153	114	0	0	76	87	27	26	0	0	0.000568383	0.000862397	0.000600195	0.00044526	0	0	0.000241606	0.00029097	7.34057e-05	6.9784e-05	0.000262667	0	0	1	1	1	1	0	0	1	1	0	0	2	0	0	0	0
425	Bacteria	Acidobacteriota	Subgroup 18	NA	NA	NA	ASV_ 1342	18	15	49	27	14	10	45	37	57	54	18	29	8.4338e-05	8.58497e-05	0.000156465	0.000104886	5.49198e-05	3.90579e-05	0.000144647	0.000100988	0.000181204	0.000180602	4.89371e-05	7.78361e-05	0.000104978	0	0	1	1	0	0	1	1	1	1	0	0	2	0	0	0	0
426	Bacteria	Chloroflexi	Anaerolineae	SBR1031	A4b	OLB13	ASV_ 135	73	145	0	0	83	90	0	0	83	70	0	0	0.000342037	0.00082988	0	0	0.000325596	0.000351521	0	0	0.000263859	0.000234114	0	0	0.000195584	1	1	0	0	1	1	0	0	1	1	0	0	2	0	0	0	0
427	Archaea	Crenarchaeota	Bathyarchaeia	NA	NA	NA	ASV_ 1361	0	0	41	57	0	0	9	14	0	7	0	0	0	0	0.00013092	0.000221426	0	0	2.89294e-05	3.82116e-05	0	2.34114e-05	0	0	3.69082e-05	0	0	1	1	0	0	0	0	0	0	0	0	2	0	0	0	0
428	Bacteria	Chloroflexi	Anaerolineae	NA	NA	NA	ASV_ 1364	112	59	0	0	24	0	52	40	122	141	202	99	0.00052477	0.000337675	0	0	9.41483e-05	0	0.000167148	0.000109176	0.000387841	0.000471572	0.000549183	0.000265716	0.000242269	1	1	0	0	0	0	1	1	1	1	1	1	2	0	0	0	0
429	Archaea	Crenarchaeota	Bathyarchaeia	NA	NA	NA	ASV_ 1368	0	0	80	59	0	0	0	0	0	0	0	0	0	0	0.000255453	0.000229196	0	0	0	0	0	0	0	0	4.03874e-05	0	0	1	1	0	0	0	0	0	0	0	0	2	0	0	0	0
430	Bacteria	Proteobacteria	Gammaproteobacteria	Acidiferrobacterales	Acidiferrobacteraceae	Sulfurifustis	ASV_ 137	727	511	0	0	0	0	1891	3096	219	310	2374	1664	0.00340632	0.00292461	0	0	0	0	0.00607839	0.00845022	0.000696206	0.00103679	0.00645426	0.00446618	0.00279275	1	1	0	0	0	0	1	1	1	1	1	1	2	0	0	0	0
431	Archaea	Crenarchaeota	Bathyarchaeia	NA	NA	NA	ASV_ 1371	62	37	24	12	27	0	0	0	0	0	35	0	0.000290497	0.000211763	7.66359e-05	4.66161e-05	0.000105917	0	0	0	0	0	9.51555e-05	0	6.8882e-05	1	1	0	0	1	0	0	0	0	0	0	0	2	0	0	0	0
432	Bacteria	Acidobacteriota	Acidobacteriae	Bryobacterales	Bryobacteraceae	Bryobacter	ASV_ 1377	76	27	0	0	14	19	0	0	0	0	26	14	0.000356094	0.000154529	0	0	5.49198e-05	7.42101e-05	0	0	0	0	7.06869e-05	3.7576e-05	6.23347e-05	1	1	0	0	0	0	0	0	0	0	0	0	2	0	0	0	0
433	Bacteria	Firmicutes	NA	NA	NA	NA	ASV_ 1378	526	529	0	0	0	0	0	0	0	0	0	0	0.00246454	0.00302763	0	0	0	0	0	0	0	0	0	0	0.000457681	1	1	0	0	0	0	0	0	0	0	0	0	2	0	0	0	0
434	Bacteria	Proteobacteria	Gammaproteobacteria	Burkholderiales	Comamonadaceae	Ramlibacter	ASV_ 1385	13	0	42	31	10	18	0	0	0	0	43	24	6.09108e-05	0	0.000134113	0.000120425	3.92285e-05	7.03043e-05	0	0	0	0	0.000116905	6.4416e-05	5.05252e-05	0	0	1	1	0	0	0	0	0	0	1	0	2	0	0	0	0
435	Bacteria	Chloroflexi	NA	NA	NA	NA	ASV_ 1396	36	19	16	0	28	8	41	48	92	82	92	55	0.000168676	0.000108743	5.10906e-05	0	0.00010984	3.12463e-05	0.00013179	0.000131011	0.00029247	0.000274247	0.000250123	0.00014762	0.000141405	1	1	0	0	1	0	1	1	1	1	1	1	2	0	0	0	0
436	Bacteria	Actinobacteriota	WCHB1-81	NA	NA	NA	ASV_ 1398	0	0	143	117	14	10	0	0	0	0	0	11	0	0	0.000456622	0.000454507	5.49198e-05	3.90579e-05	0	0	0	0	0	2.9524e-05	8.62192e-05	0	0	1	1	0	0	0	0	0	0	0	0	2	0	0	0	0
437	Bacteria	NA	NA	NA	NA	NA	ASV_ 1405	23	23	0	0	114	139	0	0	0	0	44	40	0.000107765	0.000131636	0	0	0.000447204	0.000542905	0	0	0	0	0.000119624	0.00010736	0.000121375	1	1	0	0	1	1	0	0	0	0	1	1	2	0	0	0	0
438	Bacteria	Desulfobacterota	NA	NA	NA	NA	ASV_ 1414	0	0	111	64	0	0	0	66	83	85	0	0	0	0	0.000354441	0.000248619	0	0	0	0.00018014	0.000263859	0.000284281	0	0	0.000110945	0	0	1	1	0	0	0	1	1	1	0	0	2	0	0	0	0
439	Archaea	Nanoarchaeota	Nanoarchaeia	Woesearchaeales	GW2011_GWC1_47_15	NA	ASV_ 1415	6	0	119	160	28	29	0	0	0	0	0	0	2.81127e-05	0	0.000379987	0.000621547	0.00010984	0.000113268	0	0	0	0	0	0	0.000104396	0	0	1	1	1	1	0	0	0	0	0	0	2	0	0	0	0
440	Archaea	Crenarchaeota	Bathyarchaeia	NA	NA	NA	ASV_ 1416	64	0	110	25	114	33	0	0	0	0	0	0	0.000299868	0	0.000351248	9.71168e-05	0.000447204	0.000128891	0	0	0	0	0	0	0.000110361	1	0	1	0	1	1	0	0	0	0	0	0	2	0	0	0	0
441	Bacteria	Chloroflexi	Anaerolineae	Anaerolineales	Anaerolineaceae	NA	ASV_ 1418	0	0	190	155	0	0	0	0	53	32	44	46	0	0	0.000606701	0.000602124	0	0	0	0	0.000168488	0.000107023	0.000119624	0.000123464	0.000143952	0	0	1	1	0	0	0	0	1	1	1	1	2	0	0	0	0
442	Bacteria	Nitrospirota	Nitrospiria	Nitrospirales	Nitrospiraceae	Nitrospira	ASV_ 1421	77	110	0	0	0	0	342	443	0	5	19	18	0.000360779	0.000629564	0	0	0	0	0.00109932	0.00120912	0	1.67224e-05	5.16558e-05	4.8312e-05	0.000284623	1	1	0	0	0	0	1	1	0	0	0	0	2	0	0	0	0
443	Bacteria	WS1	NA	NA	NA	NA	ASV_ 1427	16	10	57	68	14	0	0	0	12	12	55	38	7.49671e-05	5.72331e-05	0.00018201	0.000264158	5.49198e-05	0	0	0	3.81483e-05	4.01338e-05	0.00014953	0.000101992	8.02577e-05	0	0	1	1	0	0	0	0	0	0	1	1	2	0	0	0	0
444	Bacteria	Nitrospirota	Thermodesulfovibrionia	NA	NA	NA	ASV_ 143	582	364	25	19	0	0	642	892	390	323	3343	3270	0.00272693	0.00208329	7.98291e-05	7.38088e-05	0	0	0.00206363	0.00243462	0.00123982	0.00108027	0.00908871	0.00877669	0.00247063	1	1	0	0	0	0	1	1	1	1	1	1	2	0	0	0	0
445	Bacteria	NA	NA	NA	NA	NA	ASV_ 1450	15	10	307	399	35	69	0	0	21	8	0	10	7.02816e-05	5.72331e-05	0.000980301	0.00154998	0.0001373	0.0002695	0	0	6.67595e-05	2.67559e-05	0	2.684e-05	0.000265413	0	0	1	1	1	1	0	0	0	0	0	0	2	0	0	0	0
446	Bacteria	NA	NA	NA	NA	NA	ASV_ 1455	52	64	0	0	0	0	0	0	0	0	272	204	0.000243643	0.000366292	0	0	0	0	0	0	0	0	0.000739494	0.000547536	0.00015808	1	1	0	0	0	0	0	0	0	0	1	1	2	0	0	0	0
447	Archaea	Crenarchaeota	Bathyarchaeia	NA	NA	NA	ASV_ 1457	41	53	0	14	49	36	0	0	24	16	7	22	0.000192103	0.000303336	0	5.43854e-05	0.000192219	0.000140609	0	0	7.62966e-05	5.35117e-05	1.90311e-05	5.9048e-05	9.08783e-05	1	1	0	0	1	1	0	0	0	0	0	0	2	0	0	0	0
448	Archaea	Crenarchaeota	Bathyarchaeia	NA	NA	NA	ASV_ 1463	0	0	67	65	0	0	0	0	0	0	0	0	0	0	0.000213942	0.000252504	0	0	0	0	0	0	0	0	3.88705e-05	0	0	1	1	0	0	0	0	0	0	0	0	2	0	0	0	0
449	Archaea	Crenarchaeota	Bathyarchaeia	NA	NA	NA	ASV_ 147	10	0	161	174	0	0	13	13	0	0	0	0	4.68544e-05	0	0.000514099	0.000675933	0	0	4.17869e-05	3.54822e-05	0	0	0	0	0.000109513	0	0	1	1	0	0	0	0	0	0	0	0	2	0	0	0	0
450	Bacteria	Proteobacteria	Alphaproteobacteria	NA	NA	NA	ASV_ 1474	94	124	12	7	7	0	30	43	42	31	70	96	0.000440432	0.000709691	3.8318e-05	2.71927e-05	2.74599e-05	0	9.64314e-05	0.000117364	0.000133519	0.000103679	0.000190311	0.000257664	0.000178505	1	1	0	0	0	0	0	1	1	1	1	1	2	0	0	0	0
451	Bacteria	Proteobacteria	Gammaproteobacteria	NA	NA	NA	ASV_ 1475	195	119	0	0	0	0	0	0	0	0	21	24	0.000913661	0.000681074	0	0	0	0	0	0	0	0	5.70933e-05	6.4416e-05	0.00014302	1	1	0	0	0	0	0	0	0	0	0	0	2	0	0	0	0
452	Bacteria	Chloroflexi	Anaerolineae	RBG-13-54-9	NA	NA	ASV_ 1477	0	0	73	62	0	0	0	0	0	5	0	0	0	0	0.000233101	0.00024085	0	0	0	0	0	1.67224e-05	0	0	4.08894e-05	0	0	1	1	0	0	0	0	0	0	0	0	2	0	0	0	0
453	Bacteria	Chloroflexi	Anaerolineae	Anaerolineales	Anaerolineaceae	NA	ASV_ 1480	19	0	93	77	13	14	156	174	74	75	81	70	8.90234e-05	0	0.000296964	0.00029912	5.0997e-05	5.46811e-05	0.000501443	0.000474915	0.000235248	0.000250836	0.000220217	0.00018788	0.000221777	0	0	1	1	0	0	1	1	1	1	1	1	2	0	0	0	0
454	Archaea	Crenarchaeota	Bathyarchaeia	NA	NA	NA	ASV_ 1484	0	0	110	118	0	0	0	0	0	0	0	0	0	0	0.000351248	0.000458391	0	0	0	0	0	0	0	0	6.74699e-05	0	0	1	1	0	0	0	0	0	0	0	0	2	0	0	0	0
455	Bacteria	Desulfobacterota	Desulfuromonadia	Geobacterales	Geobacteraceae	NA	ASV_ 1492	43	68	0	0	0	0	0	19	0	0	55	67	0.000201474	0.000389185	0	0	0	0	0	5.18586e-05	0	0	0.00014953	0.000179828	8.09897e-05	1	1	0	0	0	0	0	0	0	0	1	1	2	0	0	0	0
456	Archaea	Crenarchaeota	Bathyarchaeia	NA	NA	NA	ASV_ 1496	0	0	183	177	0	0	0	0	0	0	0	0	0	0	0.000584349	0.000687587	0	0	0	0	0	0	0	0	0.000105995	0	0	1	1	0	0	0	0	0	0	0	0	2	0	0	0	0
457	Bacteria	Chloroflexi	Chloroflexia	Chloroflexales	Roseiflexaceae	Roseiflexus	ASV_ 15	0	2	270	216	5	0	275	367	3708	3546	241	201	0	1.14466e-05	0.000862154	0.000839089	1.96142e-05	0	0.000883954	0.00100169	0.0117878	0.0118595	0.000655214	0.000539484	0.00237167	0	0	1	1	0	0	1	1	1	1	1	1	2	0	0	0	0
458	Bacteria	Acidobacteriota	Acidobacteriae	Bryobacterales	Bryobacteraceae	Bryobacter	ASV_ 150	71	60	0	0	503	570	38	25	29	24	865	754	0.000332666	0.000343399	0	0	0.00197319	0.0022263	0.000122146	6.8235e-05	9.21917e-05	8.02676e-05	0.0023517	0.00202374	0.000801153	1	1	0	0	1	1	1	0	0	0	1	1	2	0	0	0	0
459	Bacteria	Chloroflexi	Anaerolineae	SBR1031	NA	NA	ASV_ 1505	119	40	16	0	72	17	0	16	76	171	159	158	0.000557568	0.000228932	5.10906e-05	0	0.000282445	6.63985e-05	0	4.36704e-05	0.000241606	0.000571906	0.000432278	0.000424072	0.000241664	1	1	0	0	1	0	0	0	1	1	1	1	2	0	0	0	0
460	Bacteria	Chloroflexi	Anaerolineae	Anaerolineales	Anaerolineaceae	GWD2-49-16	ASV_ 1510	0	0	220	215	8	12	22	21	12	0	0	0	0	0	0.000702496	0.000835204	3.13828e-05	4.68695e-05	7.07164e-05	5.73174e-05	3.81483e-05	0	0	0	0.000148511	0	0	1	1	0	0	0	0	0	0	0	0	2	0	0	0	0
461	Bacteria	Chloroflexi	Anaerolineae	Anaerolineales	Anaerolineaceae	NA	ASV_ 1532	0	0	370	381	0	9	0	0	0	0	0	0	0	0	0.00118147	0.00148006	0	3.51521e-05	0	0	0	0	0	0	0.000224724	0	0	1	1	0	0	0	0	0	0	0	0	2	0	0	0	0
462	Bacteria	Bacteroidota	Bacteroidia	Chitinophagales	Saprospiraceae	Lewinella	ASV_ 1534	73	187	28	0	0	0	0	0	0	0	151	156	0.000342037	0.00107026	8.94086e-05	0	0	0	0	0	0	0	0.000410528	0.000418704	0.000194245	1	1	0	0	0	0	0	0	0	0	1	1	2	0	0	0	0
463	Archaea	Crenarchaeota	Bathyarchaeia	NA	NA	NA	ASV_ 1537	0	0	92	46	0	0	0	0	0	0	0	0	0	0	0.000293771	0.000178695	0	0	0	0	0	0	0	0	3.93722e-05	0	0	1	1	0	0	0	0	0	0	0	0	2	0	0	0	0
464	Bacteria	Nitrospirota	Nitrospiria	Nitrospirales	Nitrospiraceae	Nitrospira	ASV_ 1551	68	81	0	0	0	0	291	445	0	0	0	11	0.00031861	0.000463588	0	0	0	0	0.000935385	0.00121458	0	0	0	2.9524e-05	0.000246807	1	1	0	0	0	0	1	1	0	0	0	0	2	0	0	0	0
465	Bacteria	Planctomycetota	Phycisphaerae	Phycisphaerales	Phycisphaeraceae	SM1A02	ASV_ 1552	532	135	0	0	75	64	0	9	0	0	52	30	0.00249266	0.000772647	0	0	0.000294213	0.000249971	0	2.45646e-05	0	0	0.000141374	8.05201e-05	0.000337995	1	1	0	0	1	1	0	0	0	0	1	0	2	0	0	0	0
466	Archaea	Nanoarchaeota	Nanoarchaeia	Woesearchaeales	GW2011	AR15	ASV_ 1553	0	0	304	342	0	0	0	0	47	46	0	0	0	0	0.000970722	0.00132856	0	0	0	0	0.000149414	0.000153846	0	0	0.000216878	0	0	1	1	0	0	0	0	1	1	0	0	2	0	0	0	0
467	Bacteria	Dadabacteria	Dadabacteriia	Dadabacteriales	NA	NA	ASV_ 1559	0	0	53	31	0	0	13	20	0	0	8	0	0	0	0.000169238	0.000120425	0	0	4.17869e-05	5.4588e-05	0	0	2.17498e-05	0	3.39823e-05	0	0	1	1	0	0	0	0	0	0	0	0	2	0	0	0	0
468	Bacteria	Bacteroidota	Kapabacteria	Kapabacteriales	NA	NA	ASV_ 156	0	0	400	337	0	10	1744	831	0	0	0	0	0	0	0.00127727	0.00130913	0	3.90579e-05	0.00560588	0.00226813	0	0	0	0	0.000874956	0	0	1	1	0	0	1	1	0	0	0	0	2	0	0	0	0
469	Bacteria	Actinobacteriota	NA	NA	NA	NA	ASV_ 1568	0	0	121	91	0	0	0	0	0	0	41	0	0	0	0.000386373	0.000353505	0	0	0	0	0	0	0.000111468	0	7.09455e-05	0	0	1	1	0	0	0	0	0	0	1	0	2	0	0	0	0
470	Bacteria	Bacteroidota	Bacteroidia	Cytophagales	Microscillaceae	NA	ASV_ 1569	129	193	0	0	0	0	0	0	0	0	0	0	0.000604422	0.0011046	0	0	0	0	0	0	0	0	0	0	0.000142418	1	1	0	0	0	0	0	0	0	0	0	0	2	0	0	0	0
471	Bacteria	Proteobacteria	Gammaproteobacteria	Burkholderiales	Rhodocyclaceae	NA	ASV_ 157	418	397	19	0	488	1210	0	0	0	0	1575	1352	0.00195852	0.00227215	6.06701e-05	0	0.00191435	0.00472601	0	0	0	0	0.004282	0.00362877	0.00157021	1	1	0	0	1	1	0	0	0	0	1	1	2	0	0	0	0
472	Bacteria	Patescibacteria	Parcubacteria	NA	NA	NA	ASV_ 1571	0	0	117	131	0	0	0	0	343	206	18	50	0	0	0.0003736	0.000508892	0	0	0	0	0.00109041	0.000688963	4.89371e-05	0.0001342	0.000237083	0	0	1	1	0	0	0	0	1	1	0	1	2	0	0	0	0
473	Bacteria	Nitrospirota	Thermodesulfovibrionia	NA	NA	NA	ASV_ 1582	0	0	74	66	0	0	0	0	0	0	0	0	0	0	0.000236294	0.000256388	0	0	0	0	0	0	0	0	4.10569e-05	0	0	1	1	0	0	0	0	0	0	0	0	2	0	0	0	0
474	Bacteria	Acidobacteriota	Acidobacteriae	PAUC26f	NA	NA	ASV_ 1587	31	20	19	11	0	0	193	240	70	77	92	79	0.000145249	0.000114466	6.06701e-05	4.27314e-05	0	0	0.000620375	0.000655056	0.000222532	0.000257525	0.000250123	0.000212036	0.000215064	1	1	0	0	0	0	1	1	1	1	1	1	2	0	0	0	0
475	Bacteria	Desulfobacterota	Desulfobacteria	Desulfobacterales	Desulfosarcinaceae	Sva0081 sediment group	ASV_ 1593	0	0	189	95	0	0	15	31	64	97	38	22	0	0	0.000603508	0.000369044	0	0	4.82157e-05	8.46114e-05	0.000203458	0.000324415	0.000103312	5.9048e-05	0.000149634	0	0	1	1	0	0	0	0	1	1	1	0	2	0	0	0	0
476	Archaea	Crenarchaeota	Bathyarchaeia	NA	NA	NA	ASV_ 1594	0	0	74	73	0	0	0	0	0	0	0	0	0	0	0.000236294	0.000283581	0	0	0	0	0	0	0	0	4.33229e-05	0	0	1	1	0	0	0	0	0	0	0	0	2	0	0	0	0
477	Bacteria	Firmicutes	Symbiobacteriia	Symbiobacteriales	Caldinitratiruptor	NA	ASV_ 1595	389	391	0	0	0	0	0	0	0	0	0	0	0.00182264	0.00223782	0	0	0	0	0	0	0	0	0	0	0.000338371	1	1	0	0	0	0	0	0	0	0	0	0	2	0	0	0	0
478	Bacteria	Acidobacteriota	Aminicenantia	Aminicenantales	NA	NA	ASV_ 160	103	113	0	0	0	0	672	1214	492	589	266	313	0.000482601	0.000646734	0	0	0	0	0.00216006	0.00331349	0.00156408	0.0019699	0.000723182	0.000840093	0.000975012	1	1	0	0	0	0	1	1	1	1	1	1	2	0	0	0	0
479	Bacteria	Proteobacteria	Gammaproteobacteria	Methylococcales	Methylohalobiaceae	Methylohalobius	ASV_ 161	0	0	127	109	0	0	127	104	0	0	0	0	0	0	0.000405532	0.000423429	0	0	0.000408226	0.000283858	0	0	0	0	0.000126754	0	0	1	1	0	0	1	1	0	0	0	0	2	0	0	0	0
480	Bacteria	Bacteroidota	Bacteroidia	Chitinophagales	Saprospiraceae	NA	ASV_ 1613	0	9	39	38	0	0	0	0	0	0	20	25	0	5.15098e-05	0.000124533	0.000147618	0	0	0	0	0	0	5.43746e-05	6.71e-05	3.70946e-05	0	0	1	1	0	0	0	0	0	0	0	0	2	0	0	0	0
481	Bacteria	Synergistota	Synergistia	Synergistales	Synergistaceae	Thermanaerovibrio	ASV_ 1614	81	63	0	14	0	10	100	171	0	15	0	0	0.000379521	0.000360569	0	5.43854e-05	0	3.90579e-05	0.000321438	0.000466727	0	5.01672e-05	0	0	0.000139322	1	1	0	0	0	0	1	1	0	0	0	0	2	0	0	0	0
482	Archaea	Nanoarchaeota	Nanoarchaeia	Woesearchaeales	SCGC AAA011-D5	NA	ASV_ 1618	180	172	0	0	0	0	0	0	0	0	15	41	0.00084338	0.00098441	0	0	0	0	0	0	0	0	4.07809e-05	0.000110044	0.000164885	1	1	0	0	0	0	0	0	0	0	0	1	2	0	0	0	0
483	Bacteria	Proteobacteria	Gammaproteobacteria	Acidiferrobacterales	Acidiferrobacteraceae	Sulfurifustis	ASV_ 162	204	188	0	0	28	0	2602	4028	196	238	836	784	0.00095583	0.00107598	0	0	0.00010984	0	0.00836382	0.010994	0.000623089	0.000795987	0.00227286	0.00210426	0.00227464	1	1	0	0	1	0	1	1	1	1	1	1	2	0	0	0	0
484	Bacteria	Chloroflexi	Anaerolineae	SBR1031	NA	NA	ASV_ 1625	0	0	276	173	0	0	0	0	130	115	39	0	0	0	0.000881313	0.000672048	0	0	0	0	0.000413273	0.000384615	0.00010603	0	0.000204773	0	0	1	1	0	0	0	0	1	1	1	0	2	0	0	0	0
485	Bacteria	Proteobacteria	Gammaproteobacteria	NA	NA	NA	ASV_ 1626	138	106	0	0	0	0	0	0	0	0	0	0	0.000646591	0.000606671	0	0	0	0	0	0	0	0	0	0	0.000104439	1	1	0	0	0	0	0	0	0	0	0	0	2	0	0	0	0
486	Bacteria	Proteobacteria	Alphaproteobacteria	Rhodospirillales	Magnetospirillaceae	NA	ASV_ 1630	35	19	0	0	503	157	0	0	0	0	0	0	0.00016399	0.000108743	0	0	0.00197319	0.000613209	0	0	0	0	0	0	0.000238261	1	1	0	0	1	1	0	0	0	0	0	0	2	0	0	0	0
487	Bacteria	Nitrospirota	Nitrospiria	Nitrospirales	Nitrospiraceae	Nitrospira	ASV_ 164	50	26	25	21	0	0	1689	1099	239	163	376	288	0.000234272	0.000148806	7.98291e-05	8.15781e-05	0	0	0.00542909	0.00299961	0.000759787	0.000545151	0.00102224	0.000772993	0.00100611	1	1	0	0	0	0	1	1	1	1	1	1	2	0	0	0	0
488	Archaea	Nanoarchaeota	Nanoarchaeia	Woesearchaeales	GW2011	AR15	ASV_ 1647	0	0	92	111	27	66	0	0	0	0	0	0	0	0	0.000293771	0.000431199	0.000105917	0.000257782	0	0	0	0	0	0	9.07224e-05	0	0	1	1	1	1	0	0	0	0	0	0	2	0	0	0	0
489	Archaea	Crenarchaeota	Bathyarchaeia	NA	NA	NA	ASV_ 165	410	380	0	0	100	56	208	343	2197	1845	1611	2190	0.00192103	0.00217486	0	0	0.000392285	0.000218724	0.000668591	0.000936184	0.00698431	0.00617057	0.00437987	0.00587796	0.00247703	1	1	0	0	1	1	1	1	1	1	1	1	2	0	0	0	0
490	Bacteria	TA06	NA	NA	NA	NA	ASV_ 1664	0	0	222	237	0	0	0	0	93	64	0	0	0	0	0.000708882	0.000920667	0	0	0	0	0.000295649	0.000214047	0	0	0.00017827	0	0	1	1	0	0	0	0	1	1	0	0	2	0	0	0	0
491	Bacteria	Bacteroidota	Bacteroidia	Sphingobacteriales	NA	NA	ASV_ 1672	4	0	281	209	0	0	0	0	0	0	0	0	1.87418e-05	0	0.000897279	0.000811896	0	0	0	0	0	0	0	0	0.000143993	0	0	1	1	0	0	0	0	0	0	0	0	2	0	0	0	0
492	Bacteria	Proteobacteria	Alphaproteobacteria	Rhodospirillales	Rhodospirillaceae	NA	ASV_ 1683	186	255	0	0	0	0	0	0	0	0	39	32	0.000871492	0.00145944	0	0	0	0	0	0	0	0	0.00010603	8.58881e-05	0.000210238	1	1	0	0	0	0	0	0	0	0	1	0	2	0	0	0	0
493	Bacteria	Actinobacteriota	RBG-16-55-12	NA	NA	NA	ASV_ 1686	0	0	169	131	97	0	0	0	93	85	101	104	0	0	0.000539645	0.000508892	0.000380516	0	0	0	0.000295649	0.000284281	0.000274592	0.000279136	0.000213559	0	0	1	1	1	0	0	0	1	1	1	1	2	0	0	0	0
494	Bacteria	Acidobacteriota	Thermoanaerobaculia	Thermoanaerobaculales	Thermoanaerobaculaceae	Subgroup 10	ASV_ 1694	180	112	0	0	0	0	133	171	0	0	73	60	0.00084338	0.000641011	0	0	0	0	0.000427513	0.000466727	0	0	0.000198467	0.00016104	0.000228178	1	1	0	0	0	0	1	1	0	0	1	1	2	0	0	0	0
495	Bacteria	Nitrospirota	Thermodesulfovibrionia	NA	NA	NA	ASV_ 1701	0	0	458	339	0	0	0	0	0	0	0	0	0	0	0.00146247	0.0013169	0	0	0	0	0	0	0	0	0.000231614	0	0	1	1	0	0	0	0	0	0	0	0	2	0	0	0	0
496	Bacteria	NA	NA	NA	NA	NA	ASV_ 1703	459	337	0	0	0	0	0	0	0	0	0	0	0.00215062	0.00192876	0	0	0	0	0	0	0	0	0	0	0.000339948	1	1	0	0	0	0	0	0	0	0	0	0	2	0	0	0	0
497	Bacteria	Chloroflexi	Anaerolineae	SBR1031	NA	NA	ASV_ 1707	253	373	0	0	0	0	0	0	0	0	89	79	0.00118542	0.0021348	0	0	0	0	0	0	0	0	0.000241967	0.000212036	0.000314518	1	1	0	0	0	0	0	0	0	0	1	1	2	0	0	0	0
498	Archaea	Nanoarchaeota	Nanoarchaeia	Woesearchaeales	GW2011	AR15	ASV_ 1712	0	0	337	370	0	0	0	0	41	44	0	0	0	0	0.0010761	0.00143733	0	0	0	0	0.00013034	0.000147157	0	0	0.000232577	0	0	1	1	0	0	0	0	1	1	0	0	2	0	0	0	0
499	Bacteria	Sva0485	NA	NA	NA	NA	ASV_ 172	41	37	0	0	0	0	95	141	284	260	133	181	0.000192103	0.000211763	0	0	0	0	0.000305366	0.000384845	0.000902843	0.000869565	0.000361591	0.000485804	0.00030949	1	1	0	0	0	0	1	1	1	1	1	1	2	0	0	0	0
500	Bacteria	Proteobacteria	Gammaproteobacteria	Pseudomonadales	Moraxellaceae	NA	ASV_ 1720	163	166	0	0	0	0	0	0	0	0	0	0	0.000763727	0.00095007	0	0	0	0	0	0	0	0	0	0	0.000142816	1	1	0	0	0	0	0	0	0	0	0	0	2	0	0	0	0
501	Bacteria	Chloroflexi	Dehalococcoidia	GIF9	AB-539-J10	SCGC-AB-539-J10	ASV_ 1727	0	0	89	63	0	0	0	0	0	0	0	0	0	0	0.000284192	0.000244734	0	0	0	0	0	0	0	0	4.40772e-05	0	0	1	1	0	0	0	0	0	0	0	0	2	0	0	0	0
502	Bacteria	Chloroflexi	Anaerolineae	Anaerolineales	Anaerolineaceae	NA	ASV_ 1731	19	15	93	45	0	0	0	0	33	39	48	40	8.90234e-05	8.58497e-05	0.000296964	0.00017481	0	0	0	0	0.000104908	0.000130435	0.000130499	0.00010736	9.33208e-05	0	0	1	1	0	0	0	0	1	1	1	1	2	0	0	0	0
503	Bacteria	Proteobacteria	Gammaproteobacteria	Xanthomonadales	Rhodanobacteraceae	NA	ASV_ 1733	115	132	0	0	0	0	0	0	0	0	0	13	0.000538826	0.000755477	0	0	0	0	0	0	0	0	0	3.4892e-05	0.000110766	1	1	0	0	0	0	0	0	0	0	0	0	2	0	0	0	0
504	Bacteria	Planctomycetota	Planctomycetes	Planctomycetales	NA	NA	ASV_ 1734	38	41	0	0	0	0	309	247	0	0	78	65	0.000178047	0.000234656	0	0	0	0	0.000993243	0.000674162	0	0	0.000212061	0.00017446	0.000205552	1	1	0	0	0	0	1	1	0	0	1	1	2	0	0	0	0
505	Archaea	Crenarchaeota	Bathyarchaeia	NA	NA	NA	ASV_ 1738	0	0	70	64	0	0	0	0	0	0	0	0	0	0	0.000223521	0.000248619	0	0	0	0	0	0	0	0	3.9345e-05	0	0	1	1	0	0	0	0	0	0	0	0	2	0	0	0	0
506	Bacteria	Chloroflexi	Anaerolineae	ADurb.Bin180	NA	NA	ASV_ 1744	0	0	102	112	132	0	0	0	172	0	124	131	0	0	0.000325703	0.000435083	0.000517816	0	0	0	0.000546792	0	0.000337122	0.000351604	0.00020951	0	0	1	1	1	0	0	0	1	0	1	1	2	0	0	0	0
507	Bacteria	DTB120	NA	NA	NA	NA	ASV_ 1747	149	180	0	0	0	0	0	0	0	0	45	34	0.000698131	0.0010302	0	0	0	0	0	0	0	0	0.000122343	9.12561e-05	0.000161827	1	1	0	0	0	0	0	0	0	0	1	0	2	0	0	0	0
508	Bacteria	Patescibacteria	Microgenomatia	Candidatus Woesebacteria	NA	NA	ASV_ 1757	0	4	49	35	0	0	0	0	25	32	13	22	0	2.28932e-05	0.000156465	0.000135964	0	0	0	0	7.94756e-05	0.000107023	3.53435e-05	5.9048e-05	4.96844e-05	0	0	1	1	0	0	0	0	0	1	0	0	2	0	0	0	0
509	Bacteria	Nitrospirota	Thermodesulfovibrionia	NA	NA	NA	ASV_ 176	0	0	542	415	598	746	0	71	281	326	78	149	0	0	0.00173069	0.00161214	0.00234586	0.00291372	0	0.000193787	0.000893306	0.0010903	0.000212061	0.000399916	0.000949316	0	0	1	1	1	1	0	1	1	1	1	1	2	0	0	0	0
510	Bacteria	Bacteroidota	Bacteroidia	Chitinophagales	NA	NA	ASV_ 1761	48	49	0	0	0	4	0	0	0	0	5	13	0.000224901	0.000280442	0	0	0	1.56232e-05	0	0	0	0	1.35936e-05	3.4892e-05	4.74544e-05	1	1	0	0	0	0	0	0	0	0	0	0	2	0	0	0	0
511	Bacteria	Sva0485	NA	NA	NA	NA	ASV_ 1770	18	0	135	85	12	47	0	22	0	0	15	28	8.4338e-05	0	0.000431077	0.000330197	4.70741e-05	0.000183572	0	6.00468e-05	0	0	4.07809e-05	7.5152e-05	0.000104353	0	0	1	1	0	1	0	0	0	0	0	0	2	0	0	0	0
512	Archaea	Crenarchaeota	Bathyarchaeia	NA	NA	NA	ASV_ 1774	4	3	61	64	0	0	5	0	0	1	0	5	1.87418e-05	1.71699e-05	0.000194783	0.000248619	0	0	1.60719e-05	0	0	3.34448e-06	0	1.342e-05	4.26792e-05	0	0	1	1	0	0	0	0	0	0	0	0	2	0	0	0	0
513	Bacteria	Poribacteria	NA	NA	NA	NA	ASV_ 1779	15	16	111	100	21	27	7	17	29	33	26	33	7.02816e-05	9.1573e-05	0.000354441	0.000388467	8.23798e-05	0.000105456	2.25007e-05	4.63998e-05	9.21917e-05	0.000110368	7.06869e-05	8.85721e-05	0.000126943	0	0	1	1	0	1	0	0	0	1	0	0	2	0	0	0	0
514	Bacteria	Proteobacteria	Alphaproteobacteria	Kordiimonadales	Iodidimonadaceae	Iodidimonas	ASV_ 1780	297	43	0	0	0	0	0	0	0	0	31	25	0.00139158	0.000246102	0	0	0	0	0	0	0	0	8.42806e-05	6.71e-05	0.000149088	1	1	0	0	0	0	0	0	0	0	0	0	2	0	0	0	0
515	Archaea	Crenarchaeota	Bathyarchaeia	NA	NA	NA	ASV_ 1781	0	0	103	86	0	0	0	0	0	0	0	0	0	0	0.000328896	0.000334082	0	0	0	0	0	0	0	0	5.52481e-05	0	0	1	1	0	0	0	0	0	0	0	0	2	0	0	0	0
516	Bacteria	Chloroflexi	Anaerolineae	NA	NA	NA	ASV_ 1782	47	18	0	0	0	0	25	89	112	195	92	138	0.000220216	0.00010302	0	0	0	0	8.03595e-05	0.000242917	0.000356051	0.000652174	0.000250123	0.000370392	0.000189604	1	1	0	0	0	0	0	1	1	1	1	1	2	0	0	0	0
517	Bacteria	Planctomycetota	Planctomycetes	Pirellulales	Pirellulaceae	Thermogutta	ASV_ 1783	0	0	386	361	0	0	0	0	0	0	0	0	0	0	0.00123256	0.00140237	0	0	0	0	0	0	0	0	0.000219577	0	0	1	1	0	0	0	0	0	0	0	0	2	0	0	0	0
518	Bacteria	Chloroflexi	Chloroflexia	Chloroflexales	Chloroflexaceae	NA	ASV_ 179	59	45	0	0	1470	487	0	7	0	0	873	701	0.000276441	0.000257549	0	0	0.00576658	0.00190212	0	1.91058e-05	0	0	0.00237345	0.00188149	0.00103973	1	1	0	0	1	1	0	0	0	0	1	1	2	0	0	0	0
519	Bacteria	Sva0485	NA	NA	NA	NA	ASV_ 1802	0	0	88	51	23	0	0	16	47	66	45	42	0	0	0.000280998	0.000198118	9.02254e-05	0	0	4.36704e-05	0.000149414	0.000220736	0.000122343	0.000112728	0.000101519	0	0	1	1	0	0	0	0	1	1	1	1	2	0	0	0	0
520	Bacteria	TA06	NA	NA	NA	NA	ASV_ 1817	97	82	0	0	17	23	105	135	49	64	31	52	0.000454488	0.000469312	0	0	6.66884e-05	8.98332e-05	0.00033751	0.000368469	0.000155772	0.000214047	8.42806e-05	0.000139568	0.000198331	1	1	0	0	0	0	1	1	1	1	0	1	2	0	0	0	0
521	Bacteria	NA	NA	NA	NA	NA	ASV_ 1823	88	64	0	10	9	0	17	23	77	87	65	40	0.000412319	0.000366292	0	3.88467e-05	3.53056e-05	0	5.46445e-05	6.27762e-05	0.000244785	0.00029097	0.000176717	0.00010736	0.000149168	1	1	0	0	0	0	0	0	1	1	1	1	2	0	0	0	0
522	Bacteria	Acidobacteriota	Aminicenantia	Aminicenantales	NA	NA	ASV_ 1826	43	29	0	0	0	0	81	110	128	147	68	94	0.000201474	0.000165976	0	0	0	0	0.000260365	0.000300234	0.000406915	0.000491639	0.000184874	0.000252296	0.000188648	1	1	0	0	0	0	1	1	1	1	1	1	2	0	0	0	0
523	Bacteria	Patescibacteria	Parcubacteria	Candidatus Moranbacteria	NA	NA	ASV_ 1827	0	0	53	41	0	11	0	0	120	102	16	39	0	0	0.000169238	0.000159272	0	4.29637e-05	0	0	0.000381483	0.000341137	4.34997e-05	0.000104676	0.000103522	0	0	1	1	0	0	0	0	1	1	0	1	2	0	0	0	0
524	Archaea	Thermoplasmatota	Thermoplasmata	Marine Benthic Group D and DHVEG-1	NA	NA	ASV_ 1835	46	28	0	0	33	87	0	0	180	144	56	66	0.00021553	0.000160253	0	0	0.000129454	0.000339804	0	0	0.000572224	0.000481605	0.000152249	0.000177144	0.000185689	1	1	0	0	1	1	0	0	1	1	1	1	2	0	0	0	0
525	Bacteria	Proteobacteria	Gammaproteobacteria	NA	NA	NA	ASV_ 184	0	0	106	94	306	370	0	0	151	290	233	163	0	0	0.000338475	0.000365159	0.00120039	0.00144514	0	0	0.000480033	0.0009699	0.000633464	0.000437492	0.000489171	0	0	1	1	1	1	0	0	1	1	1	1	2	0	0	0	0
526	Bacteria	TA06	NA	NA	NA	NA	ASV_ 1844	0	0	151	165	9	46	0	0	0	0	7	17	0	0	0.000482168	0.000640971	3.53056e-05	0.000179666	0	0	0	0	1.90311e-05	4.5628e-05	0.000116897	0	0	1	1	0	1	0	0	0	0	0	0	2	0	0	0	0
527	Bacteria	Chloroflexi	Anaerolineae	Anaerolineales	Anaerolineaceae	NA	ASV_ 186	0	0	218	184	0	0	468	639	476	478	480	534	0	0	0.00069611	0.00071478	0	0	0.00150433	0.00174409	0.00151322	0.00159866	0.00130499	0.00143326	0.000875786	0	0	1	1	0	0	1	1	1	1	1	1	2	0	0	0	0
528	Archaea	Crenarchaeota	Bathyarchaeia	NA	NA	NA	ASV_ 1860	34	0	0	43	0	0	34	62	72	82	56	82	0.000159305	0	0	0.000167041	0	0	0.000109289	0.000169223	0.00022889	0.000274247	0.000152249	0.000220088	0.000123361	1	0	0	1	0	0	1	1	1	1	1	1	2	0	0	0	0
529	Bacteria	Chloroflexi	Anaerolineae	Anaerolineales	Anaerolineaceae	Bellilinea	ASV_ 1861	0	0	128	138	0	0	0	0	0	0	0	0	0	0	0.000408725	0.000536085	0	0	0	0	0	0	0	0	7.87341e-05	0	0	1	1	0	0	0	0	0	0	0	0	2	0	0	0	0
530	Bacteria	NA	NA	NA	NA	NA	ASV_ 1864	2	0	64	72	0	0	0	0	8	14	0	6	9.37089e-06	0	0.000204363	0.000279696	0	0	0	0	2.54322e-05	4.68227e-05	0	1.6104e-05	4.84824e-05	0	0	1	1	0	0	0	0	0	0	0	0	2	0	0	0	0
531	Archaea	Crenarchaeota	Bathyarchaeia	NA	NA	NA	ASV_ 187	0	0	313	245	0	0	0	0	0	0	0	0	0	0	0.00099946	0.000951745	0	0	0	0	0	0	0	0	0.0001626	0	0	1	1	0	0	0	0	0	0	0	0	2	0	0	0	0
532	Bacteria	Proteobacteria	Alphaproteobacteria	Sphingomonadales	Sphingomonadaceae	NA	ASV_ 1871	233	50	0	0	0	0	48	58	0	0	16	9	0.00109171	0.000286166	0	0	0	0	0.00015429	0.000158305	0	0	4.34997e-05	2.4156e-05	0.00014651	1	1	0	0	0	0	1	1	0	0	0	0	2	0	0	0	0
533	Bacteria	Bacteroidota	Bacteroidia	Sphingobacteriales	NA	NA	ASV_ 1879	28	27	0	0	10	25	0	0	0	0	18	57	0.000131192	0.000154529	0	0	3.92285e-05	9.76448e-05	0	0	0	0	4.89371e-05	0.000152988	5.20434e-05	1	1	0	0	0	0	0	0	0	0	0	1	2	0	0	0	0
534	Bacteria	NA	NA	NA	NA	NA	ASV_ 1882	47	46	0	0	0	0	0	0	0	0	36	57	0.000220216	0.000263272	0	0	0	0	0	0	0	0	9.78742e-05	0.000152988	6.11959e-05	1	1	0	0	0	0	0	0	0	0	0	1	2	0	0	0	0
535	Bacteria	Spirochaetota	Spirochaetia	Spirochaetales	Spirochaetaceae	NA	ASV_ 1897	0	0	38	49	0	0	0	0	0	0	0	0	0	0	0.00012134	0.000190349	0	0	0	0	0	0	0	0	2.59741e-05	0	0	1	1	0	0	0	0	0	0	0	0	2	0	0	0	0
536	Bacteria	Proteobacteria	Alphaproteobacteria	Caulobacterales	Parvularculaceae	Amphiplicatus	ASV_ 1903	118	66	0	0	0	0	34	52	0	0	30	28	0.000552882	0.000377739	0	0	0	0	0.000109289	0.000141929	0	0	8.15619e-05	7.5152e-05	0.000111546	1	1	0	0	0	0	1	1	0	0	0	0	2	0	0	0	0
537	Bacteria	Bdellovibrionota	Bdellovibrionia	Bdellovibrionales	Bdellovibrionaceae	Bdellovibrio	ASV_ 1916	0	0	152	172	4	0	17	12	53	0	0	0	0	0	0.000485361	0.000668164	1.56914e-05	0	5.46445e-05	3.27528e-05	0.000168488	0	0	0	0.000118758	0	0	1	1	0	0	0	0	1	0	0	0	2	0	0	0	0
538	Bacteria	Chloroflexi	Chloroflexia	Chloroflexales	Herpetosiphonaceae	Herpetosiphon	ASV_ 1923	0	0	311	362	0	0	0	0	0	0	0	0	0	0	0.000993074	0.00140625	0	0	0	0	0	0	0	0	0.000199944	0	0	1	1	0	0	0	0	0	0	0	0	2	0	0	0	0
539	Bacteria	10bav-F6	NA	NA	NA	NA	ASV_ 1942	0	0	37	27	0	21	0	0	38	44	40	57	0	0	0.000118147	0.000104886	0	8.20216e-05	0	0	0.000120803	0.000147157	0.000108749	0.000152988	6.95627e-05	0	0	1	1	0	0	0	0	1	1	1	1	2	0	0	0	0
540	Bacteria	NA	NA	NA	NA	NA	ASV_ 1943	0	0	342	285	0	0	0	0	0	0	0	0	0	0	0.00109206	0.00110713	0	0	0	0	0	0	0	0	0.000183266	0	0	1	1	0	0	0	0	0	0	0	0	2	0	0	0	0
541	Archaea	Crenarchaeota	Bathyarchaeia	NA	NA	NA	ASV_ 1953	0	0	99	92	0	0	0	0	0	0	0	0	0	0	0.000316123	0.00035739	0	0	0	0	0	0	0	0	5.61261e-05	0	0	1	1	0	0	0	0	0	0	0	0	2	0	0	0	0
542	Archaea	Crenarchaeota	Bathyarchaeia	NA	NA	NA	ASV_ 1955	0	0	106	65	0	0	0	0	0	0	0	0	0	0	0.000338475	0.000252504	0	0	0	0	0	0	0	0	4.92483e-05	0	0	1	1	0	0	0	0	0	0	0	0	2	0	0	0	0
543	Bacteria	Acidobacteriota	Aminicenantia	Aminicenantales	NA	NA	ASV_ 1957	0	0	75	65	0	0	0	0	0	0	0	0	0	0	0.000239487	0.000252504	0	0	0	0	0	0	0	0	4.09992e-05	0	0	1	1	0	0	0	0	0	0	0	0	2	0	0	0	0
544	Bacteria	Proteobacteria	Alphaproteobacteria	Caulobacterales	Hyphomonadaceae	Hyphomonas	ASV_ 1958	12	11	58	52	0	0	0	0	0	0	7	17	5.62253e-05	6.29564e-05	0.000185204	0.000202003	0	0	0	0	0	0	1.90311e-05	4.5628e-05	4.75873e-05	0	0	1	1	0	0	0	0	0	0	0	0	2	0	0	0	0
545	Bacteria	Chloroflexi	Anaerolineae	SBR1031	NA	NA	ASV_ 1959	76	213	0	0	0	0	0	0	0	0	122	142	0.000356094	0.00121907	0	0	0	0	0	0	0	0	0.000331685	0.000381128	0.000190664	1	1	0	0	0	0	0	0	0	0	1	1	2	0	0	0	0
546	Archaea	Crenarchaeota	Bathyarchaeia	NA	NA	NA	ASV_ 1965	0	0	109	71	0	0	0	60	32	40	59	0	0	0	0.000348055	0.000275812	0	0	0	0.000163764	0.000101729	0.000133779	0.000160405	0	9.86286e-05	0	0	1	1	0	0	0	1	1	1	1	0	2	0	0	0	0
547	Bacteria	Hydrogenedentes	Hydrogenedentia	Hydrogenedentiales	Hydrogenedensaceae	Candidatus Hydrogenedens	ASV_ 1972	0	0	85	53	31	39	0	0	39	59	0	0	0	0	0.000271419	0.000205888	0.000121608	0.000152326	0	0	0.000123982	0.000197324	0	0	8.93789e-05	0	0	1	1	1	1	0	0	1	1	0	0	2	0	0	0	0
548	Bacteria	Verrucomicrobiota	Verrucomicrobiae	Verrucomicrobiales	Rubritaleaceae	Luteolibacter	ASV_ 199	0	0	32	30	0	0	0	0	0	0	0	9	0	0	0.000102181	0.00011654	0	0	0	0	0	0	0	2.4156e-05	2.02398e-05	0	0	1	1	0	0	0	0	0	0	0	0	2	0	0	0	0
549	Bacteria	Desulfobacterota	Desulfobacteria	Desulfatiglandales	Desulfatiglandaceae	Desulfatiglans	ASV_ 1999	0	0	197	151	49	82	0	0	0	0	0	0	0	0	0.000629053	0.000586585	0.000192219	0.000320275	0	0	0	0	0	0	0.000144011	0	0	1	1	1	1	0	0	0	0	0	0	2	0	0	0	0
550	Bacteria	NA	NA	NA	NA	NA	ASV_ 2001	10	0	137	137	6	27	0	14	88	73	20	55	4.68544e-05	0	0.000437463	0.0005322	2.35371e-05	0.000105456	0	3.82116e-05	0.000279754	0.000244147	5.43746e-05	0.00014762	0.000159135	0	0	1	1	0	1	0	0	1	1	0	1	2	0	0	0	0
551	Bacteria	Chloroflexi	Dehalococcoidia	t0.6.f	NA	NA	ASV_ 2006	0	0	53	30	0	0	0	0	0	0	0	0	0	0	0.000169238	0.00011654	0	0	0	0	0	0	0	0	2.38148e-05	0	0	1	1	0	0	0	0	0	0	0	0	2	0	0	0	0
552	Bacteria	Chloroflexi	Anaerolineae	Caldilineales	Caldilineaceae	NA	ASV_ 2027	0	0	56	55	124	0	16	0	0	42	0	0	0	0	0.000178817	0.000213657	0.000486433	0	5.14301e-05	0	0	0.000140468	0	0	8.92338e-05	0	0	1	1	1	0	0	0	0	1	0	0	2	0	0	0	0
553	Bacteria	Proteobacteria	Gammaproteobacteria	Burkholderiales	Rhodocyclaceae	NA	ASV_ 2030	146	182	0	0	0	0	0	0	0	0	0	0	0.000684075	0.00104164	0	0	0	0	0	0	0	0	0	0	0.00014381	1	1	0	0	0	0	0	0	0	0	0	0	2	0	0	0	0
554	Bacteria	Proteobacteria	Gammaproteobacteria	Burkholderiales	Comamonadaceae	Tepidimonas	ASV_ 2031	68	51	10	8	59	114	0	0	0	0	0	0	0.00031861	0.000291889	3.19316e-05	3.10774e-05	0.000231448	0.00044526	0	0	0	0	0	0	0.000112518	1	1	0	0	1	1	0	0	0	0	0	0	2	0	0	0	0
555	Archaea	Crenarchaeota	Bathyarchaeia	NA	NA	NA	ASV_ 2043	0	0	38	58	0	0	0	0	0	0	0	0	0	0	0.00012134	0.000225311	0	0	0	0	0	0	0	0	2.88876e-05	0	0	1	1	0	0	0	0	0	0	0	0	2	0	0	0	0
556	Bacteria	Spirochaetota	Brevinematia	Brevinematales	Brevinemataceae	Brevinema	ASV_ 2046	0	0	113	119	20	0	0	0	46	49	0	0	0	0	0.000360828	0.000462276	7.84569e-05	0	0	0	0.000146235	0.00016388	0	0	0.000100973	0	0	1	1	0	0	0	0	1	1	0	0	2	0	0	0	0
557	Bacteria	Planctomycetota	Planctomycetes	Planctomycetales	NA	NA	ASV_ 2052	54	31	0	0	0	0	16	4	0	0	44	28	0.000253014	0.000177423	0	0	0	0	5.14301e-05	1.09176e-05	0	0	0.000119624	7.5152e-05	5.72967e-05	1	1	0	0	0	0	0	0	0	0	1	0	2	0	0	0	0
558	Bacteria	Proteobacteria	Gammaproteobacteria	Burkholderiales	Nitrosomonadaceae	MND1	ASV_ 2056	153	174	0	0	0	0	0	0	0	0	0	0	0.000716873	0.000995856	0	0	0	0	0	0	0	0	0	0	0.000142727	1	1	0	0	0	0	0	0	0	0	0	0	2	0	0	0	0
559	Archaea	Crenarchaeota	Bathyarchaeia	NA	NA	NA	ASV_ 2058	0	0	128	143	0	0	0	0	0	0	0	0	0	0	0.000408725	0.000555508	0	0	0	0	0	0	0	0	8.03528e-05	0	0	1	1	0	0	0	0	0	0	0	0	2	0	0	0	0
560	Bacteria	Chloroflexi	Anaerolineae	Anaerolineales	Anaerolineaceae	NA	ASV_ 2064	0	0	52	45	0	0	0	0	47	24	16	0	0	0	0.000166045	0.00017481	0	0	0	0	0.000149414	8.02676e-05	4.34997e-05	0	5.11697e-05	0	0	1	1	0	0	0	0	1	0	0	0	2	0	0	0	0
561	Bacteria	Planctomycetota	028H05-P-BN-P5	NA	NA	NA	ASV_ 207	489	790	9	11	67	50	0	0	0	0	2389	2984	0.00229118	0.00452142	2.87385e-05	4.27314e-05	0.000262831	0.00019529	0	0	0	0	0.00649504	0.00800906	0.00182052	1	1	0	0	1	1	0	0	0	0	1	1	2	0	0	0	0
562	Bacteria	Gemmatimonadota	BD2-11 terrestrial group	NA	NA	NA	ASV_ 2077	31	18	0	0	0	0	0	0	0	0	28	24	0.000145249	0.00010302	0	0	0	0	0	0	0	0	7.61244e-05	6.4416e-05	3.24007e-05	1	1	0	0	0	0	0	0	0	0	0	0	2	0	0	0	0
563	Bacteria	Bacteroidota	Kryptonia	Kryptoniales	BSV26	NA	ASV_ 2082	25	34	0	0	0	0	0	0	0	0	35	37	0.000117136	0.000194593	0	0	0	0	0	0	0	0	9.51555e-05	9.93081e-05	4.21827e-05	1	1	0	0	0	0	0	0	0	0	0	0	2	0	0	0	0
564	Bacteria	Chloroflexi	Anaerolineae	Anaerolineales	Anaerolineaceae	Ornatilinea	ASV_ 2083	0	0	41	39	0	0	0	0	19	11	29	19	0	0	0.00013092	0.000151502	0	0	0	0	6.04014e-05	3.67893e-05	7.88431e-05	5.0996e-05	4.24543e-05	0	0	1	1	0	0	0	0	0	0	0	0	2	0	0	0	0
565	Bacteria	Patescibacteria	WWE3	NA	NA	NA	ASV_ 2086	6	0	238	219	0	84	0	0	0	0	0	0	2.81127e-05	0	0.000759973	0.000850743	0	0.000328087	0	0	0	0	0	0	0.00016391	0	0	1	1	0	1	0	0	0	0	0	0	2	0	0	0	0
566	Bacteria	Proteobacteria	Gammaproteobacteria	Burkholderiales	Hydrogenophilaceae	NA	ASV_ 2093	0	0	79	54	0	0	0	40	0	0	77	59	0	0	0.00025226	0.000209772	0	0	0	0.000109176	0	0	0.000209342	0.000158356	7.82422e-05	0	0	1	1	0	0	0	1	0	0	1	1	2	0	0	0	0
567	Bacteria	Chloroflexi	Anaerolineae	Anaerolineales	Anaerolineaceae	NA	ASV_ 2095	118	136	0	0	0	0	0	0	0	0	0	0	0.000552882	0.00077837	0	0	0	0	0	0	0	0	0	0	0.000110938	1	1	0	0	0	0	0	0	0	0	0	0	2	0	0	0	0
568	Archaea	NA	NA	NA	NA	NA	ASV_ 2098	43	19	0	19	0	0	0	33	114	146	107	105	0.000201474	0.000108743	0	7.38088e-05	0	0	0	9.00702e-05	0.000362409	0.000488294	0.000290904	0.00028182	0.000158127	1	1	0	0	0	0	0	0	1	1	1	1	2	0	0	0	0
569	Bacteria	Proteobacteria	Gammaproteobacteria	SZB30	NA	NA	ASV_ 210	0	0	77	34	0	0	10	0	0	0	302	156	0	0	0.000245874	0.000132079	0	0	3.21438e-05	0	0	0	0.000821056	0.000418704	0.000137488	0	0	1	1	0	0	0	0	0	0	1	1	2	0	0	0	0
570	Archaea	Crenarchaeota	Bathyarchaeia	NA	NA	NA	ASV_ 2100	0	0	69	43	0	0	0	0	0	0	0	0	0	0	0.000220328	0.000167041	0	0	0	0	0	0	0	0	3.22808e-05	0	0	1	1	0	0	0	0	0	0	0	0	2	0	0	0	0
571	Archaea	Crenarchaeota	Bathyarchaeia	NA	NA	NA	ASV_ 2101	40	62	30	0	82	128	0	0	0	0	0	0	0.000187418	0.000354845	9.57949e-05	0	0.000321673	0.000499941	0	0	0	0	0	0	0.000121639	1	1	0	0	1	1	0	0	0	0	0	0	2	0	0	0	0
572	Bacteria	Planctomycetota	Planctomycetes	Pirellulales	Pirellulaceae	Thermogutta	ASV_ 2106	15	0	174	120	0	13	0	22	0	75	17	0	7.02816e-05	0	0.000555611	0.000466161	0	5.07753e-05	0	6.00468e-05	0	0.000250836	4.62184e-05	0	0.000124994	0	0	1	1	0	0	0	0	0	1	0	0	2	0	0	0	0
573	Archaea	Crenarchaeota	Bathyarchaeia	NA	NA	NA	ASV_ 2113	16	17	68	53	0	0	12	0	29	19	15	13	7.49671e-05	9.72963e-05	0.000217135	0.000205888	0	0	3.85726e-05	0	9.21917e-05	6.35452e-05	4.07809e-05	3.4892e-05	7.21057e-05	0	0	1	1	0	0	0	0	0	0	0	0	2	0	0	0	0
574	Bacteria	Planctomycetota	Planctomycetes	Gemmatales	Gemmataceae	NA	ASV_ 2119	45	40	14	4	0	0	0	0	0	0	266	168	0.000210845	0.000228932	4.47043e-05	1.55387e-05	0	0	0	0	0	0	0.000723182	0.000450912	0.00013951	1	1	0	0	0	0	0	0	0	0	1	1	2	0	0	0	0
575	Bacteria	Proteobacteria	Gammaproteobacteria	Immundisolibacterales	Immundisolibacteraceae	NA	ASV_ 2120	38	52	0	0	0	0	0	0	0	0	0	38	0.000178047	0.000297612	0	0	0	0	0	0	0	0	0	0.000101992	4.81376e-05	1	1	0	0	0	0	0	0	0	0	0	1	2	0	0	0	0
576	Bacteria	Myxococcota	Polyangia	VHS-B4-70	NA	NA	ASV_ 2128	49	56	0	0	0	0	144	108	0	0	17	0	0.000229587	0.000320505	0	0	0	0	0.000462871	0.000294775	0	0	4.62184e-05	0	0.00011283	1	1	0	0	0	0	1	1	0	0	0	0	2	0	0	0	0
577	Archaea	Crenarchaeota	Bathyarchaeia	NA	NA	NA	ASV_ 2133	0	0	41	40	0	0	0	0	0	0	0	0	0	0	0.00013092	0.000155387	0	0	0	0	0	0	0	0	2.38589e-05	0	0	1	1	0	0	0	0	0	0	0	0	2	0	0	0	0
578	Bacteria	Myxococcota	Polyangia	Nannocystales	Nannocystaceae	Nannocystis	ASV_ 2137	316	215	0	0	0	0	0	0	0	0	17	14	0.0014806	0.00123051	0	0	0	0	0	0	0	0	4.62184e-05	3.7576e-05	0.000232909	1	1	0	0	0	0	0	0	0	0	0	0	2	0	0	0	0
579	Bacteria	Desulfobacterota	Syntrophobacteria	Syntrophobacterales	NA	NA	ASV_ 2143	0	0	130	81	0	0	0	0	0	0	14	43	0	0	0.000415111	0.000314658	0	0	0	0	0	0	3.80622e-05	0.000115412	7.36037e-05	0	0	1	1	0	0	0	0	0	0	0	1	2	0	0	0	0
580	Bacteria	Proteobacteria	Alphaproteobacteria	Rhizobiales	Hyphomicrobiaceae	Pedomicrobium	ASV_ 2150	72	25	0	0	0	0	122	87	0	0	20	10	0.000337352	0.000143083	0	0	0	0	0.000392154	0.000237458	0	0	5.43746e-05	2.684e-05	9.92718e-05	1	1	0	0	0	0	1	1	0	0	0	0	2	0	0	0	0
581	Bacteria	Elusimicrobiota	Elusimicrobia	Lineage IV	NA	NA	ASV_ 2151	26	29	0	0	57	183	0	0	0	0	36	0	0.000121822	0.000165976	0	0	0.000223602	0.00071476	0	0	0	0	9.78742e-05	0	0.000110336	1	1	0	0	1	1	0	0	0	0	0	0	2	0	0	0	0
582	Bacteria	Planctomycetota	NA	NA	NA	NA	ASV_ 2152	7	0	121	97	6	14	31	29	79	81	23	28	3.27981e-05	0	0.000386373	0.000376813	2.35371e-05	5.46811e-05	9.96458e-05	7.91526e-05	0.000251143	0.000270903	6.25308e-05	7.5152e-05	0.000142727	0	0	1	1	0	0	0	0	1	1	0	0	2	0	0	0	0
583	Bacteria	Chloroflexi	Anaerolineae	SBR1031	NA	NA	ASV_ 2161	0	0	87	56	41	0	0	0	71	46	170	89	0	0	0.000277805	0.000217542	0.000160837	0	0	0	0.000225711	0.000153846	0.000462184	0.000238876	0.000144733	0	0	1	1	1	0	0	0	1	1	1	1	2	0	0	0	0
584	Bacteria	Chloroflexi	KD4-96	NA	NA	NA	ASV_ 2168	18	0	73	55	0	0	64	65	0	20	26	13	8.4338e-05	0	0.000233101	0.000213657	0	0	0.00020572	0.000177411	0	6.68896e-05	7.06869e-05	3.4892e-05	9.0558e-05	0	0	1	1	0	0	1	1	0	0	0	0	2	0	0	0	0
585	Bacteria	Chloroflexi	Anaerolineae	Anaerolineales	Anaerolineaceae	NA	ASV_ 2177	98	97	0	9	0	0	0	0	0	0	0	17	0.000459173	0.000555161	0	3.4962e-05	0	0	0	0	0	0	0	4.5628e-05	9.12437e-05	1	1	0	0	0	0	0	0	0	0	0	0	2	0	0	0	0
586	Bacteria	Proteobacteria	Alphaproteobacteria	Caulobacterales	Parvularculaceae	Amphiplicatus	ASV_ 2178	110	23	0	0	0	0	61	46	0	0	144	113	0.000515399	0.000131636	0	0	0	0	0.000196077	0.000125552	0	0	0.000391497	0.000303292	0.000138621	1	1	0	0	0	0	1	1	0	0	1	1	2	0	0	0	0
587	Bacteria	Planctomycetota	Planctomycetes	Pirellulales	Pirellulaceae	Pirellula	ASV_ 218	113	57	10	0	8	0	2728	1633	433	442	421	293	0.000529455	0.000326229	3.19316e-05	0	3.13828e-05	0	0.00876883	0.00445711	0.00137652	0.00147826	0.00114458	0.000786413	0.00157756	1	1	0	0	0	0	1	1	1	1	1	1	2	0	0	0	0
588	Archaea	Hadarchaeota	Hadarchaeia	Hadarchaeales	NA	NA	ASV_ 2180	0	0	143	89	0	0	0	0	0	0	0	0	0	0	0.000456622	0.000345736	0	0	0	0	0	0	0	0	6.68632e-05	0	0	1	1	0	0	0	0	0	0	0	0	2	0	0	0	0
589	Bacteria	Nitrospirota	Thermodesulfovibrionia	NA	NA	NA	ASV_ 2183	83	64	0	0	0	0	0	0	19	23	16	14	0.000388892	0.000366292	0	0	0	0	0	0	6.04014e-05	7.69231e-05	4.34997e-05	3.7576e-05	8.1132e-05	1	1	0	0	0	0	0	0	0	0	0	0	2	0	0	0	0
590	Bacteria	Desulfobacterota	Desulfobaccia	Desulfobaccales	Desulfobaccaceae	Desulfobacca	ASV_ 2187	11	0	42	44	16	31	0	0	24	18	0	0	5.15399e-05	0	0.000134113	0.000170926	6.27655e-05	0.00012108	0	0	7.62966e-05	6.02007e-05	0	0	5.64101e-05	0	0	1	1	0	1	0	0	0	0	0	0	2	0	0	0	0
591	Bacteria	Proteobacteria	Gammaproteobacteria	Burkholderiales	Rhodocyclaceae	Azoarcus	ASV_ 2190	48	54	0	0	0	0	25	40	0	0	36	46	0.000224901	0.000309059	0	0	0	0	8.03595e-05	0.000109176	0	0	9.78742e-05	0.000123464	7.87362e-05	1	1	0	0	0	0	0	1	0	0	0	1	2	0	0	0	0
592	Bacteria	Sumerlaeota	Sumerlaeia	Sumerlaeales	Sumerlaeaceae	Sumerlaea	ASV_ 2199	163	190	0	0	0	0	0	0	0	0	101	74	0.000763727	0.00108743	0	0	0	0	0	0	0	0	0.000274592	0.000198616	0.000193697	1	1	0	0	0	0	0	0	0	0	1	1	2	0	0	0	0
593	Bacteria	Planctomycetota	BD7-11	NA	NA	NA	ASV_ 2202	66	43	0	0	0	0	0	0	0	0	66	39	0.000309239	0.000246102	0	0	0	0	0	0	0	0	0.000179436	0.000104676	6.99545e-05	1	1	0	0	0	0	0	0	0	0	1	1	2	0	0	0	0
594	Bacteria	Spirochaetota	Spirochaetia	Spirochaetales	Spirochaetaceae	Treponema	ASV_ 2203	0	0	79	72	0	0	0	0	0	0	0	0	0	0	0.00025226	0.000279696	0	0	0	0	0	0	0	0	4.43297e-05	0	0	1	1	0	0	0	0	0	0	0	0	2	0	0	0	0
595	Bacteria	Elusimicrobiota	Elusimicrobia	Lineage IV	NA	NA	ASV_ 2213	268	150	0	0	0	0	0	0	0	0	0	0	0.0012557	0.000858497	0	0	0	0	0	0	0	0	0	0	0.000176183	1	1	0	0	0	0	0	0	0	0	0	0	2	0	0	0	0
596	Bacteria	Desulfobacterota	Desulfobaccia	Desulfobaccales	Desulfobaccaceae	Desulfobacca	ASV_ 2214	85	43	0	0	171	31	0	0	0	0	0	0	0.000398263	0.000246102	0	0	0.000670807	0.00012108	0	0	0	0	0	0	0.000119688	1	1	0	0	1	1	0	0	0	0	0	0	2	0	0	0	0
597	Bacteria	NA	NA	NA	NA	NA	ASV_ 2216	9	5	106	94	11	43	0	0	53	16	27	44	4.2169e-05	2.86166e-05	0.000338475	0.000365159	4.31513e-05	0.000167949	0	0	0.000168488	5.35117e-05	7.34057e-05	0.000118096	0.000116585	0	0	1	1	0	1	0	0	1	0	0	1	2	0	0	0	0
598	Bacteria	Synergistota	Synergistia	Synergistales	Synergistaceae	Thermovirga	ASV_ 2223	0	0	99	86	33	51	0	0	0	0	0	0	0	0	0.000316123	0.000334082	0.000129454	0.000199195	0	0	0	0	0	0	8.15712e-05	0	0	1	1	1	1	0	0	0	0	0	0	2	0	0	0	0
599	Bacteria	Chloroflexi	Chloroflexia	Chloroflexales	Herpetosiphonaceae	Herpetosiphon	ASV_ 2227	0	0	290	249	0	0	0	0	0	0	0	0	0	0	0.000926018	0.000967283	0	0	0	0	0	0	0	0	0.000157775	0	0	1	1	0	0	0	0	0	0	0	0	2	0	0	0	0
600	Bacteria	Proteobacteria	Gammaproteobacteria	Acidiferrobacterales	Acidiferrobacteraceae	Sulfurifustis	ASV_ 223	93	64	0	0	0	0	2285	3705	14	22	91	84	0.000435746	0.000366292	0	0	0	0	0.00734486	0.0101124	4.45063e-05	7.35786e-05	0.000247404	0.000225456	0.00157086	1	1	0	0	0	0	1	1	0	0	1	1	2	0	0	0	0
601	Archaea	Crenarchaeota	Bathyarchaeia	NA	NA	NA	ASV_ 2230	52	59	30	0	0	0	0	107	0	0	0	0	0.000243643	0.000337675	9.57949e-05	0	0	0	0	0.000292046	0	0	0	0	8.07633e-05	1	1	0	0	0	0	0	1	0	0	0	0	2	0	0	0	0
602	Bacteria	NA	NA	NA	NA	NA	ASV_ 2231	243	179	0	0	0	0	0	0	0	0	33	13	0.00113856	0.00102447	0	0	0	0	0	0	0	0	8.9718e-05	3.4892e-05	0.000190637	1	1	0	0	0	0	0	0	0	0	0	0	2	0	0	0	0
603	Bacteria	Verrucomicrobiota	Verrucomicrobiae	Pedosphaerales	Pedosphaeraceae	Limisphaera	ASV_ 224	110	76	15	15	0	0	2248	1867	273	311	447	369	0.000515399	0.000434972	4.78975e-05	5.82701e-05	0	0	0.00722593	0.00509579	0.000867873	0.00104013	0.00121527	0.000990397	0.00145766	1	1	0	0	0	0	1	1	1	1	1	1	2	0	0	0	0
604	Bacteria	Acidobacteriota	Acidobacteriae	Elev-16S-1166	NA	NA	ASV_ 2248	28	22	0	0	0	0	0	0	0	0	46	49	0.000131192	0.000125913	0	0	0	0	0	0	0	0	0.000125062	0.000131516	4.28069e-05	1	1	0	0	0	0	0	0	0	0	1	1	2	0	0	0	0
605	Bacteria	Chloroflexi	Anaerolineae	SBR1031	A4b	NA	ASV_ 225	48	103	4	6	7	4	283	252	82	0	14	0	0.000224901	0.000589501	1.27727e-05	2.3308e-05	2.74599e-05	1.56232e-05	0.000909669	0.000687809	0.00026068	0	3.80622e-05	0	0.000232482	1	1	0	0	0	0	1	1	1	0	0	0	2	0	0	0	0
606	Bacteria	Proteobacteria	Gammaproteobacteria	Burkholderiales	Comamonadaceae	Inhella	ASV_ 2254	212	216	0	0	0	0	0	0	0	0	0	0	0.000993314	0.00123624	0	0	0	0	0	0	0	0	0	0	0.000185796	1	1	0	0	0	0	0	0	0	0	0	0	2	0	0	0	0
607	Archaea	Crenarchaeota	Bathyarchaeia	NA	NA	NA	ASV_ 2260	30	41	0	0	0	0	15	36	40	26	31	28	0.000140563	0.000234656	0	0	0	0	4.82157e-05	9.82584e-05	0.000127161	8.69565e-05	8.42806e-05	7.5152e-05	7.46036e-05	1	1	0	0	0	0	0	0	1	0	0	0	2	0	0	0	0
608	Bacteria	Proteobacteria	Gammaproteobacteria	Pseudomonadales	Pseudohongiellaceae	Pseudohongiella	ASV_ 2274	260	265	0	0	0	0	0	0	0	0	0	0	0.00121822	0.00151668	0	0	0	0	0	0	0	0	0	0	0.000227908	1	1	0	0	0	0	0	0	0	0	0	0	2	0	0	0	0
609	Bacteria	Nitrospirota	Thermodesulfovibrionia	NA	NA	NA	ASV_ 2300	63	96	0	0	0	0	0	0	0	0	139	218	0.000295183	0.000549438	0	0	0	0	0	0	0	0	0.000377903	0.000585112	0.000150636	1	1	0	0	0	0	0	0	0	0	1	1	2	0	0	0	0
610	Bacteria	Myxococcota	Polyangia	Nannocystales	Nannocystaceae	Nannocystis	ASV_ 2304	26	20	0	0	0	0	0	0	0	0	164	135	0.000121822	0.000114466	0	0	0	0	0	0	0	0	0.000445871	0.00036234	8.70416e-05	1	1	0	0	0	0	0	0	0	0	1	1	2	0	0	0	0
611	Bacteria	Planctomycetota	OM190	NA	NA	NA	ASV_ 2318	58	38	0	0	0	0	0	0	0	0	0	0	0.000271756	0.000217486	0	0	0	0	0	0	0	0	0	0	4.07701e-05	1	1	0	0	0	0	0	0	0	0	0	0	2	0	0	0	0
612	Archaea	Thermoplasmatota	Thermoplasmata	Methanomassiliicoccales	Methanomassiliicoccaceae	NA	ASV_ 2325	7	0	45	51	15	19	0	0	0	0	0	0	3.27981e-05	0	0.000143692	0.000198118	5.88427e-05	7.42101e-05	0	0	0	0	0	0	4.23051e-05	0	0	1	1	0	0	0	0	0	0	0	0	2	0	0	0	0
613	Archaea	Nanoarchaeota	Nanoarchaeia	Woesearchaeales	GW2011_GWC1_47_15	NA	ASV_ 2345	0	0	49	78	15	26	0	0	78	92	0	0	0	0	0.000156465	0.000303004	5.88427e-05	0.000101551	0	0	0.000247964	0.000307692	0	0	9.79599e-05	0	0	1	1	0	1	0	0	1	1	0	0	2	0	0	0	0
614	Bacteria	Chloroflexi	Anaerolineae	SJA-15	NA	NA	ASV_ 2347	7	0	58	42	0	0	14	26	10	6	18	17	3.27981e-05	0	0.000185204	0.000163156	0	0	4.50013e-05	7.09644e-05	3.17902e-05	2.00669e-05	4.89371e-05	4.5628e-05	5.36288e-05	0	0	1	1	0	0	0	0	0	0	0	0	2	0	0	0	0
615	Archaea	Halobacterota	ANME-1	ANME-1b	NA	NA	ASV_ 235	222	108	0	0	508	152	2052	2759	466	552	309	218	0.00104017	0.000618118	0	0	0.00199281	0.00059368	0.00659591	0.00753041	0.00148142	0.00184615	0.000840087	0.000585112	0.00192699	1	1	0	0	1	1	1	1	1	1	1	1	2	0	0	0	0
616	Archaea	Crenarchaeota	Bathyarchaeia	NA	NA	NA	ASV_ 2351	0	0	65	52	0	0	0	0	0	0	0	0	0	0	0.000207556	0.000202003	0	0	0	0	0	0	0	0	3.41299e-05	0	0	1	1	0	0	0	0	0	0	0	0	2	0	0	0	0
617	Archaea	Crenarchaeota	Nitrososphaeria	Nitrosocaldales	Nitrosocaldaceae	NA	ASV_ 2366	0	0	331	115	0	0	0	0	0	0	0	0	0	0	0.00105694	0.000446737	0	0	0	0	0	0	0	0	0.000125306	0	0	1	1	0	0	0	0	0	0	0	0	2	0	0	0	0
618	Bacteria	Chloroflexi	OLB14	NA	NA	NA	ASV_ 237	0	0	778	594	177	58	787	524	129	159	26	19	0	0	0.00248428	0.0023075	0.000694344	0.000226536	0.00252972	0.00143021	0.000410094	0.000531773	7.06869e-05	5.0996e-05	0.000894677	0	0	1	1	1	1	1	1	1	1	0	0	2	0	0	0	0
619	Bacteria	Nitrospirota	Thermodesulfovibrionia	NA	NA	NA	ASV_ 2373	40	51	0	0	0	0	0	0	0	0	127	246	0.000187418	0.000291889	0	0	0	0	0	0	0	0	0.000345279	0.000660264	0.000123737	1	1	0	0	0	0	0	0	0	0	1	1	2	0	0	0	0
620	Bacteria	NA	NA	NA	NA	NA	ASV_ 2384	0	0	119	102	13	23	0	0	91	55	0	0	0	0	0.000379987	0.000396237	5.0997e-05	8.98332e-05	0	0	0.000289291	0.000183946	0	0	0.000115858	0	0	1	1	0	0	0	0	1	1	0	0	2	0	0	0	0
621	Bacteria	Acetothermia	Acetothermiia	NA	NA	NA	ASV_ 239	826	517	0	0	273	241	68	151	1227	1173	896	812	0.00387018	0.00295895	0	0	0.00107094	0.000941296	0.000218578	0.000412139	0.00390066	0.00392308	0.00243598	0.00217941	0.00182593	1	1	0	0	1	1	1	1	1	1	1	1	2	0	0	0	0
622	Bacteria	Proteobacteria	Alphaproteobacteria	Rhodospirillales	Magnetospiraceae	Magnetospira	ASV_ 2398	98	87	0	0	0	0	0	0	0	0	4	10	0.000459173	0.000497928	0	0	0	0	0	0	0	0	1.08749e-05	2.684e-05	8.29014e-05	1	1	0	0	0	0	0	0	0	0	0	0	2	0	0	0	0
623	Bacteria	Planctomycetota	Phycisphaerae	Tepidisphaerales	WD2101 soil group	NA	ASV_ 240	18	21	15	30	5	0	96	119	1010	1243	1039	1010	8.4338e-05	0.00012019	4.78975e-05	0.00011654	1.96142e-05	0	0.00030858	0.000324799	0.00321081	0.00415719	0.00282476	0.00271084	0.00116046	0	1	0	1	0	0	1	1	1	1	1	1	2	0	0	0	0
624	Bacteria	NA	NA	NA	NA	NA	ASV_ 2409	64	85	0	0	0	0	0	0	0	0	12	13	0.000299868	0.000486482	0	0	0	0	0	0	0	0	3.26247e-05	3.4892e-05	7.11556e-05	1	1	0	0	0	0	0	0	0	0	0	0	2	0	0	0	0
625	Archaea	Crenarchaeota	Bathyarchaeia	NA	NA	NA	ASV_ 2410	0	0	117	119	0	0	0	0	0	0	0	0	0	0	0.0003736	0.000462276	0	0	0	0	0	0	0	0	6.96563e-05	0	0	1	1	0	0	0	0	0	0	0	0	2	0	0	0	0
626	Bacteria	Spirochaetota	Spirochaetia	Spirochaetales	Spirochaetaceae	Spirochaeta	ASV_ 2416	0	0	39	37	0	0	0	0	0	0	0	0	0	0	0.000124533	0.000143733	0	0	0	0	0	0	0	0	2.23555e-05	0	0	1	1	0	0	0	0	0	0	0	0	2	0	0	0	0
627	Bacteria	Chloroflexi	Dehalococcoidia	GIF9	AB-539-J10	SCGC-AB-539-J10	ASV_ 2421	0	0	110	87	86	192	0	0	0	0	0	0	0	0	0.000351248	0.000337966	0.000337365	0.000749912	0	0	0	0	0	0	0.000148041	0	0	1	1	1	1	0	0	0	0	0	0	2	0	0	0	0
628	Archaea	Crenarchaeota	Bathyarchaeia	NA	NA	NA	ASV_ 2427	71	57	0	0	0	47	0	0	0	28	30	31	0.000332666	0.000326229	0	0	0	0.000183572	0	0	0	9.36455e-05	8.15619e-05	8.32041e-05	9.17399e-05	1	1	0	0	0	1	0	0	0	0	0	0	2	0	0	0	0
629	Bacteria	Proteobacteria	Gammaproteobacteria	Burkholderiales	Rhodocyclaceae	NA	ASV_ 2429	91	138	0	0	0	0	0	0	0	0	0	0	0.000426375	0.000789817	0	0	0	0	0	0	0	0	0	0	0.000101349	1	1	0	0	0	0	0	0	0	0	0	0	2	0	0	0	0
630	Bacteria	Proteobacteria	Gammaproteobacteria	Pseudomonadales	NA	NA	ASV_ 2430	0	0	92	77	24	49	0	0	8	0	0	0	0	0	0.000293771	0.00029912	9.41483e-05	0.000191384	0	0	2.54322e-05	0	0	0	7.53213e-05	0	0	1	1	0	1	0	0	0	0	0	0	2	0	0	0	0
631	Archaea	Crenarchaeota	Bathyarchaeia	NA	NA	NA	ASV_ 2431	0	0	56	55	0	0	0	0	0	0	0	0	0	0	0.000178817	0.000213657	0	0	0	0	0	0	0	0	3.27062e-05	0	0	1	1	0	0	0	0	0	0	0	0	2	0	0	0	0
632	Bacteria	Planctomycetota	OM190	NA	NA	NA	ASV_ 2449	226	184	0	0	0	0	0	0	0	0	0	0	0.00105891	0.00105309	0	0	0	0	0	0	0	0	0	0	0.000176	1	1	0	0	0	0	0	0	0	0	0	0	2	0	0	0	0
633	Bacteria	Verrucomicrobiota	Verrucomicrobiae	Chthoniobacterales	Terrimicrobiaceae	Terrimicrobium	ASV_ 245	29	18	14	0	0	0	0	0	0	0	0	0	0.000135878	0.00010302	4.47043e-05	0	0	0	0	0	0	0	0	0	2.36335e-05	1	1	0	0	0	0	0	0	0	0	0	0	2	0	0	0	0
634	Bacteria	Planctomycetota	Phycisphaerae	Phycisphaerales	Phycisphaeraceae	SM1A02	ASV_ 246	320	326	0	0	0	0	0	9	0	0	7	10	0.00149934	0.0018658	0	0	0	0	0	2.45646e-05	0	0	1.90311e-05	2.684e-05	0.000286298	1	1	0	0	0	0	0	0	0	0	0	0	2	0	0	0	0
635	Bacteria	Chloroflexi	Dehalococcoidia	NA	NA	NA	ASV_ 2467	90	79	0	0	0	0	32	36	93	44	31	40	0.00042169	0.000452142	0	0	0	0	0.00010286	9.82584e-05	0.000295649	0.000147157	8.42806e-05	0.00010736	0.00014245	1	1	0	0	0	0	1	0	1	1	0	1	2	0	0	0	0
636	Bacteria	Calditrichota	Calditrichia	Calditrichales	Calditrichaceae	Caldithrix	ASV_ 2468	0	0	203	117	11	0	0	0	0	0	0	54	0	0	0.000648212	0.000454507	4.31513e-05	0	0	0	0	0	0	0.000144936	0.000107567	0	0	1	1	0	0	0	0	0	0	0	1	2	0	0	0	0
637	Bacteria	Bacteroidota	Bacteroidia	Chitinophagales	Saprospiraceae	Phaeodactylibacter	ASV_ 247	0	15	1158	910	539	355	477	282	76	170	52	49	0	8.58497e-05	0.00369768	0.00353505	0.00211441	0.00138656	0.00153326	0.000769691	0.000241606	0.000568562	0.000141374	0.000131516	0.0011838	0	0	1	1	1	1	1	1	1	1	1	1	2	0	0	0	0
638	Bacteria	Planctomycetota	Planctomycetes	Pirellulales	Pirellulaceae	Thermogutta	ASV_ 2481	0	0	129	87	8	0	0	0	13	15	0	0	0	0	0.000411918	0.000337966	3.13828e-05	0	0	0	4.13273e-05	5.01672e-05	0	0	7.27302e-05	0	0	1	1	0	0	0	0	0	0	0	0	2	0	0	0	0
639	Bacteria	Proteobacteria	Gammaproteobacteria	Enterobacterales	Vibrionaceae	Vibrio	ASV_ 2483	102	127	0	0	0	0	0	0	0	0	0	0	0.000477915	0.000726861	0	0	0	0	0	0	0	0	0	0	0.000100398	1	1	0	0	0	0	0	0	0	0	0	0	2	0	0	0	0
640	Bacteria	Chloroflexi	Anaerolineae	SBR1031	A4b	NA	ASV_ 2491	28	37	0	0	4	7	0	0	0	0	13	7	0.000131192	0.000211763	0	0	1.56914e-05	2.73405e-05	0	0	0	0	3.53435e-05	1.8788e-05	3.66765e-05	1	1	0	0	0	0	0	0	0	0	0	0	2	0	0	0	0
641	Bacteria	Myxococcota	Myxococcia	Myxococcales	Myxococcaceae	P3OB-42	ASV_ 2500	95	59	0	0	0	0	8	23	0	0	35	18	0.000445117	0.000337675	0	0	0	0	2.5715e-05	6.27762e-05	0	0	9.51555e-05	4.8312e-05	8.45626e-05	1	1	0	0	0	0	0	0	0	0	0	0	2	0	0	0	0
642	Archaea	Crenarchaeota	Bathyarchaeia	NA	NA	NA	ASV_ 2501	0	0	66	71	0	0	0	0	0	0	0	0	0	0	0.000210749	0.000275812	0	0	0	0	0	0	0	0	4.05467e-05	0	0	1	1	0	0	0	0	0	0	0	0	2	0	0	0	0
643	Bacteria	Sva0485	NA	NA	NA	NA	ASV_ 2505	0	0	54	58	0	0	6	0	37	41	51	71	0	0	0.000172431	0.000225311	0	0	1.92863e-05	0	0.000117624	0.000137124	0.000138655	0.000190564	8.34163e-05	0	0	1	1	0	0	0	0	1	1	1	1	2	0	0	0	0
644	Bacteria	Bacteroidota	Rhodothermia	Rhodothermales	Rhodothermaceae	NA	ASV_ 251	0	0	734	582	0	0	0	0	321	100	28	0	0	0	0.00234378	0.00226088	0	0	0	0	0.00102047	0.000334448	7.61244e-05	0	0.000502975	0	0	1	1	0	0	0	0	1	1	0	0	2	0	0	0	0
645	Bacteria	Spirochaetota	Brachyspirae	Brachyspirales	Brachyspirales Incertae Sedis	Exilispira	ASV_ 2512	0	0	206	180	0	51	0	0	0	0	0	0	0	0	0.000657792	0.000699241	0	0.000199195	0	0	0	0	0	0	0.000129686	0	0	1	1	0	1	0	0	0	0	0	0	2	0	0	0	0
646	Bacteria	Planctomycetota	Phycisphaerae	Phycisphaerales	Phycisphaeraceae	SM1A02	ASV_ 2515	361	55	0	0	33	0	0	0	0	0	0	0	0.00169144	0.000314782	0	0	0.000129454	0	0	0	0	0	0	0	0.000177973	1	1	0	0	1	0	0	0	0	0	0	0	2	0	0	0	0
647	Bacteria	Planctomycetota	Pla4 lineage	NA	NA	NA	ASV_ 2522	0	0	83	112	0	0	0	0	0	0	0	0	0	0	0.000265033	0.000435083	0	0	0	0	0	0	0	0	5.8343e-05	0	0	1	1	0	0	0	0	0	0	0	0	2	0	0	0	0
648	Bacteria	Spirochaetota	Spirochaetia	Spirochaetales	Spirochaetaceae	Spirochaeta	ASV_ 253	0	0	727	631	58	92	0	0	514	458	193	244	0	0	0.00232143	0.00245123	0.000227525	0.000359333	0	0	0.00163402	0.00153177	0.000524715	0.000654896	0.000808743	0	0	1	1	1	1	0	0	1	1	1	1	2	0	0	0	0
649	Archaea	Thermoplasmatota	Thermoplasmata	Marine Benthic Group D and DHVEG-1	NA	NA	ASV_ 2544	69	73	0	0	91	133	0	0	0	0	0	0	0.000323296	0.000417802	0	0	0.000356979	0.00051947	0	0	0	0	0	0	0.000134796	1	1	0	0	1	1	0	0	0	0	0	0	2	0	0	0	0
650	Bacteria	Actinobacteriota	Coriobacteriia	CG2-30-50-142	NA	NA	ASV_ 2559	55	32	9	0	29	0	46	0	0	0	57	42	0.000257699	0.000183146	2.87385e-05	0	0.000113763	0	0.000147861	0	0	0	0.000154968	0.000112728	8.3242e-05	1	1	0	0	1	0	1	0	0	0	1	1	2	0	0	0	0
651	Bacteria	Planctomycetota	NA	NA	NA	NA	ASV_ 2566	34	28	7	0	11	13	11	30	55	68	43	33	0.000159305	0.000160253	2.23521e-05	0	4.31513e-05	5.07753e-05	3.53582e-05	8.1882e-05	0.000174846	0.000227425	0.000116905	8.85721e-05	9.67354e-05	1	1	0	0	0	0	0	0	1	1	1	0	2	0	0	0	0
652	Archaea	Crenarchaeota	Bathyarchaeia	NA	NA	NA	ASV_ 2573	0	0	97	76	0	0	0	0	0	0	0	0	0	0	0.000309737	0.000295235	0	0	0	0	0	0	0	0	5.04143e-05	0	0	1	1	0	0	0	0	0	0	0	0	2	0	0	0	0
653	Bacteria	Chloroflexi	Dehalococcoidia	FS117-23B-02	NA	NA	ASV_ 2574	30	19	0	0	10	21	59	69	86	75	37	25	0.000140563	0.000108743	0	0	3.92285e-05	8.20216e-05	0.000189648	0.000188329	0.000273396	0.000250836	0.000100593	6.71e-05	0.000120038	1	1	0	0	0	0	1	1	1	1	1	0	2	0	0	0	0
654	Archaea	Micrarchaeota	Micrarchaeia	Micrarchaeales	NA	NA	ASV_ 2576	0	0	171	191	0	0	0	0	54	21	0	0	0	0	0.000546031	0.000741972	0	0	0	0	0.000171667	7.02341e-05	0	0	0.000127492	0	0	1	1	0	0	0	0	1	0	0	0	2	0	0	0	0
655	Bacteria	Proteobacteria	Gammaproteobacteria	Acidiferrobacterales	Acidiferrobacteraceae	Sulfurifustis	ASV_ 259	612	413	0	0	0	0	1217	1980	176	180	629	489	0.00286749	0.00236373	0	0	0	0	0.0039119	0.00540421	0.000559508	0.000602007	0.00171008	0.00131248	0.00156095	1	1	0	0	0	0	1	1	1	1	1	1	2	0	0	0	0
656	Archaea	Crenarchaeota	Bathyarchaeia	NA	NA	NA	ASV_ 2590	0	0	50	59	0	0	0	0	0	0	0	0	0	0	0.000159658	0.000229196	0	0	0	0	0	0	0	0	3.24045e-05	0	0	1	1	0	0	0	0	0	0	0	0	2	0	0	0	0
657	Archaea	Crenarchaeota	Bathyarchaeia	NA	NA	NA	ASV_ 2608	0	0	88	68	0	0	0	0	0	0	0	0	0	0	0.000280998	0.000264158	0	0	0	0	0	0	0	0	4.54297e-05	0	0	1	1	0	0	0	0	0	0	0	0	2	0	0	0	0
658	Archaea	Crenarchaeota	Bathyarchaeia	NA	NA	NA	ASV_ 2611	0	0	82	87	0	0	0	0	0	0	0	9	0	0	0.000261839	0.000337966	0	0	0	0	0	0	0	2.4156e-05	5.19968e-05	0	0	1	1	0	0	0	0	0	0	0	0	2	0	0	0	0
659	Bacteria	Chloroflexi	Dehalococcoidia	661239	NA	NA	ASV_ 2617	79	68	0	0	0	4	32	44	53	72	32	36	0.00037015	0.000389185	0	0	0	1.56232e-05	0.00010286	0.000120094	0.000168488	0.000240803	8.69993e-05	9.66241e-05	0.000132569	1	1	0	0	0	0	1	1	1	1	0	0	2	0	0	0	0
660	Bacteria	Chloroflexi	Anaerolineae	Anaerolineales	Anaerolineaceae	Ornatilinea	ASV_ 2618	0	0	64	57	0	49	0	0	0	0	0	0	0	0	0.000204363	0.000221426	0	0.000191384	0	0	0	0	0	0	5.14311e-05	0	0	1	1	0	1	0	0	0	0	0	0	2	0	0	0	0
661	Bacteria	Planctomycetota	Pla4 lineage	NA	NA	NA	ASV_ 2621	31	53	0	0	0	0	20	11	0	0	78	98	0.000145249	0.000303336	0	0	0	0	6.42876e-05	3.00234e-05	0	0	0.000212061	0.000263032	8.48324e-05	1	1	0	0	0	0	0	0	0	0	1	1	2	0	0	0	0
662	Bacteria	Sumerlaeota	Sumerlaeia	Sumerlaeales	Sumerlaeaceae	Sumerlaea	ASV_ 2622	0	0	215	212	0	0	0	0	0	0	0	0	0	0	0.00068653	0.00082355	0	0	0	0	0	0	0	0	0.00012584	0	0	1	1	0	0	0	0	0	0	0	0	2	0	0	0	0
663	Archaea	Crenarchaeota	Bathyarchaeia	NA	NA	NA	ASV_ 2630	0	0	58	29	0	0	0	0	0	0	0	0	0	0	0.000185204	0.000112655	0	0	0	0	0	0	0	0	2.48216e-05	0	0	1	1	0	0	0	0	0	0	0	0	2	0	0	0	0
664	Bacteria	Myxococcota	Polyangia	Blfdi19	NA	NA	ASV_ 2665	0	0	64	47	215	51	0	0	0	0	0	0	0	0	0.000204363	0.00018258	0.000843412	0.000199195	0	0	0	0	0	0	0.000119129	0	0	1	1	1	1	0	0	0	0	0	0	2	0	0	0	0
665	Bacteria	Bdellovibrionota	Oligoflexia	0319-6G20	NA	NA	ASV_ 2681	178	206	0	0	0	0	0	0	0	0	0	0	0.000834009	0.001179	0	0	0	0	0	0	0	0	0	0	0.000167751	1	1	0	0	0	0	0	0	0	0	0	0	2	0	0	0	0
666	Bacteria	Bdellovibrionota	Bdellovibrionia	Bdellovibrionales	Bdellovibrionaceae	Bdellovibrio	ASV_ 2683	0	6	141	130	0	0	0	0	0	29	46	51	0	3.43399e-05	0.000450236	0.000505007	0	0	0	0	0	9.699e-05	0.000125062	0.000136884	0.000112377	0	0	1	1	0	0	0	0	0	0	1	1	2	0	0	0	0
667	Archaea	Crenarchaeota	Bathyarchaeia	NA	NA	NA	ASV_ 2692	0	0	74	48	0	0	0	0	0	0	0	0	0	0	0.000236294	0.000186464	0	0	0	0	0	0	0	0	3.52299e-05	0	0	1	1	0	0	0	0	0	0	0	0	2	0	0	0	0
668	Bacteria	Acidobacteriota	Aminicenantia	Aminicenantales	NA	NA	ASV_ 2701	0	0	52	31	0	0	0	0	0	0	0	0	0	0	0.000166045	0.000120425	0	0	0	0	0	0	0	0	2.38724e-05	0	0	1	1	0	0	0	0	0	0	0	0	2	0	0	0	0
669	Bacteria	Actinobacteriota	Thermoleophilia	Gaiellales	NA	NA	ASV_ 2706	57	24	0	0	9	0	92	89	19	23	56	17	0.00026707	0.000137359	0	0	3.53056e-05	0	0.000295723	0.000242917	6.04014e-05	7.69231e-05	0.000152249	4.5628e-05	0.000109465	1	1	0	0	0	0	1	1	0	0	1	0	2	0	0	0	0
670	Bacteria	Bacteroidota	Bacteroidia	Chitinophagales	Saprospiraceae	Haliscomenobacter	ASV_ 272	52	42	0	0	0	0	0	0	0	0	0	0	0.000243643	0.000240379	0	0	0	0	0	0	0	0	0	0	4.03352e-05	1	1	0	0	0	0	0	0	0	0	0	0	2	0	0	0	0
671	Bacteria	Spirochaetota	Spirochaetia	Spirochaetales	Spirochaetaceae	NA	ASV_ 2723	0	0	96	89	7	0	0	0	0	0	0	0	0	0	0.000306544	0.000345736	2.74599e-05	0	0	0	0	0	0	0	5.6645e-05	0	0	1	1	0	0	0	0	0	0	0	0	2	0	0	0	0
672	Bacteria	NA	NA	NA	NA	NA	ASV_ 2729	131	190	5	0	0	0	0	0	0	0	0	0	0.000613793	0.00108743	1.59658e-05	0	0	0	0	0	0	0	0	0	0.000143099	1	1	0	0	0	0	0	0	0	0	0	0	2	0	0	0	0
673	Archaea	Crenarchaeota	Bathyarchaeia	NA	NA	NA	ASV_ 2747	49	34	0	0	0	0	70	80	69	58	0	0	0.000229587	0.000194593	0	0	0	0	0.000225007	0.000218352	0.000219353	0.00019398	0	0	0.000106739	1	1	0	0	0	0	1	1	1	1	0	0	2	0	0	0	0
674	Bacteria	NA	NA	NA	NA	NA	ASV_ 2752	31	26	0	0	0	20	27	56	0	0	39	72	0.000145249	0.000148806	0	0	0	7.81158e-05	8.67883e-05	0.000152846	0	0	0.00010603	0.000193248	7.59237e-05	1	1	0	0	0	0	0	1	0	0	1	1	2	0	0	0	0
675	Bacteria	Verrucomicrobiota	Verrucomicrobiae	Opitutales	Opitutaceae	Cephaloticoccus	ASV_ 2763	86	76	0	0	0	0	0	0	0	0	0	0	0.000402948	0.000434972	0	0	0	0	0	0	0	0	0	0	6.98267e-05	1	1	0	0	0	0	0	0	0	0	0	0	2	0	0	0	0
676	Bacteria	Bacteroidota	Bacteroidia	Bacteroidales	SB-5	NA	ASV_ 2774	0	0	90	94	0	0	0	0	0	0	0	0	0	0	0.000287385	0.000365159	0	0	0	0	0	0	0	0	5.43787e-05	0	0	1	1	0	0	0	0	0	0	0	0	2	0	0	0	0
677	Bacteria	MBNT15	NA	NA	NA	NA	ASV_ 2811	0	0	153	138	0	0	0	0	0	0	0	0	0	0	0.000488554	0.000536085	0	0	0	0	0	0	0	0	8.53866e-05	0	0	1	1	0	0	0	0	0	0	0	0	2	0	0	0	0
678	Bacteria	Proteobacteria	Gammaproteobacteria	NA	NA	NA	ASV_ 2815	71	71	0	0	0	0	41	70	19	24	47	32	0.000332666	0.000406355	0	0	0	0	0.00013179	0.000191058	6.04014e-05	8.02676e-05	0.00012778	8.58881e-05	0.000118017	1	1	0	0	0	0	1	1	0	0	1	0	2	0	0	0	0
679	Bacteria	Nitrospirota	Thermodesulfovibrionia	NA	NA	NA	ASV_ 2825	0	0	208	175	0	0	0	0	0	0	0	0	0	0	0.000664178	0.000679818	0	0	0	0	0	0	0	0	0.000112	0	0	1	1	0	0	0	0	0	0	0	0	2	0	0	0	0
680	Bacteria	Firmicutes	D8A-2	NA	NA	NA	ASV_ 2830	0	0	193	122	0	0	0	0	0	0	0	0	0	0	0.000616281	0.00047393	0	0	0	0	0	0	0	0	9.08509e-05	0	0	1	1	0	0	0	0	0	0	0	0	2	0	0	0	0
681	Bacteria	Proteobacteria	Alphaproteobacteria	Rhodospirillales	NA	NA	ASV_ 2831	97	148	0	0	0	0	3	0	0	0	0	0	0.000454488	0.00084705	0	0	0	0	9.64314e-06	0	0	0	0	0	0.000109265	1	1	0	0	0	0	0	0	0	0	0	0	2	0	0	0	0
682	Bacteria	Chloroflexi	Anaerolineae	SBR1031	NA	NA	ASV_ 2841	0	0	82	54	0	0	0	0	0	0	0	0	0	0	0.000261839	0.000209772	0	0	0	0	0	0	0	0	3.9301e-05	0	0	1	1	0	0	0	0	0	0	0	0	2	0	0	0	0
683	Bacteria	NA	NA	NA	NA	NA	ASV_ 285	113	54	0	0	438	650	0	0	0	0	0	0	0.000529455	0.000309059	0	0	0.00171821	0.00253876	0	0	0	0	0	0	0.000424624	1	1	0	0	1	1	0	0	0	0	0	0	2	0	0	0	0
684	Bacteria	Chloroflexi	Anaerolineae	SBR1031	NA	NA	ASV_ 2857	10	0	123	65	0	0	0	0	40	28	0	0	4.68544e-05	0	0.000392759	0.000252504	0	0	0	0	0.000127161	9.36455e-05	0	0	7.6077e-05	0	0	1	1	0	0	0	0	1	0	0	0	2	0	0	0	0
685	Bacteria	Planctomycetota	NA	NA	NA	NA	ASV_ 2858	0	0	149	145	0	0	0	0	0	0	59	0	0	0	0.000475781	0.000563277	0	0	0	0	0	0	0.000160405	0	9.99553e-05	0	0	1	1	0	0	0	0	0	0	1	0	2	0	0	0	0
686	Bacteria	Planctomycetota	Planctomycetes	Planctomycetales	NA	NA	ASV_ 286	99	98	0	0	3	0	1995	1694	0	0	346	413	0.000463859	0.000560885	0	0	1.17685e-05	0	0.00641269	0.0046236	0	0	0.00094068	0.00110849	0.00117683	1	1	0	0	0	0	1	1	0	0	1	1	2	0	0	0	0
687	Bacteria	Bacteroidota	Bacteroidia	Cytophagales	Microscillaceae	NA	ASV_ 289	105	117	0	0	14	8	1100	560	37	35	14	19	0.000491971	0.000669628	0	0	5.49198e-05	3.12463e-05	0.00353582	0.00152846	0.000117624	0.000117057	3.80622e-05	5.0996e-05	0.000552982	1	1	0	0	0	0	1	1	1	1	0	0	2	0	0	0	0
688	Bacteria	Planctomycetota	NA	NA	NA	NA	ASV_ 2891	15	0	32	33	56	29	0	0	18	11	13	13	7.02816e-05	0	0.000102181	0.000128194	0.000219679	0.000113268	0	0	5.72224e-05	3.67893e-05	3.53435e-05	3.4892e-05	6.64876e-05	0	0	1	1	1	1	0	0	0	0	0	0	2	0	0	0	0
689	Bacteria	Chloroflexi	Dehalococcoidia	GIF9	AB-539-J10	SCGC-AB-539-J10	ASV_ 2893	40	45	0	0	0	0	17	0	93	59	74	42	0.000187418	0.000257549	0	0	0	0	5.46445e-05	0	0.000295649	0.000197324	0.000201186	0.000112728	0.000108875	1	1	0	0	0	0	0	0	1	1	1	1	2	0	0	0	0
690	Bacteria	NB1-j	NA	NA	NA	NA	ASV_ 2897	31	31	0	0	0	0	14	26	0	0	33	47	0.000145249	0.000177423	0	0	0	0	4.50013e-05	7.09644e-05	0	0	8.9718e-05	0.000126148	5.45419e-05	1	1	0	0	0	0	0	0	0	0	0	1	2	0	0	0	0
691	Bacteria	Planctomycetota	Phycisphaerae	Phycisphaerales	Phycisphaeraceae	I-8	ASV_ 2912	95	115	0	0	0	0	0	0	0	0	28	19	0.000445117	0.000658181	0	0	0	0	0	0	0	0	7.61244e-05	5.0996e-05	0.000102535	1	1	0	0	0	0	0	0	0	0	0	0	2	0	0	0	0
692	Bacteria	Proteobacteria	Alphaproteobacteria	NA	NA	NA	ASV_ 2923	48	67	0	0	0	0	0	0	0	0	0	0	0.000224901	0.000383462	0	0	0	0	0	0	0	0	0	0	5.06969e-05	1	1	0	0	0	0	0	0	0	0	0	0	2	0	0	0	0
693	Archaea	Crenarchaeota	Bathyarchaeia	NA	NA	NA	ASV_ 2924	0	0	71	64	0	0	0	0	0	0	0	0	0	0	0.000226715	0.000248619	0	0	0	0	0	0	0	0	3.96111e-05	0	0	1	1	0	0	0	0	0	0	0	0	2	0	0	0	0
694	Bacteria	Verrucomicrobiota	Verrucomicrobiae	Opitutales	Opitutaceae	Lacunisphaera	ASV_ 2937	165	143	0	0	0	0	0	0	0	0	0	0	0.000773098	0.000818434	0	0	0	0	0	0	0	0	0	0	0.000132628	1	1	0	0	0	0	0	0	0	0	0	0	2	0	0	0	0
695	Archaea	Halobacterota	Methanomicrobia	Methanomicrobiales	Methanoregulaceae	Methanolinea	ASV_ 295	0	0	33	40	0	0	3	0	0	0	0	0	0	0	0.000105374	0.000155387	0	0	9.64314e-06	0	0	0	0	0	2.25337e-05	0	0	1	1	0	0	0	0	0	0	0	0	2	0	0	0	0
696	Bacteria	Thermotogota	Thermotogae	Thermotogales	Thermotogaceae	Pseudothermotoga	ASV_ 2951	0	0	66	44	0	23	0	0	0	0	0	0	0	0	0.000210749	0.000170926	0	8.98332e-05	0	0	0	0	0	0	3.92923e-05	0	0	1	1	0	0	0	0	0	0	0	0	2	0	0	0	0
697	Bacteria	Bacteroidota	Bacteroidia	Cytophagales	Cyclobacteriaceae	Ekhidna	ASV_ 2959	63	55	0	0	0	0	0	0	0	0	55	67	0.000295183	0.000314782	0	0	0	0	0	0	0	0	0.00014953	0.000179828	7.82769e-05	1	1	0	0	0	0	0	0	0	0	1	1	2	0	0	0	0
698	Bacteria	Desulfobacterota	Desulfuromonadia	Desulfuromonadales	Geothermobacteraceae	Geothermobacter	ASV_ 296	486	554	23	18	0	0	26	49	0	0	129	137	0.00227713	0.00317071	7.34428e-05	6.99241e-05	0	0	8.35739e-05	0.000133741	0	0	0.000350716	0.000367708	0.000543912	1	1	0	0	0	0	0	1	0	0	1	1	2	0	0	0	0
699	Bacteria	Armatimonadota	NA	NA	NA	NA	ASV_ 2960	0	0	100	81	0	0	0	0	0	0	0	0	0	0	0.000319316	0.000314658	0	0	0	0	0	0	0	0	5.28312e-05	0	0	1	1	0	0	0	0	0	0	0	0	2	0	0	0	0
700	Bacteria	Desulfobacterota	Desulfovibrionia	Desulfovibrionales	Desulfovibrionaceae	Desulfovibrio	ASV_ 2968	30	40	0	0	0	0	0	0	0	0	38	29	0.000140563	0.000228932	0	0	0	0	0	0	0	0	0.000103312	7.78361e-05	4.5887e-05	1	1	0	0	0	0	0	0	0	0	1	0	2	0	0	0	0
701	Bacteria	Proteobacteria	Alphaproteobacteria	Defluviicoccales	Defluviicoccaceae	Defluviicoccus	ASV_ 2987	62	45	0	0	0	0	0	0	0	0	84	66	0.000290497	0.000257549	0	0	0	0	0	0	0	0	0.000228373	0.000177144	7.94637e-05	1	1	0	0	0	0	0	0	0	0	1	1	2	0	0	0	0
702	Bacteria	Proteobacteria	Alphaproteobacteria	Ferrovibrionales	NA	NA	ASV_ 2992	69	75	0	4	0	0	0	0	0	0	0	0	0.000323296	0.000429248	0	1.55387e-05	0	0	0	0	0	0	0	0	6.40069e-05	1	1	0	0	0	0	0	0	0	0	0	0	2	0	0	0	0
703	Bacteria	Armatimonadota	NA	NA	NA	NA	ASV_ 3002	0	0	54	31	0	0	0	0	0	0	0	0	0	0	0.000172431	0.000120425	0	0	0	0	0	0	0	0	2.44046e-05	0	0	1	1	0	0	0	0	0	0	0	0	2	0	0	0	0
704	Bacteria	Chloroflexi	Anaerolineae	ADurb.Bin180	NA	NA	ASV_ 3006	0	0	44	34	16	0	0	13	40	29	52	36	0	0	0.000140499	0.000132079	6.27655e-05	0	0	3.54822e-05	0.000127161	9.699e-05	0.000141374	9.66241e-05	6.94146e-05	0	0	1	1	0	0	0	0	1	0	1	0	2	0	0	0	0
705	Bacteria	Proteobacteria	Gammaproteobacteria	Burkholderiales	Rhodocyclaceae	Azoarcus	ASV_ 3007	174	178	0	0	0	0	0	0	0	0	0	0	0.000815267	0.00101875	0	0	0	0	0	0	0	0	0	0	0.000152835	1	1	0	0	0	0	0	0	0	0	0	0	2	0	0	0	0
706	Bacteria	Nitrospirota	Nitrospiria	Nitrospirales	Nitrospiraceae	Nitrospira	ASV_ 3011	77	69	0	0	0	0	0	0	0	0	0	0	0.000360779	0.000394909	0	0	0	0	0	0	0	0	0	0	6.2974e-05	1	1	0	0	0	0	0	0	0	0	0	0	2	0	0	0	0
707	Bacteria	Proteobacteria	Alphaproteobacteria	Sphingomonadales	Sphingomonadaceae	Altererythrobacter	ASV_ 3012	0	0	46	26	44	14	37	42	0	0	0	0	0	0	0.000146886	0.000101001	0.000172605	5.46811e-05	0.000118932	0.000114635	0	0	0	0	5.90617e-05	0	0	1	1	1	0	1	1	0	0	0	0	2	0	0	0	0
708	Bacteria	Nitrospinota	Nitrospinia	Nitrospinales	Nitrospinaceae	Nitrospina	ASV_ 3017	138	98	0	0	0	0	0	0	0	0	0	0	0.000646591	0.000560885	0	0	0	0	0	0	0	0	0	0	0.000100623	1	1	0	0	0	0	0	0	0	0	0	0	2	0	0	0	0
709	Bacteria	Firmicutes	NA	NA	NA	NA	ASV_ 3019	78	66	0	0	0	0	53	75	0	0	41	37	0.000365465	0.000377739	0	0	0	0	0.000170362	0.000204705	0	0	0.000111468	9.93081e-05	0.000110754	1	1	0	0	0	0	1	1	0	0	1	0	2	0	0	0	0
710	Bacteria	Proteobacteria	Alphaproteobacteria	Rickettsiales	SM2D12	NA	ASV_ 3022	167	182	0	0	0	0	0	0	0	0	0	0	0.000782469	0.00104164	0	0	0	0	0	0	0	0	0	0	0.000152009	1	1	0	0	0	0	0	0	0	0	0	0	2	0	0	0	0
711	Bacteria	Proteobacteria	Alphaproteobacteria	Rhodospirillales	Magnetospirillaceae	Magnetospirillum	ASV_ 3037	99	79	0	0	0	0	0	0	0	0	0	0	0.000463859	0.000452142	0	0	0	0	0	0	0	0	0	0	7.63334e-05	1	1	0	0	0	0	0	0	0	0	0	0	2	0	0	0	0
712	Archaea	Crenarchaeota	Bathyarchaeia	NA	NA	NA	ASV_ 3045	0	0	41	39	0	0	0	28	15	0	0	11	0	0	0.00013092	0.000151502	0	0	0	7.64232e-05	4.76854e-05	0	0	2.9524e-05	3.63379e-05	0	0	1	1	0	0	0	0	0	0	0	0	2	0	0	0	0
713	Bacteria	Desulfobacterota	Desulfobacteria	Desulfobacterales	Desulfosarcinaceae	NA	ASV_ 3066	0	0	44	43	0	0	0	0	16	29	52	39	0	0	0.000140499	0.000167041	0	0	0	0	5.08644e-05	9.699e-05	0.000141374	0.000104676	5.84537e-05	0	0	1	1	0	0	0	0	0	0	1	1	2	0	0	0	0
714	Archaea	NA	NA	NA	NA	NA	ASV_ 3073	0	0	58	46	0	0	0	0	0	0	0	0	0	0	0.000185204	0.000178695	0	0	0	0	0	0	0	0	3.03249e-05	0	0	1	1	0	0	0	0	0	0	0	0	2	0	0	0	0
715	Bacteria	Patescibacteria	Microgenomatia	Candidatus Woesebacteria	NA	NA	ASV_ 3091	0	0	67	74	12	0	0	0	36	33	0	0	0	0	0.000213942	0.000287466	4.70741e-05	0	0	0	0.000114445	0.000110368	0	0	6.44412e-05	0	0	1	1	0	0	0	0	1	1	0	0	2	0	0	0	0
716	Bacteria	Desulfobacterota	Desulfobacteria	Desulfobacterales	NA	NA	ASV_ 31	84	98	3	0	36	243	0	0	4530	3063	1625	2812	0.000393577	0.000560885	9.57949e-06	0	0.000141222	0.000949108	0	0	0.014401	0.0102441	0.00441793	0.00754741	0.00322207	1	1	0	0	1	1	0	0	1	1	1	1	2	0	0	0	0
717	Archaea	Crenarchaeota	Bathyarchaeia	NA	NA	NA	ASV_ 310	21	0	345	283	26	0	0	10	0	0	0	0	9.83943e-05	0	0.00110164	0.00109936	0.000101994	0	0	2.7294e-05	0	0	0	0	0.000202391	0	0	1	1	1	0	0	0	0	0	0	0	2	0	0	0	0
718	Bacteria	Proteobacteria	Alphaproteobacteria	Ferrovibrionales	Ferrovibrionaceae	Ferrovibrio	ASV_ 3119	81	55	0	0	0	0	15	9	0	0	29	26	0.000379521	0.000314782	0	0	0	0	4.82157e-05	2.45646e-05	0	0	7.88431e-05	6.9784e-05	7.63092e-05	1	1	0	0	0	0	0	0	0	0	0	0	2	0	0	0	0
719	Bacteria	Bacteroidota	Bacteroidia	Cytophagales	Microscillaceae	OLB12	ASV_ 312	61	54	0	0	697	665	113	107	0	0	0	0	0.000285812	0.000309059	0	0	0.00273422	0.00259735	0.000363225	0.000292046	0	0	0	0	0.000548476	1	1	0	0	1	1	1	1	0	0	0	0	2	0	0	0	0
720	Bacteria	NA	NA	NA	NA	NA	ASV_ 3129	0	0	87	77	0	9	0	0	28	15	0	10	0	0	0.000277805	0.00029912	0	3.51521e-05	0	0	8.90127e-05	5.01672e-05	0	2.684e-05	6.48414e-05	0	0	1	1	0	0	0	0	0	0	0	0	2	0	0	0	0
721	Bacteria	Acidobacteriota	Acidobacteriae	Subgroup 2	NA	NA	ASV_ 313	0	0	63	55	0	0	0	0	0	0	0	0	0	0	0.000201169	0.000213657	0	0	0	0	0	0	0	0	3.45689e-05	0	0	1	1	0	0	0	0	0	0	0	0	2	0	0	0	0
722	Bacteria	Planctomycetota	Planctomycetes	Planctomycetales	Schlesneriaceae	Planctopirus	ASV_ 3145	62	53	0	0	8	0	0	0	0	0	81	89	0.000290497	0.000303336	0	0	3.13828e-05	0	0	0	0	0	0.000220217	0.000238876	9.03591e-05	1	1	0	0	0	0	0	0	0	0	1	1	2	0	0	0	0
723	Archaea	Crenarchaeota	Bathyarchaeia	NA	NA	NA	ASV_ 3146	0	0	41	31	0	0	0	0	0	0	0	0	0	0	0.00013092	0.000120425	0	0	0	0	0	0	0	0	2.09454e-05	0	0	1	1	0	0	0	0	0	0	0	0	2	0	0	0	0
724	Bacteria	Planctomycetota	OM190	NA	NA	NA	ASV_ 3155	167	119	0	0	0	0	0	0	0	0	0	0	0.000782469	0.000681074	0	0	0	0	0	0	0	0	0	0	0.000121962	1	1	0	0	0	0	0	0	0	0	0	0	2	0	0	0	0
725	Bacteria	Bacteroidota	Bacteroidia	Sphingobacteriales	GWF2-29-10	NA	ASV_ 316	0	0	293	363	16	26	0	0	31	39	0	0	0	0	0.000935597	0.00141014	6.27655e-05	0.000101551	0	0	9.85497e-05	0.000130435	0	0	0.000228253	0	0	1	1	0	1	0	0	0	1	0	0	2	0	0	0	0
726	Bacteria	Gemmatimonadota	Gemmatimonadetes	Gemmatimonadales	Gemmatimonadaceae	NA	ASV_ 3174	34	18	0	0	16	9	28	26	0	0	0	0	0.000159305	0.00010302	0	0	6.27655e-05	3.51521e-05	9.00026e-05	7.09644e-05	0	0	0	0	4.34341e-05	1	1	0	0	0	0	0	0	0	0	0	0	2	0	0	0	0
727	Bacteria	Proteobacteria	Gammaproteobacteria	Pseudomonadales	Pseudomonadaceae	Pseudomonas	ASV_ 3198	0	0	39	32	0	0	7	15	0	0	0	0	0	0	0.000124533	0.000124309	0	0	2.25007e-05	4.0941e-05	0	0	0	0	2.60237e-05	0	0	1	1	0	0	0	0	0	0	0	0	2	0	0	0	0
728	Bacteria	Nitrospirota	Thermodesulfovibrionia	Thermodesulfovibrionales	Thermodesulfovibrionaceae	Thermodesulfovibrio	ASV_ 322	81	107	18	19	0	0	412	838	101	77	1566	1323	0.000379521	0.000612394	5.7477e-05	7.38088e-05	0	0	0.00132432	0.00228724	0.000321081	0.000257525	0.00425753	0.00355093	0.00109349	1	1	0	0	0	0	1	1	1	1	1	1	2	0	0	0	0
729	Bacteria	Hydrogenedentes	Hydrogenedentia	Hydrogenedentiales	Hydrogenedensaceae	NA	ASV_ 3239	0	0	47	34	0	0	0	0	66	61	0	0	0	0	0.000150079	0.000132079	0	0	0	0	0.000209816	0.000204013	0	0	5.79989e-05	0	0	1	1	0	0	0	0	1	1	0	0	2	0	0	0	0
730	Bacteria	Myxococcota	Polyangia	Polyangiales	Sandaracinaceae	Sandaracinus	ASV_ 3240	36	35	0	0	124	59	0	0	0	0	0	0	0.000168676	0.000200316	0	0	0.000486433	0.000230442	0	0	0	0	0	0	9.04889e-05	1	1	0	0	1	1	0	0	0	0	0	0	2	0	0	0	0
731	Archaea	Crenarchaeota	Bathyarchaeia	NA	NA	NA	ASV_ 3266	0	0	71	50	0	0	0	0	0	0	0	0	0	0	0.000226715	0.000194234	0	0	0	0	0	0	0	0	3.5079e-05	0	0	1	1	0	0	0	0	0	0	0	0	2	0	0	0	0
732	Bacteria	Chloroflexi	Anaerolineae	SBR1031	NA	NA	ASV_ 3271	0	17	75	62	0	0	61	83	0	0	0	0	0	9.72963e-05	0.000239487	0.00024085	0	0	0.000196077	0.00022654	0	0	0	0	8.33542e-05	0	0	1	1	0	0	1	1	0	0	0	0	2	0	0	0	0
733	Archaea	Crenarchaeota	Bathyarchaeia	NA	NA	NA	ASV_ 3278	0	0	110	86	0	0	0	0	0	0	0	0	0	0	0.000351248	0.000334082	0	0	0	0	0	0	0	0	5.71108e-05	0	0	1	1	0	0	0	0	0	0	0	0	2	0	0	0	0
734	Bacteria	Planctomycetota	Planctomycetes	Pirellulales	Pirellulaceae	Thermogutta	ASV_ 3283	0	0	95	68	0	0	0	0	0	0	0	0	0	0	0.000303351	0.000264158	0	0	0	0	0	0	0	0	4.72924e-05	0	0	1	1	0	0	0	0	0	0	0	0	2	0	0	0	0
735	Bacteria	Verrucomicrobiota	Verrucomicrobiae	Pedosphaerales	Pedosphaeraceae	SH3-11	ASV_ 3300	119	135	0	0	0	0	0	0	0	0	0	0	0.000557568	0.000772647	0	0	0	0	0	0	0	0	0	0	0.000110851	1	1	0	0	0	0	0	0	0	0	0	0	2	0	0	0	0
736	Bacteria	Proteobacteria	Alphaproteobacteria	Rickettsiales	Rickettsiaceae	NA	ASV_ 3308	0	0	54	52	0	0	0	0	7	0	0	0	0	0	0.000172431	0.000202003	0	0	0	0	2.22532e-05	0	0	0	3.30572e-05	0	0	1	1	0	0	0	0	0	0	0	0	2	0	0	0	0
737	Bacteria	Proteobacteria	Gammaproteobacteria	Pseudomonadales	Porticoccaceae	C1-B045	ASV_ 3322	166	93	0	0	0	0	0	0	0	0	0	0	0.000777784	0.000532268	0	0	0	0	0	0	0	0	0	0	0.000109171	1	1	0	0	0	0	0	0	0	0	0	0	2	0	0	0	0
738	Archaea	Crenarchaeota	Bathyarchaeia	NA	NA	NA	ASV_ 3330	0	0	34	44	0	0	0	0	0	0	0	0	0	0	0.000108568	0.000170926	0	0	0	0	0	0	0	0	2.32911e-05	0	0	1	1	0	0	0	0	0	0	0	0	2	0	0	0	0
739	Bacteria	Planctomycetota	BD7-11	NA	NA	NA	ASV_ 3341	60	41	0	0	0	0	0	0	0	0	62	49	0.000281127	0.000234656	0	0	0	0	0	0	0	0	0.000168561	0.000131516	6.79883e-05	1	1	0	0	0	0	0	0	0	0	1	1	2	0	0	0	0
740	Bacteria	Sumerlaeota	Sumerlaeia	Sumerlaeales	Sumerlaeaceae	Sumerlaea	ASV_ 3343	207	94	0	0	0	0	0	0	0	0	0	0	0.000969887	0.000537991	0	0	0	0	0	0	0	0	0	0	0.000125657	1	1	0	0	0	0	0	0	0	0	0	0	2	0	0	0	0
741	Bacteria	Proteobacteria	Gammaproteobacteria	CCD24	NA	NA	ASV_ 3344	29	41	0	0	0	0	0	0	0	0	0	0	0.000135878	0.000234656	0	0	0	0	0	0	0	0	0	0	3.08778e-05	1	1	0	0	0	0	0	0	0	0	0	0	2	0	0	0	0
742	Bacteria	Chloroflexi	Dehalococcoidia	GIF9	AB-539-J10	SCGC-AB-539-J10	ASV_ 3352	0	0	85	63	0	0	0	0	0	0	0	0	0	0	0.000271419	0.000244734	0	0	0	0	0	0	0	0	4.30128e-05	0	0	1	1	0	0	0	0	0	0	0	0	2	0	0	0	0
743	Bacteria	Schekmanbacteria	NA	NA	NA	NA	ASV_ 3367	0	0	107	62	0	0	15	0	0	0	0	15	0	0	0.000341669	0.00024085	0	0	4.82157e-05	0	0	0	0	4.026e-05	5.59162e-05	0	0	1	1	0	0	0	0	0	0	0	0	2	0	0	0	0
744	Archaea	Nanoarchaeota	Nanoarchaeia	Woesearchaeales	NA	NA	ASV_ 3380	0	0	105	134	19	16	0	0	9	7	6	0	0	0	0.000335282	0.000520546	7.45341e-05	6.24927e-05	0	0	2.86112e-05	2.34114e-05	1.63124e-05	0	8.84325e-05	0	0	1	1	0	0	0	0	0	0	0	0	2	0	0	0	0
745	Bacteria	Chloroflexi	Anaerolineae	Anaerolineales	Anaerolineaceae	Anaerolinea	ASV_ 3390	0	0	145	134	0	0	0	0	0	0	0	0	0	0	0.000463009	0.000520546	0	0	0	0	0	0	0	0	8.19629e-05	0	0	1	1	0	0	0	0	0	0	0	0	2	0	0	0	0
746	Bacteria	Chloroflexi	Chloroflexia	Chloroflexales	Herpetosiphonaceae	Herpetosiphon	ASV_ 3397	178	99	0	0	0	0	0	0	0	0	0	0	0.000834009	0.000566608	0	0	0	0	0	0	0	0	0	0	0.000116718	1	1	0	0	0	0	0	0	0	0	0	0	2	0	0	0	0
747	Bacteria	Myxococcota	Polyangia	Haliangiales	Haliangiaceae	Haliangium	ASV_ 3420	50	64	0	0	0	0	62	0	0	0	0	0	0.000234272	0.000366292	0	0	0	0	0.000199292	0	0	0	0	0	6.66546e-05	1	1	0	0	0	0	1	0	0	0	0	0	2	0	0	0	0
748	Bacteria	Gemmatimonadota	Gemmatimonadetes	Gemmatimonadales	Gemmatimonadaceae	NA	ASV_ 3428	10	0	76	65	0	0	0	0	0	9	52	41	4.68544e-05	0	0.00024268	0.000252504	0	0	0	0	0	3.01003e-05	0.000141374	0.000110044	6.86297e-05	0	0	1	1	0	0	0	0	0	0	1	1	2	0	0	0	0
749	Bacteria	Chloroflexi	Anaerolineae	Caldilineales	Caldilineaceae	NA	ASV_ 344	190	82	13	13	245	55	122	124	266	184	359	287	0.000890234	0.000469312	4.15111e-05	5.05007e-05	0.000961097	0.000214819	0.000392154	0.000338445	0.00084562	0.000615385	0.000976024	0.000770308	0.000547118	1	1	0	0	1	1	1	1	1	1	1	1	2	0	0	0	0
750	Bacteria	DTB120	NA	NA	NA	NA	ASV_ 346	25	35	0	0	0	0	711	1306	31	27	1422	1435	0.000117136	0.000200316	0	0	0	0	0.00228542	0.0035646	9.85497e-05	9.0301e-05	0.00386603	0.00385154	0.00117282	1	1	0	0	0	0	1	1	0	0	1	1	2	0	0	0	0
751	Archaea	Crenarchaeota	Bathyarchaeia	NA	NA	NA	ASV_ 347	0	0	72	56	0	0	0	0	0	0	0	0	0	0	0.000229908	0.000217542	0	0	0	0	0	0	0	0	3.72875e-05	0	0	1	1	0	0	0	0	0	0	0	0	2	0	0	0	0
752	Archaea	Halobacterota	Methanomicrobia	Methanomicrobiales	Methanomicrobiaceae	NA	ASV_ 3470	0	0	42	28	0	0	0	0	0	0	0	0	0	0	0.000134113	0.000108771	0	0	0	0	0	0	0	0	2.02403e-05	0	0	1	1	0	0	0	0	0	0	0	0	2	0	0	0	0
753	Bacteria	Patescibacteria	Microgenomatia	Candidatus Woesebacteria	NA	NA	ASV_ 3476	0	3	89	60	0	0	0	0	39	49	0	0	0	1.71699e-05	0.000284192	0.00023308	0	0	0	0	0.000123982	0.00016388	0	0	6.85253e-05	0	0	1	1	0	0	0	0	1	1	0	0	2	0	0	0	0
754	Bacteria	Chloroflexi	Anaerolineae	Anaerolineales	Anaerolineaceae	RBG-16-58-14	ASV_ 348	0	0	148	113	0	0	23	25	86	116	58	54	0	0	0.000472588	0.000438968	0	0	7.39307e-05	6.8235e-05	0.000273396	0.00038796	0.000157686	0.000144936	0.000168142	0	0	1	1	0	0	0	0	1	1	1	1	2	0	0	0	0
755	Bacteria	Chloroflexi	Anaerolineae	SBR1031	NA	NA	ASV_ 3486	31	28	0	0	0	0	0	0	0	0	0	0	0.000145249	0.000160253	0	0	0	0	0	0	0	0	0	0	2.54585e-05	1	1	0	0	0	0	0	0	0	0	0	0	2	0	0	0	0
756	Bacteria	Desulfobacterota	Syntrophobacteria	Syntrophobacterales	Syntrophobacteraceae	Desulfosoma	ASV_ 350	0	0	727	640	0	0	14	22	323	380	0	0	0	0	0.00232143	0.00248619	0	0	4.50013e-05	6.00468e-05	0.00102682	0.0012709	0	0	0.000600866	0	0	1	1	0	0	0	0	1	1	0	0	2	0	0	0	0
757	Archaea	Crenarchaeota	Bathyarchaeia	NA	NA	NA	ASV_ 3503	0	0	42	30	0	0	0	0	0	0	0	0	0	0	0.000134113	0.00011654	0	0	0	0	0	0	0	0	2.08878e-05	0	0	1	1	0	0	0	0	0	0	0	0	2	0	0	0	0
758	Bacteria	Proteobacteria	Alphaproteobacteria	Rhodospirillales	Magnetospirillaceae	Magnetospirillum	ASV_ 3517	24	19	0	0	0	0	0	0	0	0	19	13	0.000112451	0.000108743	0	0	0	0	0	0	0	0	5.16558e-05	3.4892e-05	2.56451e-05	1	1	0	0	0	0	0	0	0	0	0	0	2	0	0	0	0
759	Bacteria	Proteobacteria	Gammaproteobacteria	EPR3968-O8a-Bc78	NA	NA	ASV_ 3526	0	0	106	82	0	21	0	0	0	0	0	0	0	0	0.000338475	0.000318543	0	8.20216e-05	0	0	0	0	0	0	6.15867e-05	0	0	1	1	0	0	0	0	0	0	0	0	2	0	0	0	0
760	Bacteria	Proteobacteria	Alphaproteobacteria	Caulobacterales	Parvularculaceae	Amphiplicatus	ASV_ 357	55	26	0	0	54	41	161	100	235	162	574	568	0.000257699	0.000148806	0	0	0.000211834	0.000160137	0.000517515	0.00027294	0.000747071	0.000541806	0.00156055	0.00152451	0.000495239	1	1	0	0	1	1	1	1	1	1	1	1	2	0	0	0	0
761	Bacteria	Proteobacteria	Alphaproteobacteria	Sphingomonadales	Sphingomonadaceae	Altererythrobacter	ASV_ 3583	131	79	0	0	0	0	0	0	0	0	0	0	0.000613793	0.000452142	0	0	0	0	0	0	0	0	0	0	8.88279e-05	1	1	0	0	0	0	0	0	0	0	0	0	2	0	0	0	0
762	Archaea	Crenarchaeota	Bathyarchaeia	NA	NA	NA	ASV_ 3593	0	0	32	38	0	0	0	0	0	0	0	0	0	0	0.000102181	0.000147618	0	0	0	0	0	0	0	0	2.08166e-05	0	0	1	1	0	0	0	0	0	0	0	0	2	0	0	0	0
763	Bacteria	Proteobacteria	Alphaproteobacteria	Caulobacterales	Hyphomonadaceae	SWB02	ASV_ 3602	28	27	0	0	0	0	9	0	0	0	58	49	0.000131192	0.000154529	0	0	0	0	2.89294e-05	0	0	0	0.000157686	0.000131516	5.03211e-05	1	1	0	0	0	0	0	0	0	0	1	1	2	0	0	0	0
764	Archaea	Crenarchaeota	Bathyarchaeia	NA	NA	NA	ASV_ 3643	0	0	103	100	0	0	0	0	0	0	0	0	0	0	0.000328896	0.000388467	0	0	0	0	0	0	0	0	5.97803e-05	0	0	1	1	0	0	0	0	0	0	0	0	2	0	0	0	0
765	Bacteria	Desulfobacterota	Desulfobaccia	Desulfobaccales	Desulfobaccaceae	Desulfobacca	ASV_ 365	0	0	140	60	325	228	311	438	309	450	185	218	0	0	0.000447043	0.00023308	0.00127492	0.000890521	0.000999672	0.00119548	0.000982318	0.00150502	0.000502965	0.000585112	0.000718011	0	0	1	1	1	1	1	1	1	1	1	1	2	0	0	0	0
766	Bacteria	Chloroflexi	Dehalococcoidia	GIF9	NA	NA	ASV_ 3655	0	0	103	104	0	0	0	0	0	0	0	0	0	0	0.000328896	0.000404006	0	0	0	0	0	0	0	0	6.10751e-05	0	0	1	1	0	0	0	0	0	0	0	0	2	0	0	0	0
767	Bacteria	Proteobacteria	Alphaproteobacteria	Rhodospirillales	NA	NA	ASV_ 3692	133	126	0	0	0	0	0	0	0	0	0	0	0.000623164	0.000721137	0	0	0	0	0	0	0	0	0	0	0.000112025	1	1	0	0	0	0	0	0	0	0	0	0	2	0	0	0	0
768	Bacteria	Hydrothermae	NA	NA	NA	NA	ASV_ 3711	0	0	55	30	10	19	23	27	0	25	0	0	0	0	0.000175624	0.00011654	3.92285e-05	7.42101e-05	7.39307e-05	7.36938e-05	0	8.3612e-05	0	0	5.30699e-05	0	0	1	1	0	0	0	0	0	0	0	0	2	0	0	0	0
769	Bacteria	Desulfobacterota	Desulfobaccia	Desulfobaccales	Desulfobaccaceae	Desulfobacca	ASV_ 3722	0	0	109	109	0	0	20	17	0	0	0	0	0	0	0.000348055	0.000423429	0	0	6.42876e-05	4.63998e-05	0	0	0	0	7.35143e-05	0	0	1	1	0	0	0	0	0	0	0	0	2	0	0	0	0
770	Archaea	Crenarchaeota	Bathyarchaeia	NA	NA	NA	ASV_ 3729	0	0	57	63	0	0	0	40	0	0	0	0	0	0	0.00018201	0.000244734	0	0	0	0.000109176	0	0	0	0	4.46601e-05	0	0	1	1	0	0	0	1	0	0	0	0	2	0	0	0	0
771	Archaea	Crenarchaeota	Bathyarchaeia	NA	NA	NA	ASV_ 3730	0	0	43	56	0	0	0	0	0	0	0	0	0	0	0.000137306	0.000217542	0	0	0	0	0	0	0	0	2.95706e-05	0	0	1	1	0	0	0	0	0	0	0	0	2	0	0	0	0
772	Bacteria	Proteobacteria	Gammaproteobacteria	Burkholderiales	NA	NA	ASV_ 3745	0	0	33	39	0	131	0	0	0	0	0	0	0	0	0.000105374	0.000151502	0	0.000511659	0	0	0	0	0	0	6.40446e-05	0	0	1	1	0	1	0	0	0	0	0	0	2	0	0	0	0
773	Bacteria	Proteobacteria	Alphaproteobacteria	Rhizobiales	Xanthobacteraceae	Pseudolabrys	ASV_ 3757	24	22	0	0	0	0	56	29	0	0	0	0	0.000112451	0.000125913	0	0	0	0	0.000180005	7.91526e-05	0	0	0	0	4.14601e-05	1	1	0	0	0	0	1	0	0	0	0	0	2	0	0	0	0
774	Bacteria	Planctomycetota	OM190	NA	NA	NA	ASV_ 3758	47	114	0	0	0	0	0	0	0	0	0	0	0.000220216	0.000652458	0	0	0	0	0	0	0	0	0	0	7.27228e-05	1	1	0	0	0	0	0	0	0	0	0	0	2	0	0	0	0
775	Bacteria	Verrucomicrobiota	Verrucomicrobiae	Pedosphaerales	Pedosphaeraceae	Limisphaera	ASV_ 3767	0	0	78	107	0	0	0	0	0	0	0	0	0	0	0.000249067	0.00041566	0	0	0	0	0	0	0	0	5.53939e-05	0	0	1	1	0	0	0	0	0	0	0	0	2	0	0	0	0
776	Bacteria	Proteobacteria	Gammaproteobacteria	Burkholderiales	Nitrosomonadaceae	oc32	ASV_ 377	113	103	0	0	0	0	1749	2392	37	27	56	58	0.000529455	0.000589501	0	0	0	0	0.00562195	0.00652872	0.000117624	9.0301e-05	0.000152249	0.000155672	0.00114879	1	1	0	0	0	0	1	1	1	0	1	1	2	0	0	0	0
777	Bacteria	MBNT15	NA	NA	NA	NA	ASV_ 379	16	0	1021	606	0	0	163	168	1018	186	236	200	7.49671e-05	0	0.00326022	0.00235411	0	0	0.000523944	0.000458539	0.00323625	0.000622074	0.00064162	0.0005368	0.00097571	0	0	1	1	0	0	1	1	1	1	1	1	2	0	0	0	0
778	Bacteria	Cyanobacteria	Cyanobacteria	Oxyphotobacteria Incertae Sedis	Unknown Family	Pseudanabaena NgrPSln22	ASV_ 3902	142	50	0	0	0	0	0	0	0	0	0	0	0.000665333	0.000286166	0	0	0	0	0	0	0	0	0	0	7.92915e-05	1	1	0	0	0	0	0	0	0	0	0	0	2	0	0	0	0
779	Bacteria	Hydrogenedentes	Hydrogenedentia	Hydrogenedentiales	Hydrogenedensaceae	NA	ASV_ 3944	27	25	0	0	0	0	0	0	0	0	22	0	0.000126507	0.000143083	0	0	0	0	0	0	0	0	5.9812e-05	0	2.74501e-05	1	1	0	0	0	0	0	0	0	0	0	0	2	0	0	0	0
780	Bacteria	NA	NA	NA	NA	NA	ASV_ 3945	0	0	41	47	0	0	0	0	0	0	0	0	0	0	0.00013092	0.00018258	0	0	0	0	0	0	0	0	2.61249e-05	0	0	1	1	0	0	0	0	0	0	0	0	2	0	0	0	0
781	Bacteria	Verrucomicrobiota	Kiritimatiellae	WCHB1-41	NA	NA	ASV_ 395	0	0	161	121	340	295	0	0	67	120	209	181	0	0	0.000514099	0.000470045	0.00133377	0.00115221	0	0	0.000212995	0.000401338	0.000568214	0.000485804	0.000428206	0	0	1	1	1	1	0	0	1	1	1	1	2	0	0	0	0
782	Bacteria	Firmicutes	Clostridia	Clostridiales	Caloramatoraceae	Caloramator	ASV_ 397	10	0	566	324	118	18	451	297	367	440	195	124	4.68544e-05	0	0.00180733	0.00125863	0.000462896	7.03043e-05	0.00144969	0.000810632	0.0011667	0.00147157	0.000530152	0.000332816	0.000783965	0	0	1	1	1	0	1	1	1	1	1	1	2	0	0	0	0
783	Archaea	Crenarchaeota	Bathyarchaeia	NA	NA	NA	ASV_ 399	76	54	0	0	0	0	208	257	382	427	244	302	0.000356094	0.000309059	0	0	0	0	0.000668591	0.000701456	0.00121439	0.00142809	0.00066337	0.000810569	0.000512635	1	1	0	0	0	0	1	1	1	1	1	1	2	0	0	0	0
784	Bacteria	Proteobacteria	Gammaproteobacteria	Burkholderiales	Sutterellaceae	NA	ASV_ 402	227	151	23	22	0	0	315	467	301	392	344	328	0.0010636	0.00086422	7.34428e-05	8.54628e-05	0	0	0.00101253	0.00127463	0.000956886	0.00131104	0.000935243	0.000880353	0.000704783	1	1	0	0	0	0	1	1	1	1	1	1	2	0	0	0	0
785	Bacteria	Nitrospinota	Nitrospinia	Nitrospinales	Nitrospinaceae	Nitrospina	ASV_ 4032	112	114	0	0	0	0	0	0	0	0	0	0	0.00052477	0.000652458	0	0	0	0	0	0	0	0	0	0	9.81023e-05	1	1	0	0	0	0	0	0	0	0	0	0	2	0	0	0	0
786	Bacteria	Desulfobacterota	NA	NA	NA	NA	ASV_ 4050	0	0	39	30	0	0	0	0	0	0	0	0	0	0	0.000124533	0.00011654	0	0	0	0	0	0	0	0	2.00895e-05	0	0	1	1	0	0	0	0	0	0	0	0	2	0	0	0	0
787	Bacteria	Proteobacteria	Gammaproteobacteria	NA	NA	NA	ASV_ 406	0	0	242	227	0	0	19	43	0	0	776	680	0	0	0.000772746	0.000881821	0	0	6.10732e-05	0.000117364	0	0	0.00210973	0.00182512	0.000480655	0	0	1	1	0	0	0	1	0	0	1	1	2	0	0	0	0
788	Bacteria	Desulfobacterota	Syntrophorhabdia	Syntrophorhabdales	Syntrophorhabdaceae	Syntrophorhabdus	ASV_ 4060	0	0	106	68	9	0	0	0	0	0	0	0	0	0	0.000338475	0.000264158	3.53056e-05	0	0	0	0	0	0	0	5.31616e-05	0	0	1	1	0	0	0	0	0	0	0	0	2	0	0	0	0
789	Bacteria	Actinobacteriota	Thermoleophilia	Gaiellales	NA	NA	ASV_ 4070	23	0	25	26	32	0	0	6	0	18	22	0	0.000107765	0	7.98291e-05	0.000101001	0.000125531	0	0	1.63764e-05	0	6.02007e-05	5.9812e-05	0	4.58763e-05	1	0	0	1	1	0	0	0	0	0	0	0	2	0	0	0	0
790	Bacteria	Elusimicrobiota	Elusimicrobia	Lineage IV	NA	NA	ASV_ 4096	35	36	0	0	0	0	0	0	0	0	50	52	0.00016399	0.000206039	0	0	0	0	0	0	0	0	0.000135936	0.000139568	5.37945e-05	1	1	0	0	0	0	0	0	0	0	1	1	2	0	0	0	0
791	Archaea	Nanoarchaeota	Nanoarchaeia	Woesearchaeales	GW2011_GWC1_47_15	NA	ASV_ 4108	7	0	104	94	10	4	0	0	0	0	0	0	3.27981e-05	0	0.000332089	0.000365159	3.92285e-05	1.56232e-05	0	0	0	0	0	0	6.54082e-05	0	0	1	1	0	0	0	0	0	0	0	0	2	0	0	0	0
792	Bacteria	Firmicutes	Clostridia	Clostridiales	Caloramatoraceae	Caloramator	ASV_ 4124	14	0	85	51	55	0	0	0	0	0	13	0	6.55962e-05	0	0.000271419	0.000198118	0.000215757	0	0	0	0	0	3.53435e-05	0	6.55194e-05	0	0	1	1	1	0	0	0	0	0	0	0	2	0	0	0	0
793	Archaea	Aenigmarchaeota	Aenigmarchaeia	Aenigmarchaeales	NA	NA	ASV_ 4148	102	112	0	0	0	0	0	0	0	0	0	0	0.000477915	0.000641011	0	0	0	0	0	0	0	0	0	0	9.32438e-05	1	1	0	0	0	0	0	0	0	0	0	0	2	0	0	0	0
794	Bacteria	Proteobacteria	Gammaproteobacteria	Pseudomonadales	KI89A clade	NA	ASV_ 4152	64	41	0	0	0	0	0	0	0	0	0	0	0.000299868	0.000234656	0	0	0	0	0	0	0	0	0	0	4.45437e-05	1	1	0	0	0	0	0	0	0	0	0	0	2	0	0	0	0
795	Bacteria	Chloroflexi	Anaerolineae	SBR1031	A4b	NA	ASV_ 4188	44	35	0	0	0	0	0	0	0	0	64	46	0.000206159	0.000200316	0	0	0	0	0	0	0	0	0.000173999	0.000123464	5.86615e-05	1	1	0	0	0	0	0	0	0	0	1	1	2	0	0	0	0
796	Bacteria	Proteobacteria	Gammaproteobacteria	Steroidobacterales	Steroidobacteraceae	NA	ASV_ 420	0	0	45	34	0	0	0	0	0	0	0	0	0	0	0.000143692	0.000132079	0	0	0	0	0	0	0	0	2.29809e-05	0	0	1	1	0	0	0	0	0	0	0	0	2	0	0	0	0
797	Bacteria	Proteobacteria	Gammaproteobacteria	MBMPE27	NA	NA	ASV_ 4215	0	0	48	58	0	0	0	0	0	0	48	21	0	0	0.000153272	0.000225311	0	0	0	0	0	0	0.000130499	5.6364e-05	4.71205e-05	0	0	1	1	0	0	0	0	0	0	1	0	2	0	0	0	0
798	Bacteria	Spirochaetota	Leptospirae	Leptospirales	Leptospiraceae	NA	ASV_ 4238	0	0	47	39	0	0	0	0	0	0	0	0	0	0	0.000150079	0.000151502	0	0	0	0	0	0	0	0	2.51317e-05	0	0	1	1	0	0	0	0	0	0	0	0	2	0	0	0	0
799	Bacteria	Firmicutes	Clostridia	Clostridiales	Caloramatoraceae	Caloramator	ASV_ 4239	0	0	93	79	5	0	18	13	0	0	0	0	0	0	0.000296964	0.000306889	1.96142e-05	0	5.78588e-05	3.54822e-05	0	0	0	0	5.9734e-05	0	0	1	1	0	0	0	0	0	0	0	0	2	0	0	0	0
800	Bacteria	NA	NA	NA	NA	NA	ASV_ 424	0	7	195	216	18	27	73	56	530	321	0	0	0	4.00632e-05	0.000622667	0.000839089	7.06112e-05	0.000105456	0.00023465	0.000152846	0.00168488	0.00107358	0	0	0.000401987	0	0	1	1	0	1	1	1	1	1	0	0	2	0	0	0	0
801	Bacteria	Proteobacteria	Alphaproteobacteria	Caulobacterales	Parvularculaceae	Amphiplicatus	ASV_ 425	88	55	11	0	401	491	0	0	0	0	457	490	0.000412319	0.000314782	3.51248e-05	0	0.00157306	0.00191774	0	0	0	0	0.00124246	0.00131516	0.000567554	1	1	0	0	1	1	0	0	0	0	1	1	2	0	0	0	0
802	Bacteria	Chloroflexi	Dehalococcoidia	MSBL5	NA	NA	ASV_ 4258	27	33	0	0	0	0	26	31	0	39	34	12	0.000126507	0.000188869	0	0	0	0	8.35739e-05	8.46114e-05	0	0.000130435	9.24368e-05	3.2208e-05	6.15534e-05	1	1	0	0	0	0	0	0	0	1	0	0	2	0	0	0	0
803	Bacteria	Proteobacteria	Gammaproteobacteria	Pseudomonadales	NA	NA	ASV_ 4274	95	63	0	0	0	0	0	0	0	0	0	0	0.000445117	0.000360569	0	0	0	0	0	0	0	0	0	0	6.71405e-05	1	1	0	0	0	0	0	0	0	0	0	0	2	0	0	0	0
804	Bacteria	NA	NA	NA	NA	NA	ASV_ 4278	0	0	52	65	0	12	0	0	0	0	0	0	0	0	0.000166045	0.000252504	0	4.68695e-05	0	0	0	0	0	0	3.87848e-05	0	0	1	1	0	0	0	0	0	0	0	0	2	0	0	0	0
805	Bacteria	Patescibacteria	ABY1	Candidatus Uhrbacteria	NA	NA	ASV_ 4287	90	54	0	4	0	0	0	0	0	0	28	24	0.00042169	0.000309059	0	1.55387e-05	0	0	0	0	0	0	7.61244e-05	6.4416e-05	7.39023e-05	1	1	0	0	0	0	0	0	0	0	0	0	2	0	0	0	0
806	Bacteria	Desulfobacterota	Desulfobacteria	Desulfatiglandales	Desulfatiglandaceae	Desulfatiglans	ASV_ 429	0	0	102	56	0	8	21	0	413	441	478	743	0	0	0.000325703	0.000217542	0	3.12463e-05	6.7502e-05	0	0.00131294	0.00147492	0.00129955	0.00199421	0.000560301	0	0	1	1	0	0	0	0	1	1	1	1	2	0	0	0	0
807	Bacteria	Proteobacteria	Gammaproteobacteria	Methylococcales	Methylohalobiaceae	Methylohalobius	ASV_ 4290	23	0	55	0	0	0	0	0	0	0	0	0	0.000107765	0	0.000175624	0	0	0	0	0	0	0	0	0	2.36158e-05	1	0	1	0	0	0	0	0	0	0	0	0	2	0	0	0	0
808	Bacteria	Chloroflexi	Anaerolineae	NA	NA	NA	ASV_ 4302	0	0	91	70	0	0	0	0	0	0	0	0	0	0	0.000290578	0.000271927	0	0	0	0	0	0	0	0	4.68754e-05	0	0	1	1	0	0	0	0	0	0	0	0	2	0	0	0	0
809	Bacteria	Proteobacteria	Alphaproteobacteria	Rhodobacterales	Rhodobacteraceae	Limibaculum	ASV_ 433	54	27	0	15	628	273	0	0	0	0	111	79	0.000253014	0.000154529	0	5.82701e-05	0.00246355	0.00106628	0	0	0	0	0.000301779	0.000212036	0.000375788	1	1	0	0	1	1	0	0	0	0	1	1	2	0	0	0	0
810	Bacteria	Proteobacteria	Gammaproteobacteria	Pseudomonadales	Moraxellaceae	Permianibacter	ASV_ 4351	23	19	0	0	0	0	0	0	0	0	0	0	0.000107765	0.000108743	0	0	0	0	0	0	0	0	0	0	1.80423e-05	1	1	0	0	0	0	0	0	0	0	0	0	2	0	0	0	0
811	Archaea	Crenarchaeota	Bathyarchaeia	NA	NA	NA	ASV_ 4353	0	0	33	35	0	0	0	0	0	0	0	0	0	0	0.000105374	0.000135964	0	0	0	0	0	0	0	0	2.01115e-05	0	0	1	1	0	0	0	0	0	0	0	0	2	0	0	0	0
812	Bacteria	Bacteroidota	Bacteroidia	NA	NA	NA	ASV_ 4368	67	107	0	0	0	21	0	0	0	0	0	0	0.000313925	0.000612394	0	0	0	8.20216e-05	0	0	0	0	0	0	8.40284e-05	1	1	0	0	0	0	0	0	0	0	0	0	2	0	0	0	0
813	Archaea	Crenarchaeota	Bathyarchaeia	NA	NA	NA	ASV_ 4370	0	0	32	59	0	0	0	0	0	0	0	0	0	0	0.000102181	0.000229196	0	0	0	0	0	0	0	0	2.76147e-05	0	0	1	1	0	0	0	0	0	0	0	0	2	0	0	0	0
814	Bacteria	Spirochaetota	Leptospirae	Leptospirales	Leptospiraceae	NA	ASV_ 4387	68	89	0	0	0	0	0	0	0	0	0	0	0.00031861	0.000509375	0	0	0	0	0	0	0	0	0	0	6.89987e-05	1	1	0	0	0	0	0	0	0	0	0	0	2	0	0	0	0
815	Archaea	Crenarchaeota	Bathyarchaeia	NA	NA	NA	ASV_ 4389	0	0	81	71	0	0	0	0	0	0	0	0	0	0	0.000258646	0.000275812	0	0	0	0	0	0	0	0	4.45382e-05	0	0	1	1	0	0	0	0	0	0	0	0	2	0	0	0	0
816	Bacteria	Desulfobacterota	Desulfobaccia	Desulfobaccales	Desulfobaccaceae	Desulfobacca	ASV_ 439	0	0	159	104	0	0	946	989	415	415	342	309	0	0	0.000507713	0.000404006	0	0	0.0030408	0.00269938	0.00131929	0.00138796	0.000929805	0.000829357	0.000926526	0	0	1	1	0	0	1	1	1	1	1	1	2	0	0	0	0
817	Bacteria	Bacteroidota	Chlorobia	Chlorobiales	Chloroherpetonaceae	GBChlB	ASV_ 44	0	0	45	44	0	0	0	0	649	432	0	0	0	0	0.000143692	0.000170926	0	0	0	0	0.00206319	0.00144482	0	0	0.000318552	0	0	1	1	0	0	0	0	1	1	0	0	2	0	0	0	0
818	Archaea	Crenarchaeota	Nitrososphaeria	Marine Benthic Group A	NA	NA	ASV_ 4424	0	0	42	29	0	0	0	0	0	0	0	0	0	0	0.000134113	0.000112655	0	0	0	0	0	0	0	0	2.0564e-05	0	0	1	1	0	0	0	0	0	0	0	0	2	0	0	0	0
819	Archaea	Crenarchaeota	Bathyarchaeia	NA	NA	NA	ASV_ 4426	0	0	45	43	0	0	0	0	0	0	0	0	0	0	0.000143692	0.000167041	0	0	0	0	0	0	0	0	2.58944e-05	0	0	1	1	0	0	0	0	0	0	0	0	2	0	0	0	0
820	Bacteria	Deferribacterota	Deferribacteres	Deferribacterales	Deferribacteraceae	NA	ASV_ 444	0	0	75	100	865	901	0	0	114	107	22	26	0	0	0.000239487	0.000388467	0.00339326	0.00351912	0	0	0.000362409	0.00035786	5.9812e-05	6.9784e-05	0.000699183	0	0	1	1	1	1	0	0	1	1	0	0	2	0	0	0	0
821	Bacteria	NA	NA	NA	NA	NA	ASV_ 4457	0	0	68	80	0	27	0	0	0	0	0	0	0	0	0.000217135	0.000310774	0	0.000105456	0	0	0	0	0	0	5.27804e-05	0	0	1	1	0	1	0	0	0	0	0	0	2	0	0	0	0
822	Bacteria	Bacteroidota	Kapabacteria	Kapabacteriales	NA	NA	ASV_ 4469	39	21	0	0	0	0	0	0	0	0	0	0	0.000182732	0.00012019	0	0	0	0	0	0	0	0	0	0	2.52435e-05	1	1	0	0	0	0	0	0	0	0	0	0	2	0	0	0	0
823	Archaea	Crenarchaeota	Bathyarchaeia	NA	NA	NA	ASV_ 4482	0	0	105	85	0	0	0	0	0	0	0	0	0	0	0.000335282	0.000330197	0	0	0	0	0	0	0	0	5.54566e-05	0	0	1	1	0	0	0	0	0	0	0	0	2	0	0	0	0
824	Bacteria	Myxococcota	Polyangia	Blfdi19	NA	NA	ASV_ 4483	0	0	89	67	0	0	0	0	0	7	0	0	0	0	0.000284192	0.000260273	0	0	0	0	0	2.34114e-05	0	0	4.7323e-05	0	0	1	1	0	0	0	0	0	0	0	0	2	0	0	0	0
825	Bacteria	NA	NA	NA	NA	NA	ASV_ 4498	0	0	76	79	0	0	0	0	0	0	0	0	0	0	0.00024268	0.000306889	0	0	0	0	0	0	0	0	4.57975e-05	0	0	1	1	0	0	0	0	0	0	0	0	2	0	0	0	0
826	Archaea	Iainarchaeota	Iainarchaeia	Iainarchaeales	Candidatus Iainarchaeum	NA	ASV_ 4525	0	0	68	79	0	0	0	0	5	0	0	0	0	0	0.000217135	0.000306889	0	0	0	0	1.58951e-05	0	0	0	4.49933e-05	0	0	1	1	0	0	0	0	0	0	0	0	2	0	0	0	0
827	Bacteria	MBNT15	NA	NA	NA	NA	ASV_ 4526	3	0	37	33	0	0	0	0	21	28	8	12	1.40563e-05	0	0.000118147	0.000128194	0	0	0	0	6.67595e-05	9.36455e-05	2.17498e-05	3.2208e-05	3.95634e-05	0	0	1	1	0	0	0	0	0	0	0	0	2	0	0	0	0
828	Bacteria	Planctomycetota	Planctomycetes	Pirellulales	Pirellulaceae	Thermogutta	ASV_ 4527	0	0	67	59	0	0	0	0	61	0	0	0	0	0	0.000213942	0.000229196	0	0	0	0	0.00019392	0	0	0	5.30882e-05	0	0	1	1	0	0	0	0	1	0	0	0	2	0	0	0	0
829	Bacteria	Planctomycetota	Planctomycetes	Pirellulales	Pirellulaceae	Thermogutta	ASV_ 4559	0	0	109	76	0	0	0	0	0	0	0	0	0	0	0.000348055	0.000295235	0	0	0	0	0	0	0	0	5.36075e-05	0	0	1	1	0	0	0	0	0	0	0	0	2	0	0	0	0
830	Bacteria	Verrucomicrobiota	Chlamydiae	LD1-PA32	NA	NA	ASV_ 458	110	32	0	0	51	15	627	896	324	328	305	237	0.000515399	0.000183146	0	0	0.000200065	5.85869e-05	0.00201542	0.00244554	0.00103	0.00109699	0.000829212	0.000636108	0.000750872	1	1	0	0	1	0	1	1	1	1	1	1	2	0	0	0	0
831	Bacteria	Myxococcota	Polyangia	Haliangiales	Haliangiaceae	Haliangium	ASV_ 4583	118	66	0	0	0	0	0	0	0	0	0	0	0.000552882	0.000377739	0	0	0	0	0	0	0	0	0	0	7.75517e-05	1	1	0	0	0	0	0	0	0	0	0	0	2	0	0	0	0
832	Bacteria	Patescibacteria	Parcubacteria	Candidatus Jorgensenbacteria	NA	NA	ASV_ 4596	0	0	62	82	5	30	0	0	0	0	0	0	0	0	0.000197976	0.000318543	1.96142e-05	0.000117174	0	0	0	0	0	0	5.44423e-05	0	0	1	1	0	1	0	0	0	0	0	0	2	0	0	0	0
833	Bacteria	Firmicutes	NA	NA	NA	NA	ASV_ 4598	0	0	106	77	0	0	0	0	0	0	0	0	0	0	0.000338475	0.00029912	0	0	0	0	0	0	0	0	5.31329e-05	0	0	1	1	0	0	0	0	0	0	0	0	2	0	0	0	0
834	Archaea	Crenarchaeota	Bathyarchaeia	NA	NA	NA	ASV_ 464	0	0	93	55	0	0	0	0	0	0	0	0	0	0	0.000296964	0.000213657	0	0	0	0	0	0	0	0	4.25518e-05	0	0	1	1	0	0	0	0	0	0	0	0	2	0	0	0	0
835	Bacteria	Nitrospirota	Nitrospiria	Nitrospirales	Nitrospiraceae	Nitrospira	ASV_ 4663	89	85	0	0	0	0	0	0	0	0	0	0	0.000417004	0.000486482	0	0	0	0	0	0	0	0	0	0	7.52905e-05	1	1	0	0	0	0	0	0	0	0	0	0	2	0	0	0	0
836	Bacteria	Proteobacteria	Alphaproteobacteria	Reyranellales	Reyranellaceae	NA	ASV_ 4664	40	20	0	0	0	0	0	0	0	0	0	0	0.000187418	0.000114466	0	0	0	0	0	0	0	0	0	0	2.5157e-05	1	1	0	0	0	0	0	0	0	0	0	0	2	0	0	0	0
837	Bacteria	Nitrospirota	Thermodesulfovibrionia	NA	NA	NA	ASV_ 467	52	57	0	0	0	0	1010	1646	51	56	318	374	0.000243643	0.000326229	0	0	0	0	0.00324652	0.00449259	0.00016213	0.000187291	0.000864556	0.00100382	0.000877232	1	1	0	0	0	0	1	1	1	1	1	1	2	0	0	0	0
838	Bacteria	Proteobacteria	Alphaproteobacteria	Rhodospirillales	Magnetospirillaceae	NA	ASV_ 4676	70	73	0	0	0	0	0	0	0	0	35	0	0.000327981	0.000417802	0	0	0	0	0	0	0	0	9.51555e-05	0	7.00782e-05	1	1	0	0	0	0	0	0	0	0	0	0	2	0	0	0	0
839	Bacteria	Myxococcota	Polyangia	Polyangiales	Sandaracinaceae	NA	ASV_ 4687	71	40	0	0	0	0	0	0	0	0	0	0	0.000332666	0.000228932	0	0	0	0	0	0	0	0	0	0	4.67999e-05	1	1	0	0	0	0	0	0	0	0	0	0	2	0	0	0	0
840	Bacteria	NA	NA	NA	NA	NA	ASV_ 4689	0	0	71	48	0	0	0	0	33	0	0	14	0	0	0.000226715	0.000186464	0	0	0	0	0.000104908	0	0	3.7576e-05	4.63052e-05	0	0	1	1	0	0	0	0	1	0	0	0	2	0	0	0	0
841	Bacteria	Chloroflexi	Chloroflexia	Chloroflexales	Chloroflexaceae	Chloronema	ASV_ 47	91	64	14	14	2687	1062	0	0	0	9	1441	1263	0.000426375	0.000366292	4.47043e-05	5.43854e-05	0.0105407	0.00414795	0	0	0	3.01003e-05	0.00391769	0.00338989	0.00190984	1	1	0	0	1	1	0	0	0	0	1	1	2	0	0	0	0
842	Bacteria	Planctomycetota	Brocadiae	Brocadiales	Brocadiaceae	Candidatus Brocadia	ASV_ 470	78	80	0	0	0	0	1001	1254	0	0	431	720	0.000365465	0.000457865	0	0	0	0	0.00321759	0.00342267	0	0	0.00117177	0.00193248	0.000880654	1	1	0	0	0	0	1	1	0	0	1	1	2	0	0	0	0
843	Bacteria	Chloroflexi	Anaerolineae	SBR1031	A4b	NA	ASV_ 4708	30	35	0	0	0	0	0	0	0	0	0	0	0.000140563	0.000200316	0	0	0	0	0	0	0	0	0	0	2.84066e-05	1	1	0	0	0	0	0	0	0	0	0	0	2	0	0	0	0
844	Bacteria	Myxococcota	Myxococcia	Myxococcales	Myxococcaceae	P3OB-42	ASV_ 4712	103	73	0	0	0	0	0	0	0	0	0	0	0.000482601	0.000417802	0	0	0	0	0	0	0	0	0	0	7.50335e-05	1	1	0	0	0	0	0	0	0	0	0	0	2	0	0	0	0
845	Bacteria	NA	NA	NA	NA	NA	ASV_ 473	236	232	0	0	0	0	306	605	0	0	199	259	0.00110576	0.00132781	0	0	0	0	0.0009836	0.00165129	0	0	0.000541027	0.000695156	0.000525387	1	1	0	0	0	0	1	1	0	0	1	1	2	0	0	0	0
846	Bacteria	Proteobacteria	Gammaproteobacteria	1013-28-CG33	NA	NA	ASV_ 4736	24	24	0	0	0	0	0	0	0	0	0	0	0.000112451	0.000137359	0	0	0	0	0	0	0	0	0	0	2.08175e-05	1	1	0	0	0	0	0	0	0	0	0	0	2	0	0	0	0
847	Bacteria	Bdellovibrionota	Bdellovibrionia	Bacteriovoracales	Bacteriovoracaceae	NA	ASV_ 4748	23	28	0	2	14	19	0	0	0	0	7	0	0.000107765	0.000160253	0	7.76934e-06	5.49198e-05	7.42101e-05	0	0	0	0	1.90311e-05	0	3.5329e-05	1	1	0	0	0	0	0	0	0	0	0	0	2	0	0	0	0
848	Bacteria	Hydrogenedentes	Hydrogenedentia	Hydrogenedentiales	Hydrogenedensaceae	NA	ASV_ 4762	51	24	0	0	0	0	0	0	0	0	0	0	0.000238958	0.000137359	0	0	0	0	0	0	0	0	0	0	3.13598e-05	1	1	0	0	0	0	0	0	0	0	0	0	2	0	0	0	0
849	Bacteria	Bacteroidota	Bacteroidia	Chitinophagales	Chitinophagaceae	NA	ASV_ 4763	0	0	90	72	5	6	0	0	0	0	0	0	0	0	0.000287385	0.000279696	1.96142e-05	2.34348e-05	0	0	0	0	0	0	5.08442e-05	0	0	1	1	0	0	0	0	0	0	0	0	2	0	0	0	0
850	Bacteria	Proteobacteria	Alphaproteobacteria	Kordiimonadales	NA	NA	ASV_ 4777	51	26	0	0	0	0	0	0	0	0	0	0	0.000238958	0.000148806	0	0	0	0	0	0	0	0	0	0	3.23136e-05	1	1	0	0	0	0	0	0	0	0	0	0	2	0	0	0	0
851	Bacteria	Chloroflexi	Anaerolineae	SBR1031	A4b	OLB13	ASV_ 48	61	108	0	0	185	194	149	171	249	113	88	89	0.000285812	0.000618118	0	0	0.000725726	0.000757724	0.000478943	0.000466727	0.000791577	0.000377926	0.000239248	0.000238876	0.000415056	1	1	0	0	1	1	1	1	1	1	1	1	2	0	0	0	0
852	Bacteria	Chloroflexi	Anaerolineae	SBR1031	NA	NA	ASV_ 4825	50	31	0	0	0	0	0	0	0	16	40	32	0.000234272	0.000177423	0	0	0	0	0	0	0	5.35117e-05	0.000108749	8.58881e-05	5.4987e-05	1	1	0	0	0	0	0	0	0	0	1	0	2	0	0	0	0
853	Bacteria	Spirochaetota	Spirochaetia	Spirochaetales	Spirochaetaceae	Treponema	ASV_ 487	0	0	108	86	0	0	0	0	0	0	0	0	0	0	0.000344862	0.000334082	0	0	0	0	0	0	0	0	5.65786e-05	0	0	1	1	0	0	0	0	0	0	0	0	2	0	0	0	0
854	Bacteria	Myxococcota	Polyangia	Haliangiales	Haliangiaceae	Haliangium	ASV_ 4877	22	26	0	0	21	12	0	0	0	0	0	14	0.00010308	0.000148806	0	0	8.23798e-05	4.68695e-05	0	0	0	0	0	3.7576e-05	3.48926e-05	1	1	0	0	0	0	0	0	0	0	0	0	2	0	0	0	0
855	Bacteria	Verrucomicrobiota	Verrucomicrobiae	Chthoniobacterales	Terrimicrobiaceae	Terrimicrobium	ASV_ 488	659	411	17	13	0	0	8	0	0	0	0	0	0.00308771	0.00235228	5.42838e-05	5.05007e-05	0	0	2.5715e-05	0	0	0	0	0	0.000464207	1	1	0	0	0	0	0	0	0	0	0	0	2	0	0	0	0
856	Bacteria	Sumerlaeota	Sumerlaeia	Sumerlaeales	Sumerlaeaceae	Sumerlaea	ASV_ 493	10	15	513	515	148	84	18	10	138	152	16	21	4.68544e-05	8.58497e-05	0.00163809	0.00200061	0.000580581	0.000328087	5.78588e-05	2.7294e-05	0.000438705	0.000508361	4.34997e-05	5.6364e-05	0.000484346	0	0	1	1	1	1	0	0	1	1	0	0	2	0	0	0	0
857	Archaea	Crenarchaeota	Bathyarchaeia	NA	NA	NA	ASV_ 494	0	0	343	284	0	0	0	0	0	0	0	0	0	0	0.00109526	0.00110325	0	0	0	0	0	0	0	0	0.000183209	0	0	1	1	0	0	0	0	0	0	0	0	2	0	0	0	0
858	Bacteria	Myxococcota	Polyangia	Haliangiales	Haliangiaceae	Haliangium	ASV_ 4948	80	82	0	0	0	0	0	0	0	0	0	0	0.000374835	0.000469312	0	0	0	0	0	0	0	0	0	0	7.03456e-05	1	1	0	0	0	0	0	0	0	0	0	0	2	0	0	0	0
859	Bacteria	Elusimicrobiota	Elusimicrobia	Lineage IV	NA	NA	ASV_ 4950	0	0	68	82	0	12	0	0	0	0	0	0	0	0	0.000217135	0.000318543	0	4.68695e-05	0	0	0	0	0	0	4.85456e-05	0	0	1	1	0	0	0	0	0	0	0	0	2	0	0	0	0
860	Bacteria	Proteobacteria	Alphaproteobacteria	Rhodospirillales	Magnetospiraceae	NA	ASV_ 4968	39	38	7	0	0	0	0	0	0	0	25	0	0.000182732	0.000217486	2.23521e-05	0	0	0	0	0	0	0	6.79682e-05	0	4.08782e-05	1	1	0	0	0	0	0	0	0	0	0	0	2	0	0	0	0
861	Bacteria	Verrucomicrobiota	Verrucomicrobiae	Chthoniobacterales	Chthoniobacteraceae	NA	ASV_ 501	298	56	0	0	73	12	132	102	0	0	421	255	0.00139626	0.000320505	0	0	0.000286368	4.68695e-05	0.000424298	0.000278399	0	0	0.00114458	0.00068442	0.000381809	1	1	0	0	1	0	1	1	0	0	1	1	2	0	0	0	0
862	Bacteria	Gemmatimonadota	Gemmatimonadetes	Gemmatimonadales	Gemmatimonadaceae	Gemmatimonas	ASV_ 5012	40	41	0	0	0	0	0	0	0	0	0	0	0.000187418	0.000234656	0	0	0	0	0	0	0	0	0	0	3.51728e-05	1	1	0	0	0	0	0	0	0	0	0	0	2	0	0	0	0
863	Archaea	Crenarchaeota	Bathyarchaeia	NA	NA	NA	ASV_ 5013	26	30	0	1	0	0	0	0	41	23	0	38	0.000121822	0.000171699	0	3.88467e-06	0	0	0	0	0.00013034	7.69231e-05	0	0.000101992	5.05551e-05	1	1	0	0	0	0	0	0	1	0	0	1	2	0	0	0	0
864	Archaea	Crenarchaeota	Bathyarchaeia	NA	NA	NA	ASV_ 502	0	0	93	65	0	0	0	0	0	0	0	0	0	0	0.000296964	0.000252504	0	0	0	0	0	0	0	0	4.5789e-05	0	0	1	1	0	0	0	0	0	0	0	0	2	0	0	0	0
865	Bacteria	Firmicutes	NA	NA	NA	NA	ASV_ 5025	0	0	77	81	0	0	0	0	0	0	0	0	0	0	0.000245874	0.000314658	0	0	0	0	0	0	0	0	4.6711e-05	0	0	1	1	0	0	0	0	0	0	0	0	2	0	0	0	0
866	Bacteria	Planctomycetota	BD7-11	NA	NA	NA	ASV_ 5064	79	58	0	0	0	0	4	10	0	0	0	0	0.00037015	0.000331952	0	0	0	0	1.28575e-05	2.7294e-05	0	0	0	0	6.18545e-05	1	1	0	0	0	0	0	0	0	0	0	0	2	0	0	0	0
867	Bacteria	Planctomycetota	Phycisphaerae	MSBL9	SG8-4	NA	ASV_ 5069	35	23	0	0	0	0	0	0	24	27	21	25	0.00016399	0.000131636	0	0	0	0	0	0	7.62966e-05	9.0301e-05	5.70933e-05	6.71e-05	4.88681e-05	1	1	0	0	0	0	0	0	0	0	0	0	2	0	0	0	0
868	Bacteria	Proteobacteria	Gammaproteobacteria	Methylococcales	Methylohalobiaceae	Methylohalobius	ASV_ 507	27	28	0	0	174	35	57	0	276	235	606	457	0.000126507	0.000160253	0	0	0.000682575	0.000136703	0.00018322	0	0.00087741	0.000785953	0.00164755	0.00122659	0.000485563	1	1	0	0	1	1	1	0	1	1	1	1	2	0	0	0	0
869	Bacteria	Hydrogenedentes	Hydrogenedentia	Hydrogenedentiales	Hydrogenedensaceae	NA	ASV_ 5070	25	32	0	0	0	0	0	0	0	0	29	33	0.000117136	0.000183146	0	0	0	0	0	0	0	0	7.88431e-05	8.85721e-05	3.89748e-05	1	1	0	0	0	0	0	0	0	0	0	0	2	0	0	0	0
870	Bacteria	Firmicutes	NA	NA	NA	NA	ASV_ 5089	35	25	0	0	0	0	0	0	0	0	0	0	0.00016399	0.000143083	0	0	0	0	0	0	0	0	0	0	2.55894e-05	1	1	0	0	0	0	0	0	0	0	0	0	2	0	0	0	0
871	Bacteria	NA	NA	NA	NA	NA	ASV_ 5093	0	0	51	26	0	68	0	0	0	0	0	0	0	0	0.000162851	0.000101001	0	0.000265594	0	0	0	0	0	0	4.41206e-05	0	0	1	1	0	1	0	0	0	0	0	0	2	0	0	0	0
872	Bacteria	NA	NA	NA	NA	NA	ASV_ 5111	38	32	0	0	0	0	0	0	0	0	28	38	0.000178047	0.000183146	0	0	0	0	0	0	0	0	7.61244e-05	0.000101992	4.49424e-05	1	1	0	0	0	0	0	0	0	0	0	1	2	0	0	0	0
873	Bacteria	NA	NA	NA	NA	NA	ASV_ 5117	0	0	43	62	0	0	0	0	0	0	0	0	0	0	0.000137306	0.00024085	0	0	0	0	0	0	0	0	3.1513e-05	0	0	1	1	0	0	0	0	0	0	0	0	2	0	0	0	0
874	Bacteria	Verrucomicrobiota	Kiritimatiellae	WCHB1-41	NA	NA	ASV_ 513	0	9	176	155	26	28	0	0	301	305	50	68	0	5.15098e-05	0.000561997	0.000602124	0.000101994	0.000109362	0	0	0.000956886	0.00102007	0.000135936	0.000182512	0.000310199	0	0	1	1	1	1	0	0	1	1	1	1	2	0	0	0	0
875	Bacteria	Proteobacteria	Alphaproteobacteria	Rickettsiales	SM2D12	NA	ASV_ 5140	61	71	0	0	0	0	0	0	0	0	0	0	0.000285812	0.000406355	0	0	0	0	0	0	0	0	0	0	5.76806e-05	1	1	0	0	0	0	0	0	0	0	0	0	2	0	0	0	0
876	Bacteria	Chloroflexi	Chloroflexia	Chloroflexales	Chloroflexaceae	Candidatus Chloroploca	ASV_ 5141	49	75	0	0	0	0	0	0	0	0	0	16	0.000229587	0.000429248	0	0	0	0	0	0	0	0	0	4.2944e-05	5.84816e-05	1	1	0	0	0	0	0	0	0	0	0	0	2	0	0	0	0
877	Bacteria	Desulfobacterota	Desulfuromonadia	PB19	NA	NA	ASV_ 5244	45	36	5	0	0	0	0	0	0	0	0	0	0.000210845	0.000206039	1.59658e-05	0	0	0	0	0	0	0	0	0	3.60708e-05	1	1	0	0	0	0	0	0	0	0	0	0	2	0	0	0	0
878	Bacteria	Hydrogenedentes	Hydrogenedentia	Hydrogenedentiales	Hydrogenedensaceae	NA	ASV_ 5246	50	53	12	14	0	0	5	6	0	0	0	0	0.000234272	0.000303336	3.8318e-05	5.43854e-05	0	0	1.60719e-05	1.63764e-05	0	0	0	0	5.52299e-05	1	1	0	0	0	0	0	0	0	0	0	0	2	0	0	0	0
879	Bacteria	Spirochaetota	Leptospirae	Leptospirales	Leptospiraceae	NA	ASV_ 525	14	15	519	425	0	44	0	0	47	59	65	137	6.55962e-05	8.58497e-05	0.00165725	0.00165099	0	0.000171855	0	0	0.000149414	0.000197324	0.000176717	0.000367708	0.000376892	0	0	1	1	0	1	0	0	1	1	1	1	2	0	0	0	0
880	Bacteria	Proteobacteria	Alphaproteobacteria	NA	NA	NA	ASV_ 5261	35	70	0	0	0	0	0	0	0	0	0	0	0.00016399	0.000400632	0	0	0	0	0	0	0	0	0	0	4.70519e-05	1	1	0	0	0	0	0	0	0	0	0	0	2	0	0	0	0
881	Bacteria	Proteobacteria	Alphaproteobacteria	NA	NA	NA	ASV_ 5290	86	59	0	0	0	0	0	0	0	0	0	0	0.000402948	0.000337675	0	0	0	0	0	0	0	0	0	0	6.17186e-05	1	1	0	0	0	0	0	0	0	0	0	0	2	0	0	0	0
882	Archaea	Crenarchaeota	Bathyarchaeia	NA	NA	NA	ASV_ 530	0	0	578	563	0	0	0	0	0	0	0	0	0	0	0.00184565	0.00218707	0	0	0	0	0	0	0	0	0.00033606	0	0	1	1	0	0	0	0	0	0	0	0	2	0	0	0	0
883	Bacteria	Patescibacteria	Parcubacteria	NA	NA	NA	ASV_ 5332	64	79	0	0	0	0	0	0	0	0	0	0	0.000299868	0.000452142	0	0	0	0	0	0	0	0	0	0	6.26675e-05	1	1	0	0	0	0	0	0	0	0	0	0	2	0	0	0	0
884	Bacteria	Chloroflexi	Anaerolineae	SBR1031	A4b	NA	ASV_ 5333	39	71	0	0	0	0	0	0	0	0	0	0	0.000182732	0.000406355	0	0	0	0	0	0	0	0	0	0	4.90906e-05	1	1	0	0	0	0	0	0	0	0	0	0	2	0	0	0	0
885	Archaea	Crenarchaeota	Bathyarchaeia	NA	NA	NA	ASV_ 534	0	9	520	502	0	0	0	0	0	0	0	0	0	5.15098e-05	0.00166045	0.00195011	0	0	0	0	0	0	0	0	0.000305172	0	0	1	1	0	0	0	0	0	0	0	0	2	0	0	0	0
886	Bacteria	Proteobacteria	Gammaproteobacteria	Burkholderiales	Sutterellaceae	NA	ASV_ 535	0	0	36	34	0	0	0	0	0	0	0	0	0	0	0.000114954	0.000132079	0	0	0	0	0	0	0	0	2.05861e-05	0	0	1	1	0	0	0	0	0	0	0	0	2	0	0	0	0
887	Bacteria	Chloroflexi	Anaerolineae	Anaerolineales	Anaerolineaceae	Anaerolinea	ASV_ 5353	0	0	73	56	0	0	0	0	0	0	0	0	0	0	0.000233101	0.000217542	0	0	0	0	0	0	0	0	3.75536e-05	0	0	1	1	0	0	0	0	0	0	0	0	2	0	0	0	0
888	Bacteria	Elusimicrobiota	Elusimicrobia	Lineage IV	NA	NA	ASV_ 5376	64	77	0	0	0	0	0	0	0	0	0	0	0.000299868	0.000440695	0	0	0	0	0	0	0	0	0	0	6.17136e-05	1	1	0	0	0	0	0	0	0	0	0	0	2	0	0	0	0
889	Bacteria	Proteobacteria	Alphaproteobacteria	Rhizobiales	Hyphomicrobiaceae	Pedomicrobium	ASV_ 5377	34	22	0	0	0	0	0	0	0	0	47	38	0.000159305	0.000125913	0	0	0	0	0	0	0	0	0.00012778	0.000101992	4.29159e-05	1	1	0	0	0	0	0	0	0	0	1	1	2	0	0	0	0
890	Bacteria	Bacteroidota	Bacteroidia	Flavobacteriales	Schleiferiaceae	Schleiferia	ASV_ 54	0	0	112	92	0	0	295	255	279	278	16	29	0	0	0.000357634	0.00035739	0	0	0.000948242	0.000695997	0.000886948	0.000929766	4.34997e-05	7.78361e-05	0.000358109	0	0	1	1	0	0	1	1	1	1	0	0	2	0	0	0	0
891	Bacteria	Verrucomicrobiota	Verrucomicrobiae	Chthoniobacterales	NA	NA	ASV_ 540	146	84	0	0	0	0	0	0	0	0	426	411	0.000684075	0.000480758	0	0	0	0	0	0	0	0	0.00115818	0.00110312	0.000285511	1	1	0	0	0	0	0	0	0	0	1	1	2	0	0	0	0
892	Bacteria	Verrucomicrobiota	Verrucomicrobiae	Pedosphaerales	Pedosphaeraceae	NA	ASV_ 543	0	0	1227	1146	66	114	0	0	0	0	0	0	0	0	0.00391801	0.00445183	0.000258908	0.00044526	0	0	0	0	0	0	0.000756168	0	0	1	1	1	1	0	0	0	0	0	0	2	0	0	0	0
893	Bacteria	Planctomycetota	BD7-11	NA	NA	NA	ASV_ 5432	24	34	0	0	0	0	0	0	0	0	34	25	0.000112451	0.000194593	0	0	0	0	0	0	0	0	9.24368e-05	6.71e-05	3.88817e-05	1	1	0	0	0	0	0	0	0	0	0	0	2	0	0	0	0
894	Bacteria	Spirochaetota	Leptospirae	Leptospirales	Leptospiraceae	RBG-16-49-21	ASV_ 545	4	10	123	113	11	43	0	0	576	594	97	87	1.87418e-05	5.72331e-05	0.000392759	0.000438968	4.31513e-05	0.000167949	0	0	0.00183112	0.00198662	0.000263717	0.000233508	0.000452814	0	0	1	1	0	1	0	0	1	1	1	1	2	0	0	0	0
895	Bacteria	Thermotogota	Thermotogae	Thermotogales	Fervidobacteriaceae	Fervidobacterium	ASV_ 546	0	0	1207	1119	103	255	0	0	2	0	0	0	0	0	0.00385415	0.00434695	0.000404053	0.000995977	0	0	6.35805e-06	0	0	0	0.000800624	0	0	1	1	1	1	0	0	0	0	0	0	2	0	0	0	0
896	Bacteria	Proteobacteria	Gammaproteobacteria	Chromatiales	Sedimenticolaceae	NA	ASV_ 55	8	0	149	128	1742	611	0	0	13	21	596	512	3.74835e-05	0	0.000475781	0.000497238	0.0068336	0.00238644	0	0	4.13273e-05	7.02341e-05	0.00162036	0.00137421	0.00111139	0	0	1	1	1	1	0	0	0	0	1	1	2	0	0	0	0
897	Bacteria	Verrucomicrobiota	Omnitrophia	Omnitrophales	Omnitrophaceae	Candidatus Omnitrophus	ASV_ 550	0	4	996	971	11	38	0	0	54	49	0	5	0	2.28932e-05	0.00318039	0.00377202	4.31513e-05	0.00014842	0	0	0.000171667	0.00016388	0	1.342e-05	0.00062632	0	0	1	1	0	1	0	0	1	1	0	0	2	0	0	0	0
898	Bacteria	Sva0485	NA	NA	NA	NA	ASV_ 5534	0	18	0	26	11	12	0	37	0	1	25	5	0	0.00010302	0	0.000101001	4.31513e-05	4.68695e-05	0	0.000100988	0	3.34448e-06	6.79682e-05	1.342e-05	3.99802e-05	0	1	0	1	0	0	0	1	0	0	0	0	2	0	0	0	0
899	Bacteria	Proteobacteria	Gammaproteobacteria	Burkholderiales	NA	NA	ASV_ 5554	76	54	0	0	0	0	0	0	0	0	0	0	0.000356094	0.000309059	0	0	0	0	0	0	0	0	0	0	5.54294e-05	1	1	0	0	0	0	0	0	0	0	0	0	2	0	0	0	0
900	Bacteria	Spirochaetota	Spirochaetia	Spirochaetales	Spirochaetaceae	Treponema	ASV_ 556	0	9	101	93	9	48	0	0	80	75	0	0	0	5.15098e-05	0.00032251	0.000361274	3.53056e-05	0.000187478	0	0	0.000254322	0.000250836	0	0	0.000121936	0	0	1	1	0	1	0	0	1	1	0	0	2	0	0	0	0
901	Bacteria	Chloroflexi	Anaerolineae	SBR1031	A4b	NA	ASV_ 5610	30	31	0	0	0	0	0	0	0	0	22	39	0.000140563	0.000177423	0	0	0	0	0	0	0	0	5.9812e-05	0.000104676	4.02062e-05	1	1	0	0	0	0	0	0	0	0	0	1	2	0	0	0	0
902	Bacteria	Sva0485	NA	NA	NA	NA	ASV_ 5613	25	31	0	0	0	0	0	24	18	15	0	18	0.000117136	0.000177423	0	0	0	0	0	6.55056e-05	5.72224e-05	5.01672e-05	0	4.8312e-05	4.29805e-05	1	1	0	0	0	0	0	0	0	0	0	0	2	0	0	0	0
903	Bacteria	Proteobacteria	Gammaproteobacteria	Xanthomonadales	Xanthomonadaceae	Arenimonas	ASV_ 5663	59	70	0	0	0	0	0	0	0	0	0	0	0.000276441	0.000400632	0	0	0	0	0	0	0	0	0	0	5.64227e-05	1	1	0	0	0	0	0	0	0	0	0	0	2	0	0	0	0
904	Bacteria	NA	NA	NA	NA	NA	ASV_ 5678	0	0	59	64	0	0	0	5	0	0	0	0	0	0	0.000188397	0.000248619	0	0	0	1.3647e-05	0	0	0	0	3.75552e-05	0	0	1	1	0	0	0	0	0	0	0	0	2	0	0	0	0
905	Bacteria	Firmicutes	NA	NA	NA	NA	ASV_ 5679	0	0	52	76	0	0	0	0	0	0	0	0	0	0	0.000166045	0.000295235	0	0	0	0	0	0	0	0	3.844e-05	0	0	1	1	0	0	0	0	0	0	0	0	2	0	0	0	0
906	Bacteria	Bacteroidota	Bacteroidia	Chitinophagales	Saprospiraceae	NA	ASV_ 577	187	189	0	0	0	0	61	92	0	6	93	113	0.000876178	0.00108171	0	0	0	0	0.000196077	0.000251105	0	2.00669e-05	0.000252842	0.000303292	0.000248439	1	1	0	0	0	0	1	1	0	0	1	1	2	0	0	0	0
907	Bacteria	Nitrospirota	Thermodesulfovibrionia	NA	NA	NA	ASV_ 5825	26	33	6	6	8	1	30	0	3	7	0	3	0.000121822	0.000188869	1.9159e-05	2.3308e-05	3.13828e-05	3.90579e-06	9.64314e-05	0	9.53707e-06	2.34114e-05	0	8.05201e-06	4.38232e-05	1	1	0	0	0	0	0	0	0	0	0	0	2	0	0	0	0
908	Bacteria	NA	NA	NA	NA	NA	ASV_ 5826	3	0	59	56	0	0	0	0	0	0	0	0	1.40563e-05	0	0.000188397	0.000217542	0	0	0	0	0	0	0	0	3.49996e-05	0	0	1	1	0	0	0	0	0	0	0	0	2	0	0	0	0
909	Bacteria	Chloroflexi	Anaerolineae	Anaerolineales	Anaerolineaceae	GWD2-49-16	ASV_ 5827	0	0	73	50	0	0	0	0	0	0	0	0	0	0	0.000233101	0.000194234	0	0	0	0	0	0	0	0	3.56112e-05	0	0	1	1	0	0	0	0	0	0	0	0	2	0	0	0	0
910	Bacteria	Bdellovibrionota	Oligoflexia	0319-6G20	NA	NA	ASV_ 5850	52	70	0	0	0	0	0	0	0	0	0	0	0.000243643	0.000400632	0	0	0	0	0	0	0	0	0	0	5.36896e-05	1	1	0	0	0	0	0	0	0	0	0	0	2	0	0	0	0
911	Bacteria	Deinococcota	Deinococci	Thermales	Thermaceae	Thermus	ASV_ 587	90	66	31	23	995	986	0	0	20	17	17	0	0.00042169	0.000377739	9.89881e-05	8.93475e-05	0.00390323	0.00385111	0	0	6.35805e-05	5.68562e-05	4.62184e-05	0	0.000742397	1	1	0	0	1	1	0	0	0	0	0	0	2	0	0	0	0
912	Bacteria	Planctomycetota	Planctomycetes	Pirellulales	Pirellulaceae	Pirellula	ASV_ 5883	0	0	66	55	0	0	0	0	0	0	0	0	0	0	0.000210749	0.000213657	0	0	0	0	0	0	0	0	3.53671e-05	0	0	1	1	0	0	0	0	0	0	0	0	2	0	0	0	0
913	Bacteria	Campylobacterota	Campylobacteria	Campylobacterales	NA	NA	ASV_ 589	0	0	114	95	0	0	0	0	26	12	0	0	0	0	0.000364021	0.000369044	0	0	0	0	8.26546e-05	4.01338e-05	0	0	7.13211e-05	0	0	1	1	0	0	0	0	0	0	0	0	2	0	0	0	0
914	Bacteria	Chloroflexi	Anaerolineae	Anaerolineales	Anaerolineaceae	NA	ASV_ 59	55	47	0	0	102	157	0	0	0	0	1118	1742	0.000257699	0.000268996	0	0	0.00040013	0.000613209	0	0	0	0	0.00303954	0.00467553	0.000771259	1	1	0	0	1	1	0	0	0	0	1	1	2	0	0	0	0
915	Bacteria	Proteobacteria	Gammaproteobacteria	Immundisolibacterales	Immundisolibacteraceae	Immundisolibacter	ASV_ 5917	65	55	0	0	0	0	0	0	0	0	0	0	0.000304554	0.000314782	0	0	0	0	0	0	0	0	0	0	5.16113e-05	1	1	0	0	0	0	0	0	0	0	0	0	2	0	0	0	0
916	Bacteria	Chloroflexi	Anaerolineae	NA	NA	NA	ASV_ 5919	0	0	41	45	0	0	0	0	0	0	0	0	0	0	0.00013092	0.00017481	0	0	0	0	0	0	0	0	2.54775e-05	0	0	1	1	0	0	0	0	0	0	0	0	2	0	0	0	0
917	Bacteria	Proteobacteria	Gammaproteobacteria	Burkholderiales	Burkholderiaceae	Limnobacter	ASV_ 592	0	9	109	105	45	78	0	0	0	0	118	105	0	5.15098e-05	0.000348055	0.000407891	0.000176528	0.000304652	0	0	0	0	0.00032081	0.00028182	0.000157605	0	0	1	1	1	1	0	0	0	0	1	1	2	0	0	0	0
918	Bacteria	Chloroflexi	Anaerolineae	SBR1031	NA	NA	ASV_ 5958	55	55	0	0	0	0	0	0	0	0	9	0	0.000257699	0.000314782	0	0	0	0	0	0	0	0	2.44686e-05	0	4.97458e-05	1	1	0	0	0	0	0	0	0	0	0	0	2	0	0	0	0
919	Bacteria	Elusimicrobiota	Elusimicrobia	MVP-88	NA	NA	ASV_ 596	280	266	0	0	0	0	1376	825	0	9	59	49	0.00131192	0.0015224	0	0	0	0	0.00442299	0.00225175	0	3.01003e-05	0.000160405	0.000131516	0.000819257	1	1	0	0	0	0	1	1	0	0	1	1	2	0	0	0	0
920	Archaea	Crenarchaeota	Bathyarchaeia	NA	NA	NA	ASV_ 599	287	300	0	0	0	0	0	0	332	260	165	373	0.00134472	0.00171699	0	0	0	0	0	0	0.00105544	0.000869565	0.00044859	0.00100113	0.00053637	1	1	0	0	0	0	0	0	1	1	1	1	2	0	0	0	0
921	Bacteria	Chloroflexi	Anaerolineae	ADurb.Bin180	NA	NA	ASV_ 5993	0	0	69	38	0	0	0	0	0	0	0	0	0	0	0.000220328	0.000147618	0	0	0	0	0	0	0	0	3.06622e-05	0	0	1	1	0	0	0	0	0	0	0	0	2	0	0	0	0
922	Bacteria	Proteobacteria	Gammaproteobacteria	EPR3968-O8a-Bc78	NA	NA	ASV_ 5995	0	0	76	42	0	0	0	0	0	0	0	0	0	0	0.00024268	0.000163156	0	0	0	0	0	0	0	0	3.38197e-05	0	0	1	1	0	0	0	0	0	0	0	0	2	0	0	0	0
923	Bacteria	Bacteroidota	Bacteroidia	Chitinophagales	Saprospiraceae	NA	ASV_ 6	319	158	4	0	2533	555	8	13	71	98	1285	906	0.00149466	0.000904283	1.27727e-05	0	0.00993657	0.00216771	2.5715e-05	3.54822e-05	0.000225711	0.000327759	0.00349357	0.00243171	0.00175466	1	1	0	0	1	1	0	0	1	1	1	1	2	0	0	0	0
924	Bacteria	Chloroflexi	Anaerolineae	SBR1031	NA	NA	ASV_ 600	139	460	0	0	14	0	0	0	0	0	196	206	0.000651277	0.00263272	0	0	5.49198e-05	0	0	0	0	0	0.000532871	0.000552904	0.000368725	1	1	0	0	0	0	0	0	0	0	1	1	2	0	0	0	0
925	Bacteria	Proteobacteria	Alphaproteobacteria	Rhodobacterales	Rhodobacteraceae	Oceanicella	ASV_ 6023	49	0	31	28	0	0	0	0	0	0	0	0	0.000229587	0	9.89881e-05	0.000108771	0	0	0	0	0	0	0	0	3.64455e-05	1	0	0	1	0	0	0	0	0	0	0	0	2	0	0	0	0
926	Archaea	Crenarchaeota	Bathyarchaeia	NA	NA	NA	ASV_ 603	0	0	374	341	0	0	0	0	0	0	0	0	0	0	0.00119424	0.00132467	0	0	0	0	0	0	0	0	0.00020991	0	0	1	1	0	0	0	0	0	0	0	0	2	0	0	0	0
927	Bacteria	Chloroflexi	Dehalococcoidia	GIF9	AB-539-J10	SCGC-AB-539-J10	ASV_ 6057	63	0	53	0	0	0	0	0	0	0	0	0	0.000295183	0	0.000169238	0	0	0	0	0	0	0	0	0	3.87017e-05	1	0	1	0	0	0	0	0	0	0	0	0	2	0	0	0	0
928	Bacteria	Proteobacteria	Alphaproteobacteria	NA	NA	NA	ASV_ 6058	22	18	0	0	0	0	0	0	0	0	32	29	0.00010308	0.00010302	0	0	0	0	0	0	0	0	8.69993e-05	7.78361e-05	3.09112e-05	1	1	0	0	0	0	0	0	0	0	0	0	2	0	0	0	0
929	Bacteria	Nitrospirota	Thermodesulfovibrionia	NA	NA	NA	ASV_ 611	0	0	1308	1123	0	123	0	0	0	0	0	0	0	0	0.00417666	0.00436249	0	0.000480412	0	0	0	0	0	0	0.00075163	0	0	1	1	0	1	0	0	0	0	0	0	2	0	0	0	0
930	Bacteria	Acetothermia	Acetothermiia	NA	NA	NA	ASV_ 6164	46	28	16	0	0	9	0	0	0	9	0	0	0.00021553	0.000160253	5.10906e-05	0	0	3.51521e-05	0	0	0	3.01003e-05	0	0	4.10105e-05	1	1	0	0	0	0	0	0	0	0	0	0	2	0	0	0	0
931	Bacteria	Nitrospirota	Thermodesulfovibrionia	NA	NA	NA	ASV_ 617	0	0	1473	1284	0	0	0	0	0	0	0	0	0	0	0.00470353	0.00498792	0	0	0	0	0	0	0	0	0.000807621	0	0	1	1	0	0	0	0	0	0	0	0	2	0	0	0	0
932	Archaea	Crenarchaeota	Bathyarchaeia	NA	NA	NA	ASV_ 620	99	104	0	0	0	0	269	472	319	312	222	278	0.000463859	0.000595224	0	0	0	0	0.000864668	0.00128828	0.00101411	0.00104348	0.000603558	0.000746152	0.00055161	1	1	0	0	0	0	1	1	1	1	1	1	2	0	0	0	0
933	Bacteria	Myxococcota	Polyangia	Blfdi19	NA	NA	ASV_ 621	77	53	0	0	881	599	0	14	0	0	88	86	0.000360779	0.000303336	0	0	0.00345603	0.00233957	0	3.82116e-05	0	0	0.000239248	0.000230824	0.000580666	1	1	0	0	1	1	0	0	0	0	1	1	2	0	0	0	0
934	Bacteria	Firmicutes	Clostridia	Clostridiales	Caloramatoraceae	Thermobrachium	ASV_ 622	0	0	1244	737	93	22	49	24	59	78	17	21	0	0	0.0039723	0.002863	0.000364825	8.59274e-05	0.000157505	6.55056e-05	0.000187562	0.00026087	4.62184e-05	5.6364e-05	0.000671673	0	0	1	1	1	0	1	0	1	1	0	0	2	0	0	0	0
935	Bacteria	Firmicutes	NA	NA	NA	NA	ASV_ 6248	0	0	52	59	0	0	0	0	0	0	0	0	0	0	0.000166045	0.000229196	0	0	0	0	0	0	0	0	3.29367e-05	0	0	1	1	0	0	0	0	0	0	0	0	2	0	0	0	0
936	Bacteria	NA	NA	NA	NA	NA	ASV_ 6269	29	21	0	0	0	0	0	5	0	0	0	5	0.000135878	0.00012019	0	0	0	0	0	1.3647e-05	0	0	0	1.342e-05	2.35945e-05	1	1	0	0	0	0	0	0	0	0	0	0	2	0	0	0	0
937	Bacteria	Acidobacteriota	Thermoanaerobaculia	Thermoanaerobaculales	Thermoanaerobaculaceae	Subgroup 10	ASV_ 6275	71	26	0	0	0	0	0	0	0	0	0	0	0.000332666	0.000148806	0	0	0	0	0	0	0	0	0	0	4.01227e-05	1	1	0	0	0	0	0	0	0	0	0	0	2	0	0	0	0
938	Bacteria	Elusimicrobiota	Elusimicrobia	Lineage IV	NA	NA	ASV_ 6277	0	0	50	60	0	0	0	0	0	0	0	0	0	0	0.000159658	0.00023308	0	0	0	0	0	0	0	0	3.27282e-05	0	0	1	1	0	0	0	0	0	0	0	0	2	0	0	0	0
939	Bacteria	Calditrichota	Calditrichia	Calditrichales	Calditrichaceae	Caldithrix	ASV_ 628	0	13	125	54	0	8	0	7	149	107	108	136	0	7.44031e-05	0.000399146	0.000209772	0	3.12463e-05	0	1.91058e-05	0.000473675	0.00035786	0.000293623	0.000365024	0.000185321	0	0	1	1	0	0	0	0	1	1	1	1	2	0	0	0	0
940	Bacteria	Myxococcota	Polyangia	Nannocystales	Nannocystaceae	Nannocystis	ASV_ 6318	62	27	0	0	0	0	0	0	0	0	0	0	0.000290497	0.000154529	0	0	0	0	0	0	0	0	0	0	3.70856e-05	1	1	0	0	0	0	0	0	0	0	0	0	2	0	0	0	0
941	Bacteria	Nitrospirota	Thermodesulfovibrionia	NA	NA	NA	ASV_ 633	59	66	17	0	28	146	55	115	198	179	788	857	0.000276441	0.000377739	5.42838e-05	0	0.00010984	0.000570246	0.000176791	0.000313881	0.000629447	0.000598662	0.00214236	0.00230019	0.000629156	1	1	0	0	1	1	1	1	1	1	1	1	2	0	0	0	0
942	Bacteria	Bacteroidota	Bacteroidia	Bacteroidales	Prolixibacteraceae	NA	ASV_ 635	92	99	0	0	0	0	0	0	0	0	0	10	0.000431061	0.000566608	0	0	0	0	0	0	0	0	0	2.684e-05	8.53757e-05	1	1	0	0	0	0	0	0	0	0	0	0	2	0	0	0	0
943	Bacteria	NB1-j	NA	NA	NA	NA	ASV_ 636	25	27	0	0	0	0	884	1099	43	47	306	237	0.000117136	0.000154529	0	0	0	0	0.00284151	0.00299961	0.000136698	0.000157191	0.000831931	0.000636108	0.000656226	1	1	0	0	0	0	1	1	1	1	1	1	2	0	0	0	0
944	Bacteria	Proteobacteria	Alphaproteobacteria	Rhodospirillales	Magnetospirillaceae	NA	ASV_ 6360	48	60	0	0	0	0	0	0	0	0	0	0	0.000224901	0.000343399	0	0	0	0	0	0	0	0	0	0	4.73583e-05	1	1	0	0	0	0	0	0	0	0	0	0	2	0	0	0	0
945	Bacteria	Proteobacteria	Alphaproteobacteria	NA	NA	NA	ASV_ 6361	33	53	0	0	0	0	0	0	0	0	0	0	0.00015462	0.000303336	0	0	0	0	0	0	0	0	0	0	3.81629e-05	1	1	0	0	0	0	0	0	0	0	0	0	2	0	0	0	0
946	Archaea	Crenarchaeota	Bathyarchaeia	NA	NA	NA	ASV_ 6362	0	0	40	35	0	0	0	0	0	0	0	0	0	0	0.000127727	0.000135964	0	0	0	0	0	0	0	0	2.19742e-05	0	0	1	1	0	0	0	0	0	0	0	0	2	0	0	0	0
947	Bacteria	Bacteroidota	Bacteroidia	Cytophagales	Microscillaceae	NA	ASV_ 638	179	197	0	0	97	55	284	116	38	0	0	0	0.000838694	0.00112749	0	0	0.000380516	0.000214819	0.000912884	0.00031661	0.000120803	0	0	0	0.000325985	1	1	0	0	1	1	1	1	1	0	0	0	2	0	0	0	0
948	Bacteria	Proteobacteria	Gammaproteobacteria	Burkholderiales	Hydrogenophilaceae	Hydrogenophilus	ASV_ 639	0	0	648	455	63	253	0	0	0	0	0	0	0	0	0.00206917	0.00176753	0.000247139	0.000988165	0	0	0	0	0	0	0.000422667	0	0	1	1	1	1	0	0	0	0	0	0	2	0	0	0	0
949	Bacteria	Proteobacteria	Gammaproteobacteria	CCM19a	NA	NA	ASV_ 641	95	53	16	21	0	0	0	0	0	0	643	392	0.000445117	0.000303336	5.10906e-05	8.15781e-05	0	0	0	0	0	0	0.00174814	0.00105213	0.000306783	1	1	0	0	0	0	0	0	0	0	1	1	2	0	0	0	0
950	Bacteria	Sva0485	NA	NA	NA	NA	ASV_ 642	14	9	185	120	14	36	33	71	319	365	207	294	6.55962e-05	5.15098e-05	0.000590735	0.000466161	5.49198e-05	0.000140609	0.000106075	0.000193787	0.00101411	0.00122074	0.000562777	0.000789097	0.000438009	0	0	1	1	0	1	1	1	1	1	1	1	2	0	0	0	0
951	Bacteria	Proteobacteria	Gammaproteobacteria	Burkholderiales	NA	NA	ASV_ 644	0	15	421	308	25	100	127	156	145	194	53	44	0	8.58497e-05	0.00134432	0.00119648	9.80711e-05	0.000390579	0.000408226	0.000425786	0.000460958	0.000648829	0.000144093	0.000118096	0.000443441	0	0	1	1	0	1	1	1	1	1	1	1	2	0	0	0	0
952	Archaea	Crenarchaeota	Bathyarchaeia	NA	NA	NA	ASV_ 647	0	0	203	185	0	0	0	0	0	0	0	0	0	0	0.000648212	0.000718664	0	0	0	0	0	0	0	0	0.000113906	0	0	1	1	0	0	0	0	0	0	0	0	2	0	0	0	0
953	Bacteria	Hydrogenedentes	Hydrogenedentia	Hydrogenedentiales	Hydrogenedensaceae	NA	ASV_ 648	75	73	0	0	0	0	704	880	0	0	292	260	0.000351408	0.000417802	0	0	0	0	0.00226292	0.00240187	0	0	0.000793869	0.00069784	0.000577143	1	1	0	0	0	0	1	1	0	0	1	1	2	0	0	0	0
954	Archaea	Nanoarchaeota	Nanoarchaeia	Woesearchaeales	GW2011	AR15	ASV_ 649	0	0	482	612	0	0	0	0	181	174	0	14	0	0	0.00153911	0.00237742	0	0	0	0	0.000575403	0.00058194	0	3.7576e-05	0.000425954	0	0	1	1	0	0	0	0	1	1	0	0	2	0	0	0	0
955	Archaea	Thermoplasmatota	Thermoplasmata	SG8-5	NA	NA	ASV_ 655	0	0	109	143	0	0	0	0	0	0	494	618	0	0	0.000348055	0.000555508	0	0	0	0	0	0	0.00134305	0.00165871	0.000325444	0	0	1	1	0	0	0	0	0	0	1	1	2	0	0	0	0
956	Bacteria	Proteobacteria	Alphaproteobacteria	Rickettsiales	NA	NA	ASV_ 6567	47	43	0	0	0	0	0	0	0	0	0	0	0.000220216	0.000246102	0	0	0	0	0	0	0	0	0	0	3.88599e-05	1	1	0	0	0	0	0	0	0	0	0	0	2	0	0	0	0
957	Archaea	Crenarchaeota	Bathyarchaeia	NA	NA	NA	ASV_ 657	13	0	70	63	0	0	7	21	51	46	33	69	6.09108e-05	0	0.000223521	0.000244734	0	0	2.25007e-05	5.73174e-05	0.00016213	0.000153846	8.9718e-05	0.000185196	9.99896e-05	0	0	1	1	0	0	0	0	1	1	0	1	2	0	0	0	0
958	Bacteria	Acidobacteriota	Aminicenantia	Aminicenantales	NA	NA	ASV_ 658	0	0	242	172	0	0	0	0	0	0	0	0	0	0	0.000772746	0.000668164	0	0	0	0	0	0	0	0	0.000120076	0	0	1	1	0	0	0	0	0	0	0	0	2	0	0	0	0
959	Bacteria	NA	NA	NA	NA	NA	ASV_ 659	0	0	1134	1089	32	121	0	0	90	85	0	0	0	0	0.00362105	0.00423041	0.000125531	0.000472601	0	0	0.000286112	0.000284281	0	0	0.000751665	0	0	1	1	1	1	0	0	1	1	0	0	2	0	0	0	0
960	Archaea	Crenarchaeota	Bathyarchaeia	NA	NA	NA	ASV_ 660	0	0	203	192	0	0	0	0	0	0	0	0	0	0	0.000648212	0.000745857	0	0	0	0	0	0	0	0	0.000116172	0	0	1	1	0	0	0	0	0	0	0	0	2	0	0	0	0
961	Bacteria	Proteobacteria	Gammaproteobacteria	Burkholderiales	Hydrogenophilaceae	Annwodia	ASV_ 668	0	0	88	71	1267	619	0	0	0	0	0	0	0	0	0.000280998	0.000275812	0.00497025	0.00241769	0	0	0	0	0	0	0.000662062	0	0	1	1	1	1	0	0	0	0	0	0	2	0	0	0	0
962	Bacteria	Armatimonadota	DG-56	NA	NA	NA	ASV_ 6688	0	0	59	40	0	0	0	0	0	0	0	0	0	0	0.000188397	0.000155387	0	0	0	0	0	0	0	0	2.86486e-05	0	0	1	1	0	0	0	0	0	0	0	0	2	0	0	0	0
963	Bacteria	Bacteroidota	Bacteroidia	Bacteroidales	Williamwhitmaniaceae	Blvii28 wastewater-sludge group	ASV_ 6689	0	0	56	43	0	0	0	0	0	0	0	0	0	0	0.000178817	0.000167041	0	0	0	0	0	0	0	0	2.88215e-05	0	0	1	1	0	0	0	0	0	0	0	0	2	0	0	0	0
964	Archaea	Crenarchaeota	Bathyarchaeia	NA	NA	NA	ASV_ 674	0	0	77	55	0	0	0	0	0	0	0	0	0	0	0.000245874	0.000213657	0	0	0	0	0	0	0	0	3.82942e-05	0	0	1	1	0	0	0	0	0	0	0	0	2	0	0	0	0
965	Bacteria	Acidobacteriota	Subgroup 18	NA	NA	NA	ASV_ 6804	0	0	32	28	0	0	12	0	0	0	0	0	0	0	0.000102181	0.000108771	0	0	3.85726e-05	0	0	0	0	0	2.07937e-05	0	0	1	1	0	0	0	0	0	0	0	0	2	0	0	0	0
966	Bacteria	NA	NA	NA	NA	NA	ASV_ 681	17	0	201	162	16	0	0	0	43	68	129	274	7.96525e-05	0	0.000641826	0.000629317	6.27655e-05	0	0	0	0.000136698	0.000227425	0.000350716	0.000735416	0.000238651	0	0	1	1	0	0	0	0	1	1	1	1	2	0	0	0	0
967	Bacteria	Verrucomicrobiota	Verrucomicrobiae	Opitutales	Puniceicoccaceae	A714019	ASV_ 6871	54	38	0	0	0	0	0	0	0	0	0	0	0.000253014	0.000217486	0	0	0	0	0	0	0	0	0	0	3.92083e-05	1	1	0	0	0	0	0	0	0	0	0	0	2	0	0	0	0
968	Bacteria	Proteobacteria	Alphaproteobacteria	NA	NA	NA	ASV_ 6914	31	21	0	0	0	0	0	0	0	0	7	0	0.000145249	0.00012019	0	0	0	0	0	0	0	0	1.90311e-05	0	2.37058e-05	1	1	0	0	0	0	0	0	0	0	0	0	2	0	0	0	0
969	Bacteria	Bacteroidota	Rhodothermia	Rhodothermales	Rhodothermaceae	NA	ASV_ 693	247	203	6	0	0	0	7	6	0	0	314	295	0.0011573	0.00116183	1.9159e-05	0	0	0	2.25007e-05	1.63764e-05	0	0	0.000853681	0.000791781	0.00033522	1	1	0	0	0	0	0	0	0	0	1	1	2	0	0	0	0
970	Bacteria	Chloroflexi	Anaerolineae	Anaerolineales	Anaerolineaceae	NA	ASV_ 6956	40	52	0	0	0	0	0	0	0	0	0	0	0.000187418	0.000297612	0	0	0	0	0	0	0	0	0	0	4.04192e-05	1	1	0	0	0	0	0	0	0	0	0	0	2	0	0	0	0
971	Archaea	Crenarchaeota	Bathyarchaeia	NA	NA	NA	ASV_ 6957	0	0	42	26	0	0	0	0	0	0	0	0	0	0	0.000134113	0.000101001	0	0	0	0	0	0	0	0	1.95929e-05	0	0	1	1	0	0	0	0	0	0	0	0	2	0	0	0	0
972	Archaea	Crenarchaeota	Bathyarchaeia	NA	NA	NA	ASV_ 696	149	148	0	0	0	0	0	0	150	170	148	130	0.000698131	0.00084705	0	0	0	0	0	0	0.000476854	0.000568562	0.000402372	0.00034892	0.000278491	1	1	0	0	0	0	0	0	1	1	1	1	2	0	0	0	0
973	Bacteria	Bacteroidota	Bacteroidia	Sphingobacteriales	NS11-12 marine group	NA	ASV_ 6999	35	56	0	0	0	0	0	0	0	0	0	0	0.00016399	0.000320505	0	0	0	0	0	0	0	0	0	0	4.03747e-05	1	1	0	0	0	0	0	0	0	0	0	0	2	0	0	0	0
974	Bacteria	Nitrospirota	Nitrospiria	Nitrospirales	Nitrospiraceae	Nitrospira	ASV_ 701	63	50	0	0	0	0	926	891	0	0	158	167	0.000295183	0.000286166	0	0	0	0	0.00297652	0.00243189	0	0	0.000429559	0.000448228	0.000572296	1	1	0	0	0	0	1	1	0	0	1	1	2	0	0	0	0
975	Bacteria	Cyanobacteria	Cyanobacteria	Leptolyngbyales	Leptolyngbyaceae	NA	ASV_ 704	106	21	15	0	0	0	0	0	0	0	0	0	0.000496657	0.00012019	4.78975e-05	0	0	0	0	0	0	0	0	0	5.53953e-05	1	1	0	0	0	0	0	0	0	0	0	0	2	0	0	0	0
976	Bacteria	Acidobacteriota	Acidobacteriae	Bryobacterales	Bryobacteraceae	Bryobacter	ASV_ 705	34	48	14	17	40	29	0	0	194	255	478	387	0.000159305	0.000274719	4.47043e-05	6.60394e-05	0.000156914	0.000113268	0	0	0.000616731	0.000852843	0.00129955	0.00103871	0.000385232	1	1	0	0	1	1	0	0	1	1	1	1	2	0	0	0	0
977	Bacteria	Desulfobacterota	Desulfuromonadia	NA	NA	NA	ASV_ 7050	33	21	0	0	0	0	0	0	0	0	0	6	0.00015462	0.00012019	0	0	0	0	0	0	0	0	0	1.6104e-05	2.42428e-05	1	1	0	0	0	0	0	0	0	0	0	0	2	0	0	0	0
978	Bacteria	Proteobacteria	Gammaproteobacteria	Burkholderiales	TRA3-20	NA	ASV_ 7092	37	44	0	0	0	0	0	0	0	0	0	8	0.000173361	0.000251826	0	0	0	0	0	0	0	0	0	2.1472e-05	3.72216e-05	1	1	0	0	0	0	0	0	0	0	0	0	2	0	0	0	0
979	Bacteria	Chloroflexi	Anaerolineae	ADurb.Bin180	NA	NA	ASV_ 71	0	0	116	96	46	29	1861	1794	616	688	483	328	0	0	0.000370407	0.000372928	0.000180451	0.000113268	0.00598196	0.00489654	0.00195828	0.002301	0.00131315	0.000880353	0.00153069	0	0	1	1	1	1	1	1	1	1	1	1	2	0	0	0	0
980	Bacteria	Bdellovibrionota	Bdellovibrionia	Bdellovibrionales	Bdellovibrionaceae	OM27 clade	ASV_ 712	95	63	0	0	1102	409	0	0	0	0	133	78	0.000445117	0.000360569	0	0	0.00432298	0.00159747	0	0	0	0	0.000361591	0.000209352	0.000608089	1	1	0	0	1	1	0	0	0	0	1	1	2	0	0	0	0
981	Bacteria	Armatimonadota	NA	NA	NA	NA	ASV_ 715	22	32	14	14	18	10	25	23	28	18	11	27	0.00010308	0.000183146	4.47043e-05	5.43854e-05	7.06112e-05	3.90579e-05	8.03595e-05	6.27762e-05	8.90127e-05	6.02007e-05	2.9906e-05	7.2468e-05	7.41423e-05	1	1	0	0	0	0	0	0	0	0	0	0	2	0	0	0	0
982	Archaea	Nanoarchaeota	Nanoarchaeia	Woesearchaeales	NA	NA	ASV_ 716	0	0	777	862	0	0	0	4	34	62	46	48	0	0	0.00248109	0.00334859	0	0	0	1.09176e-05	0.000108087	0.000207358	0.000125062	0.000128832	0.000534161	0	0	1	1	0	0	0	0	1	1	1	1	2	0	0	0	0
983	Bacteria	Myxococcota	Myxococcia	Myxococcales	Anaeromyxobacteraceae	Anaeromyxobacter	ASV_ 7176	62	25	0	0	0	0	0	0	0	0	0	0	0.000290497	0.000143083	0	0	0	0	0	0	0	0	0	0	3.61317e-05	1	1	0	0	0	0	0	0	0	0	0	0	2	0	0	0	0
984	Bacteria	Bacteroidota	Bacteroidia	Bacteroidales	SB-5	NA	ASV_ 7178	0	0	45	42	0	0	0	0	0	0	0	0	0	0	0.000143692	0.000163156	0	0	0	0	0	0	0	0	2.55707e-05	0	0	1	1	0	0	0	0	0	0	0	0	2	0	0	0	0
985	Bacteria	Latescibacterota	NA	NA	NA	NA	ASV_ 718	598	607	0	0	0	0	0	0	0	0	0	0	0.00280189	0.00347405	0	0	0	0	0	0	0	0	0	0	0.000522995	1	1	0	0	0	0	0	0	0	0	0	0	2	0	0	0	0
986	Bacteria	Cyanobacteria	Cyanobacteria	Cyanobacteriales	NA	NA	ASV_ 721	588	572	0	0	0	0	0	0	0	0	0	0	0.00275504	0.00327373	0	0	0	0	0	0	0	0	0	0	0.000502398	1	1	0	0	0	0	0	0	0	0	0	0	2	0	0	0	0
987	Bacteria	Bacteroidota	Bacteroidia	Cytophagales	Cyclobacteriaceae	Ekhidna	ASV_ 722	83	122	0	0	5	30	0	0	0	0	0	0	0.000388892	0.000698244	0	0	1.96142e-05	0.000117174	0	0	0	0	0	0	0.000101994	1	1	0	0	0	1	0	0	0	0	0	0	2	0	0	0	0
988	Bacteria	Myxococcota	Polyangia	Haliangiales	Haliangiaceae	Haliangium	ASV_ 7224	33	41	0	0	0	0	0	0	0	0	0	0	0.00015462	0.000234656	0	0	0	0	0	0	0	0	0	0	3.24396e-05	1	1	0	0	0	0	0	0	0	0	0	0	2	0	0	0	0
989	Archaea	Crenarchaeota	Bathyarchaeia	NA	NA	NA	ASV_ 7228	0	0	41	45	0	0	0	0	0	0	0	0	0	0	0.00013092	0.00017481	0	0	0	0	0	0	0	0	2.54775e-05	0	0	1	1	0	0	0	0	0	0	0	0	2	0	0	0	0
990	Archaea	Crenarchaeota	Nitrososphaeria	Nitrososphaerales	Nitrososphaeraceae	Candidatus Nitrososphaera	ASV_ 7229	0	0	32	54	0	0	0	0	0	0	0	0	0	0	0.000102181	0.000209772	0	0	0	0	0	0	0	0	2.59961e-05	0	0	1	1	0	0	0	0	0	0	0	0	2	0	0	0	0
991	Bacteria	Chloroflexi	Anaerolineae	SBR1031	NA	NA	ASV_ 726	15	0	133	92	34	14	85	87	456	637	66	48	7.02816e-05	0	0.000424691	0.00035739	0.000133377	5.46811e-05	0.000273222	0.000237458	0.00144963	0.00213043	0.000179436	0.000128832	0.000453286	0	0	1	1	1	0	1	1	1	1	1	1	2	0	0	0	0
992	Archaea	Crenarchaeota	Bathyarchaeia	NA	NA	NA	ASV_ 7273	22	31	0	0	0	0	0	20	5	0	0	7	0.00010308	0.000177423	0	0	0	0	0	5.4588e-05	1.58951e-05	0	0	1.8788e-05	3.08145e-05	1	1	0	0	0	0	0	0	0	0	0	0	2	0	0	0	0
993	Bacteria	Proteobacteria	Alphaproteobacteria	Rhodobacterales	Rhodobacteraceae	NA	ASV_ 7274	22	27	0	0	0	0	1	2	0	0	30	3	0.00010308	0.000154529	0	0	0	0	3.21438e-06	5.4588e-06	0	0	8.15619e-05	8.05201e-06	2.9658e-05	1	1	0	0	0	0	0	0	0	0	0	0	2	0	0	0	0
994	Bacteria	Planctomycetota	BD7-11	NA	NA	NA	ASV_ 729	0	0	132	123	32	15	21	11	106	64	0	0	0	0	0.000421498	0.000477815	0.000125531	5.85869e-05	6.7502e-05	3.00234e-05	0.000336976	0.000214047	0	0	0.000144332	0	0	1	1	1	0	0	0	1	1	0	0	2	0	0	0	0
995	Bacteria	NA	NA	NA	NA	NA	ASV_ 7372	0	0	50	31	0	0	0	0	0	0	0	0	0	0	0.000159658	0.000120425	0	0	0	0	0	0	0	0	2.33403e-05	0	0	1	1	0	0	0	0	0	0	0	0	2	0	0	0	0
996	Bacteria	Chloroflexi	Anaerolineae	NA	NA	NA	ASV_ 7379	0	0	42	30	0	0	0	0	0	0	0	0	0	0	0.000134113	0.00011654	0	0	0	0	0	0	0	0	2.08878e-05	0	0	1	1	0	0	0	0	0	0	0	0	2	0	0	0	0
997	Bacteria	Patescibacteria	Gracilibacteria	Absconditabacteriales (SR1)	NA	NA	ASV_ 7415	32	33	0	0	0	0	0	0	0	0	6	0	0.000149934	0.000188869	0	0	0	0	0	0	0	0	1.63124e-05	0	2.9593e-05	1	1	0	0	0	0	0	0	0	0	0	0	2	0	0	0	0
998	Bacteria	Chloroflexi	Anaerolineae	Anaerolineales	Anaerolineaceae	NA	ASV_ 742	0	0	50	48	0	0	0	0	0	0	0	0	0	0	0.000159658	0.000186464	0	0	0	0	0	0	0	0	2.88435e-05	0	0	1	1	0	0	0	0	0	0	0	0	2	0	0	0	0
999	Bacteria	Myxococcota	Polyangia	Polyangiales	Polyangiaceae	Jahnella	ASV_ 7421	50	32	0	0	0	0	0	0	0	0	0	0	0.000234272	0.000183146	0	0	0	0	0	0	0	0	0	0	3.47848e-05	1	1	0	0	0	0	0	0	0	0	0	0	2	0	0	0	0
1000	Bacteria	Acidobacteriota	Aminicenantia	Aminicenantales	NA	NA	ASV_ 748	0	0	1109	979	15	21	0	0	0	0	0	0	0	0	0.00354122	0.00380309	5.88427e-05	8.20216e-05	0	0	0	0	0	0	0.000623765	0	0	1	1	0	0	0	0	0	0	0	0	2	0	0	0	0
1001	Bacteria	Proteobacteria	Alphaproteobacteria	Rhodospirillales	Rhodospirillaceae	NA	ASV_ 7514	43	37	0	0	0	0	0	0	0	0	0	0	0.000201474	0.000211763	0	0	0	0	0	0	0	0	0	0	3.44364e-05	1	1	0	0	0	0	0	0	0	0	0	0	2	0	0	0	0
1002	Bacteria	Proteobacteria	Gammaproteobacteria	Methylococcales	Methylomonadaceae	NA	ASV_ 752	51	50	0	0	70	70	0	0	0	0	0	0	0.000238958	0.000286166	0	0	0.000274599	0.000273405	0	0	0	0	0	0	8.94273e-05	1	1	0	0	1	1	0	0	0	0	0	0	2	0	0	0	0
1003	Bacteria	Myxococcota	Polyangia	Polyangiales	Polyangiaceae	Polyangium	ASV_ 753	69	59	29	17	20	102	0	0	0	0	233	182	0.000323296	0.000337675	9.26018e-05	6.60394e-05	7.84569e-05	0.000398391	0	0	0	0	0.000633464	0.000488488	0.000201534	1	1	0	0	0	1	0	0	0	0	1	1	2	0	0	0	0
1004	Bacteria	Proteobacteria	Alphaproteobacteria	Rhodospirillales	Magnetospirillaceae	NA	ASV_ 7613	37	41	0	0	0	0	0	0	0	0	0	0	0.000173361	0.000234656	0	0	0	0	0	0	0	0	0	0	3.40014e-05	1	1	0	0	0	0	0	0	0	0	0	0	2	0	0	0	0
1005	Bacteria	Proteobacteria	Alphaproteobacteria	NA	NA	NA	ASV_ 7615	0	0	37	41	0	0	0	0	0	0	0	0	0	0	0.000118147	0.000159272	0	0	0	0	0	0	0	0	2.31182e-05	0	0	1	1	0	0	0	0	0	0	0	0	2	0	0	0	0
1006	Bacteria	Planctomycetota	Planctomycetes	Pirellulales	Pirellulaceae	NA	ASV_ 7666	0	0	41	33	0	0	0	0	1	0	2	0	0	0	0.00013092	0.000128194	0	0	0	0	3.17902e-06	0	5.43746e-06	0	2.23109e-05	0	0	1	1	0	0	0	0	0	0	0	0	2	0	0	0	0
1007	Bacteria	Chloroflexi	Chloroflexia	Thermomicrobiales	AKYG1722	NA	ASV_ 767	147	81	10	0	9	0	447	411	44	54	114	82	0.00068876	0.000463588	3.19316e-05	0	3.53056e-05	0	0.00143683	0.00112178	0.000139877	0.000180602	0.000309935	0.000220088	0.000385725	1	1	0	0	0	0	1	1	1	1	1	1	2	0	0	0	0
1008	Archaea	Crenarchaeota	Bathyarchaeia	NA	NA	NA	ASV_ 769	0	0	82	57	0	0	0	0	0	0	0	0	0	0	0.000261839	0.000221426	0	0	0	0	0	0	0	0	4.02721e-05	0	0	1	1	0	0	0	0	0	0	0	0	2	0	0	0	0
1009	Archaea	Thermoplasmatota	Thermoplasmata	Marine Benthic Group D and DHVEG-1	NA	NA	ASV_ 7712	0	0	36	40	0	0	0	0	0	0	0	0	0	0	0.000114954	0.000155387	0	0	0	0	0	0	0	0	2.25284e-05	0	0	1	1	0	0	0	0	0	0	0	0	2	0	0	0	0
1010	Archaea	Crenarchaeota	Bathyarchaeia	NA	NA	NA	ASV_ 773	0	0	135	108	0	0	0	0	0	0	0	0	0	0	0.000431077	0.000419545	0	0	0	0	0	0	0	0	7.08851e-05	0	0	1	1	0	0	0	0	0	0	0	0	2	0	0	0	0
1011	Bacteria	Proteobacteria	Alphaproteobacteria	Rhizobiales	NA	NA	ASV_ 7757	46	29	0	0	0	0	0	0	0	0	0	0	0.00021553	0.000165976	0	0	0	0	0	0	0	0	0	0	3.17922e-05	1	1	0	0	0	0	0	0	0	0	0	0	2	0	0	0	0
1012	Bacteria	Proteobacteria	Alphaproteobacteria	Rhizobiales	Xanthobacteraceae	NA	ASV_ 7758	25	43	7	0	0	0	0	0	0	0	0	0	0.000117136	0.000246102	2.23521e-05	0	0	0	0	0	0	0	0	0	3.21326e-05	1	1	0	0	0	0	0	0	0	0	0	0	2	0	0	0	0
1013	Bacteria	Desulfobacterota	NA	NA	NA	NA	ASV_ 7801	45	29	0	0	0	0	0	0	0	0	0	0	0.000210845	0.000165976	0	0	0	0	0	0	0	0	0	0	3.14017e-05	1	1	0	0	0	0	0	0	0	0	0	0	2	0	0	0	0
1014	Bacteria	Proteobacteria	Alphaproteobacteria	Caulobacterales	Parvularculaceae	Amphiplicatus	ASV_ 7802	38	36	0	0	0	0	0	0	0	0	0	0	0.000178047	0.000206039	0	0	0	0	0	0	0	0	0	0	3.20072e-05	1	1	0	0	0	0	0	0	0	0	0	0	2	0	0	0	0
1015	Bacteria	Verrucomicrobiota	Verrucomicrobiae	Pedosphaerales	Pedosphaeraceae	Limisphaera	ASV_ 7803	0	0	42	32	0	0	0	0	0	0	0	0	0	0	0.000134113	0.000124309	0	0	0	0	0	0	0	0	2.15352e-05	0	0	1	1	0	0	0	0	0	0	0	0	2	0	0	0	0
1016	Archaea	Crenarchaeota	Bathyarchaeia	NA	NA	NA	ASV_ 781	62	30	0	0	43	0	0	0	0	0	0	0	0.000290497	0.000171699	0	0	0.000168682	0	0	0	0	0	0	0	5.25733e-05	1	1	0	0	1	0	0	0	0	0	0	0	2	0	0	0	0
1017	Bacteria	Desulfobacterota	Desulfobaccia	Desulfobaccales	Desulfobaccaceae	Desulfobacca	ASV_ 783	0	0	192	112	460	126	60	65	163	242	149	206	0	0	0.000613088	0.000435083	0.00180451	0.00049213	0.000192863	0.000177411	0.000518181	0.000809365	0.000405091	0.000552904	0.000500052	0	0	1	1	1	1	1	1	1	1	1	1	2	0	0	0	0
1018	Bacteria	Myxococcota	Polyangia	MSB-4B10	NA	NA	ASV_ 7866	46	27	0	0	0	0	0	0	0	0	0	0	0.00021553	0.000154529	0	0	0	0	0	0	0	0	0	0	3.08383e-05	1	1	0	0	0	0	0	0	0	0	0	0	2	0	0	0	0
1019	Bacteria	Aquificota	Aquificae	Aquificales	Aquificaceae	Hydrogenobacter	ASV_ 790	11	14	126	100	10	9	0	0	0	9	25	22	5.15399e-05	8.01264e-05	0.000402339	0.000388467	3.92285e-05	3.51521e-05	0	0	0	3.01003e-05	6.79682e-05	5.9048e-05	9.61641e-05	0	0	1	1	0	0	0	0	0	0	0	0	2	0	0	0	0
1020	Bacteria	WOR-1	NA	NA	NA	NA	ASV_ 791	34	22	20	24	112	250	191	324	425	231	104	113	0.000159305	0.000125913	6.38633e-05	9.32321e-05	0.000439359	0.000976448	0.000613947	0.000884325	0.00135109	0.000772575	0.000282748	0.000303292	0.000505508	1	1	0	0	1	1	1	1	1	1	1	1	2	0	0	0	0
1021	Bacteria	Patescibacteria	ABY1	Candidatus Uhrbacteria	NA	NA	ASV_ 7930	38	34	0	0	0	0	0	0	0	0	0	0	0.000178047	0.000194593	0	0	0	0	0	0	0	0	0	0	3.10533e-05	1	1	0	0	0	0	0	0	0	0	0	0	2	0	0	0	0
1022	Archaea	Crenarchaeota	Bathyarchaeia	NA	NA	NA	ASV_ 7933	0	0	37	29	0	0	0	0	0	0	0	0	0	0	0.000118147	0.000112655	0	0	0	0	0	0	0	0	1.92335e-05	0	0	1	1	0	0	0	0	0	0	0	0	2	0	0	0	0
1023	Bacteria	Proteobacteria	Alphaproteobacteria	Caulobacterales	Hyphomonadaceae	Hirschia	ASV_ 800	229	287	0	0	84	103	35	62	0	0	33	36	0.00107297	0.00164259	0	0	0.000329519	0.000402297	0.000112503	0.000169223	0	0	8.9718e-05	9.66241e-05	0.000326287	1	1	0	0	1	1	1	1	0	0	0	0	2	0	0	0	0
1024	Bacteria	Acidobacteriota	Thermoanaerobaculia	Thermoanaerobaculales	Thermoanaerobaculaceae	TPD-58	ASV_ 801	5	10	222	194	37	51	0	0	215	231	12	44	2.34272e-05	5.72331e-05	0.000708882	0.000753626	0.000145145	0.000199195	0	0	0.00068349	0.000772575	3.26247e-05	0.000118096	0.000291191	0	0	1	1	1	1	0	0	1	1	0	1	2	0	0	0	0
1025	Bacteria	Proteobacteria	Gammaproteobacteria	Burkholderiales	Nitrosomonadaceae	Nitrosomonas	ASV_ 802	291	197	0	0	0	0	9	0	0	0	101	81	0.00136346	0.00112749	0	0	0	0	2.89294e-05	0	0	0	0.000274592	0.000217404	0.00025099	1	1	0	0	0	0	0	0	0	0	1	1	2	0	0	0	0
1026	Bacteria	Proteobacteria	Alphaproteobacteria	Micavibrionales	Micavibrionaceae	NA	ASV_ 8047	37	33	0	0	0	0	0	0	0	0	0	0	0.000173361	0.000188869	0	0	0	0	0	0	0	0	0	0	3.01859e-05	1	1	0	0	0	0	0	0	0	0	0	0	2	0	0	0	0
1027	Bacteria	Proteobacteria	Gammaproteobacteria	NA	NA	NA	ASV_ 807	69	64	0	0	0	0	276	422	0	0	291	295	0.000323296	0.000366292	0	0	0	0	0.000887169	0.00115181	0	0	0.00079115	0.000791781	0.000359291	1	1	0	0	0	0	1	1	0	0	1	1	2	0	0	0	0
1028	Archaea	Crenarchaeota	Nitrososphaeria	SCGC AB-179-E04	NA	NA	ASV_ 810	53	33	0	0	15	20	0	0	0	0	0	0	0.000248328	0.000188869	0	0	5.88427e-05	7.81158e-05	0	0	0	0	0	0	4.78464e-05	1	1	0	0	0	0	0	0	0	0	0	0	2	0	0	0	0
1029	Bacteria	Bdellovibrionota	Bdellovibrionia	Bdellovibrionales	Bdellovibrionaceae	OM27 clade	ASV_ 8119	25	28	0	0	0	0	0	0	0	0	0	0	0.000117136	0.000160253	0	0	0	0	0	0	0	0	0	0	2.31157e-05	1	1	0	0	0	0	0	0	0	0	0	0	2	0	0	0	0
1030	Bacteria	NA	NA	NA	NA	NA	ASV_ 813	70	71	0	0	80	55	123	118	0	0	159	112	0.000327981	0.000406355	0	0	0.000313828	0.000214819	0.000395369	0.000322069	0	0	0.000432278	0.000300608	0.000226109	1	1	0	0	1	1	1	1	0	0	1	1	2	0	0	0	0
1031	Bacteria	Planctomycetota	Planctomycetes	Gemmatales	Gemmataceae	Gemmata	ASV_ 816	0	0	871	771	0	0	0	12	0	0	0	0	0	0	0.00278125	0.00299508	0	0	0	3.27528e-05	0	0	0	0	0.00048409	0	0	1	1	0	0	0	0	0	0	0	0	2	0	0	0	0
1032	Bacteria	Chloroflexi	Anaerolineae	SBR1031	A4b	NA	ASV_ 819	31	114	0	0	0	0	0	0	0	0	442	351	0.000145249	0.000652458	0	0	0	0	0	0	0	0	0.00120168	0.000942085	0.000245122	1	1	0	0	0	0	0	0	0	0	1	1	2	0	0	0	0
1033	Archaea	Crenarchaeota	Bathyarchaeia	NA	NA	NA	ASV_ 821	265	333	0	0	0	0	0	0	489	346	211	305	0.00124164	0.00190586	0	0	0	0	0	0	0.00155454	0.00115719	0.000573652	0.000818621	0.000604293	1	1	0	0	0	0	0	0	1	1	1	1	2	0	0	0	0
1034	Bacteria	Acidobacteriota	Aminicenantia	Aminicenantales	NA	NA	ASV_ 825	33	24	11	16	12	0	55	90	121	144	150	127	0.00015462	0.000137359	3.51248e-05	6.21547e-05	4.70741e-05	0	0.000176791	0.000245646	0.000384662	0.000481605	0.000407809	0.000340868	0.000206143	1	1	0	0	0	0	1	1	1	1	1	1	2	0	0	0	0
1035	Bacteria	Proteobacteria	Gammaproteobacteria	Burkholderiales	Sutterellaceae	NA	ASV_ 827	156	161	0	21	0	0	337	574	76	102	228	179	0.000730929	0.000921453	0	8.15781e-05	0	0	0.00108325	0.00156668	0.000241606	0.000341137	0.00061987	0.000480436	0.000505578	1	1	0	0	0	0	1	1	1	1	1	1	2	0	0	0	0
1036	Bacteria	Bacteroidota	Bacteroidia	Chitinophagales	37-13	NA	ASV_ 833	55	55	0	0	0	0	261	310	33	0	122	255	0.000257699	0.000314782	0	0	0	0	0.000838953	0.000846114	0.000104908	0	0.000331685	0.00068442	0.000281547	1	1	0	0	0	0	1	1	1	0	1	1	2	0	0	0	0
1037	Bacteria	Bacteroidota	Bacteroidia	Chitinophagales	37-13	NA	ASV_ 836	69	121	0	0	13	37	0	0	0	0	82	237	0.000323296	0.000692521	0	0	5.0997e-05	0.000144514	0	0	0	0	0.000222936	0.000636108	0.000172531	1	1	0	0	0	1	0	0	0	0	1	1	2	0	0	0	0
1038	Bacteria	Bdellovibrionota	Oligoflexia	Oligoflexales	Oligoflexaceae	Oligoflexus	ASV_ 842	34	29	0	9	0	0	0	7	0	0	22	24	0.000159305	0.000165976	0	3.4962e-05	0	0	0	1.91058e-05	0	0	5.9812e-05	6.4416e-05	4.19648e-05	1	1	0	0	0	0	0	0	0	0	0	0	2	0	0	0	0
1039	Bacteria	Proteobacteria	Alphaproteobacteria	Rhodospirillales	Magnetospirillaceae	Magnetospirillum	ASV_ 8424	33	26	0	0	0	0	0	0	0	0	0	0	0.00015462	0.000148806	0	0	0	0	0	0	0	0	0	0	2.52855e-05	1	1	0	0	0	0	0	0	0	0	0	0	2	0	0	0	0
1040	Archaea	Crenarchaeota	Bathyarchaeia	NA	NA	NA	ASV_ 8427	0	0	37	28	0	0	0	0	0	0	0	0	0	0	0.000118147	0.000108771	0	0	0	0	0	0	0	0	1.89098e-05	0	0	1	1	0	0	0	0	0	0	0	0	2	0	0	0	0
1041	Bacteria	Planctomycetota	OM190	NA	NA	NA	ASV_ 845	724	640	0	0	0	0	0	0	0	0	220	176	0.00339226	0.00366292	0	0	0	0	0	0	0	0	0.00059812	0.000472384	0.00067714	1	1	0	0	0	0	0	0	0	0	1	1	2	0	0	0	0
1042	Bacteria	Verrucomicrobiota	Kiritimatiellae	WCHB1-41	NA	NA	ASV_ 848	321	336	0	6	0	0	3	0	0	0	32	26	0.00150403	0.00192303	0	2.3308e-05	0	0	9.64314e-06	0	0	0	8.69993e-05	6.9784e-05	0.0003014	1	1	0	0	0	0	0	0	0	0	0	0	2	0	0	0	0
1043	Bacteria	Elusimicrobiota	Elusimicrobia	Lineage IV	NA	NA	ASV_ 8491	37	27	0	0	0	0	0	0	0	0	0	0	0.000173361	0.000154529	0	0	0	0	0	0	0	0	0	0	2.73242e-05	1	1	0	0	0	0	0	0	0	0	0	0	2	0	0	0	0
1044	Bacteria	NA	NA	NA	NA	NA	ASV_ 854	32	19	11	22	17	147	5	5	81	52	34	48	0.000149934	0.000108743	3.51248e-05	8.54628e-05	6.66884e-05	0.000574151	1.60719e-05	1.3647e-05	0.000257501	0.000173913	9.24368e-05	0.000128832	0.000141876	1	1	0	0	0	1	0	0	1	1	0	1	2	0	0	0	0
1045	Bacteria	Firmicutes	NA	NA	NA	NA	ASV_ 8565	0	0	34	29	0	0	0	0	0	0	0	0	0	0	0.000108568	0.000112655	0	0	0	0	0	0	0	0	1.84353e-05	0	0	1	1	0	0	0	0	0	0	0	0	2	0	0	0	0
1046	Bacteria	Latescibacterota	NA	NA	NA	NA	ASV_ 857	246	182	0	0	0	0	46	54	0	0	468	324	0.00115262	0.00104164	0	0	0	0	0.000147861	0.000147388	0	0	0.00127236	0.000869617	0.000385958	1	1	0	0	0	0	1	1	0	0	1	1	2	0	0	0	0
1047	Bacteria	Chloroflexi	Anaerolineae	SBR1031	NA	NA	ASV_ 866	501	567	0	0	0	0	0	0	0	0	92	92	0.00234741	0.00324512	0	0	0	0	0	0	0	0	0.000250123	0.000246928	0.000507465	1	1	0	0	0	0	0	0	0	0	1	1	2	0	0	0	0
1048	Bacteria	NA	NA	NA	NA	NA	ASV_ 870	137	78	0	0	46	17	128	174	310	417	269	205	0.000641906	0.000446418	0	0	0.000180451	6.63985e-05	0.000411441	0.000474915	0.000985497	0.00139465	0.000731338	0.00055022	0.000490269	1	1	0	0	1	0	1	1	1	1	1	1	2	0	0	0	0
1049	Bacteria	Proteobacteria	Alphaproteobacteria	Puniceispirillales	EF100-94H03	NA	ASV_ 8739	34	27	0	0	0	0	0	0	0	0	0	0	0.000159305	0.000154529	0	0	0	0	0	0	0	0	0	0	2.61529e-05	1	1	0	0	0	0	0	0	0	0	0	0	2	0	0	0	0
1050	Bacteria	Proteobacteria	Alphaproteobacteria	Tistrellales	Geminicoccaceae	Candidatus Alysiosphaera	ASV_ 880	14	0	207	96	64	32	49	36	12	29	68	35	6.55962e-05	0	0.000660985	0.000372928	0.000251062	0.000124985	0.000157505	9.82584e-05	3.81483e-05	9.699e-05	0.000184874	9.39401e-05	0.000178773	0	0	1	1	1	1	1	0	0	0	1	0	2	0	0	0	0
1051	Archaea	Crenarchaeota	Bathyarchaeia	NA	NA	NA	ASV_ 881	0	0	153	139	0	15	0	0	0	0	0	0	0	0	0.000488554	0.000539969	0	5.85869e-05	0	0	0	0	0	0	9.05925e-05	0	0	1	1	0	0	0	0	0	0	0	0	2	0	0	0	0
1052	Bacteria	Myxococcota	Polyangia	Nannocystales	Nannocystaceae	NA	ASV_ 884	51	70	0	0	0	0	0	0	0	0	207	127	0.000238958	0.000400632	0	0	0	0	0	0	0	0	0.000562777	0.000340868	0.000128603	1	1	0	0	0	0	0	0	0	0	1	1	2	0	0	0	0
1053	Bacteria	Proteobacteria	Alphaproteobacteria	Azospirillales	Azospirillaceae	NA	ASV_ 8894	27	28	0	0	0	0	0	0	0	0	0	0	0.000126507	0.000160253	0	0	0	0	0	0	0	0	0	0	2.38966e-05	1	1	0	0	0	0	0	0	0	0	0	0	2	0	0	0	0
1054	Bacteria	Proteobacteria	Alphaproteobacteria	Rhodobacterales	Rhodobacteraceae	Defluviimonas	ASV_ 891	32	20	0	0	82	0	29	28	13	29	63	37	0.000149934	0.000114466	0	0	0.000321673	0	9.3217e-05	7.64232e-05	4.13273e-05	9.699e-05	0.00017128	9.93081e-05	9.70516e-05	1	1	0	0	1	0	0	0	0	0	1	0	2	0	0	0	0
1055	Archaea	Crenarchaeota	Bathyarchaeia	NA	NA	NA	ASV_ 892	18	12	311	279	0	0	0	0	0	17	0	0	8.4338e-05	6.86797e-05	0.000993074	0.00108382	0	0	0	0	0	5.68562e-05	0	0	0.000190564	0	0	1	1	0	0	0	0	0	0	0	0	2	0	0	0	0
1056	Archaea	Crenarchaeota	Bathyarchaeia	NA	NA	NA	ASV_ 894	0	0	56	64	104	113	0	0	0	0	0	0	0	0	0.000178817	0.000248619	0.000407976	0.000441355	0	0	0	0	0	0	0.000106397	0	0	1	1	1	1	0	0	0	0	0	0	2	0	0	0	0
1057	Bacteria	Bdellovibrionota	Oligoflexia	Silvanigrellales	Silvanigrellaceae	NA	ASV_ 895	205	136	0	0	0	0	0	0	0	0	120	138	0.000960516	0.00077837	0	0	0	0	0	0	0	0	0.000326247	0.000370392	0.00020296	1	1	0	0	0	0	0	0	0	0	1	1	2	0	0	0	0
1058	Bacteria	Desulfobacterota	Desulfuromonadia	Geobacterales	Geobacteraceae	NA	ASV_ 905	0	0	50	33	21	17	0	0	22	32	0	0	0	0	0.000159658	0.000128194	8.23798e-05	6.63985e-05	0	0	6.99385e-05	0.000107023	0	0	5.11327e-05	0	0	1	1	0	0	0	0	0	1	0	0	2	0	0	0	0
1059	Bacteria	Cyanobacteria	Cyanobacteria	Chloroplast	NA	NA	ASV_ 91	874	720	0	0	0	0	0	0	0	0	0	0	0.00409508	0.00412078	0	0	0	0	0	0	0	0	0	0	0.000684655	1	1	0	0	0	0	0	0	0	0	0	0	2	0	0	0	0
1060	Archaea	Crenarchaeota	Bathyarchaeia	NA	NA	NA	ASV_ 912	116	109	0	0	70	106	104	153	240	221	152	152	0.000543511	0.000623841	0	0	0.000274599	0.000414014	0.000334296	0.000417598	0.000762966	0.00073913	0.000413247	0.000407968	0.000410931	1	1	0	0	1	1	1	1	1	1	1	1	2	0	0	0	0
1061	Bacteria	Planctomycetota	OM190	NA	NA	NA	ASV_ 913	91	51	0	12	75	72	82	54	0	0	167	121	0.000426375	0.000291889	0	4.66161e-05	0.000294213	0.000281217	0.000263579	0.000147388	0	0	0.000454028	0.000324764	0.000210839	1	1	0	0	1	1	1	1	0	0	1	1	2	0	0	0	0
1062	Bacteria	Zixibacteria	NA	NA	NA	NA	ASV_ 915	59	30	0	0	0	0	661	994	0	0	0	0	0.000276441	0.000171699	0	0	0	0	0.00212471	0.00271302	0	0	0	0	0.000440489	1	1	0	0	0	0	1	1	0	0	0	0	2	0	0	0	0
1063	Bacteria	Proteobacteria	Gammaproteobacteria	Burkholderiales	Nitrosomonadaceae	Nitrosomonas	ASV_ 918	379	323	27	12	0	0	0	0	0	0	0	0	0.00177578	0.00184863	8.62154e-05	4.66161e-05	0	0	0	0	0	0	0	0	0.000313104	1	1	0	0	0	0	0	0	0	0	0	0	2	0	0	0	0
1064	Bacteria	Firmicutes	Clostridia	Oscillospirales	Hungateiclostridiaceae	Ruminiclostridium	ASV_ 92	28	32	0	0	1328	2918	0	0	51	58	116	287	0.000131192	0.000183146	0	0	0.00520954	0.0113971	0	0	0.00016213	0.00019398	0.000315373	0.000770308	0.00153023	1	1	0	0	1	1	0	0	1	1	1	1	2	0	0	0	0
1065	Archaea	Crenarchaeota	Bathyarchaeia	NA	NA	NA	ASV_ 921	0	0	312	278	39	38	0	0	0	0	0	0	0	0	0.000996267	0.00107994	0.000152991	0.00014842	0	0	0	0	0	0	0.000198135	0	0	1	1	1	1	0	0	0	0	0	0	2	0	0	0	0
1066	Archaea	Crenarchaeota	Nitrososphaeria	SCGC AB-179-E04	NA	NA	ASV_ 922	75	91	0	0	0	0	29	78	302	175	130	154	0.000351408	0.000520821	0	0	0	0	9.3217e-05	0.000212893	0.000960065	0.000585284	0.000353435	0.000413336	0.000290872	1	1	0	0	0	0	0	1	1	1	1	1	2	0	0	0	0
1067	Bacteria	Desulfobacterota	Desulfobaccia	Desulfobaccales	Desulfobaccaceae	Desulfobacca	ASV_ 9273	37	18	0	0	0	0	0	0	0	0	0	0	0.000173361	0.00010302	0	0	0	0	0	0	0	0	0	0	2.30318e-05	1	1	0	0	0	0	0	0	0	0	0	0	2	0	0	0	0
1068	Bacteria	Verrucomicrobiota	Verrucomicrobiae	Pedosphaerales	Pedosphaeraceae	NA	ASV_ 9274	25	30	0	0	0	0	0	0	0	0	0	0	0.000117136	0.000171699	0	0	0	0	0	0	0	0	0	0	2.40696e-05	1	1	0	0	0	0	0	0	0	0	0	0	2	0	0	0	0
1069	Bacteria	Verrucomicrobiota	Verrucomicrobiae	Pedosphaerales	Pedosphaeraceae	NA	ASV_ 931	0	0	287	195	0	0	27	45	0	0	0	0	0	0	0.000916438	0.000757511	0	0	8.67883e-05	0.000122823	0	0	0	0	0.000156963	0	0	1	1	0	0	0	1	0	0	0	0	2	0	0	0	0
1070	Archaea	Crenarchaeota	Bathyarchaeia	NA	NA	NA	ASV_ 932	73	74	0	0	0	0	43	96	329	304	187	209	0.000342037	0.000423525	0	0	0	0	0.000138218	0.000262022	0.0010459	0.00101672	0.000508402	0.000560956	0.000358149	1	1	0	0	0	0	1	1	1	1	1	1	2	0	0	0	0
1071	Bacteria	Proteobacteria	Alphaproteobacteria	Rhodospirillales	Magnetospirillaceae	NA	ASV_ 9348	34	20	0	0	0	0	0	0	0	0	0	0	0.000159305	0.000114466	0	0	0	0	0	0	0	0	0	0	2.28143e-05	1	1	0	0	0	0	0	0	0	0	0	0	2	0	0	0	0
1072	Bacteria	NA	NA	NA	NA	NA	ASV_ 9424	30	23	0	0	0	0	0	0	0	0	0	0	0.000140563	0.000131636	0	0	0	0	0	0	0	0	0	0	2.26833e-05	1	1	0	0	0	0	0	0	0	0	0	0	2	0	0	0	0
1073	Bacteria	Desulfobacterota	Desulfobacteria	Desulfatiglandales	Desulfatiglandaceae	Desulfatiglans	ASV_ 946	0	0	142	115	0	0	0	0	105	135	27	0	0	0	0.000453429	0.000446737	0	0	0	0	0.000333797	0.000451505	7.34057e-05	0	0.000146573	0	0	1	1	0	0	0	0	1	1	0	0	2	0	0	0	0
1074	Bacteria	Thermotogota	Thermotogae	Thermotogales	Fervidobacteriaceae	Fervidobacterium	ASV_ 947	0	0	887	772	0	0	0	0	0	0	0	0	0	0	0.00283234	0.00299897	0	0	0	0	0	0	0	0	0.000485942	0	0	1	1	0	0	0	0	0	0	0	0	2	0	0	0	0
1075	Bacteria	Caldatribacteriota	Caldatribacteriia	Caldatribacteriales	Caldatribacteriaceae	Candidatus Caldatribacterium	ASV_ 948	6	0	101	55	56	14	50	32	68	41	48	60	2.81127e-05	0	0.00032251	0.000213657	0.000219679	5.46811e-05	0.000160719	8.73408e-05	0.000216174	0.000137124	0.000130499	0.00016104	0.000144295	0	0	1	1	1	0	1	0	1	1	1	1	2	0	0	0	0
1076	Bacteria	Acidobacteriota	Aminicenantia	Aminicenantales	NA	NA	ASV_ 950	0	0	82	64	0	0	0	0	0	0	0	0	0	0	0.000261839	0.000248619	0	0	0	0	0	0	0	0	4.25382e-05	0	0	1	1	0	0	0	0	0	0	0	0	2	0	0	0	0
1077	Bacteria	NA	NA	NA	NA	NA	ASV_ 953	0	0	395	357	0	0	0	0	100	125	0	0	0	0	0.0012613	0.00138683	0	0	0	0	0.000317902	0.00041806	0	0	0.000282008	0	0	1	1	0	0	0	0	1	1	0	0	2	0	0	0	0
1078	Bacteria	Verrucomicrobiota	Verrucomicrobiae	S-BQ2-57 soil group	NA	NA	ASV_ 957	7	0	40	36	0	0	23	30	3	0	402	519	3.27981e-05	0	0.000127727	0.000139848	0	0	7.39307e-05	8.1882e-05	9.53707e-06	0	0.00109293	0.001393	0.000245971	0	0	1	1	0	0	0	0	0	0	1	1	2	0	0	0	0
1079	Bacteria	Planctomycetota	Phycisphaerae	Phycisphaerales	Phycisphaeraceae	SM1A02	ASV_ 961	830	459	8	0	0	0	0	0	0	0	117	114	0.00388892	0.002627	2.55453e-05	0	0	0	0	0	0	0	0.000318091	0.000305976	0.000597128	1	1	0	0	0	0	0	0	0	0	1	1	2	0	0	0	0
1080	Bacteria	Bdellovibrionota	Bdellovibrionia	Bdellovibrionales	Bdellovibrionaceae	OM27 clade	ASV_ 9635	28	23	0	0	0	0	0	0	0	0	0	0	0.000131192	0.000131636	0	0	0	0	0	0	0	0	0	0	2.19024e-05	1	1	0	0	0	0	0	0	0	0	0	0	2	0	0	0	0
1081	Bacteria	Patescibacteria	Gracilibacteria	Absconditabacteriales (SR1)	NA	NA	ASV_ 9636	23	28	0	0	0	0	0	0	0	0	0	0	0.000107765	0.000160253	0	0	0	0	0	0	0	0	0	0	2.23348e-05	1	1	0	0	0	0	0	0	0	0	0	0	2	0	0	0	0
1082	Bacteria	Firmicutes	Clostridia	Clostridiales	Caloramatoraceae	Caloramator	ASV_ 966	0	0	353	253	63	0	0	0	88	111	63	59	0	0	0.00112719	0.000982822	0.000247139	0	0	0	0.000279754	0.000371237	0.00017128	0.000158356	0.000278148	0	0	1	1	1	0	0	0	1	1	1	1	2	0	0	0	0
1083	Bacteria	Proteobacteria	Alphaproteobacteria	Caulobacterales	Hyphomonadaceae	Hyphobacterium	ASV_ 9719	28	22	0	0	0	0	0	0	0	0	0	0	0.000131192	0.000125913	0	0	0	0	0	0	0	0	0	0	2.14254e-05	1	1	0	0	0	0	0	0	0	0	0	0	2	0	0	0	0
1084	Bacteria	Patescibacteria	Gracilibacteria	NA	NA	NA	ASV_ 9720	25	25	0	0	0	0	0	0	0	0	0	0	0.000117136	0.000143083	0	0	0	0	0	0	0	0	0	0	2.16849e-05	1	1	0	0	0	0	0	0	0	0	0	0	2	0	0	0	0
1085	Bacteria	Verrucomicrobiota	Verrucomicrobiae	Verrucomicrobiales	Rubritaleaceae	Luteolibacter	ASV_ 976	375	128	0	0	0	0	0	0	0	0	0	0	0.00175704	0.000732584	0	0	0	0	0	0	0	0	0	0	0.000207469	1	1	0	0	0	0	0	0	0	0	0	0	2	0	0	0	0
1086	Bacteria	Desulfobacterota	NA	NA	NA	NA	ASV_ 978	348	266	0	0	0	0	0	0	0	0	250	187	0.00163053	0.0015224	0	0	0	0	0	0	0	0	0.000679682	0.000501908	0.00036121	1	1	0	0	0	0	0	0	0	0	1	1	2	0	0	0	0
1087	Bacteria	Acidobacteriota	Acidobacteriae	Paludibaculum	NA	NA	ASV_ 979	44	23	0	0	0	0	0	0	0	0	16	12	0.000206159	0.000131636	0	0	0	0	0	0	0	0	4.34997e-05	3.2208e-05	3.44586e-05	1	1	0	0	0	0	0	0	0	0	0	0	2	0	0	0	0
1088	Bacteria	Bacteroidota	Bacteroidia	NA	NA	NA	ASV_ 980	0	0	84	88	0	0	29	39	322	385	0	0	0	0	0.000268226	0.000341851	0	0	9.3217e-05	0.000106447	0.00102365	0.00128763	0	0	0.000260084	0	0	1	1	0	0	0	1	1	1	0	0	2	0	0	0	0
1089	Archaea	Nanoarchaeota	Nanoarchaeia	Woesearchaeales	GW2011_GWC1_47_15	NA	ASV_ 981	406	433	0	0	0	0	256	286	0	0	44	136	0.00190229	0.00247819	0	0	0	0	0.000822881	0.000780608	0	0	0.000119624	0.000365024	0.000539052	1	1	0	0	0	0	1	1	0	0	1	1	2	0	0	0	0
1090	Bacteria	Proteobacteria	Gammaproteobacteria	NA	NA	NA	ASV_ 982	0	0	136	80	0	0	7	4	19	13	8	32	0	0	0.00043427	0.000310774	0	0	2.25007e-05	1.09176e-05	6.04014e-05	4.34783e-05	2.17498e-05	8.58881e-05	8.24983e-05	0	0	1	1	0	0	0	0	0	0	0	0	2	0	0	0	0
1091	Bacteria	Proteobacteria	Gammaproteobacteria	NA	NA	NA	ASV_ 9888	28	20	0	0	0	0	0	0	0	0	0	0	0.000131192	0.000114466	0	0	0	0	0	0	0	0	0	0	2.04716e-05	1	1	0	0	0	0	0	0	0	0	0	0	2	0	0	0	0
1092	Bacteria	Chloroflexi	Dehalococcoidia	MSBL5	NA	NA	ASV_ 9889	27	21	0	0	0	0	0	0	0	0	0	0	0.000126507	0.00012019	0	0	0	0	0	0	0	0	0	0	2.0558e-05	1	1	0	0	0	0	0	0	0	0	0	0	2	0	0	0	0
1093	Bacteria	Sva0485	NA	NA	NA	NA	ASV_ 994	0	0	150	138	0	10	0	10	122	98	77	128	0	0	0.000478975	0.000536085	0	3.90579e-05	0	2.7294e-05	0.000387841	0.000327759	0.000209342	0.000343552	0.000195825	0	0	1	1	0	0	0	0	1	1	1	1	2	0	0	0	0
1094	Bacteria	Proteobacteria	Gammaproteobacteria	CCD24	NA	NA	ASV_ 997	73	61	0	0	0	0	234	333	160	193	150	126	0.000342037	0.000349122	0	0	0	0	0.000752165	0.00090889	0.000508644	0.000645485	0.000407809	0.000338184	0.000354361	1	1	0	0	0	0	1	1	1	1	1	1	2	0	0	0	0
1095	Archaea	Crenarchaeota	Bathyarchaeia	NA	NA	NA	ASV_ 1000	70	0	0	0	0	0	0	0	0	0	0	0	0.000327981	0	0	0	0	0	0	0	0	0	0	0	2.73317e-05	1	0	0	0	0	0	0	0	0	0	0	0	1	0	0	0	0
1096	Bacteria	Proteobacteria	Gammaproteobacteria	Gammaproteobacteria Incertae Sedis	Unknown Family	Candidatus Berkiella	ASV_ 10174	37	8	0	0	0	0	0	0	0	0	0	0	0.000173361	4.57865e-05	0	0	0	0	0	0	0	0	0	0	1.82623e-05	1	0	0	0	0	0	0	0	0	0	0	0	1	0	0	0	0
1097	Archaea	Crenarchaeota	Bathyarchaeia	NA	NA	NA	ASV_ 10179	0	28	0	0	0	0	0	0	0	0	17	0	0	0.000160253	0	0	0	0	0	0	0	0	4.62184e-05	0	1.72059e-05	0	1	0	0	0	0	0	0	0	0	0	0	1	0	0	0	0
1098	Bacteria	Chloroflexi	Anaerolineae	Ardenticatenales	NA	NA	ASV_ 1018	20	22	0	0	0	0	730	402	0	0	106	85	9.37089e-05	0.000125913	0	0	0	0	0.0023465	0.00109722	0	0	0.000288185	0.00022814	0.000348305	0	1	0	0	0	0	1	1	0	0	1	1	1	0	0	0	0
1099	Archaea	Crenarchaeota	Bathyarchaeia	NA	NA	NA	ASV_ 1025	0	8	47	0	104	149	0	0	0	0	0	0	0	4.57865e-05	0.000150079	0	0.000407976	0.000581963	0	0	0	0	0	0	9.8817e-05	0	0	1	0	1	1	0	0	0	0	0	0	1	0	0	0	0
1100	Bacteria	Firmicutes	NA	NA	NA	NA	ASV_ 10271	14	22	0	0	0	0	0	0	0	0	0	6	6.55962e-05	0.000125913	0	0	0	0	0	0	0	0	0	1.6104e-05	1.73011e-05	0	1	0	0	0	0	0	0	0	0	0	0	1	0	0	0	0
1101	Bacteria	Proteobacteria	Gammaproteobacteria	NA	NA	NA	ASV_ 10276	0	44	0	0	0	0	0	0	0	0	0	0	0	0.000251826	0	0	0	0	0	0	0	0	0	0	2.09855e-05	0	1	0	0	0	0	0	0	0	0	0	0	1	0	0	0	0
1102	Bacteria	Armatimonadota	NA	NA	NA	NA	ASV_ 10277	0	0	0	37	0	0	0	0	7	0	0	0	0	0	0	0.000143733	0	0	0	0	2.22532e-05	0	0	0	1.38322e-05	0	0	0	1	0	0	0	0	0	0	0	0	1	0	0	0	0
1103	Bacteria	Chloroflexi	Anaerolineae	Caldilineales	Caldilineaceae	NA	ASV_ 10379	23	9	0	0	0	0	0	0	0	0	0	0	0.000107765	5.15098e-05	0	0	0	0	0	0	0	0	0	0	1.32729e-05	1	0	0	0	0	0	0	0	0	0	0	0	1	0	0	0	0
1104	Bacteria	Proteobacteria	Gammaproteobacteria	Xanthomonadales	NA	NA	ASV_ 10381	0	21	0	0	0	0	0	0	0	0	0	0	0	0.00012019	0	0	0	0	0	0	0	0	0	0	1.00158e-05	0	1	0	0	0	0	0	0	0	0	0	0	1	0	0	0	0
1105	Bacteria	Chloroflexi	Anaerolineae	RBG-13-54-9	NA	NA	ASV_ 10382	0	0	43	0	0	0	0	0	0	0	0	0	0	0	0.000137306	0	0	0	0	0	0	0	0	0	1.14422e-05	0	0	1	0	0	0	0	0	0	0	0	0	1	0	0	0	0
1106	Bacteria	Dadabacteria	Dadabacteriia	Dadabacteriales	NA	NA	ASV_ 1041	33	7	0	0	0	0	226	219	68	28	264	343	0.00015462	4.00632e-05	0	0	0	0	0.00072645	0.000597738	0.000216174	9.36455e-05	0.000717744	0.000920613	0.000288921	1	0	0	0	0	0	1	1	1	0	1	1	1	0	0	0	0
1107	Bacteria	Patescibacteria	Gracilibacteria	Absconditabacteriales (SR1)	NA	NA	ASV_ 10490	21	21	0	0	0	0	0	0	0	0	0	0	9.83943e-05	0.00012019	0	0	0	0	0	0	0	0	0	0	1.82153e-05	0	1	0	0	0	0	0	0	0	0	0	0	1	0	0	0	0
1108	Bacteria	Chloroflexi	Dehalococcoidia	661239	NA	NA	ASV_ 10491	0	0	42	0	0	0	0	0	0	0	0	0	0	0	0.000134113	0	0	0	0	0	0	0	0	0	1.11761e-05	0	0	1	0	0	0	0	0	0	0	0	0	1	0	0	0	0
1109	Archaea	Hadarchaeota	Hadarchaeia	Hadarchaeales	NA	NA	ASV_ 10616	0	0	0	34	0	0	0	0	0	0	0	0	0	0	0	0.000132079	0	0	0	0	0	0	0	0	1.10066e-05	0	0	0	1	0	0	0	0	0	0	0	0	1	0	0	0	0
1110	Bacteria	Myxococcota	Polyangia	Haliangiales	Haliangiaceae	Haliangium	ASV_ 10624	16	25	0	0	0	0	0	0	0	0	0	0	7.49671e-05	0.000143083	0	0	0	0	0	0	0	0	0	0	1.81708e-05	0	1	0	0	0	0	0	0	0	0	0	0	1	0	0	0	0
1111	Bacteria	Bdellovibrionota	Bdellovibrionia	Bdellovibrionales	Bdellovibrionaceae	Bdellovibrio	ASV_ 10625	15	21	0	0	0	0	0	0	0	0	0	0	7.02816e-05	0.00012019	0	0	0	0	0	0	0	0	0	0	1.58726e-05	0	1	0	0	0	0	0	0	0	0	0	0	1	0	0	0	0
1112	Bacteria	Campylobacterota	Campylobacteria	Campylobacterales	NA	NA	ASV_ 1063	0	0	27	30	0	0	0	0	404	262	0	0	0	0	8.62154e-05	0.00011654	0	0	0	0	0.00128433	0.000876254	0	0	0.000196945	0	0	0	1	0	0	0	0	1	1	0	0	1	0	0	0	0
1113	Bacteria	Planctomycetota	Planctomycetes	Pirellulales	Pirellulaceae	NA	ASV_ 1066	25	10	0	0	0	0	430	496	31	68	224	177	0.000117136	5.72331e-05	0	0	0	0	0.00138218	0.00135378	9.85497e-05	0.000227425	0.000608995	0.000475068	0.000360031	1	0	0	0	0	0	1	1	0	1	1	1	1	0	0	0	0
1114	Bacteria	Myxococcota	Polyangia	Polyangiales	Polyangiaceae	Pajaroellobacter	ASV_ 10753	25	15	0	0	0	0	0	0	0	0	0	0	0.000117136	8.58497e-05	0	0	0	0	0	0	0	0	0	0	1.69155e-05	1	0	0	0	0	0	0	0	0	0	0	0	1	0	0	0	0
1115	Archaea	Crenarchaeota	Bathyarchaeia	NA	NA	NA	ASV_ 10754	24	0	0	0	0	0	0	0	0	0	0	16	0.000112451	0	0	0	0	0	0	0	0	0	0	4.2944e-05	1.29496e-05	1	0	0	0	0	0	0	0	0	0	0	0	1	0	0	0	0
1116	Bacteria	Bdellovibrionota	Bdellovibrionia	Bdellovibrionales	Bdellovibrionaceae	OM27 clade	ASV_ 10755	17	23	0	0	0	0	0	0	0	0	0	0	7.96525e-05	0.000131636	0	0	0	0	0	0	0	0	0	0	1.76074e-05	0	1	0	0	0	0	0	0	0	0	0	0	1	0	0	0	0
1117	Bacteria	Chloroflexi	Anaerolineae	SBR1031	A4b	NA	ASV_ 10756	11	29	0	0	0	0	0	0	0	0	0	0	5.15399e-05	0.000165976	0	0	0	0	0	0	0	0	0	0	1.81263e-05	0	1	0	0	0	0	0	0	0	0	0	0	1	0	0	0	0
1118	Archaea	Crenarchaeota	Bathyarchaeia	NA	NA	NA	ASV_ 10760	0	0	0	27	0	0	0	0	0	0	0	0	0	0	0	0.000104886	0	0	0	0	0	0	0	0	8.74051e-06	0	0	0	1	0	0	0	0	0	0	0	0	1	0	0	0	0
1119	Bacteria	Myxococcota	Polyangia	Polyangiales	Sandaracinaceae	Sandaracinus	ASV_ 11023	0	20	0	0	0	18	0	0	0	0	0	0	0	0.000114466	0	0	0	7.03043e-05	0	0	0	0	0	0	1.53975e-05	0	1	0	0	0	0	0	0	0	0	0	0	1	0	0	0	0
1120	Archaea	Crenarchaeota	Bathyarchaeia	NA	NA	NA	ASV_ 11024	0	0	38	0	0	0	0	0	0	0	0	0	0	0	0.00012134	0	0	0	0	0	0	0	0	0	1.01117e-05	0	0	1	0	0	0	0	0	0	0	0	0	1	0	0	0	0
1121	Bacteria	Planctomycetota	Phycisphaerae	Phycisphaerales	Phycisphaeraceae	SM1A02	ASV_ 11147	22	15	0	0	0	0	0	0	0	0	0	0	0.00010308	8.58497e-05	0	0	0	0	0	0	0	0	0	0	1.57441e-05	1	0	0	0	0	0	0	0	0	0	0	0	1	0	0	0	0
1122	Bacteria	Gemmatimonadota	Gemmatimonadetes	Gemmatimonadales	Gemmatimonadaceae	NA	ASV_ 11148	17	20	0	0	0	0	0	0	0	0	0	0	7.96525e-05	0.000114466	0	0	0	0	0	0	0	0	0	0	1.61766e-05	0	1	0	0	0	0	0	0	0	0	0	0	1	0	0	0	0
1123	Bacteria	Chloroflexi	Anaerolineae	SBR1031	A4b	NA	ASV_ 11149	13	24	0	0	0	0	0	0	0	0	0	0	6.09108e-05	0.000137359	0	0	0	0	0	0	0	0	0	0	1.65225e-05	0	1	0	0	0	0	0	0	0	0	0	0	1	0	0	0	0
1124	Bacteria	Proteobacteria	Gammaproteobacteria	Burkholderiales	Burkholderiaceae	Limnobacter	ASV_ 1115	12	0	30	35	0	0	0	0	0	0	44	41	5.62253e-05	0	9.57949e-05	0.000135964	0	0	0	0	0	0	0.000119624	0.000110044	4.31377e-05	0	0	0	1	0	0	0	0	0	0	1	1	1	0	0	0	0
1125	Archaea	Crenarchaeota	Bathyarchaeia	NA	NA	NA	ASV_ 11152	0	0	0	32	0	0	0	0	0	0	0	0	0	0	0	0.000124309	0	0	0	0	0	0	0	0	1.03591e-05	0	0	0	1	0	0	0	0	0	0	0	0	1	0	0	0	0
1126	Bacteria	Chloroflexi	Anaerolineae	SBR1031	NA	NA	ASV_ 1118	21	23	0	0	0	0	0	0	0	0	26	44	9.83943e-05	0.000131636	0	0	0	0	0	0	0	0	7.06869e-05	0.000118096	3.49011e-05	0	1	0	0	0	0	0	0	0	0	0	1	1	0	0	0	0
1127	Bacteria	Patescibacteria	Gracilibacteria	Candidatus Peregrinibacteria	NA	NA	ASV_ 11279	24	12	0	0	0	0	0	0	0	0	0	0	0.000112451	6.86797e-05	0	0	0	0	0	0	0	0	0	0	1.50942e-05	1	0	0	0	0	0	0	0	0	0	0	0	1	0	0	0	0
1128	Bacteria	Spirochaetota	Spirochaetia	Spirochaetales	Spirochaetaceae	M2PT2-76 termite group	ASV_ 1134	0	0	33	16	27	21	0	0	25	49	0	0	0	0	0.000105374	6.21547e-05	0.000105917	8.20216e-05	0	0	7.94756e-05	0.00016388	0	0	4.99019e-05	0	0	1	0	1	0	0	0	0	1	0	0	1	0	0	0	0
1129	Bacteria	SAR324 clade(Marine group B)	NA	NA	NA	NA	ASV_ 11416	24	11	0	0	0	0	0	0	0	0	0	0	0.000112451	6.29564e-05	0	0	0	0	0	0	0	0	0	0	1.46173e-05	1	0	0	0	0	0	0	0	0	0	0	0	1	0	0	0	0
1130	Bacteria	Verrucomicrobiota	Verrucomicrobiae	Opitutales	Puniceicoccaceae	NA	ASV_ 11418	16	19	0	0	0	0	0	0	0	0	0	0	7.49671e-05	0.000108743	0	0	0	0	0	0	0	0	0	0	1.53092e-05	0	1	0	0	0	0	0	0	0	0	0	0	1	0	0	0	0
1131	Bacteria	Patescibacteria	Parcubacteria	Candidatus Kaiserbacteria	NA	NA	ASV_ 11563	14	20	0	0	0	0	0	0	0	0	0	0	6.55962e-05	0.000114466	0	0	0	0	0	0	0	0	0	0	1.50052e-05	0	1	0	0	0	0	0	0	0	0	0	0	1	0	0	0	0
1132	Bacteria	Cyanobacteria	Cyanobacteria	Cyanobacteriales	Coleofasciculaceae	NA	ASV_ 11565	0	34	0	0	0	0	0	0	0	0	0	0	0	0.000194593	0	0	0	0	0	0	0	0	0	0	1.62161e-05	0	1	0	0	0	0	0	0	0	0	0	0	1	0	0	0	0
1133	Bacteria	Proteobacteria	Gammaproteobacteria	Burkholderiales	Hydrogenophilaceae	Sulfuritortus	ASV_ 11566	0	20	0	0	0	0	11	0	0	0	0	0	0	0.000114466	0	0	0	0	3.53582e-05	0	0	0	0	0	1.24854e-05	0	1	0	0	0	0	0	0	0	0	0	0	1	0	0	0	0
1134	Bacteria	Proteobacteria	Alphaproteobacteria	Rhodobacterales	Rhodobacteraceae	NA	ASV_ 1160	427	0	0	0	0	0	0	454	0	0	422	0	0.00200068	0	0	0	0	0	0	0.00123915	0	0	0.0011473	0	0.000365595	1	0	0	0	0	0	0	1	0	0	1	0	1	0	0	0	0
1135	Bacteria	Bdellovibrionota	Bdellovibrionia	Bdellovibrionales	Bdellovibrionaceae	Bdellovibrio	ASV_ 11731	15	18	0	0	0	0	0	0	0	0	0	0	7.02816e-05	0.00010302	0	0	0	0	0	0	0	0	0	0	1.44418e-05	0	1	0	0	0	0	0	0	0	0	0	0	1	0	0	0	0
1136	Bacteria	Cyanobacteria	Cyanobacteria	Cyanobacteriales	Cyanobacteriales Incertae Sedis	Phormidium SAG 81.79	ASV_ 11732	13	20	0	0	0	0	0	0	0	0	0	0	6.09108e-05	0.000114466	0	0	0	0	0	0	0	0	0	0	1.46148e-05	0	1	0	0	0	0	0	0	0	0	0	0	1	0	0	0	0
1137	Bacteria	Bacteroidota	Bacteroidia	Cytophagales	Amoebophilaceae	Candidatus Amoebophilus	ASV_ 11916	0	32	0	0	0	0	0	0	0	0	0	0	0	0.000183146	0	0	0	0	0	0	0	0	0	0	1.52622e-05	0	1	0	0	0	0	0	0	0	0	0	0	1	0	0	0	0
1138	Archaea	Thermoplasmatota	Thermoplasmata	Marine Benthic Group D and DHVEG-1	NA	NA	ASV_ 11921	0	0	0	32	0	0	0	0	0	0	0	0	0	0	0	0.000124309	0	0	0	0	0	0	0	0	1.03591e-05	0	0	0	1	0	0	0	0	0	0	0	0	1	0	0	0	0
1139	Bacteria	Proteobacteria	Alphaproteobacteria	Rhizobiales	Xanthobacteraceae	NA	ASV_ 1194	37	12	0	0	0	0	643	561	0	0	0	0	0.000173361	6.86797e-05	0	0	0	0	0.00206685	0.00153119	0	0	0	0	0.000320007	1	0	0	0	0	0	1	1	0	0	0	0	1	0	0	0	0
1140	Bacteria	Chloroflexi	Dehalococcoidia	GIF9	NA	NA	ASV_ 12085	0	22	0	0	0	0	0	0	0	0	0	0	0	0.000125913	0	0	0	0	0	0	0	0	0	0	1.04927e-05	0	1	0	0	0	0	0	0	0	0	0	0	1	0	0	0	0
1141	Bacteria	Proteobacteria	Alphaproteobacteria	Micavibrionales	NA	NA	ASV_ 12089	11	20	0	0	0	0	0	0	0	0	0	0	5.15399e-05	0.000114466	0	0	0	0	0	0	0	0	0	0	1.38338e-05	0	1	0	0	0	0	0	0	0	0	0	0	1	0	0	0	0
1142	Bacteria	Chloroflexi	Anaerolineae	SBR1031	A4b	NA	ASV_ 1217	11	36	0	0	8	0	0	0	0	0	72	69	5.15399e-05	0.000206039	0	0	3.13828e-05	0	0	0	0	0	0.000195748	0.000185196	5.58255e-05	0	1	0	0	0	0	0	0	0	0	1	1	1	0	0	0	0
1143	Bacteria	Verrucomicrobiota	Kiritimatiellae	WCHB1-41	NA	NA	ASV_ 1221	0	0	37	21	47	50	0	0	0	0	0	0	0	0	0.000118147	8.15781e-05	0.000184374	0.00019529	0	0	0	0	0	0	4.82824e-05	0	0	1	0	1	1	0	0	0	0	0	0	1	0	0	0	0
1144	Bacteria	Spirochaetota	Spirochaetia	Spirochaetales	Spirochaetaceae	Spirochaeta	ASV_ 1222	0	0	39	0	0	0	0	29	0	0	0	0	0	0	0.000124533	0	0	0	0	7.91526e-05	0	0	0	0	1.69738e-05	0	0	1	0	0	0	0	0	0	0	0	0	1	0	0	0	0
1145	Bacteria	Chloroflexi	Chloroflexia	Thermomicrobiales	JG30-KF-CM45	NA	ASV_ 12252	30	0	0	0	0	0	0	0	0	0	0	0	0.000140563	0	0	0	0	0	0	0	0	0	0	0	1.17136e-05	1	0	0	0	0	0	0	0	0	0	0	0	1	0	0	0	0
1146	Bacteria	Proteobacteria	Alphaproteobacteria	Parvibaculales	Parvibaculaceae	Parvibaculum	ASV_ 12257	0	30	0	0	0	0	0	0	0	0	0	0	0	0.000171699	0	0	0	0	0	0	0	0	0	0	1.43083e-05	0	1	0	0	0	0	0	0	0	0	0	0	1	0	0	0	0
1147	Bacteria	Chloroflexi	Dehalococcoidia	GIF9	NA	NA	ASV_ 12258	0	18	3	0	8	0	0	0	0	0	0	1	0	0.00010302	9.57949e-06	0	3.13828e-05	0	0	0	0	0	0	2.684e-06	1.22222e-05	0	1	0	0	0	0	0	0	0	0	0	0	1	0	0	0	0
1148	Bacteria	Chloroflexi	JG30-KF-CM66	NA	NA	NA	ASV_ 1229	35	15	0	0	0	0	170	253	13	22	213	100	0.00016399	8.58497e-05	0	0	0	0	0.000546445	0.000690538	4.13273e-05	7.35786e-05	0.000579089	0.0002684	0.000204101	1	0	0	0	0	0	1	1	0	0	1	1	1	0	0	0	0
1149	Bacteria	Sva0485	NA	NA	NA	NA	ASV_ 1236	31	0	17	12	0	13	0	16	109	114	58	75	0.000145249	0	5.42838e-05	4.66161e-05	0	5.07753e-05	0	4.36704e-05	0.000346514	0.000381271	0.000157686	0.0002013	0.000118947	1	0	0	0	0	0	0	0	1	1	1	1	1	0	0	0	0
1150	Bacteria	Proteobacteria	Gammaproteobacteria	NA	NA	NA	ASV_ 12430	29	0	0	0	0	0	0	0	0	0	0	0	0.000135878	0	0	0	0	0	0	0	0	0	0	0	1.13232e-05	1	0	0	0	0	0	0	0	0	0	0	0	1	0	0	0	0
1151	Bacteria	Bdellovibrionota	Bdellovibrionia	Bdellovibrionales	Bdellovibrionaceae	OM27 clade	ASV_ 1259	0	31	0	0	563	114	0	0	0	0	0	0	0	0.000177423	0	0	0.00220856	0.00044526	0	0	0	0	0	0	0.000235937	0	1	0	0	1	1	0	0	0	0	0	0	1	0	0	0	0
1152	Bacteria	Chloroflexi	Dehalococcoidia	SAR202 clade	NA	NA	ASV_ 1262	19	21	11	15	0	0	134	173	156	144	61	58	8.90234e-05	0.00012019	3.51248e-05	5.82701e-05	0	0	0.000430727	0.000472186	0.000495928	0.000481605	0.000165842	0.000155672	0.000208714	0	1	0	0	0	0	1	1	1	1	1	1	1	0	0	0	0
1153	Bacteria	Chloroflexi	Anaerolineae	Anaerolineales	Anaerolineaceae	NA	ASV_ 1272	0	0	38	23	0	0	199	226	37	26	120	73	0	0	0.00012134	8.93475e-05	0	0	0.000639662	0.000616844	0.000117624	8.69565e-05	0.000326247	0.000195932	0.000182829	0	0	1	0	0	0	1	1	1	0	1	1	1	0	0	0	0
1154	Bacteria	Planctomycetota	BD7-11	NA	NA	NA	ASV_ 12824	0	24	0	0	0	0	0	0	0	0	0	0	0	0.000137359	0	0	0	0	0	0	0	0	0	0	1.14466e-05	0	1	0	0	0	0	0	0	0	0	0	0	1	0	0	0	0
1155	Archaea	Crenarchaeota	Bathyarchaeia	NA	NA	NA	ASV_ 12829	0	0	0	27	0	0	0	0	0	0	0	0	0	0	0	0.000104886	0	0	0	0	0	0	0	0	8.74051e-06	0	0	0	1	0	0	0	0	0	0	0	0	1	0	0	0	0
1156	Bacteria	Bacteroidota	Bacteroidia	Chitinophagales	37-13	NA	ASV_ 1283	0	61	0	0	0	0	0	0	0	0	105	200	0	0.000349122	0	0	0	0	0	0	0	0	0.000285466	0.0005368	9.76157e-05	0	1	0	0	0	0	0	0	0	0	1	1	1	0	0	0	0
1157	Bacteria	Chloroflexi	Dehalococcoidia	Dehalococcoidales	NA	NA	ASV_ 12830	0	0	0	27	0	0	0	0	0	0	0	0	0	0	0	0.000104886	0	0	0	0	0	0	0	0	8.74051e-06	0	0	0	1	0	0	0	0	0	0	0	0	1	0	0	0	0
1158	Bacteria	Proteobacteria	Alphaproteobacteria	Rhodospirillales	Magnetospirillaceae	NA	ASV_ 13045	26	0	0	0	0	0	0	0	0	0	0	0	0.000121822	0	0	0	0	0	0	0	0	0	0	0	1.01518e-05	1	0	0	0	0	0	0	0	0	0	0	0	1	0	0	0	0
1159	Bacteria	Chloroflexi	Chloroflexia	Chloroflexales	Chloroflexaceae	Chloronema	ASV_ 13280	25	0	0	0	0	0	0	0	0	0	0	0	0.000117136	0	0	0	0	0	0	0	0	0	0	0	9.76134e-06	1	0	0	0	0	0	0	0	0	0	0	0	1	0	0	0	0
1160	Bacteria	Proteobacteria	Gammaproteobacteria	Methylococcales	Methylomonadaceae	NA	ASV_ 13281	25	0	0	0	0	0	0	0	0	0	0	0	0.000117136	0	0	0	0	0	0	0	0	0	0	0	9.76134e-06	1	0	0	0	0	0	0	0	0	0	0	0	1	0	0	0	0
1161	Bacteria	Acidobacteriota	Subgroup 21	NA	NA	NA	ASV_ 13282	25	0	0	0	0	0	0	0	0	0	0	0	0.000117136	0	0	0	0	0	0	0	0	0	0	0	9.76134e-06	1	0	0	0	0	0	0	0	0	0	0	0	1	0	0	0	0
1162	Bacteria	Proteobacteria	Gammaproteobacteria	Pseudomonadales	Cellvibrionaceae	NA	ASV_ 13287	0	25	0	0	0	0	0	0	0	0	0	0	0	0.000143083	0	0	0	0	0	0	0	0	0	0	1.19236e-05	0	1	0	0	0	0	0	0	0	0	0	0	1	0	0	0	0
1163	Bacteria	Firmicutes	Clostridia	Gracilibacteraceae	NA	NA	ASV_ 13288	0	25	0	0	0	0	0	0	0	0	0	0	0	0.000143083	0	0	0	0	0	0	0	0	0	0	1.19236e-05	0	1	0	0	0	0	0	0	0	0	0	0	1	0	0	0	0
1164	Bacteria	Firmicutes	Clostridia	Oscillospirales	Hungateiclostridiaceae	Ruminiclostridium	ASV_ 13523	24	0	0	0	0	0	0	0	0	0	0	0	0.000112451	0	0	0	0	0	0	0	0	0	0	0	9.37089e-06	1	0	0	0	0	0	0	0	0	0	0	0	1	0	0	0	0
1165	Bacteria	NA	NA	NA	NA	NA	ASV_ 1367	55	14	0	0	0	0	118	127	200	189	172	113	0.000257699	8.01264e-05	0	0	0	0	0.000379297	0.000346634	0.000635805	0.000632107	0.000467621	0.000303292	0.000258548	1	0	0	0	0	0	1	1	1	1	1	1	1	0	0	0	0
1166	Bacteria	Planctomycetota	OM190	NA	NA	NA	ASV_ 13754	23	0	0	0	0	0	0	0	0	0	0	0	0.000107765	0	0	0	0	0	0	0	0	0	0	0	8.98043e-06	1	0	0	0	0	0	0	0	0	0	0	0	1	0	0	0	0
1167	Bacteria	Planctomycetota	Planctomycetes	Planctomycetales	Rubinisphaeraceae	SH-PL14	ASV_ 13755	23	0	0	0	0	0	0	0	0	0	0	0	0.000107765	0	0	0	0	0	0	0	0	0	0	0	8.98043e-06	1	0	0	0	0	0	0	0	0	0	0	0	1	0	0	0	0
1168	Bacteria	Planctomycetota	BD7-11	NA	NA	NA	ASV_ 14002	22	0	0	0	0	0	0	0	0	0	0	0	0.00010308	0	0	0	0	0	0	0	0	0	0	0	8.58998e-06	1	0	0	0	0	0	0	0	0	0	0	0	1	0	0	0	0
1169	Bacteria	Chloroflexi	Anaerolineae	Ardenticatenales	Ardenticatenaceae	NA	ASV_ 14003	22	0	0	0	0	0	0	0	0	0	0	0	0.00010308	0	0	0	0	0	0	0	0	0	0	0	8.58998e-06	1	0	0	0	0	0	0	0	0	0	0	0	1	0	0	0	0
1170	Bacteria	Bdellovibrionota	Bdellovibrionia	Bdellovibrionales	Bdellovibrionaceae	OM27 clade	ASV_ 1410	31	13	0	0	116	68	0	0	0	0	150	88	0.000145249	7.44031e-05	0	0	0.00045505	0.000265594	0	0	0	0	0.000407809	0.000236192	0.000132025	1	0	0	0	1	1	0	0	0	0	1	1	1	0	0	0	0
1171	Bacteria	NB1-j	NA	NA	NA	NA	ASV_ 1432	36	0	24	13	0	0	206	166	0	0	49	0	0.000168676	0	7.66359e-05	5.05007e-05	0	0	0.000662162	0.00045308	0	0	0.000133218	0	0.000128689	1	0	0	0	0	0	1	1	0	0	1	0	1	0	0	0	0
1172	Bacteria	Chloroflexi	Anaerolineae	Anaerolineales	Anaerolineaceae	NA	ASV_ 1439	0	0	32	20	0	0	0	0	0	0	0	0	0	0	0.000102181	7.76934e-05	0	0	0	0	0	0	0	0	1.49896e-05	0	0	1	0	0	0	0	0	0	0	0	0	1	0	0	0	0
1173	Bacteria	Cyanobacteria	Cyanobacteria	Cyanobacteriales	Phormidiaceae	NA	ASV_ 1486	0	263	0	0	0	0	0	0	0	0	0	0	0	0.00150523	0	0	0	0	0	0	0	0	0	0	0.000125436	0	1	0	0	0	0	0	0	0	0	0	0	1	0	0	0	0
1174	Bacteria	Bdellovibrionota	Bdellovibrionia	Bacteriovoracales	Bacteriovoracaceae	NA	ASV_ 14892	0	19	0	0	0	0	0	0	0	0	0	0	0	0.000108743	0	0	0	0	0	0	0	0	0	0	9.06191e-06	0	1	0	0	0	0	0	0	0	0	0	0	1	0	0	0	0
1175	Bacteria	Bdellovibrionota	Bdellovibrionia	Bacteriovoracales	Bacteriovoracaceae	Peredibacter	ASV_ 15261	0	18	0	0	0	0	0	0	0	0	0	0	0	0.00010302	0	0	0	0	0	0	0	0	0	0	8.58497e-06	0	1	0	0	0	0	0	0	0	0	0	0	1	0	0	0	0
1176	Bacteria	Chloroflexi	Anaerolineae	ADurb.Bin180	NA	NA	ASV_ 1540	0	0	27	26	0	0	0	0	0	0	0	0	0	0	8.62154e-05	0.000101001	0	0	0	0	0	0	0	0	1.56014e-05	0	0	0	1	0	0	0	0	0	0	0	0	1	0	0	0	0
1177	Bacteria	Chloroflexi	Anaerolineae	ADurb.Bin180	NA	NA	ASV_ 1562	0	0	57	25	0	0	40	0	0	0	18	22	0	0	0.00018201	9.71168e-05	0	0	0.000128575	0	0	0	4.89371e-05	5.9048e-05	4.2974e-05	0	0	1	0	0	0	1	0	0	0	0	0	1	0	0	0	0
1178	Bacteria	Proteobacteria	Gammaproteobacteria	NA	NA	NA	ASV_ 1580	11	21	16	16	81	70	0	0	6	12	23	9	5.15399e-05	0.00012019	5.10906e-05	6.21547e-05	0.00031775	0.000273405	0	0	1.90741e-05	4.01338e-05	6.25308e-05	2.4156e-05	8.51688e-05	0	1	0	0	1	1	0	0	0	0	0	0	1	0	0	0	0
1179	Bacteria	Myxococcota	Polyangia	Haliangiales	Haliangiaceae	Haliangium	ASV_ 1657	14	506	0	0	0	0	0	0	0	0	38	0	6.55962e-05	0.002896	0	0	0	0	0	0	0	0	0.000103312	0	0.000255409	0	1	0	0	0	0	0	0	0	0	1	0	1	0	0	0	0
1180	Bacteria	Chloroflexi	Anaerolineae	MSB-5B2	NA	NA	ASV_ 1665	0	0	34	25	0	0	0	0	0	0	0	0	0	0	0.000108568	9.71168e-05	0	0	0	0	0	0	0	0	1.71404e-05	0	0	1	0	0	0	0	0	0	0	0	0	1	0	0	0	0
1181	Archaea	Crenarchaeota	Bathyarchaeia	NA	NA	NA	ASV_ 1677	0	13	0	28	25	10	21	45	93	93	49	64	0	7.44031e-05	0	0.000108771	9.80711e-05	3.90579e-05	6.7502e-05	0.000122823	0.000295649	0.000311037	0.000133218	0.000171776	0.000118526	0	0	0	1	0	0	0	1	1	1	1	1	1	0	0	0	0
1182	Bacteria	Proteobacteria	Gammaproteobacteria	Methylococcales	Methylohalobiaceae	NA	ASV_ 1702	37	0	0	0	44	0	3	0	48	19	92	88	0.000173361	0	0	0	0.000172605	0	9.64314e-06	0	0.000152593	6.35452e-05	0.000250123	0.000236192	8.81719e-05	1	0	0	0	1	0	0	0	1	0	1	1	1	0	0	0	0
1183	Bacteria	Chloroflexi	Anaerolineae	ADurb.Bin180	NA	NA	ASV_ 1706	29	12	17	20	21	15	36	61	154	107	117	82	0.000135878	6.86797e-05	5.42838e-05	7.76934e-05	8.23798e-05	5.85869e-05	0.000115718	0.000166493	0.00048957	0.00035786	0.000318091	0.000220088	0.000178777	1	0	0	0	0	0	1	1	1	1	1	1	1	0	0	0	0
1184	Bacteria	Proteobacteria	Alphaproteobacteria	Acetobacterales	Acetobacteraceae	Roseomonas	ASV_ 171	48	14	10	6	893	124	0	0	48	77	106	57	0.000224901	8.01264e-05	3.19316e-05	2.3308e-05	0.0035031	0.000484318	0	0	0.000152593	0.000257525	0.000288185	0.000152988	0.000433248	1	0	0	0	1	1	0	0	1	1	1	1	1	0	0	0	0
1185	Archaea	Crenarchaeota	Bathyarchaeia	NA	NA	NA	ASV_ 1718	0	77	0	0	0	0	0	0	0	0	0	0	0	0.000440695	0	0	0	0	0	0	0	0	0	0	3.67246e-05	0	1	0	0	0	0	0	0	0	0	0	0	1	0	0	0	0
1186	Bacteria	Chloroflexi	Anaerolineae	SBR1031	NA	NA	ASV_ 174	0	0	101	0	0	0	0	0	0	0	0	0	0	0	0.00032251	0	0	0	0	0	0	0	0	0	2.68758e-05	0	0	1	0	0	0	0	0	0	0	0	0	1	0	0	0	0
1187	Bacteria	Desulfobacterota	Desulfobaccia	Desulfobaccales	Desulfobaccaceae	Desulfobacca	ASV_ 1777	30	13	19	21	62	19	0	0	55	74	100	59	0.000140563	7.44031e-05	6.06701e-05	8.15781e-05	0.000243216	7.42101e-05	0	0	0.000174846	0.000247492	0.000271873	0.000158356	0.000127267	1	0	0	0	1	0	0	0	1	1	1	1	1	0	0	0	0
1188	Bacteria	Chloroflexi	Anaerolineae	MSB-5E12	NA	NA	ASV_ 1778	13	0	34	22	0	0	57	89	67	53	55	85	6.09108e-05	0	0.000108568	8.54628e-05	0	0	0.00018322	0.000242917	0.000212995	0.000177258	0.00014953	0.00022814	0.00012075	0	0	1	0	0	0	1	1	1	1	1	1	1	0	0	0	0
1189	Bacteria	Proteobacteria	Gammaproteobacteria	Xanthomonadales	Xanthomonadaceae	Rehaibacterium	ASV_ 180	16	26	0	0	0	0	3155	3542	71	39	811	543	7.49671e-05	0.000148806	0	0	0	0	0.0101414	0.00966753	0.000225711	0.000130435	0.00220489	0.00145741	0.00200426	0	1	0	0	0	0	1	1	1	1	1	1	1	0	0	0	0
1190	Bacteria	Chloroflexi	Anaerolineae	Caldilineales	Caldilineaceae	NA	ASV_ 1839	28	0	0	0	0	0	201	173	15	39	90	66	0.000131192	0	0	0	0	0	0.00064609	0.000472186	4.76854e-05	0.000130435	0.000244686	0.000177144	0.000154118	1	0	0	0	0	0	1	1	0	1	1	1	1	0	0	0	0
1191	Bacteria	Chloroflexi	Anaerolineae	SBR1031	A4b	NA	ASV_ 1853	28	0	0	0	0	0	89	88	0	0	20	16	0.000131192	0	0	0	0	0	0.00028608	0.000240187	0	0	5.43746e-05	4.2944e-05	6.28982e-05	1	0	0	0	0	0	1	1	0	0	0	0	1	0	0	0	0
1192	Bacteria	Nitrospirota	Thermodesulfovibrionia	NA	NA	NA	ASV_ 1862	0	0	33	0	0	0	0	0	0	0	0	0	0	0	0.000105374	0	0	0	0	0	0	0	0	0	8.7812e-06	0	0	1	0	0	0	0	0	0	0	0	0	1	0	0	0	0
1193	Bacteria	Armatimonadota	Chthonomonadetes	Chthonomonadales	NA	NA	ASV_ 1874	0	0	20	33	0	0	0	0	68	83	21	23	0	0	6.38633e-05	0.000128194	0	0	0	0	0.000216174	0.000277592	5.70933e-05	6.1732e-05	6.7054e-05	0	0	0	1	0	0	0	0	1	1	0	0	1	0	0	0	0
1194	Bacteria	Sva0485	NA	NA	NA	NA	ASV_ 1878	0	0	31	28	0	0	0	0	0	0	5	0	0	0	9.89881e-05	0.000108771	0	0	0	0	0	0	1.35936e-05	0	1.8446e-05	0	0	0	1	0	0	0	0	0	0	0	0	1	0	0	0	0
1195	Bacteria	Chloroflexi	Anaerolineae	Anaerolineales	Anaerolineaceae	NA	ASV_ 1905	0	0	44	0	0	0	0	24	0	0	0	0	0	0	0.000140499	0	0	0	0	6.55056e-05	0	0	0	0	1.71671e-05	0	0	1	0	0	0	0	0	0	0	0	0	1	0	0	0	0
1196	Archaea	Crenarchaeota	Bathyarchaeia	NA	NA	NA	ASV_ 1913	0	64	0	0	0	81	0	0	104	110	106	116	0	0.000366292	0	0	0	0.000316369	0	0	0.000330618	0.000367893	0.000288185	0.000311344	0.000165059	0	1	0	0	0	1	0	0	1	1	1	1	1	0	0	0	0
1197	Archaea	Crenarchaeota	Bathyarchaeia	NA	NA	NA	ASV_ 1946	0	29	0	0	62	88	0	0	0	26	21	0	0	0.000165976	0	0	0.000243216	0.00034371	0	0	0	8.69565e-05	5.70933e-05	0	7.4746e-05	0	1	0	0	1	1	0	0	0	0	0	0	1	0	0	0	0
1198	Archaea	Nanoarchaeota	Nanoarchaeia	Woesearchaeales	NA	NA	ASV_ 1960	15	19	0	0	0	0	0	0	0	0	108	177	7.02816e-05	0.000108743	0	0	0	0	0	0	0	0	0.000293623	0.000475068	7.89763e-05	0	1	0	0	0	0	0	0	0	0	1	1	1	0	0	0	0
1199	Bacteria	Chloroflexi	Dehalococcoidia	GIF9	NA	NA	ASV_ 1982	22	16	0	0	11	8	36	70	142	123	57	97	0.00010308	9.1573e-05	0	0	4.31513e-05	3.12463e-05	0.000115718	0.000191058	0.000451421	0.000411371	0.000154968	0.000260348	0.000154495	1	0	0	0	0	0	1	1	1	1	1	1	1	0	0	0	0
1200	Bacteria	Acidobacteriota	Aminicenantia	Aminicenantales	NA	NA	ASV_ 1985	35	17	12	0	23	13	0	0	13	41	12	18	0.00016399	9.72963e-05	3.8318e-05	0	9.02254e-05	5.07753e-05	0	0	4.13273e-05	0.000137124	3.26247e-05	4.8312e-05	5.83328e-05	1	0	0	0	0	0	0	0	0	1	0	0	1	0	0	0	0
1201	Bacteria	NA	NA	NA	NA	NA	ASV_ 1997	0	0	24	33	0	0	0	0	0	0	24	48	0	0	7.66359e-05	0.000128194	0	0	0	0	0	0	6.52495e-05	0.000128832	3.32426e-05	0	0	0	1	0	0	0	0	0	0	0	1	1	0	0	0	0
1202	Bacteria	Proteobacteria	Alphaproteobacteria	Rhodobacterales	Rhodobacteraceae	Oceanicella	ASV_ 2005	23	0	0	0	0	0	0	0	0	0	31	0	0.000107765	0	0	0	0	0	0	0	0	0	8.42806e-05	0	1.60038e-05	1	0	0	0	0	0	0	0	0	0	0	0	1	0	0	0	0
1203	Bacteria	Acetothermia	Acetothermiia	NA	NA	NA	ASV_ 201	0	27	19	14	0	0	10	6	0	12	100	179	0	0.000154529	6.06701e-05	5.43854e-05	0	0	3.21438e-05	1.63764e-05	0	4.01338e-05	0.000271873	0.000480436	9.25457e-05	0	1	0	0	0	0	0	0	0	0	1	1	1	0	0	0	0
1204	Archaea	Crenarchaeota	Bathyarchaeia	NA	NA	NA	ASV_ 2035	0	0	0	31	0	0	0	0	0	0	0	0	0	0	0	0.000120425	0	0	0	0	0	0	0	0	1.00354e-05	0	0	0	1	0	0	0	0	0	0	0	0	1	0	0	0	0
1205	Archaea	Crenarchaeota	Bathyarchaeia	NA	NA	NA	ASV_ 2051	0	20	0	0	0	0	83	150	49	70	32	35	0	0.000114466	0	0	0	0	0.000266794	0.00040941	0.000155772	0.000234114	8.69993e-05	9.39401e-05	0.000113458	0	1	0	0	0	0	1	1	1	1	0	0	1	0	0	0	0
1206	Archaea	Crenarchaeota	Bathyarchaeia	NA	NA	NA	ASV_ 2099	0	53	29	0	34	0	0	0	0	0	0	0	0	0.000303336	9.26018e-05	0	0.000133377	0	0	0	0	0	0	0	4.41095e-05	0	1	0	0	1	0	0	0	0	0	0	0	1	0	0	0	0
1207	Bacteria	Bacteroidota	Kryptonia	Kryptoniales	BSV26	NA	ASV_ 2115	13	19	22	14	0	0	53	53	64	55	0	12	6.09108e-05	0.000108743	7.02496e-05	5.43854e-05	0	0	0.000170362	0.000144658	0.000203458	0.000183946	0	3.2208e-05	8.57434e-05	0	1	0	0	0	0	1	1	1	1	0	0	1	0	0	0	0
1208	Bacteria	Armatimonadota	Fimbriimonadia	Fimbriimonadales	Fimbriimonadaceae	NA	ASV_ 2124	43	16	0	0	0	0	0	0	0	0	13	0	0.000201474	9.1573e-05	0	0	0	0	0	0	0	0	3.53435e-05	0	2.73659e-05	1	0	0	0	0	0	0	0	0	0	0	0	1	0	0	0	0
1209	Archaea	Crenarchaeota	Bathyarchaeia	NA	NA	NA	ASV_ 2195	23	11	0	0	0	0	10	45	66	52	37	36	0.000107765	6.29564e-05	0	0	0	0	3.21438e-05	0.000122823	0.000209816	0.000173913	0.000100593	9.66241e-05	7.55528e-05	1	0	0	0	0	0	0	1	1	1	1	0	1	0	0	0	0
1210	Bacteria	Proteobacteria	Gammaproteobacteria	Methylococcales	Methylococcaceae	NA	ASV_ 221	13	23	0	0	0	0	638	772	56	75	190	190	6.09108e-05	0.000131636	0	0	0	0	0.00205077	0.0021071	0.000178025	0.000250836	0.000516558	0.00050996	0.000483816	0	1	0	0	0	0	1	1	1	1	1	1	1	0	0	0	0
1211	Bacteria	Proteobacteria	Alphaproteobacteria	Rhodobacterales	Rhodobacteraceae	Limibaculum	ASV_ 2222	46	0	25	19	0	0	17	18	0	0	44	27	0.00021553	0	7.98291e-05	7.38088e-05	0	0	5.46445e-05	4.91292e-05	0	0	0.000119624	7.2468e-05	5.54195e-05	1	0	0	0	0	0	0	0	0	0	1	0	1	0	0	0	0
1212	Bacteria	Chloroflexi	Anaerolineae	Anaerolineales	Anaerolineaceae	NA	ASV_ 2239	23	0	13	0	0	0	18	0	62	58	52	46	0.000107765	0	4.15111e-05	0	0	0	5.78588e-05	0	0.000197099	0.00019398	0.000141374	0.000123464	7.1921e-05	1	0	0	0	0	0	0	0	1	1	1	1	1	0	0	0	0
1213	Archaea	Crenarchaeota	Bathyarchaeia	NA	NA	NA	ASV_ 2290	0	0	15	30	0	0	0	0	0	0	0	0	0	0	4.78975e-05	0.00011654	0	0	0	0	0	0	0	0	1.37031e-05	0	0	0	1	0	0	0	0	0	0	0	0	1	0	0	0	0
1214	Archaea	Crenarchaeota	Bathyarchaeia	NA	NA	NA	ASV_ 2346	56	0	0	0	0	0	0	42	68	104	97	131	0.000262385	0	0	0	0	0	0	0.000114635	0.000216174	0.000347826	0.000263717	0.000351604	0.000129695	1	0	0	0	0	0	0	1	1	1	1	1	1	0	0	0	0
1215	Bacteria	Planctomycetota	OM190	NA	NA	NA	ASV_ 2350	36	16	0	0	91	0	0	0	0	0	0	0	0.000168676	9.1573e-05	0	0	0.000356979	0	0	0	0	0	0	0	5.14357e-05	1	0	0	0	1	0	0	0	0	0	0	0	1	0	0	0	0
1216	Archaea	Crenarchaeota	Bathyarchaeia	NA	NA	NA	ASV_ 2369	30	0	0	0	0	0	58	0	0	0	25	0	0.000140563	0	0	0	0	0	0.000186434	0	0	0	6.79682e-05	0	3.29138e-05	1	0	0	0	0	0	1	0	0	0	0	0	1	0	0	0	0
1217	Bacteria	GAL15	NA	NA	NA	NA	ASV_ 2382	26	10	0	3	0	0	155	204	5	0	25	0	0.000121822	5.72331e-05	0	1.1654e-05	0	0	0.000498229	0.000556797	1.58951e-05	0	6.79682e-05	0	0.0001108	1	0	0	0	0	0	1	1	0	0	0	0	1	0	0	0	0
1218	Bacteria	Desulfobacterota	Desulfobaccia	Desulfobaccales	Desulfobaccaceae	Desulfobacca	ASV_ 2472	0	16	37	0	0	0	0	0	104	64	129	99	0	9.1573e-05	0.000118147	0	0	0	0	0	0.000330618	0.000214047	0.000350716	0.000265716	0.000114235	0	0	1	0	0	0	0	0	1	1	1	1	1	0	0	0	0
1219	Bacteria	Desulfobacterota	Desulfobacteria	Desulfobacterales	NA	NA	ASV_ 2480	0	0	52	23	0	5	18	10	0	0	30	34	0	0	0.000166045	8.93475e-05	0	1.9529e-05	5.78588e-05	2.7294e-05	0	0	8.15619e-05	9.12561e-05	4.44076e-05	0	0	1	0	0	0	0	0	0	0	0	0	1	0	0	0	0
1220	Bacteria	Proteobacteria	Alphaproteobacteria	Parvibaculales	Parvibaculaceae	Parvibaculum	ASV_ 2529	34	0	0	0	0	0	0	0	0	0	19	12	0.000159305	0	0	0	0	0	0	0	0	0	5.16558e-05	3.2208e-05	2.02641e-05	1	0	0	0	0	0	0	0	0	0	0	0	1	0	0	0	0
1221	Bacteria	Deinococcota	Deinococci	Thermales	Thermaceae	Thermus	ASV_ 2551	0	0	0	44	0	0	0	0	0	0	0	0	0	0	0	0.000170926	0	0	0	0	0	0	0	0	1.42438e-05	0	0	0	1	0	0	0	0	0	0	0	0	1	0	0	0	0
1222	Bacteria	Chloroflexi	Anaerolineae	Caldilineales	Caldilineaceae	NA	ASV_ 2629	0	0	62	0	0	0	0	0	0	0	0	0	0	0	0.000197976	0	0	0	0	0	0	0	0	0	1.6498e-05	0	0	1	0	0	0	0	0	0	0	0	0	1	0	0	0	0
1223	Archaea	Crenarchaeota	Bathyarchaeia	NA	NA	NA	ASV_ 2636	0	0	55	0	0	0	0	0	0	0	0	0	0	0	0.000175624	0	0	0	0	0	0	0	0	0	1.46353e-05	0	0	1	0	0	0	0	0	0	0	0	0	1	0	0	0	0
1224	Bacteria	Desulfobacterota	Desulfuromonadia	Bradymonadales	NA	NA	ASV_ 2647	21	28	0	0	0	0	0	0	0	0	205	148	9.83943e-05	0.000160253	0	0	0	0	0	0	0	0	0.000557339	0.000397232	0.000101102	0	1	0	0	0	0	0	0	0	0	1	1	1	0	0	0	0
1225	Bacteria	Acidobacteriota	Thermoanaerobaculia	Thermoanaerobaculales	Thermoanaerobaculaceae	Thermoanaerobaculum	ASV_ 2656	32	17	23	14	0	0	0	0	10	0	104	66	0.000149934	9.72963e-05	7.34428e-05	5.43854e-05	0	0	0	0	3.17902e-05	0	0.000282748	0.000177144	7.22284e-05	1	0	0	0	0	0	0	0	0	0	1	1	1	0	0	0	0
1226	Bacteria	Chloroflexi	Anaerolineae	ADurb.Bin180	NA	NA	ASV_ 2658	0	0	30	29	0	0	0	0	0	0	0	0	0	0	9.57949e-05	0.000112655	0	0	0	0	0	0	0	0	1.73709e-05	0	0	0	1	0	0	0	0	0	0	0	0	1	0	0	0	0
1227	Bacteria	Proteobacteria	Alphaproteobacteria	Rhizobiales	Hyphomicrobiaceae	Hyphomicrobium	ASV_ 2666	55	0	0	0	0	0	0	0	0	0	253	110	0.000257699	0	0	0	0	0	0	0	0	0	0.000687838	0.00029524	0.000103398	1	0	0	0	0	0	0	0	0	0	1	1	1	0	0	0	0
1228	Bacteria	Myxococcota	Polyangia	Polyangiales	Sandaracinaceae	Sandaracinus	ASV_ 2684	0	42	0	0	21	30	0	0	0	0	64	48	0	0.000240379	0	0	8.23798e-05	0.000117174	0	0	0	0	0.000173999	0.000128832	6.18969e-05	0	1	0	0	0	1	0	0	0	0	1	1	1	0	0	0	0
1229	Bacteria	Chloroflexi	JG30-KF-CM66	NA	NA	NA	ASV_ 2720	25	10	0	0	0	0	12	0	32	26	52	34	0.000117136	5.72331e-05	0	0	0	0	3.85726e-05	0	0.000101729	8.69565e-05	0.000141374	9.12561e-05	5.28547e-05	1	0	0	0	0	0	0	0	1	0	1	0	1	0	0	0	0
1230	Bacteria	Hydrogenedentes	Hydrogenedentia	Hydrogenedentiales	Hydrogenedensaceae	NA	ASV_ 2762	18	26	0	0	0	0	44	29	8	20	28	28	8.4338e-05	0.000148806	0	0	0	0	0.000141433	7.91526e-05	2.54322e-05	6.68896e-05	7.61244e-05	7.5152e-05	5.81106e-05	0	1	0	0	0	0	1	0	0	0	0	0	1	0	0	0	0
1231	Bacteria	Firmicutes	Clostridia	Lachnospirales	Lachnospiraceae	NA	ASV_ 2779	0	0	24	27	0	0	0	0	0	0	49	78	0	0	7.66359e-05	0.000104886	0	0	0	0	0	0	0.000133218	0.000209352	4.36743e-05	0	0	0	1	0	0	0	0	0	0	1	1	1	0	0	0	0
1232	Bacteria	Planctomycetota	Brocadiae	Brocadiales	Brocadiaceae	Candidatus Kuenenia	ASV_ 2809	18	26	0	0	0	0	41	62	0	0	0	18	8.4338e-05	0.000148806	0	0	0	0	0.00013179	0.000169223	0	0	0	4.8312e-05	4.8539e-05	0	1	0	0	0	0	1	1	0	0	0	0	1	0	0	0	0
1233	Bacteria	Chloroflexi	Anaerolineae	SBR1031	NA	NA	ASV_ 2818	0	117	0	0	0	0	0	0	0	0	0	0	0	0.000669628	0	0	0	0	0	0	0	0	0	0	5.58023e-05	0	1	0	0	0	0	0	0	0	0	0	0	1	0	0	0	0
1234	Archaea	Crenarchaeota	Bathyarchaeia	NA	NA	NA	ASV_ 2826	0	0	50	23	0	0	0	0	0	0	0	0	0	0	0.000159658	8.93475e-05	0	0	0	0	0	0	0	0	2.07505e-05	0	0	1	0	0	0	0	0	0	0	0	0	1	0	0	0	0
1235	Bacteria	Desulfobacterota	Syntrophobacteria	Syntrophobacterales	Syntrophobacteraceae	Desulfosoma	ASV_ 2921	0	0	0	198	0	168	0	0	0	0	0	0	0	0	0	0.000769165	0	0.000656173	0	0	0	0	0	0	0.000118778	0	0	0	1	0	1	0	0	0	0	0	0	1	0	0	0	0
1236	Bacteria	Proteobacteria	Gammaproteobacteria	Burkholderiales	Sutterellaceae	NA	ASV_ 2938	58	0	0	0	0	0	0	0	0	0	0	0	0.000271756	0	0	0	0	0	0	0	0	0	0	0	2.26463e-05	1	0	0	0	0	0	0	0	0	0	0	0	1	0	0	0	0
1237	Bacteria	Chloroflexi	Anaerolineae	NA	NA	NA	ASV_ 2958	7	0	20	33	18	6	0	0	0	0	0	0	3.27981e-05	0	6.38633e-05	0.000128194	7.06112e-05	2.34348e-05	0	0	0	0	0	0	2.65751e-05	0	0	0	1	0	0	0	0	0	0	0	0	1	0	0	0	0
1238	Archaea	Halobacterota	NA	NA	NA	NA	ASV_ 2981	63	17	0	0	12	0	23	0	53	72	59	57	0.000295183	9.72963e-05	0	0	4.70741e-05	0	7.39307e-05	0	0.000168488	0.000240803	0.000160405	0.000152988	0.000103014	1	0	0	0	0	0	0	0	1	1	1	1	1	0	0	0	0
1239	Bacteria	Proteobacteria	Alphaproteobacteria	Rhodobacterales	Rhodobacteraceae	Tabrizicola	ASV_ 299	31	0	0	0	175	0	0	0	0	0	113	48	0.000145249	0	0	0	0.000686498	0	0	0	0	0	0.000307216	0.000128832	0.00010565	1	0	0	0	1	0	0	0	0	0	1	1	1	0	0	0	0
1240	Bacteria	Chloroflexi	Dehalococcoidia	GIF9	NA	NA	ASV_ 2993	0	0	50	0	0	0	0	19	79	65	0	49	0	0	0.000159658	0	0	0	0	5.18586e-05	0.000251143	0.000217391	0	0.000131516	6.76306e-05	0	0	1	0	0	0	0	0	1	1	0	1	1	0	0	0	0
1241	Archaea	Crenarchaeota	Bathyarchaeia	NA	NA	NA	ASV_ 3038	28	13	20	13	42	26	14	22	38	52	33	45	0.000131192	7.44031e-05	6.38633e-05	5.05007e-05	0.00016476	0.000101551	4.50013e-05	6.00468e-05	0.000120803	0.000173913	8.9718e-05	0.00012078	9.9711e-05	1	0	0	0	1	1	0	0	1	1	0	1	1	0	0	0	0
1242	Bacteria	Actinobacteriota	Acidimicrobiia	IMCC26256	NA	NA	ASV_ 3041	40	14	0	0	0	0	80	46	21	21	45	19	0.000187418	8.01264e-05	0	0	0	0	0.00025715	0.000125552	6.67595e-05	7.02341e-05	0.000122343	5.0996e-05	8.00483e-05	1	0	0	0	0	0	1	1	0	0	1	0	1	0	0	0	0
1243	Bacteria	Proteobacteria	Gammaproteobacteria	Halothiobacillales	Halothiobacillaceae	Thiofaba	ASV_ 3053	25	0	0	0	96	0	0	0	53	59	0	26	0.000117136	0	0	0	0.000376593	0	0	0	0.000168488	0.000197324	0	6.9784e-05	7.74438e-05	1	0	0	0	1	0	0	0	1	1	0	0	1	0	0	0	0
1244	Archaea	Crenarchaeota	Bathyarchaeia	NA	NA	NA	ASV_ 3071	0	15	51	15	0	0	13	15	15	0	0	0	0	8.58497e-05	0.000162851	5.82701e-05	0	0	4.17869e-05	4.0941e-05	4.76854e-05	0	0	0	3.64487e-05	0	0	1	0	0	0	0	0	0	0	0	0	1	0	0	0	0
1245	Bacteria	Proteobacteria	Alphaproteobacteria	NA	NA	NA	ASV_ 3088	9	20	0	0	0	0	0	0	0	0	0	0	4.2169e-05	0.000114466	0	0	0	0	0	0	0	0	0	0	1.30529e-05	0	1	0	0	0	0	0	0	0	0	0	0	1	0	0	0	0
1246	Bacteria	Proteobacteria	Alphaproteobacteria	Rhodospirillales	NA	NA	ASV_ 3110	12	26	0	0	0	0	0	0	0	0	0	0	5.62253e-05	0.000148806	0	0	0	0	0	0	0	0	0	0	1.7086e-05	0	1	0	0	0	0	0	0	0	0	0	0	1	0	0	0	0
1247	Bacteria	Desulfobacterota	Desulfovibrionia	Desulfovibrionales	Desulfovibrionaceae	Desulfovibrio	ASV_ 3140	14	21	0	0	0	0	0	0	0	0	0	0	6.55962e-05	0.00012019	0	0	0	0	0	0	0	0	0	0	1.54821e-05	0	1	0	0	0	0	0	0	0	0	0	0	1	0	0	0	0
1248	Bacteria	Sva0485	NA	NA	NA	NA	ASV_ 3175	0	0	38	0	0	0	0	0	0	0	0	0	0	0	0.00012134	0	0	0	0	0	0	0	0	0	1.01117e-05	0	0	1	0	0	0	0	0	0	0	0	0	1	0	0	0	0
1249	Bacteria	Chloroflexi	Anaerolineae	Anaerolineales	Anaerolineaceae	NA	ASV_ 3199	0	0	321	0	0	0	0	0	0	0	0	0	0	0	0.00102501	0	0	0	0	0	0	0	0	0	8.54171e-05	0	0	1	0	0	0	0	0	0	0	0	0	1	0	0	0	0
1250	Archaea	Crenarchaeota	Bathyarchaeia	NA	NA	NA	ASV_ 3229	0	0	27	30	0	0	0	0	0	0	0	0	0	0	8.62154e-05	0.00011654	0	0	0	0	0	0	0	0	1.68963e-05	0	0	0	1	0	0	0	0	0	0	0	0	1	0	0	0	0
1251	Bacteria	Desulfobacterota	Desulfobacteria	Desulfatiglandales	Desulfatiglandaceae	Desulfatiglans	ASV_ 324	0	0	59	0	0	0	0	0	0	0	0	0	0	0	0.000188397	0	0	0	0	0	0	0	0	0	1.56997e-05	0	0	1	0	0	0	0	0	0	0	0	0	1	0	0	0	0
1252	Archaea	Crenarchaeota	Bathyarchaeia	NA	NA	NA	ASV_ 3253	0	0	10	30	0	0	0	0	0	0	0	0	0	0	3.19316e-05	0.00011654	0	0	0	0	0	0	0	0	1.23726e-05	0	0	0	1	0	0	0	0	0	0	0	0	1	0	0	0	0
1253	Archaea	Crenarchaeota	Bathyarchaeia	NA	NA	NA	ASV_ 3257	29	14	0	0	0	0	0	29	55	70	39	64	0.000135878	8.01264e-05	0	0	0	0	0	7.91526e-05	0.000174846	0.000234114	0.00010603	0.000171776	8.18269e-05	1	0	0	0	0	0	0	0	1	1	1	1	1	0	0	0	0
1254	Archaea	Crenarchaeota	Bathyarchaeia	NA	NA	NA	ASV_ 3267	0	0	0	33	0	0	0	0	0	0	0	0	0	0	0	0.000128194	0	0	0	0	0	0	0	0	1.06828e-05	0	0	0	1	0	0	0	0	0	0	0	0	1	0	0	0	0
1255	Bacteria	Sva0485	NA	NA	NA	NA	ASV_ 327	39	0	0	0	0	0	43	104	150	229	167	137	0.000182732	0	0	0	0	0	0.000138218	0.000283858	0.000476854	0.000765886	0.000454028	0.000367708	0.00022244	1	0	0	0	0	0	1	1	1	1	1	1	1	0	0	0	0
1256	Bacteria	Proteobacteria	Gammaproteobacteria	Burkholderiales	Sutterellaceae	NA	ASV_ 329	55	0	0	0	0	15	808	542	128	152	673	513	0.000257699	0	0	0	0	5.85869e-05	0.00259722	0.00147933	0.000406915	0.000508361	0.0018297	0.00137689	0.000709559	1	0	0	0	0	0	1	1	1	1	1	1	1	0	0	0	0
1257	Bacteria	Planctomycetota	Phycisphaerae	Phycisphaerales	AKAU3564 sediment group	NA	ASV_ 3323	0	0	57	0	0	0	0	0	0	0	0	0	0	0	0.00018201	0	0	0	0	0	0	0	0	0	1.51675e-05	0	0	1	0	0	0	0	0	0	0	0	0	1	0	0	0	0
1258	Archaea	Crenarchaeota	Bathyarchaeia	NA	NA	NA	ASV_ 3335	0	0	53	0	0	0	0	0	0	0	0	0	0	0	0.000169238	0	0	0	0	0	0	0	0	0	1.41031e-05	0	0	1	0	0	0	0	0	0	0	0	0	1	0	0	0	0
1259	Bacteria	Proteobacteria	Gammaproteobacteria	Burkholderiales	Hydrogenophilaceae	Thiobacillus	ASV_ 334	0	0	42	22	0	0	143	139	0	0	41	29	0	0	0.000134113	8.54628e-05	0	0	0.000459656	0.000379386	0	0	0.000111468	7.78361e-05	0.000103994	0	0	1	0	0	0	1	1	0	0	1	0	1	0	0	0	0
1260	Archaea	Crenarchaeota	Bathyarchaeia	NA	NA	NA	ASV_ 3363	0	0	51	0	0	0	0	0	0	0	0	0	0	0	0.000162851	0	0	0	0	0	0	0	0	0	1.35709e-05	0	0	1	0	0	0	0	0	0	0	0	0	1	0	0	0	0
1261	Archaea	Crenarchaeota	Bathyarchaeia	NA	NA	NA	ASV_ 3372	49	0	0	0	45	0	0	0	70	37	0	60	0.000229587	0	0	0	0.000176528	0	0	0	0.000222532	0.000123746	0	0.00016104	7.61194e-05	1	0	0	0	1	0	0	0	1	1	0	1	1	0	0	0	0
1262	Bacteria	Proteobacteria	Gammaproteobacteria	Burkholderiales	Comamonadaceae	Rivibacter	ASV_ 3373	47	13	0	0	0	0	0	0	0	0	0	0	0.000220216	7.44031e-05	0	0	0	0	0	0	0	0	0	0	2.45516e-05	1	0	0	0	0	0	0	0	0	0	0	0	1	0	0	0	0
1263	Bacteria	Patescibacteria	ABY1	NA	NA	NA	ASV_ 3388	11	26	0	0	0	0	23	24	0	0	57	82	5.15399e-05	0.000148806	0	0	0	0	7.39307e-05	6.55056e-05	0	0	0.000154968	0.000220088	5.95698e-05	0	1	0	0	0	0	0	0	0	0	1	1	1	0	0	0	0
1264	Bacteria	Proteobacteria	Gammaproteobacteria	Burkholderiales	Nitrosomonadaceae	mle1-7	ASV_ 3487	0	0	108	0	0	0	0	0	38	38	0	28	0	0	0.000344862	0	0	0	0	0	0.000120803	0.00012709	0	7.5152e-05	5.56589e-05	0	0	1	0	0	0	0	0	1	1	0	0	1	0	0	0	0
1265	Bacteria	Chloroflexi	Anaerolineae	SBR1031	NA	NA	ASV_ 3545	59	0	0	0	65	65	0	0	45	0	41	0	0.000276441	0	0	0	0.000254985	0.000253876	0	0	0.000143056	0	0.000111468	0	8.66522e-05	1	0	0	0	1	1	0	0	1	0	1	0	1	0	0	0	0
1266	Bacteria	Chloroflexi	Anaerolineae	SBR1031	A4b	NA	ASV_ 356	0	31	0	0	91	131	34	42	67	68	106	55	0	0.000177423	0	0	0.000356979	0.000511659	0.000109289	0.000114635	0.000212995	0.000227425	0.000288185	0.00014762	0.000178851	0	1	0	0	1	1	1	1	1	1	1	1	1	0	0	0	0
1267	Bacteria	Actinobacteriota	NA	NA	NA	NA	ASV_ 3567	0	0	36	21	14	0	0	0	0	0	0	0	0	0	0.000114954	8.15781e-05	5.49198e-05	0	0	0	0	0	0	0	2.09543e-05	0	0	1	0	0	0	0	0	0	0	0	0	1	0	0	0	0
1268	Bacteria	Planctomycetota	Planctomycetes	Pirellulales	Pirellulaceae	NA	ASV_ 3575	71	0	0	0	0	0	0	0	59	38	52	35	0.000332666	0	0	0	0	0	0	0	0.000187562	0.00012709	0.000141374	9.39401e-05	7.35528e-05	1	0	0	0	0	0	0	0	1	1	1	0	1	0	0	0	0
1269	Archaea	Crenarchaeota	Bathyarchaeia	NA	NA	NA	ASV_ 361	0	0	77	0	0	0	0	0	0	0	0	0	0	0	0.000245874	0	0	0	0	0	0	0	0	0	2.04895e-05	0	0	1	0	0	0	0	0	0	0	0	0	1	0	0	0	0
1270	Bacteria	Bacteroidota	Bacteroidia	Flavobacteriales	Schleiferiaceae	Schleiferia	ASV_ 364	11	19	25	10	276	396	0	0	883	577	0	0	5.15399e-05	0.000108743	7.98291e-05	3.88467e-05	0.00108271	0.00154669	0	0	0.00280708	0.00192977	0	0	0.0006371	0	1	0	0	1	1	0	0	1	1	0	0	1	0	0	0	0
1271	Bacteria	Latescibacterota	Latescibacteria	Latescibacterales	Latescibacteraceae	Candidatus Latescibacter	ASV_ 3653	0	0	28	34	0	0	0	0	28	22	0	11	0	0	8.94086e-05	0.000132079	0	0	0	0	8.90127e-05	7.35786e-05	0	2.9524e-05	3.44669e-05	0	0	0	1	0	0	0	0	0	0	0	0	1	0	0	0	0
1272	Bacteria	Acidobacteriota	Subgroup 22	NA	NA	NA	ASV_ 366	48	10	4	6	0	0	213	126	0	0	217	122	0.000224901	5.72331e-05	1.27727e-05	2.3308e-05	0	0	0.000684663	0.000343904	0	0	0.000589964	0.000327448	0.000188683	1	0	0	0	0	0	1	1	0	0	1	1	1	0	0	0	0
1273	Archaea	Aenigmarchaeota	Aenigmarchaeia	Aenigmarchaeales	NA	NA	ASV_ 3690	0	0	0	63	11	24	0	0	0	0	0	0	0	0	0	0.000244734	4.31513e-05	9.3739e-05	0	0	0	0	0	0	3.18021e-05	0	0	0	1	0	0	0	0	0	0	0	0	1	0	0	0	0
1274	Bacteria	Planctomycetota	Planctomycetes	Planctomycetales	Rubinisphaeraceae	SH-PL14	ASV_ 373	35	0	13	0	3766	755	0	0	0	0	0	0	0.00016399	0	4.15111e-05	0	0.0147734	0.00294887	0	0	0	0	0	0	0.00149398	1	0	0	0	1	1	0	0	0	0	0	0	1	0	0	0	0
1275	Bacteria	Proteobacteria	Gammaproteobacteria	Acidiferrobacterales	Acidiferrobacteraceae	Sulfurifustis	ASV_ 381	0	0	0	48	0	0	0	0	0	0	0	0	0	0	0	0.000186464	0	0	0	0	0	0	0	0	1.55387e-05	0	0	0	1	0	0	0	0	0	0	0	0	1	0	0	0	0
1276	Bacteria	Planctomycetota	OM190	NA	NA	NA	ASV_ 3833	21	20	0	0	0	0	0	0	0	0	0	0	9.83943e-05	0.000114466	0	0	0	0	0	0	0	0	0	0	1.77384e-05	0	1	0	0	0	0	0	0	0	0	0	0	1	0	0	0	0
1277	Bacteria	Proteobacteria	Alphaproteobacteria	Rhodospirillales	Magnetospirillaceae	Magnetospirillum	ASV_ 3856	22	13	0	0	0	0	0	0	0	0	0	0	0.00010308	7.44031e-05	0	0	0	0	0	0	0	0	0	0	1.47902e-05	1	0	0	0	0	0	0	0	0	0	0	0	1	0	0	0	0
1278	Archaea	Crenarchaeota	Bathyarchaeia	NA	NA	NA	ASV_ 3866	9	24	25	11	0	0	45	0	0	33	0	23	4.2169e-05	0.000137359	7.98291e-05	4.27314e-05	0	0	0.000144647	0	0	0.000110368	0	6.1732e-05	5.15697e-05	0	1	0	0	0	0	1	0	0	1	0	0	1	0	0	0	0
1279	Archaea	Crenarchaeota	Bathyarchaeia	NA	NA	NA	ASV_ 3930	0	0	18	26	0	0	0	0	0	0	0	0	0	0	5.7477e-05	0.000101001	0	0	0	0	0	0	0	0	1.32065e-05	0	0	0	1	0	0	0	0	0	0	0	0	1	0	0	0	0
1280	Bacteria	Bdellovibrionota	Oligoflexia	0319-6G20	NA	NA	ASV_ 3931	0	0	29	43	7	11	23	8	0	0	0	7	0	0	9.26018e-05	0.000167041	2.74599e-05	4.29637e-05	7.39307e-05	2.18352e-05	0	0	0	1.8788e-05	3.70517e-05	0	0	0	1	0	0	0	0	0	0	0	0	1	0	0	0	0
1281	Bacteria	Planctomycetota	Planctomycetes	Pirellulales	Pirellulaceae	NA	ASV_ 3966	32	11	12	0	0	0	0	0	0	0	126	0	0.000149934	6.29564e-05	3.8318e-05	0	0	0	0	0	0	0	0.00034256	0	4.94807e-05	1	0	0	0	0	0	0	0	0	0	1	0	1	0	0	0	0
1282	Bacteria	Elusimicrobiota	Elusimicrobia	Lineage IV	NA	NA	ASV_ 3988	0	0	42	0	60	72	0	0	57	0	0	0	0	0	0.000134113	0	0.000235371	0.000281217	0	0	0.000181204	0	0	0	6.93254e-05	0	0	1	0	1	1	0	0	1	0	0	0	1	0	0	0	0
1283	Bacteria	Proteobacteria	Gammaproteobacteria	Xanthomonadales	NA	NA	ASV_ 4015	68	0	0	0	0	0	0	0	0	0	0	0	0.00031861	0	0	0	0	0	0	0	0	0	0	0	2.65508e-05	1	0	0	0	0	0	0	0	0	0	0	0	1	0	0	0	0
1284	Bacteria	Proteobacteria	Alphaproteobacteria	Rhodobacterales	Rhodobacteraceae	Limibaculum	ASV_ 4039	39	0	28	23	0	0	0	0	0	0	15	0	0.000182732	0	8.94086e-05	8.93475e-05	0	0	0	0	0	0	4.07809e-05	0	3.35224e-05	1	0	0	0	0	0	0	0	0	0	0	0	1	0	0	0	0
1285	Bacteria	Armatimonadota	DG-56	NA	NA	NA	ASV_ 4109	0	0	38	0	0	0	0	0	0	0	0	0	0	0	0.00012134	0	0	0	0	0	0	0	0	0	1.01117e-05	0	0	1	0	0	0	0	0	0	0	0	0	1	0	0	0	0
1286	Bacteria	Desulfobacterota	Syntrophobacteria	Syntrophobacterales	Syntrophobacteraceae	NA	ASV_ 4123	0	0	37	23	0	0	9	0	0	0	6	5	0	0	0.000118147	8.93475e-05	0	0	2.89294e-05	0	0	0	1.63124e-05	1.342e-05	2.21797e-05	0	0	1	0	0	0	0	0	0	0	0	0	1	0	0	0	0
1287	Archaea	Crenarchaeota	Bathyarchaeia	NA	NA	NA	ASV_ 4176	0	0	30	41	0	0	0	0	0	0	0	0	0	0	9.57949e-05	0.000159272	0	0	0	0	0	0	0	0	2.12555e-05	0	0	0	1	0	0	0	0	0	0	0	0	1	0	0	0	0
1288	Bacteria	Chloroflexi	Anaerolineae	SBR1031	A4b	NA	ASV_ 4208	15	36	0	0	0	0	0	0	0	0	0	0	7.02816e-05	0.000206039	0	0	0	0	0	0	0	0	0	0	2.30267e-05	0	1	0	0	0	0	0	0	0	0	0	0	1	0	0	0	0
1289	Archaea	Crenarchaeota	Bathyarchaeia	NA	NA	NA	ASV_ 4212	27	0	0	0	0	0	0	0	48	53	23	42	0.000126507	0	0	0	0	0	0	0	0.000152593	0.000177258	6.25308e-05	0.000112728	5.26347e-05	1	0	0	0	0	0	0	0	1	1	0	1	1	0	0	0	0
1290	Bacteria	Cyanobacteria	Cyanobacteria	NA	NA	NA	ASV_ 4251	0	207	0	0	0	0	0	0	0	0	0	0	0	0.00118473	0	0	0	0	0	0	0	0	0	0	9.87271e-05	0	1	0	0	0	0	0	0	0	0	0	0	1	0	0	0	0
1291	Archaea	Thermoplasmatota	Thermoplasmata	NA	NA	NA	ASV_ 4275	19	25	8	11	48	38	0	0	13	0	0	0	8.90234e-05	0.000143083	2.55453e-05	4.27314e-05	0.000188297	0.00014842	0	0	4.13273e-05	0	0	0	5.65356e-05	0	1	0	0	1	1	0	0	0	0	0	0	1	0	0	0	0
1292	Bacteria	Proteobacteria	Alphaproteobacteria	NA	NA	NA	ASV_ 4279	23	0	0	0	0	0	0	0	0	0	7	9	0.000107765	0	0	0	0	0	0	0	0	0	1.90311e-05	2.4156e-05	1.25794e-05	1	0	0	0	0	0	0	0	0	0	0	0	1	0	0	0	0
1293	Bacteria	Acidobacteriota	Subgroup 21	NA	NA	NA	ASV_ 436	0	0	24	31	0	0	0	0	0	0	0	0	0	0	7.66359e-05	0.000120425	0	0	0	0	0	0	0	0	1.64217e-05	0	0	0	1	0	0	0	0	0	0	0	0	1	0	0	0	0
1294	Bacteria	Chloroflexi	JG30-KF-CM66	NA	NA	NA	ASV_ 4405	33	7	0	0	0	4	44	29	0	0	30	5	0.00015462	4.00632e-05	0	0	0	1.56232e-05	0.000141433	7.91526e-05	0	0	8.15619e-05	1.342e-05	4.38228e-05	1	0	0	0	0	0	1	0	0	0	0	0	1	0	0	0	0
1295	Bacteria	Bacteroidota	Bacteroidia	Chitinophagales	Saprospiraceae	NA	ASV_ 4456	16	25	0	0	0	0	0	0	0	0	3	0	7.49671e-05	0.000143083	0	0	0	0	0	0	0	0	8.15619e-06	0	1.88505e-05	0	1	0	0	0	0	0	0	0	0	0	0	1	0	0	0	0
1296	Bacteria	Chloroflexi	Anaerolineae	SBR1031	NA	NA	ASV_ 4513	0	0	34	0	0	0	0	0	0	0	0	0	0	0	0.000108568	0	0	0	0	0	0	0	0	0	9.0473e-06	0	0	1	0	0	0	0	0	0	0	0	0	1	0	0	0	0
1297	Bacteria	Verrucomicrobiota	Verrucomicrobiae	Methylacidiphilales	Methylacidiphilaceae	NA	ASV_ 452	0	30	0	0	459	330	0	0	0	0	319	494	0	0.000171699	0	0	0.00180059	0.00128891	0	0	0	0	0.000867274	0.0013259	0.000454531	0	1	0	0	1	1	0	0	0	0	1	1	1	0	0	0	0
1298	Bacteria	Chloroflexi	Anaerolineae	Anaerolineales	Anaerolineaceae	NA	ASV_ 4548	0	0	79	0	0	0	0	0	0	0	0	0	0	0	0.00025226	0	0	0	0	0	0	0	0	0	2.10217e-05	0	0	1	0	0	0	0	0	0	0	0	0	1	0	0	0	0
1299	Bacteria	Armatimonadota	NA	NA	NA	NA	ASV_ 455	0	0	0	27	0	0	273	199	311	408	5	0	0	0	0	0.000104886	0	0	0.000877526	0.00054315	0.000988676	0.00136455	1.35936e-05	0	0.000324365	0	0	0	1	0	0	1	1	1	1	0	0	1	0	0	0	0
1300	Bacteria	Chloroflexi	Dehalococcoidia	GIF9	NA	NA	ASV_ 4646	0	0	0	47	0	0	0	18	0	0	0	0	0	0	0	0.00018258	0	0	0	4.91292e-05	0	0	0	0	1.93091e-05	0	0	0	1	0	0	0	0	0	0	0	0	1	0	0	0	0
1301	Bacteria	Chloroflexi	Dehalococcoidia	t0.6.f	NA	NA	ASV_ 4647	28	0	0	0	0	16	0	0	67	33	20	16	0.000131192	0	0	0	0	6.24927e-05	0	0	0.000212995	0.000110368	5.43746e-05	4.2944e-05	5.11972e-05	1	0	0	0	0	0	0	0	1	1	0	0	1	0	0	0	0
1302	Bacteria	Myxococcota	Polyangia	NA	NA	NA	ASV_ 4648	0	0	47	23	0	0	0	0	0	24	0	0	0	0	0.000150079	8.93475e-05	0	0	0	0	0	8.02676e-05	0	0	2.66411e-05	0	0	1	0	0	0	0	0	0	0	0	0	1	0	0	0	0
1303	Archaea	Crenarchaeota	Bathyarchaeia	NA	NA	NA	ASV_ 4677	0	0	0	35	0	0	0	0	0	0	0	0	0	0	0	0.000135964	0	0	0	0	0	0	0	0	1.13303e-05	0	0	0	1	0	0	0	0	0	0	0	0	1	0	0	0	0
1304	Bacteria	Myxococcota	Polyangia	Haliangiales	Haliangiaceae	Haliangium	ASV_ 4711	28	0	0	0	0	0	0	0	0	0	0	0	0.000131192	0	0	0	0	0	0	0	0	0	0	0	1.09327e-05	1	0	0	0	0	0	0	0	0	0	0	0	1	0	0	0	0
1305	Bacteria	Planctomycetota	OM190	NA	NA	NA	ASV_ 4747	24	0	0	0	0	0	21	16	0	0	0	0	0.000112451	0	0	0	0	0	6.7502e-05	4.36704e-05	0	0	0	0	1.86352e-05	1	0	0	0	0	0	0	0	0	0	0	0	1	0	0	0	0
1306	Bacteria	Proteobacteria	Alphaproteobacteria	Rhodobacterales	Rhodobacteraceae	NA	ASV_ 4749	35	15	0	0	0	0	0	0	0	0	0	0	0.00016399	8.58497e-05	0	0	0	0	0	0	0	0	0	0	2.082e-05	1	0	0	0	0	0	0	0	0	0	0	0	1	0	0	0	0
1307	Bacteria	Cyanobacteria	Cyanobacteria	NA	NA	NA	ASV_ 477	79	13	3	0	0	0	0	0	0	0	0	0	0.00037015	7.44031e-05	9.57949e-06	0	0	0	0	0	0	0	0	0	3.78444e-05	1	0	0	0	0	0	0	0	0	0	0	0	1	0	0	0	0
1308	Bacteria	Myxococcota	Polyangia	Polyangiales	Sandaracinaceae	Sandaracinus	ASV_ 4796	49	0	0	0	0	0	0	0	0	0	0	0	0.000229587	0	0	0	0	0	0	0	0	0	0	0	1.91322e-05	1	0	0	0	0	0	0	0	0	0	0	0	1	0	0	0	0
1309	Bacteria	Myxococcota	Polyangia	UASB-TL25	NA	NA	ASV_ 484	14	24	0	0	133	197	0	0	75	109	71	91	6.55962e-05	0.000137359	0	0	0.000521738	0.000769441	0	0	0.000238427	0.000364548	0.00019303	0.000244244	0.000211199	0	1	0	0	1	1	0	0	1	1	1	1	1	0	0	0	0
1310	Bacteria	Myxococcota	Polyangia	Haliangiales	Haliangiaceae	Haliangium	ASV_ 4917	18	21	0	0	0	0	0	0	0	0	0	8	8.4338e-05	0.00012019	0	0	0	0	0	0	0	0	0	2.1472e-05	1.88333e-05	0	1	0	0	0	0	0	0	0	0	0	0	1	0	0	0	0
1311	Bacteria	Cyanobacteria	Cyanobacteria	Leptolyngbyales	Leptolyngbyaceae	Leptolyngbya RV74	ASV_ 4921	36	12	0	0	0	0	0	0	0	0	0	0	0.000168676	6.86797e-05	0	0	0	0	0	0	0	0	0	0	1.97796e-05	1	0	0	0	0	0	0	0	0	0	0	0	1	0	0	0	0
1312	Bacteria	Armatimonadota	DG-56	NA	NA	NA	ASV_ 4922	28	15	0	0	0	0	12	12	27	25	31	14	0.000131192	8.58497e-05	0	0	0	0	3.85726e-05	3.27528e-05	8.58336e-05	8.3612e-05	8.42806e-05	3.7576e-05	4.83058e-05	1	0	0	0	0	0	0	0	0	0	0	0	1	0	0	0	0
1313	Bacteria	Patescibacteria	Parcubacteria	Candidatus Moranbacteria	NA	NA	ASV_ 4934	0	0	0	31	0	0	0	0	0	0	0	17	0	0	0	0.000120425	0	0	0	0	0	0	0	4.5628e-05	1.38377e-05	0	0	0	1	0	0	0	0	0	0	0	0	1	0	0	0	0
1314	Bacteria	Chloroflexi	Anaerolineae	NA	NA	NA	ASV_ 4949	42	15	26	0	18	6	4	9	9	14	13	6	0.000196789	8.58497e-05	8.30223e-05	0	7.06112e-05	2.34348e-05	1.28575e-05	2.45646e-05	2.86112e-05	4.68227e-05	3.53435e-05	1.6104e-05	5.20008e-05	1	0	0	0	0	0	0	0	0	0	0	0	1	0	0	0	0
1315	Bacteria	Chloroflexi	Anaerolineae	SBR1031	A4b	NA	ASV_ 50	15	29	0	0	103	108	1660	1663	1965	1957	1616	1910	7.02816e-05	0.000165976	0	0	0.000404053	0.000421826	0.00533587	0.00453899	0.00624678	0.00654515	0.00439347	0.00512644	0.00277074	0	1	0	0	1	1	1	1	1	1	1	1	1	0	0	0	0
1316	Bacteria	Bacteroidota	Rhodothermia	Rhodothermales	Rhodothermaceae	NA	ASV_ 5031	31	14	0	0	0	0	0	0	0	0	0	0	0.000145249	8.01264e-05	0	0	0	0	0	0	0	0	0	0	1.87813e-05	1	0	0	0	0	0	0	0	0	0	0	0	1	0	0	0	0
1317	Bacteria	Nitrospirota	Thermodesulfovibrionia	NA	NA	NA	ASV_ 5034	0	0	44	20	0	0	0	0	0	0	0	0	0	0	0.000140499	7.76934e-05	0	0	0	0	0	0	0	0	1.81827e-05	0	0	1	0	0	0	0	0	0	0	0	0	1	0	0	0	0
1318	Bacteria	Desulfobacterota	Desulfuromonadia	Desulfuromonadales	Geothermobacteraceae	Geothermobacter	ASV_ 5051	0	19	0	0	0	0	0	0	0	0	0	16	0	0.000108743	0	0	0	0	0	0	0	0	0	4.2944e-05	1.26406e-05	0	1	0	0	0	0	0	0	0	0	0	0	1	0	0	0	0
1319	Bacteria	Sumerlaeota	Sumerlaeia	Sumerlaeales	Sumerlaeaceae	Sumerlaea	ASV_ 5052	0	0	30	36	0	0	7	18	8	6	26	20	0	0	9.57949e-05	0.000139848	0	0	2.25007e-05	4.91292e-05	2.54322e-05	2.00669e-05	7.06869e-05	5.368e-05	3.97616e-05	0	0	0	1	0	0	0	0	0	0	0	0	1	0	0	0	0
1320	Bacteria	Proteobacteria	Alphaproteobacteria	Defluviicoccales	NA	NA	ASV_ 5068	25	14	7	0	9	0	0	0	0	0	19	18	0.000117136	8.01264e-05	2.23521e-05	0	3.53056e-05	0	0	0	0	0	5.16558e-05	4.8312e-05	2.9574e-05	1	0	0	0	0	0	0	0	0	0	0	0	1	0	0	0	0
1321	Bacteria	Chloroflexi	Anaerolineae	MSB-5E12	NA	NA	ASV_ 5118	0	0	0	153	0	0	0	0	0	0	0	0	0	0	0	0.000594355	0	0	0	0	0	0	0	0	4.95296e-05	0	0	0	1	0	0	0	0	0	0	0	0	1	0	0	0	0
1322	Bacteria	Bdellovibrionota	Bdellovibrionia	Bdellovibrionales	Bdellovibrionaceae	OM27 clade	ASV_ 512	22	11	0	0	1749	782	0	0	0	0	144	62	0.00010308	6.29564e-05	0	0	0.00686106	0.00305433	0	0	0	0	0.000391497	0.000166408	0.000886611	1	0	0	0	1	1	0	0	0	0	1	1	1	0	0	0	0
1323	Bacteria	Acidobacteriota	Vicinamibacteria	Subgroup 17	NA	NA	ASV_ 5165	37	12	0	0	0	0	0	0	0	0	11	0	0.000173361	6.86797e-05	0	0	0	0	0	0	0	0	2.9906e-05	0	2.26623e-05	1	0	0	0	0	0	0	0	0	0	0	0	1	0	0	0	0
1324	Bacteria	Proteobacteria	Alphaproteobacteria	Sphingomonadales	Sphingomonadaceae	NA	ASV_ 519	31	13	0	0	527	112	38	38	18	0	27	13	0.000145249	7.44031e-05	0	0	0.00206734	0.000437449	0.000122146	0.000103717	5.72224e-05	0	7.34057e-05	3.4892e-05	0.000259652	1	0	0	0	1	1	1	1	0	0	0	0	1	0	0	0	0
1325	Bacteria	Bdellovibrionota	Oligoflexia	Oligoflexales	Oligoflexaceae	NA	ASV_ 5212	0	0	20	27	0	0	0	0	0	0	0	0	0	0	6.38633e-05	0.000104886	0	0	0	0	0	0	0	0	1.40625e-05	0	0	0	1	0	0	0	0	0	0	0	0	1	0	0	0	0
1326	Bacteria	NA	NA	NA	NA	NA	ASV_ 5226	0	0	46	25	0	44	0	0	0	0	0	0	0	0	0.000146886	9.71168e-05	0	0.000171855	0	0	0	0	0	0	3.46548e-05	0	0	1	0	0	1	0	0	0	0	0	0	1	0	0	0	0
1327	Bacteria	Proteobacteria	Gammaproteobacteria	Burkholderiales	Comamonadaceae	NA	ASV_ 5284	21	18	0	0	0	0	0	0	0	0	0	0	9.83943e-05	0.00010302	0	0	0	0	0	0	0	0	0	0	1.67845e-05	0	1	0	0	0	0	0	0	0	0	0	0	1	0	0	0	0
1328	Bacteria	Myxococcota	Myxococcia	Myxococcales	Myxococcaceae	P3OB-42	ASV_ 5350	26	11	0	0	0	0	0	0	0	0	59	35	0.000121822	6.29564e-05	0	0	0	0	0	0	0	0	0.000160405	9.39401e-05	3.65936e-05	1	0	0	0	0	0	0	0	0	0	1	0	1	0	0	0	0
1329	Archaea	Crenarchaeota	Bathyarchaeia	NA	NA	NA	ASV_ 5401	0	0	27	31	0	0	0	0	0	0	0	0	0	0	8.62154e-05	0.000120425	0	0	0	0	0	0	0	0	1.722e-05	0	0	0	1	0	0	0	0	0	0	0	0	1	0	0	0	0
1330	Bacteria	Chloroflexi	Dehalococcoidia	S085	NA	NA	ASV_ 5426	30	13	0	0	0	0	34	34	0	4	0	0	0.000140563	7.44031e-05	0	0	0	0	0.000109289	9.27996e-05	0	1.33779e-05	0	0	3.58694e-05	1	0	0	0	0	0	1	0	0	0	0	0	1	0	0	0	0
1331	Bacteria	Spirochaetota	V2072-189E03	NA	NA	NA	ASV_ 548	49	14	0	0	72	14	0	0	143	243	124	66	0.000229587	8.01264e-05	0	0	0.000282445	5.46811e-05	0	0	0.0004546	0.000812709	0.000337122	0.000177144	0.000202368	1	0	0	0	1	0	0	0	1	1	1	1	1	0	0	0	0
1332	Bacteria	Proteobacteria	Gammaproteobacteria	Burkholderiales	Methylophilaceae	Methylobacillus	ASV_ 5484	20	21	0	0	26	35	0	0	0	0	0	0	9.37089e-05	0.00012019	0	0	0.000101994	0.000136703	0	0	0	0	0	0	3.77163e-05	0	1	0	0	1	1	0	0	0	0	0	0	1	0	0	0	0
1333	Bacteria	Proteobacteria	Alphaproteobacteria	Sphingomonadales	Sphingomonadaceae	Porphyrobacter	ASV_ 549	31	0	0	0	78	18	13	0	0	0	0	0	0.000145249	0	0	0	0.000305982	7.03043e-05	4.17869e-05	0	0	0	0	0	4.69435e-05	1	0	0	0	1	0	0	0	0	0	0	0	1	0	0	0	0
1334	Bacteria	Hydrogenedentes	Hydrogenedentia	Hydrogenedentiales	Hydrogenedensaceae	NA	ASV_ 5532	0	0	19	27	0	0	0	0	0	0	0	0	0	0	6.06701e-05	0.000104886	0	0	0	0	0	0	0	0	1.37964e-05	0	0	0	1	0	0	0	0	0	0	0	0	1	0	0	0	0
1335	Bacteria	Acidobacteriota	Vicinamibacteria	Vicinamibacterales	Vicinamibacteraceae	NA	ASV_ 5533	38	15	0	0	0	0	0	0	0	0	0	0	0.000178047	8.58497e-05	0	0	0	0	0	0	0	0	0	0	2.19914e-05	1	0	0	0	0	0	0	0	0	0	0	0	1	0	0	0	0
1336	Bacteria	Proteobacteria	Alphaproteobacteria	NA	NA	NA	ASV_ 5630	0	0	33	16	0	0	0	0	0	0	18	0	0	0	0.000105374	6.21547e-05	0	0	0	0	0	0	4.89371e-05	0	1.80389e-05	0	0	1	0	0	0	0	0	0	0	0	0	1	0	0	0	0
1337	Bacteria	Proteobacteria	Alphaproteobacteria	Micavibrionales	Micavibrionaceae	NA	ASV_ 5631	18	72	0	0	0	0	0	0	0	0	15	25	8.4338e-05	0.000412078	0	0	0	0	0	0	0	0	4.07809e-05	6.71e-05	5.03581e-05	0	1	0	0	0	0	0	0	0	0	0	0	1	0	0	0	0
1338	Archaea	Aenigmarchaeota	Aenigmarchaeia	Aenigmarchaeales	NA	NA	ASV_ 5633	0	0	61	0	0	0	0	0	0	0	27	42	0	0	0.000194783	0	0	0	0	0	0	0	7.34057e-05	0.000112728	3.17431e-05	0	0	1	0	0	0	0	0	0	0	0	1	1	0	0	0	0
1339	Bacteria	Chloroflexi	Dehalococcoidia	GIF9	AB-539-J10	SCGC-AB-539-J10	ASV_ 5680	0	0	30	33	0	0	0	0	0	0	0	0	0	0	9.57949e-05	0.000128194	0	0	0	0	0	0	0	0	1.86658e-05	0	0	0	1	0	0	0	0	0	0	0	0	1	0	0	0	0
1340	Bacteria	Proteobacteria	Gammaproteobacteria	Xanthomonadales	Rhodanobacteraceae	NA	ASV_ 5710	29	0	0	0	0	0	0	0	0	0	0	0	0.000135878	0	0	0	0	0	0	0	0	0	0	0	1.13232e-05	1	0	0	0	0	0	0	0	0	0	0	0	1	0	0	0	0
1341	Archaea	Crenarchaeota	Bathyarchaeia	NA	NA	NA	ASV_ 5713	0	0	38	0	0	0	0	0	0	0	0	0	0	0	0.00012134	0	0	0	0	0	0	0	0	0	1.01117e-05	0	0	1	0	0	0	0	0	0	0	0	0	1	0	0	0	0
1342	Archaea	Crenarchaeota	Bathyarchaeia	NA	NA	NA	ASV_ 5714	0	0	0	63	0	0	0	0	0	0	0	0	0	0	0	0.000244734	0	0	0	0	0	0	0	0	2.03945e-05	0	0	0	1	0	0	0	0	0	0	0	0	1	0	0	0	0
1343	Archaea	Crenarchaeota	Bathyarchaeia	NA	NA	NA	ASV_ 5743	0	0	35	0	0	0	0	0	0	0	0	0	0	0	0.000111761	0	0	0	0	0	0	0	0	0	9.3134e-06	0	0	1	0	0	0	0	0	0	0	0	0	1	0	0	0	0
1344	Bacteria	Bdellovibrionota	Oligoflexia	0319-6G20	NA	NA	ASV_ 5849	13	20	0	0	19	0	0	0	0	0	22	20	6.09108e-05	0.000114466	0	0	7.45341e-05	0	0	0	0	0	5.9812e-05	5.368e-05	3.02836e-05	0	1	0	0	0	0	0	0	0	0	0	0	1	0	0	0	0
1345	Bacteria	Firmicutes	Clostridia	Peptostreptococcales-Tissierellales	Peptostreptococcaceae	Tepidibacter	ASV_ 5881	24	14	0	0	0	5	10	0	13	0	18	0	0.000112451	8.01264e-05	0	0	0	1.9529e-05	3.21438e-05	0	4.13273e-05	0	4.89371e-05	0	2.78762e-05	1	0	0	0	0	0	0	0	0	0	0	0	1	0	0	0	0
1346	Bacteria	Chloroflexi	Anaerolineae	SBR1031	NA	NA	ASV_ 5882	0	0	48	0	0	0	0	0	0	0	0	0	0	0	0.000153272	0	0	0	0	0	0	0	0	0	1.27727e-05	0	0	1	0	0	0	0	0	0	0	0	0	1	0	0	0	0
1347	Archaea	Crenarchaeota	Bathyarchaeia	NA	NA	NA	ASV_ 5918	41	0	24	5	50	0	0	0	0	0	0	0	0.000192103	0	7.66359e-05	1.94234e-05	0.000196142	0	0	0	0	0	0	0	4.03587e-05	1	0	0	0	1	0	0	0	0	0	0	0	1	0	0	0	0
1348	Bacteria	Proteobacteria	Gammaproteobacteria	Pseudomonadales	Porticoccaceae	C1-B045	ASV_ 5953	34	0	0	0	0	0	0	0	0	0	0	0	0.000159305	0	0	0	0	0	0	0	0	0	0	0	1.32754e-05	1	0	0	0	0	0	0	0	0	0	0	0	1	0	0	0	0
1349	Bacteria	Chloroflexi	Anaerolineae	SBR1031	A4b	OLB13	ASV_ 5994	10	38	0	0	0	0	0	0	0	0	0	0	4.68544e-05	0.000217486	0	0	0	0	0	0	0	0	0	0	2.20284e-05	0	1	0	0	0	0	0	0	0	0	0	0	1	0	0	0	0
1350	Bacteria	NA	NA	NA	NA	NA	ASV_ 601	7	7	35	24	45	91	0	0	17	10	14	19	3.27981e-05	4.00632e-05	0.000111761	9.32321e-05	0.000176528	0.000355427	0	0	5.40434e-05	3.34448e-05	3.80622e-05	5.0996e-05	8.21963e-05	0	0	1	0	1	1	0	0	0	0	0	0	1	0	0	0	0
1351	Bacteria	Proteobacteria	Gammaproteobacteria	Ga0077536	NA	NA	ASV_ 6021	10	23	0	0	0	0	0	0	0	0	0	0	4.68544e-05	0.000131636	0	0	0	0	0	0	0	0	0	0	1.48742e-05	0	1	0	0	0	0	0	0	0	0	0	0	1	0	0	0	0
1352	Bacteria	NA	NA	NA	NA	NA	ASV_ 6024	0	0	117	0	0	0	0	0	0	0	0	0	0	0	0.0003736	0	0	0	0	0	0	0	0	0	3.11333e-05	0	0	1	0	0	0	0	0	0	0	0	0	1	0	0	0	0
1353	Archaea	Crenarchaeota	Bathyarchaeia	NA	NA	NA	ASV_ 6025	0	0	24	32	0	0	0	0	0	0	0	0	0	0	7.66359e-05	0.000124309	0	0	0	0	0	0	0	0	1.67455e-05	0	0	0	1	0	0	0	0	0	0	0	0	1	0	0	0	0
1354	Bacteria	Proteobacteria	Gammaproteobacteria	Burkholderiales	Hydrogenophilaceae	Sulfuritortus	ASV_ 606	27	0	0	0	130	281	0	25	0	0	46	49	0.000126507	0	0	0	0.00050997	0.00109753	0	6.8235e-05	0	0	0.000125062	0.000131516	0.000171568	1	0	0	0	1	1	0	0	0	0	1	1	1	0	0	0	0
1355	Bacteria	Dependentiae	Babeliae	Babeliales	Babeliaceae	NA	ASV_ 6096	29	0	0	0	0	0	0	0	0	0	0	15	0.000135878	0	0	0	0	0	0	0	0	0	0	4.026e-05	1.46782e-05	1	0	0	0	0	0	0	0	0	0	0	0	1	0	0	0	0
1356	Archaea	Crenarchaeota	Bathyarchaeia	NA	NA	NA	ASV_ 6137	0	0	31	29	0	0	0	0	0	0	0	0	0	0	9.89881e-05	0.000112655	0	0	0	0	0	0	0	0	1.7637e-05	0	0	0	1	0	0	0	0	0	0	0	0	1	0	0	0	0
1357	Bacteria	Firmicutes	Clostridia	Oscillospirales	Hungateiclostridiaceae	NA	ASV_ 6210	0	0	0	62	0	0	0	0	5	0	0	0	0	0	0	0.00024085	0	0	0	0	1.58951e-05	0	0	0	2.13954e-05	0	0	0	1	0	0	0	0	0	0	0	0	1	0	0	0	0
1358	Bacteria	Verrucomicrobiota	Chlamydiae	Chlamydiales	cvE6	NA	ASV_ 6240	15	19	0	0	0	0	0	0	0	0	0	0	7.02816e-05	0.000108743	0	0	0	0	0	0	0	0	0	0	1.49187e-05	0	1	0	0	0	0	0	0	0	0	0	0	1	0	0	0	0
1359	Archaea	Crenarchaeota	Bathyarchaeia	NA	NA	NA	ASV_ 6358	14	18	7	0	9	30	0	0	0	0	0	0	6.55962e-05	0.00010302	2.23521e-05	0	3.53056e-05	0.000117174	0	0	0	0	0	0	2.86206e-05	0	1	0	0	0	1	0	0	0	0	0	0	1	0	0	0	0
1360	Bacteria	Sva0485	NA	NA	NA	NA	ASV_ 6417	0	0	58	0	0	0	28	0	0	0	0	0	0	0	0.000185204	0	0	0	9.00026e-05	0	0	0	0	0	2.29338e-05	0	0	1	0	0	0	0	0	0	0	0	0	1	0	0	0	0
1361	Archaea	Crenarchaeota	Bathyarchaeia	NA	NA	NA	ASV_ 643	0	0	72	0	166	222	0	0	0	0	0	0	0	0	0.000229908	0	0.000651192	0.000867086	0	0	0	0	0	0	0.000145682	0	0	1	0	1	1	0	0	0	0	0	0	1	0	0	0	0
1362	Bacteria	Proteobacteria	Gammaproteobacteria	Burkholderiales	Comamonadaceae	NA	ASV_ 6459	33	0	0	0	0	14	0	0	0	0	0	0	0.00015462	0	0	0	0	5.46811e-05	0	0	0	0	0	0	1.74417e-05	1	0	0	0	0	0	0	0	0	0	0	0	1	0	0	0	0
1363	Bacteria	Chloroflexi	KD4-96	NA	NA	NA	ASV_ 6461	11	7	37	20	0	0	0	0	0	0	21	9	5.15399e-05	4.00632e-05	0.000118147	7.76934e-05	0	0	0	0	0	0	5.70933e-05	2.4156e-05	3.07244e-05	0	0	1	0	0	0	0	0	0	0	0	0	1	0	0	0	0
1364	Bacteria	Chloroflexi	Anaerolineae	Anaerolineales	Anaerolineaceae	NA	ASV_ 6529	0	0	52	23	0	0	0	0	8	3	0	6	0	0	0.000166045	8.93475e-05	0	0	0	0	2.54322e-05	1.00334e-05	0	1.6104e-05	2.55801e-05	0	0	1	0	0	0	0	0	0	0	0	0	1	0	0	0	0
1365	Bacteria	Verrucomicrobiota	Verrucomicrobiae	Pedosphaerales	Pedosphaeraceae	NA	ASV_ 6571	0	0	18	34	0	0	0	0	0	0	0	0	0	0	5.7477e-05	0.000132079	0	0	0	0	0	0	0	0	1.57963e-05	0	0	0	1	0	0	0	0	0	0	0	0	1	0	0	0	0
1366	Archaea	Crenarchaeota	Bathyarchaeia	NA	NA	NA	ASV_ 6606	6	59	2	1	26	0	0	0	3	2	0	2	2.81127e-05	0.000337675	6.38633e-06	3.88467e-06	0.000101994	0	0	0	9.53707e-06	6.68896e-06	0	5.368e-06	4.16373e-05	0	1	0	0	1	0	0	0	0	0	0	0	1	0	0	0	0
1367	Bacteria	Patescibacteria	Parcubacteria	NA	NA	NA	ASV_ 6684	0	52	0	0	0	0	0	0	0	0	0	0	0	0.000297612	0	0	0	0	0	0	0	0	0	0	2.4801e-05	0	1	0	0	0	0	0	0	0	0	0	0	1	0	0	0	0
1368	Bacteria	Proteobacteria	Gammaproteobacteria	Burkholderiales	Comamonadaceae	Rubrivivax	ASV_ 6803	0	33	0	0	0	0	0	0	0	0	0	0	0	0.000188869	0	0	0	0	0	0	0	0	0	0	1.57391e-05	0	1	0	0	0	0	0	0	0	0	0	0	1	0	0	0	0
1369	Archaea	Nanoarchaeota	Nanoarchaeia	Woesearchaeales	GW2011	AR15	ASV_ 6805	0	0	24	30	0	0	0	0	0	0	0	0	0	0	7.66359e-05	0.00011654	0	0	0	0	0	0	0	0	1.6098e-05	0	0	0	1	0	0	0	0	0	0	0	0	1	0	0	0	0
1370	Bacteria	Acetothermia	Acetothermiia	NA	NA	NA	ASV_ 691	16	19	9	14	0	0	185	242	50	36	181	195	7.49671e-05	0.000108743	2.87385e-05	5.43854e-05	0	0	0.00059466	0.000660515	0.000158951	0.000120401	0.00049209	0.00052338	0.000234736	0	1	0	0	0	0	1	1	1	1	1	1	1	0	0	0	0
1371	Archaea	Crenarchaeota	Bathyarchaeia	NA	NA	NA	ASV_ 695	0	0	25	31	0	0	0	0	0	0	0	0	0	0	7.98291e-05	0.000120425	0	0	0	0	0	0	0	0	1.66878e-05	0	0	0	1	0	0	0	0	0	0	0	0	1	0	0	0	0
1372	Bacteria	Patescibacteria	CPR2	NA	NA	NA	ASV_ 6953	17	19	0	0	0	0	0	0	0	0	6	20	7.96525e-05	0.000108743	0	0	0	0	0	0	0	0	1.63124e-05	5.368e-05	2.15323e-05	0	1	0	0	0	0	0	0	0	0	0	0	1	0	0	0	0
1373	Bacteria	Chloroflexi	Dehalococcoidia	Dehalococcoidales	NA	NA	ASV_ 6994	0	0	39	0	0	0	0	0	0	0	0	0	0	0	0.000124533	0	0	0	0	0	0	0	0	0	1.03778e-05	0	0	1	0	0	0	0	0	0	0	0	0	1	0	0	0	0
1374	Bacteria	Chloroflexi	Anaerolineae	SBR1031	NA	NA	ASV_ 7051	0	0	0	38	0	0	0	0	0	0	0	0	0	0	0	0.000147618	0	0	0	0	0	0	0	0	1.23015e-05	0	0	0	1	0	0	0	0	0	0	0	0	1	0	0	0	0
1375	Bacteria	MBNT15	NA	NA	NA	NA	ASV_ 7129	26	14	0	0	0	0	0	0	0	0	0	0	0.000121822	8.01264e-05	0	0	0	0	0	0	0	0	0	0	1.6829e-05	1	0	0	0	0	0	0	0	0	0	0	0	1	0	0	0	0
1376	Bacteria	Acidobacteriota	Thermoanaerobaculia	Thermoanaerobaculales	Thermoanaerobaculaceae	Thermoanaerobaculum	ASV_ 713	22	13	23	18	8	0	53	45	13	22	559	510	0.00010308	7.44031e-05	7.34428e-05	6.99241e-05	3.13828e-05	0	0.000170362	0.000122823	4.13273e-05	7.35786e-05	0.00151977	0.00136884	0.000304078	1	0	0	0	0	0	1	1	0	0	1	1	1	0	0	0	0
1377	Bacteria	Proteobacteria	Gammaproteobacteria	Burkholderiales	Comamonadaceae	Hydrogenophaga	ASV_ 7265	33	0	0	0	0	0	0	0	0	0	0	0	0.00015462	0	0	0	0	0	0	0	0	0	0	0	1.2885e-05	1	0	0	0	0	0	0	0	0	0	0	0	1	0	0	0	0
1378	Bacteria	Acidobacteriota	Vicinamibacteria	Vicinamibacterales	Vicinamibacteraceae	NA	ASV_ 7269	19	19	0	0	0	0	0	0	0	0	0	0	8.90234e-05	0.000108743	0	0	0	0	0	0	0	0	0	0	1.64805e-05	0	1	0	0	0	0	0	0	0	0	0	0	1	0	0	0	0
1379	Archaea	Crenarchaeota	Nitrososphaeria	SCGC AB-179-E04	NA	NA	ASV_ 7275	0	0	35	19	0	0	0	0	0	0	0	0	0	0	0.000111761	7.38088e-05	0	0	0	0	0	0	0	0	1.54641e-05	0	0	1	0	0	0	0	0	0	0	0	0	1	0	0	0	0
1380	Bacteria	NA	NA	NA	NA	NA	ASV_ 7315	19	21	0	0	0	0	0	0	0	0	0	0	8.90234e-05	0.00012019	0	0	0	0	0	0	0	0	0	0	1.74344e-05	0	1	0	0	0	0	0	0	0	0	0	0	1	0	0	0	0
1381	Archaea	Crenarchaeota	Bathyarchaeia	NA	NA	NA	ASV_ 7324	0	0	25	32	0	0	0	0	0	0	0	0	0	0	7.98291e-05	0.000124309	0	0	0	0	0	0	0	0	1.70116e-05	0	0	0	1	0	0	0	0	0	0	0	0	1	0	0	0	0
1382	Bacteria	Proteobacteria	Alphaproteobacteria	Rhizobiales	Xanthobacteraceae	NA	ASV_ 7378	25	0	0	0	0	0	33	25	0	0	0	0	0.000117136	0	0	0	0	0	0.000106075	6.8235e-05	0	0	0	0	2.42871e-05	1	0	0	0	0	0	1	0	0	0	0	0	1	0	0	0	0
1383	Bacteria	Nitrospirota	Thermodesulfovibrionia	NA	NA	NA	ASV_ 745	31	0	0	0	0	0	208	195	277	316	300	319	0.000145249	0	0	0	0	0	0.000668591	0.000532233	0.00088059	0.00105686	0.000815619	0.000856197	0.000412944	1	0	0	0	0	0	1	1	1	1	1	1	1	0	0	0	0
1384	Bacteria	Methylomirabilota	Methylomirabilia	Rokubacteriales	NA	NA	ASV_ 751	24	16	0	0	0	0	502	660	39	49	453	266	0.000112451	9.1573e-05	0	0	0	0	0.00161362	0.0018014	0.000123982	0.00016388	0.00123158	0.000713944	0.000487703	1	0	0	0	0	0	1	1	1	1	1	1	1	0	0	0	0
1385	Bacteria	Sva0485	NA	NA	NA	NA	ASV_ 7515	11	21	12	13	13	0	1	1	2	4	2	0	5.15399e-05	0.00012019	3.8318e-05	5.05007e-05	5.0997e-05	0	3.21438e-06	2.7294e-06	6.35805e-06	1.33779e-05	5.43746e-06	0	2.85552e-05	0	1	0	0	0	0	0	0	0	0	0	0	1	0	0	0	0
1386	Archaea	Crenarchaeota	Bathyarchaeia	NA	NA	NA	ASV_ 7516	1	37	0	0	0	0	18	1	4	9	4	6	4.68544e-06	0.000211763	0	0	0	0	5.78588e-05	2.7294e-06	1.27161e-05	3.01003e-05	1.08749e-05	1.6104e-05	2.89026e-05	0	1	0	0	0	0	0	0	0	0	0	0	1	0	0	0	0
1387	Bacteria	Nitrospirota	Thermodesulfovibrionia	NA	NA	NA	ASV_ 7565	0	0	33	20	0	0	0	0	0	0	0	0	0	0	0.000105374	7.76934e-05	0	0	0	0	0	0	0	0	1.52557e-05	0	0	1	0	0	0	0	0	0	0	0	0	1	0	0	0	0
1388	Bacteria	Planctomycetota	Planctomycetes	Planctomycetales	Rubinisphaeraceae	SH-PL14	ASV_ 758	1	27	0	0	12	0	414	257	103	36	108	79	4.68544e-06	0.000154529	0	0	4.70741e-05	0	0.00133075	0.000701456	0.000327439	0.000120401	0.000293623	0.000212036	0.000266	0	1	0	0	0	0	1	1	1	1	1	1	1	0	0	0	0
1389	Bacteria	Desulfobacterota	Desulfovibrionia	Desulfovibrionales	Desulfovibrionaceae	Desulfovibrio	ASV_ 7753	42	17	0	0	0	0	0	0	0	0	0	0	0.000196789	9.72963e-05	0	0	0	0	0	0	0	0	0	0	2.45071e-05	1	0	0	0	0	0	0	0	0	0	0	0	1	0	0	0	0
1390	Bacteria	Planctomycetota	Planctomycetes	Pirellulales	Pirellulaceae	NA	ASV_ 7754	0	64	0	0	0	0	0	0	0	0	0	0	0	0.000366292	0	0	0	0	0	0	0	0	0	0	3.05243e-05	0	1	0	0	0	0	0	0	0	0	0	0	1	0	0	0	0
1391	Bacteria	NA	NA	NA	NA	NA	ASV_ 7756	0	0	36	0	6	0	0	0	0	0	0	0	0	0	0.000114954	0	2.35371e-05	0	0	0	0	0	0	0	1.15409e-05	0	0	1	0	0	0	0	0	0	0	0	0	1	0	0	0	0
1392	Bacteria	Chloroflexi	Dehalococcoidia	GIF9	NA	NA	ASV_ 7931	12	0	0	31	0	0	21	0	0	0	8	0	5.62253e-05	0	0	0.000120425	0	0	6.7502e-05	0	0	0	2.17498e-05	0	2.21585e-05	0	0	0	1	0	0	0	0	0	0	0	0	1	0	0	0	0
1393	Bacteria	Acidobacteriota	Aminicenantia	Aminicenantales	NA	NA	ASV_ 8048	0	0	0	29	0	0	0	0	0	0	0	0	0	0	0	0.000112655	0	0	0	0	0	0	0	0	9.38796e-06	0	0	0	1	0	0	0	0	0	0	0	0	1	0	0	0	0
1394	Bacteria	Planctomycetota	vadinHA49	NA	NA	NA	ASV_ 8118	33	17	0	0	0	0	0	0	0	0	0	0	0.00015462	9.72963e-05	0	0	0	0	0	0	0	0	0	0	2.0993e-05	1	0	0	0	0	0	0	0	0	0	0	0	1	0	0	0	0
1395	Archaea	Crenarchaeota	Bathyarchaeia	NA	NA	NA	ASV_ 8120	0	18	3	0	3	3	0	0	18	8	16	0	0	0.00010302	9.57949e-06	0	1.17685e-05	1.17174e-05	0	0	5.72224e-05	2.67559e-05	4.34997e-05	0	2.19636e-05	0	1	0	0	0	0	0	0	0	0	0	0	1	0	0	0	0
1396	Archaea	Crenarchaeota	Bathyarchaeia	NA	NA	NA	ASV_ 8122	0	0	46	23	0	0	0	0	0	0	0	0	0	0	0.000146886	8.93475e-05	0	0	0	0	0	0	0	0	1.96861e-05	0	0	1	0	0	0	0	0	0	0	0	0	1	0	0	0	0
1397	Bacteria	Patescibacteria	Parcubacteria	NA	NA	NA	ASV_ 8188	34	0	0	0	0	0	0	0	0	0	0	0	0.000159305	0	0	0	0	0	0	0	0	0	0	0	1.32754e-05	1	0	0	0	0	0	0	0	0	0	0	0	1	0	0	0	0
1398	Bacteria	Proteobacteria	Alphaproteobacteria	Parvibaculales	Parvibaculaceae	Parvibaculum	ASV_ 8194	0	25	0	0	0	0	0	0	0	0	0	0	0	0.000143083	0	0	0	0	0	0	0	0	0	0	1.19236e-05	0	1	0	0	0	0	0	0	0	0	0	0	1	0	0	0	0
1399	Bacteria	Acidobacteriota	Thermoanaerobaculia	Thermoanaerobaculales	Thermoanaerobaculaceae	Thermoanaerobaculum	ASV_ 823	12	11	19	33	4	0	23	20	421	635	397	210	5.62253e-05	6.29564e-05	6.06701e-05	0.000128194	1.56914e-05	0	7.39307e-05	5.4588e-05	0.00133837	0.00212375	0.00107934	0.00056364	0.000463112	0	0	0	1	0	0	0	0	1	1	1	1	1	0	0	0	0
1400	Archaea	Crenarchaeota	Bathyarchaeia	NA	NA	NA	ASV_ 8264	4	19	19	9	0	0	0	16	0	0	0	0	1.87418e-05	0.000108743	6.06701e-05	3.4962e-05	0	0	0	4.36704e-05	0	0	0	0	2.22323e-05	0	1	0	0	0	0	0	0	0	0	0	0	1	0	0	0	0
1401	Archaea	Crenarchaeota	Bathyarchaeia	NA	NA	NA	ASV_ 8267	0	0	19	33	0	0	0	0	0	0	0	0	0	0	6.06701e-05	0.000128194	0	0	0	0	0	0	0	0	1.57387e-05	0	0	0	1	0	0	0	0	0	0	0	0	1	0	0	0	0
1402	Bacteria	Fibrobacterota	Fibrobacteria	Fibrobacterales	B122	NA	ASV_ 8348	11	23	0	0	0	0	0	0	0	0	9	20	5.15399e-05	0.000131636	0	0	0	0	0	0	0	0	2.44686e-05	5.368e-05	2.17771e-05	0	1	0	0	0	0	0	0	0	0	0	0	1	0	0	0	0
1403	Archaea	Crenarchaeota	Bathyarchaeia	NA	NA	NA	ASV_ 8349	0	0	31	34	0	0	0	0	0	0	0	0	0	0	9.89881e-05	0.000132079	0	0	0	0	0	0	0	0	1.92556e-05	0	0	0	1	0	0	0	0	0	0	0	0	1	0	0	0	0
1404	Bacteria	NA	NA	NA	NA	NA	ASV_ 8425	18	18	0	0	0	0	0	0	0	0	9	18	8.4338e-05	0.00010302	0	0	0	0	0	0	0	0	2.44686e-05	4.8312e-05	2.16782e-05	0	1	0	0	0	0	0	0	0	0	0	0	1	0	0	0	0
1405	Bacteria	Bdellovibrionota	Bdellovibrionia	Bdellovibrionales	Bdellovibrionaceae	Bdellovibrio	ASV_ 8486	20	39	0	0	0	0	0	0	0	0	0	0	9.37089e-05	0.000223209	0	0	0	0	0	0	0	0	0	0	2.64098e-05	0	1	0	0	0	0	0	0	0	0	0	0	1	0	0	0	0
1406	Archaea	Nanoarchaeota	Nanoarchaeia	Woesearchaeales	NA	NA	ASV_ 8492	25	17	0	0	0	0	0	0	0	0	8	14	0.000117136	9.72963e-05	0	0	0	0	0	0	0	0	2.17498e-05	3.7576e-05	2.28132e-05	1	0	0	0	0	0	0	0	0	0	0	0	1	0	0	0	0
1407	Archaea	Crenarchaeota	Bathyarchaeia	NA	NA	NA	ASV_ 8494	0	0	36	0	0	0	0	28	0	0	0	0	0	0	0.000114954	0	0	0	0	7.64232e-05	0	0	0	0	1.59481e-05	0	0	1	0	0	0	0	0	0	0	0	0	1	0	0	0	0
1408	Bacteria	Sumerlaeota	Sumerlaeia	Sumerlaeales	Sumerlaeaceae	Sumerlaea	ASV_ 8557	23	0	0	0	0	0	0	0	0	0	0	0	0.000107765	0	0	0	0	0	0	0	0	0	0	0	8.98043e-06	1	0	0	0	0	0	0	0	0	0	0	0	1	0	0	0	0
1409	Bacteria	Sumerlaeota	Sumerlaeia	Sumerlaeales	Sumerlaeaceae	Sumerlaea	ASV_ 8563	35	10	0	0	0	0	0	0	0	0	0	0	0.00016399	5.72331e-05	0	0	0	0	0	0	0	0	0	0	1.84353e-05	1	0	0	0	0	0	0	0	0	0	0	0	1	0	0	0	0
1410	Archaea	Crenarchaeota	Bathyarchaeia	NA	NA	NA	ASV_ 8566	0	0	24	39	0	0	0	0	0	0	0	0	0	0	7.66359e-05	0.000151502	0	0	0	0	0	0	0	0	1.90115e-05	0	0	0	1	0	0	0	0	0	0	0	0	1	0	0	0	0
1411	Archaea	Crenarchaeota	Bathyarchaeia	NA	NA	NA	ASV_ 8567	0	0	18	30	0	0	0	0	0	0	0	0	0	0	5.7477e-05	0.00011654	0	0	0	0	0	0	0	0	1.45014e-05	0	0	0	1	0	0	0	0	0	0	0	0	1	0	0	0	0
1412	Bacteria	Sva0485	NA	NA	NA	NA	ASV_ 862	0	0	47	0	0	0	0	0	0	0	0	0	0	0	0.000150079	0	0	0	0	0	0	0	0	0	1.25066e-05	0	0	1	0	0	0	0	0	0	0	0	0	1	0	0	0	0
1413	Bacteria	Planctomycetota	Planctomycetes	Pirellulales	Pirellulaceae	NA	ASV_ 8664	0	18	0	0	0	0	0	0	0	0	0	0	0	0.00010302	0	0	0	0	0	0	0	0	0	0	8.58497e-06	0	1	0	0	0	0	0	0	0	0	0	0	1	0	0	0	0
1414	Bacteria	Verrucomicrobiota	Verrucomicrobiae	Chthoniobacterales	Terrimicrobiaceae	Terrimicrobium	ASV_ 875	53	0	21	18	0	0	0	0	0	0	0	0	0.000248328	0	6.70564e-05	6.99241e-05	0	0	0	0	0	0	0	0	3.21091e-05	1	0	0	0	0	0	0	0	0	0	0	0	1	0	0	0	0
1415	Bacteria	Proteobacteria	Gammaproteobacteria	Burkholderiales	Rhodocyclaceae	NA	ASV_ 8825	17	21	0	0	0	0	0	0	0	0	0	0	7.96525e-05	0.00012019	0	0	0	0	0	0	0	0	0	0	1.66535e-05	0	1	0	0	0	0	0	0	0	0	0	0	1	0	0	0	0
1416	Bacteria	Bacteroidota	Kapabacteria	Kapabacteriales	NA	NA	ASV_ 8828	0	0	36	24	0	0	0	0	0	0	0	0	0	0	0.000114954	9.32321e-05	0	0	0	0	0	0	0	0	1.73488e-05	0	0	1	0	0	0	0	0	0	0	0	0	1	0	0	0	0
1417	Bacteria	Planctomycetota	Planctomycetes	Planctomycetales	Rubinisphaeraceae	SH-PL14	ASV_ 888	34	0	0	0	27	0	67	42	0	25	356	262	0.000159305	0	0	0	0.000105917	0	0.000215363	0.000114635	0	8.3612e-05	0.000967867	0.000703208	0.000195826	1	0	0	0	1	0	1	1	0	0	1	1	1	0	0	0	0
1418	Bacteria	NA	NA	NA	NA	NA	ASV_ 8893	40	0	0	0	6	0	0	0	0	0	0	0	0.000187418	0	0	0	2.35371e-05	0	0	0	0	0	0	0	1.75796e-05	1	0	0	0	0	0	0	0	0	0	0	0	1	0	0	0	0
1419	Archaea	Crenarchaeota	Bathyarchaeia	NA	NA	NA	ASV_ 8896	3	19	1	0	23	0	0	9	2	0	0	2	1.40563e-05	0.000108743	3.19316e-06	0	9.02254e-05	0	0	2.45646e-05	6.35805e-06	0	0	5.368e-06	2.10424e-05	0	1	0	0	0	0	0	0	0	0	0	0	1	0	0	0	0
1420	Bacteria	Schekmanbacteria	NA	NA	NA	NA	ASV_ 8991	13	18	0	0	0	0	0	27	0	0	0	0	6.09108e-05	0.00010302	0	0	0	0	0	7.36938e-05	0	0	0	0	1.9802e-05	0	1	0	0	0	0	0	0	0	0	0	0	1	0	0	0	0
1421	Archaea	Crenarchaeota	Bathyarchaeia	NA	NA	NA	ASV_ 8994	0	0	0	43	0	0	0	0	0	0	0	0	0	0	0	0.000167041	0	0	0	0	0	0	0	0	1.39201e-05	0	0	0	1	0	0	0	0	0	0	0	0	1	0	0	0	0
1422	Bacteria	Chloroflexi	Chloroflexia	Chloroflexales	Chloroflexaceae	Chloronema	ASV_ 9077	17	34	0	0	0	0	0	0	0	0	0	0	7.96525e-05	0.000194593	0	0	0	0	0	0	0	0	0	0	2.28538e-05	0	1	0	0	0	0	0	0	0	0	0	0	1	0	0	0	0
1423	Bacteria	Bdellovibrionota	Bdellovibrionia	Bacteriovoracales	Bacteriovoracaceae	Peredibacter	ASV_ 9079	0	22	0	0	0	0	0	0	0	0	0	0	0	0.000125913	0	0	0	0	0	0	0	0	0	0	1.04927e-05	0	1	0	0	0	0	0	0	0	0	0	0	1	0	0	0	0
1424	Archaea	Aenigmarchaeota	Aenigmarchaeia	Aenigmarchaeales	NA	NA	ASV_ 9082	0	0	0	28	0	0	0	0	0	0	0	0	0	0	0	0.000108771	0	0	0	0	0	0	0	0	9.06423e-06	0	0	0	1	0	0	0	0	0	0	0	0	1	0	0	0	0
1425	Bacteria	Chloroflexi	JG30-KF-CM66	NA	NA	NA	ASV_ 9184	27	13	0	0	7	5	0	0	0	0	0	0	0.000126507	7.44031e-05	0	0	2.74599e-05	1.9529e-05	0	0	0	0	0	0	2.06582e-05	1	0	0	0	0	0	0	0	0	0	0	0	1	0	0	0	0
1426	Bacteria	NA	NA	NA	NA	NA	ASV_ 9186	0	0	56	0	0	0	0	0	0	0	0	0	0	0	0.000178817	0	0	0	0	0	0	0	0	0	1.49014e-05	0	0	1	0	0	0	0	0	0	0	0	0	1	0	0	0	0
1427	Archaea	Crenarchaeota	Bathyarchaeia	NA	NA	NA	ASV_ 9187	0	0	34	22	0	0	0	0	0	0	0	0	0	0	0.000108568	8.54628e-05	0	0	0	0	0	0	0	0	1.61692e-05	0	0	1	0	0	0	0	0	0	0	0	0	1	0	0	0	0
1428	Archaea	Hadarchaeota	Hadarchaeia	Hadarchaeales	NA	NA	ASV_ 9272	0	0	0	42	0	0	0	0	0	0	0	0	0	0	0	0.000163156	0	0	0	0	0	0	0	0	1.35964e-05	0	0	0	1	0	0	0	0	0	0	0	0	1	0	0	0	0
1429	Bacteria	Desulfobacterota	Desulfomonilia	Desulfomonilales	Desulfomonilaceae	Desulfomonile	ASV_ 9426	0	0	35	18	0	0	0	0	0	0	0	0	0	0	0.000111761	6.99241e-05	0	0	0	0	0	0	0	0	1.51404e-05	0	0	1	0	0	0	0	0	0	0	0	0	1	0	0	0	0
1430	Bacteria	Chloroflexi	Chloroflexia	Chloroflexales	Chloroflexaceae	Oscillochloris	ASV_ 9633	51	0	0	0	0	0	0	0	0	0	0	0	0.000238958	0	0	0	0	0	0	0	0	0	0	0	1.99131e-05	1	0	0	0	0	0	0	0	0	0	0	0	1	0	0	0	0
1431	Bacteria	Chloroflexi	Anaerolineae	SBR1031	A4b	NA	ASV_ 9634	37	14	0	0	0	0	0	0	0	0	0	0	0.000173361	8.01264e-05	0	0	0	0	0	0	0	0	0	0	2.1124e-05	1	0	0	0	0	0	0	0	0	0	0	0	1	0	0	0	0
1432	Bacteria	Gemmatimonadota	BD2-11 terrestrial group	NA	NA	NA	ASV_ 9637	20	31	0	0	0	0	0	0	0	0	0	0	9.37089e-05	0.000177423	0	0	0	0	0	0	0	0	0	0	2.25943e-05	0	1	0	0	0	0	0	0	0	0	0	0	1	0	0	0	0
1433	Bacteria	Chloroflexi	Anaerolineae	Anaerolineales	Anaerolineaceae	NA	ASV_ 9639	9	19	0	0	0	0	0	0	0	0	8	15	4.2169e-05	0.000108743	0	0	0	0	0	0	0	0	2.17498e-05	4.026e-05	1.77435e-05	0	1	0	0	0	0	0	0	0	0	0	0	1	0	0	0	0
1434	Bacteria	Planctomycetota	Planctomycetes	Gemmatales	Gemmataceae	Gemmata	ASV_ 972	18	22	0	0	9	0	228	161	55	64	125	76	8.4338e-05	0.000125913	0	0	3.53056e-05	0	0.000732879	0.000439433	0.000174846	0.000214047	0.000339841	0.000203984	0.000195882	0	1	0	0	0	0	1	1	1	1	1	1	1	0	0	0	0
1435	Bacteria	Firmicutes	Clostridia	Lachnospirales	Lachnospiraceae	NA	ASV_ 9722	0	0	32	18	0	0	0	0	0	0	0	0	0	0	0.000102181	6.99241e-05	0	0	0	0	0	0	0	0	1.43421e-05	0	0	1	0	0	0	0	0	0	0	0	0	1	0	0	0	0
1436	Bacteria	Proteobacteria	Gammaproteobacteria	CCM19a	NA	NA	ASV_ 9795	34	13	0	0	0	0	0	0	0	0	0	2	0.000159305	7.44031e-05	0	0	0	0	0	0	0	0	0	5.368e-06	1.9923e-05	1	0	0	0	0	0	0	0	0	0	0	0	1	0	0	0	0
1437	Bacteria	Proteobacteria	Alphaproteobacteria	Caulobacterales	Hyphomonadaceae	SWB02	ASV_ 9796	25	0	0	0	0	0	0	0	0	0	0	0	0.000117136	0	0	0	0	0	0	0	0	0	0	0	9.76134e-06	1	0	0	0	0	0	0	0	0	0	0	0	1	0	0	0	0
1438	Bacteria	Proteobacteria	Alphaproteobacteria	Micavibrionales	Micavibrionaceae	NA	ASV_ 9798	8	41	0	0	0	0	0	0	0	0	0	0	3.74835e-05	0.000234656	0	0	0	0	0	0	0	0	0	0	2.26783e-05	0	1	0	0	0	0	0	0	0	0	0	0	1	0	0	0	0
1439	Bacteria	Latescibacterota	Latescibacteria	Latescibacterales	Latescibacteraceae	NA	ASV_ 98	15	11	39	25	69	48	24	25	93	177	48	96	7.02816e-05	6.29564e-05	0.000124533	9.71168e-05	0.000270676	0.000187478	7.71451e-05	6.8235e-05	0.000295649	0.000591973	0.000130499	0.000257664	0.000186184	0	0	1	0	1	1	0	0	1	1	1	1	1	0	0	0	0
1440	Archaea	Crenarchaeota	Bathyarchaeia	NA	NA	NA	ASV_ 9801	0	0	49	0	0	0	0	0	0	0	0	0	0	0	0.000156465	0	0	0	0	0	0	0	0	0	1.30388e-05	0	0	1	0	0	0	0	0	0	0	0	0	1	0	0	0	0
1441	Bacteria	Verrucomicrobiota	Verrucomicrobiae	Opitutales	Puniceicoccaceae	Verruc-01	ASV_ 9887	28	15	0	0	0	0	0	0	0	0	0	0	0.000131192	8.58497e-05	0	0	0	0	0	0	0	0	0	0	1.80868e-05	1	0	0	0	0	0	0	0	0	0	0	0	1	0	0	0	0
1442	Bacteria	Proteobacteria	Alphaproteobacteria	Rhodospirillales	Magnetospirillaceae	NA	ASV_ 9972	0	29	0	0	0	0	0	0	0	0	0	18	0	0.000165976	0	0	0	0	0	0	0	0	0	4.8312e-05	1.78573e-05	0	1	0	0	0	0	0	0	0	0	0	0	1	0	0	0	0
1443	Archaea	Crenarchaeota	Bathyarchaeia	NA	NA	NA	ASV_ 9977	0	0	18	29	0	0	0	0	0	0	0	0	0	0	5.7477e-05	0.000112655	0	0	0	0	0	0	0	0	1.41777e-05	0	0	0	1	0	0	0	0	0	0	0	0	1	0	0	0	0
1444	Bacteria	Cyanobacteria	Cyanobacteria	NA	NA	NA	ASV_ 1	0	0	0	0	0	0	0	0	0	0	0	0	0	0	0	0	0	0	0	0	0	0	0	0	0	0	0	0	0	0	0	0	0	0	0	0	0	0	0	0	0	0
1445	Bacteria	Verrucomicrobiota	Kiritimatiellae	WCHB1-41	NA	NA	ASV_ 10000	0	0	0	0	0	0	0	0	0	0	0	0	0	0	0	0	0	0	0	0	0	0	0	0	0	0	0	0	0	0	0	0	0	0	0	0	0	0	0	0	0	0
1446	Bacteria	Desulfobacterota	Desulfovibrionia	Desulfovibrionales	Desulfovibrionaceae	Desulfovibrio	ASV_ 10001	0	0	0	0	0	0	0	0	0	0	0	0	0	0	0	0	0	0	0	0	0	0	0	0	0	0	0	0	0	0	0	0	0	0	0	0	0	0	0	0	0	0
1447	Archaea	Nanoarchaeota	Nanoarchaeia	Woesearchaeales	SCGC AAA286-E23	NA	ASV_ 10002	0	0	0	0	0	0	0	0	0	0	0	0	0	0	0	0	0	0	0	0	0	0	0	0	0	0	0	0	0	0	0	0	0	0	0	0	0	0	0	0	0	0
1448	Bacteria	Planctomycetota	vadinHA49	NA	NA	NA	ASV_ 10003	0	0	0	0	0	0	0	0	0	0	0	0	0	0	0	0	0	0	0	0	0	0	0	0	0	0	0	0	0	0	0	0	0	0	0	0	0	0	0	0	0	0
1449	Archaea	Thermoplasmatota	Thermoplasmata	Marine Benthic Group D and DHVEG-1	NA	NA	ASV_ 10004	0	0	0	0	0	0	0	0	0	0	0	0	0	0	0	0	0	0	0	0	0	0	0	0	0	0	0	0	0	0	0	0	0	0	0	0	0	0	0	0	0	0
1450	Bacteria	NA	NA	NA	NA	NA	ASV_ 10005	0	0	0	0	0	0	0	0	0	0	0	0	0	0	0	0	0	0	0	0	0	0	0	0	0	0	0	0	0	0	0	0	0	0	0	0	0	0	0	0	0	0
1451	Bacteria	Desulfobacterota	Desulfobulbia	Desulfobulbales	Desulfurivibrionaceae	MSBL7	ASV_ 10006	0	0	0	0	0	0	0	0	0	0	0	0	0	0	0	0	0	0	0	0	0	0	0	0	0	0	0	0	0	0	0	0	0	0	0	0	0	0	0	0	0	0
1452	Bacteria	Desulfobacterota	Desulfobacteria	Desulfobacterales	Desulfosarcinaceae	SEEP-SRB1	ASV_ 10007	0	0	0	0	0	0	0	0	0	0	0	0	0	0	0	0	0	0	0	0	0	0	0	0	0	0	0	0	0	0	0	0	0	0	0	0	0	0	0	0	0	0
1453	Bacteria	Chloroflexi	Dehalococcoidia	GIF9	AB-539-J10	SCGC-AB-539-J10	ASV_ 10008	0	0	0	0	0	0	0	0	0	0	0	0	0	0	0	0	0	0	0	0	0	0	0	0	0	0	0	0	0	0	0	0	0	0	0	0	0	0	0	0	0	0
1454	Bacteria	Chloroflexi	Anaerolineae	SBR1031	NA	NA	ASV_ 10009	0	0	0	0	0	0	0	0	0	0	0	0	0	0	0	0	0	0	0	0	0	0	0	0	0	0	0	0	0	0	0	0	0	0	0	0	0	0	0	0	0	0
1455	Bacteria	Acidobacteriota	Subgroup 22	NA	NA	NA	ASV_ 1001	0	0	0	0	0	0	0	0	0	0	0	0	0	0	0	0	0	0	0	0	0	0	0	0	0	0	0	0	0	0	0	0	0	0	0	0	0	0	0	0	0	0
1456	Bacteria	Chloroflexi	Anaerolineae	NA	NA	NA	ASV_ 10010	0	0	0	0	0	0	0	0	0	0	0	0	0	0	0	0	0	0	0	0	0	0	0	0	0	0	0	0	0	0	0	0	0	0	0	0	0	0	0	0	0	0
1457	Bacteria	Planctomycetota	Phycisphaerae	MSBL9	SG8-4	NA	ASV_ 10011	0	0	0	0	0	0	0	0	0	0	0	0	0	0	0	0	0	0	0	0	0	0	0	0	0	0	0	0	0	0	0	0	0	0	0	0	0	0	0	0	0	0
1458	Bacteria	Chloroflexi	Dehalococcoidia	GIF9	NA	NA	ASV_ 10012	0	0	0	0	0	0	0	0	0	0	0	0	0	0	0	0	0	0	0	0	0	0	0	0	0	0	0	0	0	0	0	0	0	0	0	0	0	0	0	0	0	0
1459	Bacteria	Chloroflexi	Anaerolineae	RBG-13-54-9	NA	NA	ASV_ 10013	0	0	0	0	0	0	0	0	0	0	0	0	0	0	0	0	0	0	0	0	0	0	0	0	0	0	0	0	0	0	0	0	0	0	0	0	0	0	0	0	0	0
1460	Bacteria	Bacteroidota	Bacteroidia	Bacteroidales	Bacteroidetes BD2-2	NA	ASV_ 10014	0	0	0	0	0	0	0	0	0	0	0	0	0	0	0	0	0	0	0	0	0	0	0	0	0	0	0	0	0	0	0	0	0	0	0	0	0	0	0	0	0	0
1461	Bacteria	Sva0485	NA	NA	NA	NA	ASV_ 10015	0	0	0	0	0	0	0	0	0	0	0	0	0	0	0	0	0	0	0	0	0	0	0	0	0	0	0	0	0	0	0	0	0	0	0	0	0	0	0	0	0	0
1462	Bacteria	Cyanobacteria	Cyanobacteria	Chloroplast	NA	NA	ASV_ 10016	0	0	0	0	0	0	0	0	0	0	0	0	0	0	0	0	0	0	0	0	0	0	0	0	0	0	0	0	0	0	0	0	0	0	0	0	0	0	0	0	0	0
1463	Archaea	Micrarchaeota	Micrarchaeia	Micrarchaeales	NA	NA	ASV_ 10017	0	0	0	0	0	0	0	0	0	0	0	0	0	0	0	0	0	0	0	0	0	0	0	0	0	0	0	0	0	0	0	0	0	0	0	0	0	0	0	0	0	0
1464	Bacteria	Verrucomicrobiota	Lentisphaeria	Oligosphaerales	Lenti-02	NA	ASV_ 10018	0	0	0	0	0	0	0	0	0	0	0	0	0	0	0	0	0	0	0	0	0	0	0	0	0	0	0	0	0	0	0	0	0	0	0	0	0	0	0	0	0	0
1465	Bacteria	Bacteroidota	Bacteroidia	Cytophagales	Cyclobacteriaceae	NA	ASV_ 10019	0	0	0	0	0	0	0	0	0	0	0	0	0	0	0	0	0	0	0	0	0	0	0	0	0	0	0	0	0	0	0	0	0	0	0	0	0	0	0	0	0	0
1466	Bacteria	Planctomycetota	Phycisphaerae	MSBL9	SG8-4	NA	ASV_ 10020	0	0	0	0	0	0	0	0	0	0	0	0	0	0	0	0	0	0	0	0	0	0	0	0	0	0	0	0	0	0	0	0	0	0	0	0	0	0	0	0	0	0
1467	Bacteria	Verrucomicrobiota	Kiritimatiellae	WCHB1-41	NA	NA	ASV_ 10021	0	0	0	0	0	0	0	0	0	0	0	0	0	0	0	0	0	0	0	0	0	0	0	0	0	0	0	0	0	0	0	0	0	0	0	0	0	0	0	0	0	0
1468	Archaea	Crenarchaeota	Bathyarchaeia	NA	NA	NA	ASV_ 10022	0	0	0	0	0	0	0	0	0	0	0	0	0	0	0	0	0	0	0	0	0	0	0	0	0	0	0	0	0	0	0	0	0	0	0	0	0	0	0	0	0	0
1469	Bacteria	Actinobacteriota	Thermoleophilia	Gaiellales	NA	NA	ASV_ 10023	0	0	0	0	0	0	0	0	0	0	0	0	0	0	0	0	0	0	0	0	0	0	0	0	0	0	0	0	0	0	0	0	0	0	0	0	0	0	0	0	0	0
1470	Bacteria	Sva0485	NA	NA	NA	NA	ASV_ 10024	0	0	0	0	0	0	0	0	0	0	0	0	0	0	0	0	0	0	0	0	0	0	0	0	0	0	0	0	0	0	0	0	0	0	0	0	0	0	0	0	0	0
1471	Archaea	Crenarchaeota	Bathyarchaeia	NA	NA	NA	ASV_ 10025	0	0	0	0	0	0	0	0	0	0	0	0	0	0	0	0	0	0	0	0	0	0	0	0	0	0	0	0	0	0	0	0	0	0	0	0	0	0	0	0	0	0
1472	Bacteria	Chloroflexi	Dehalococcoidia	H3.93	NA	NA	ASV_ 10026	0	0	0	0	0	0	0	0	0	0	0	0	0	0	0	0	0	0	0	0	0	0	0	0	0	0	0	0	0	0	0	0	0	0	0	0	0	0	0	0	0	0
1473	Bacteria	Bacteroidota	Bacteroidia	Bacteroidales	SB-5	NA	ASV_ 10027	0	0	0	0	0	0	0	0	0	0	0	0	0	0	0	0	0	0	0	0	0	0	0	0	0	0	0	0	0	0	0	0	0	0	0	0	0	0	0	0	0	0
1474	Bacteria	Bacteroidota	Bacteroidia	Sphingobacteriales	Lentimicrobiaceae	NA	ASV_ 10028	0	0	0	0	0	0	0	0	0	0	0	0	0	0	0	0	0	0	0	0	0	0	0	0	0	0	0	0	0	0	0	0	0	0	0	0	0	0	0	0	0	0
1475	Bacteria	Planctomycetota	Planctomycetes	Pirellulales	Pirellulaceae	Blastopirellula	ASV_ 10029	0	0	0	0	0	0	0	0	0	0	0	0	0	0	0	0	0	0	0	0	0	0	0	0	0	0	0	0	0	0	0	0	0	0	0	0	0	0	0	0	0	0
1476	Bacteria	Desulfobacterota	Desulfobacteria	Desulfobacterales	Desulfosarcinaceae	SEEP-SRB1	ASV_ 10030	0	0	0	0	0	0	0	0	0	0	0	0	0	0	0	0	0	0	0	0	0	0	0	0	0	0	0	0	0	0	0	0	0	0	0	0	0	0	0	0	0	0
1477	Bacteria	Chloroflexi	Anaerolineae	Anaerolineales	Anaerolineaceae	NA	ASV_ 10031	0	0	0	0	0	0	0	0	0	0	0	0	0	0	0	0	0	0	0	0	0	0	0	0	0	0	0	0	0	0	0	0	0	0	0	0	0	0	0	0	0	0
1478	Bacteria	Planctomycetota	NA	NA	NA	NA	ASV_ 10032	0	0	0	0	0	0	0	0	0	0	0	0	0	0	0	0	0	0	0	0	0	0	0	0	0	0	0	0	0	0	0	0	0	0	0	0	0	0	0	0	0	0
1479	Bacteria	Planctomycetota	Phycisphaerae	Phycisphaerales	AKAU3564 sediment group	NA	ASV_ 10033	0	0	0	0	0	0	0	0	0	0	0	0	0	0	0	0	0	0	0	0	0	0	0	0	0	0	0	0	0	0	0	0	0	0	0	0	0	0	0	0	0	0
1480	Bacteria	Proteobacteria	Alphaproteobacteria	Rhizobiales	Devosiaceae	Devosia	ASV_ 10034	0	0	0	0	0	0	0	0	0	0	0	0	0	0	0	0	0	0	0	0	0	0	0	0	0	0	0	0	0	0	0	0	0	0	0	0	0	0	0	0	0	0
1481	Bacteria	Proteobacteria	Gammaproteobacteria	NA	NA	NA	ASV_ 10035	0	0	0	0	0	0	0	0	0	0	0	0	0	0	0	0	0	0	0	0	0	0	0	0	0	0	0	0	0	0	0	0	0	0	0	0	0	0	0	0	0	0
1482	Bacteria	Chloroflexi	Dehalococcoidia	GIF9	NA	NA	ASV_ 10036	0	0	0	0	0	0	0	0	0	0	0	0	0	0	0	0	0	0	0	0	0	0	0	0	0	0	0	0	0	0	0	0	0	0	0	0	0	0	0	0	0	0
1483	Archaea	Nanoarchaeota	Nanoarchaeia	Woesearchaeales	NA	NA	ASV_ 10037	0	0	0	0	0	0	0	0	0	0	0	0	0	0	0	0	0	0	0	0	0	0	0	0	0	0	0	0	0	0	0	0	0	0	0	0	0	0	0	0	0	0
1484	Bacteria	NA	NA	NA	NA	NA	ASV_ 10038	0	0	0	0	0	0	0	0	0	0	0	0	0	0	0	0	0	0	0	0	0	0	0	0	0	0	0	0	0	0	0	0	0	0	0	0	0	0	0	0	0	0
1485	Bacteria	NA	NA	NA	NA	NA	ASV_ 10039	0	0	0	0	0	0	0	0	0	0	0	0	0	0	0	0	0	0	0	0	0	0	0	0	0	0	0	0	0	0	0	0	0	0	0	0	0	0	0	0	0	0
1486	Bacteria	NA	NA	NA	NA	NA	ASV_ 10040	0	0	0	0	0	0	0	0	0	0	0	0	0	0	0	0	0	0	0	0	0	0	0	0	0	0	0	0	0	0	0	0	0	0	0	0	0	0	0	0	0	0
1487	Bacteria	Sva0485	NA	NA	NA	NA	ASV_ 10041	0	0	0	0	0	0	0	0	0	0	0	0	0	0	0	0	0	0	0	0	0	0	0	0	0	0	0	0	0	0	0	0	0	0	0	0	0	0	0	0	0	0
1488	Bacteria	Patescibacteria	ABY1	Candidatus Falkowbacteria	NA	NA	ASV_ 10042	0	0	0	0	0	0	0	0	0	0	0	0	0	0	0	0	0	0	0	0	0	0	0	0	0	0	0	0	0	0	0	0	0	0	0	0	0	0	0	0	0	0
1489	Bacteria	Chloroflexi	Anaerolineae	Anaerolineales	Anaerolineaceae	RBG-16-58-14	ASV_ 10043	0	0	0	0	0	0	0	0	0	0	0	0	0	0	0	0	0	0	0	0	0	0	0	0	0	0	0	0	0	0	0	0	0	0	0	0	0	0	0	0	0	0
1490	Bacteria	Acetothermia	Acetothermiia	NA	NA	NA	ASV_ 10044	0	0	0	0	0	0	0	0	0	0	0	0	0	0	0	0	0	0	0	0	0	0	0	0	0	0	0	0	0	0	0	0	0	0	0	0	0	0	0	0	0	0
1491	Bacteria	Proteobacteria	Alphaproteobacteria	Dongiales	Dongiaceae	Dongia	ASV_ 10045	0	0	0	0	0	0	0	0	0	0	0	0	0	0	0	0	0	0	0	0	0	0	0	0	0	0	0	0	0	0	0	0	0	0	0	0	0	0	0	0	0	0
1492	Bacteria	Acidobacteriota	Blastocatellia	2024-11-01	NA	NA	ASV_ 10046	0	0	0	0	0	0	0	0	0	0	0	0	0	0	0	0	0	0	0	0	0	0	0	0	0	0	0	0	0	0	0	0	0	0	0	0	0	0	0	0	0	0
1493	Bacteria	Bacteroidota	Bacteroidia	Flavobacteriales	Flavobacteriaceae	Flavobacterium	ASV_ 10047	0	0	0	0	0	0	0	0	0	0	0	0	0	0	0	0	0	0	0	0	0	0	0	0	0	0	0	0	0	0	0	0	0	0	0	0	0	0	0	0	0	0
1494	Bacteria	Chloroflexi	Anaerolineae	SBR1031	A4b	NA	ASV_ 10048	0	0	0	0	0	0	0	0	0	0	0	0	0	0	0	0	0	0	0	0	0	0	0	0	0	0	0	0	0	0	0	0	0	0	0	0	0	0	0	0	0	0
1495	Bacteria	Proteobacteria	Gammaproteobacteria	Burkholderiales	Comamonadaceae	Ottowia	ASV_ 10049	0	0	0	0	0	0	0	0	0	0	0	0	0	0	0	0	0	0	0	0	0	0	0	0	0	0	0	0	0	0	0	0	0	0	0	0	0	0	0	0	0	0
1496	Bacteria	Chloroflexi	Anaerolineae	NA	NA	NA	ASV_ 10050	0	0	0	0	0	0	0	0	0	0	0	0	0	0	0	0	0	0	0	0	0	0	0	0	0	0	0	0	0	0	0	0	0	0	0	0	0	0	0	0	0	0
1497	Bacteria	Proteobacteria	Alphaproteobacteria	Rhizobiales	Rhizobiales Incertae Sedis	Bauldia	ASV_ 10051	0	0	0	0	0	0	0	0	0	0	0	0	0	0	0	0	0	0	0	0	0	0	0	0	0	0	0	0	0	0	0	0	0	0	0	0	0	0	0	0	0	0
1498	Bacteria	Calditrichota	Calditrichia	Calditrichales	Calditrichaceae	NA	ASV_ 10052	0	0	0	0	0	0	0	0	0	0	0	0	0	0	0	0	0	0	0	0	0	0	0	0	0	0	0	0	0	0	0	0	0	0	0	0	0	0	0	0	0	0
1499	Bacteria	Bacteroidota	Bacteroidia	Bacteroidales	SB-5	NA	ASV_ 10053	0	0	0	0	0	0	0	0	0	0	0	0	0	0	0	0	0	0	0	0	0	0	0	0	0	0	0	0	0	0	0	0	0	0	0	0	0	0	0	0	0	0
1500	Bacteria	Bacteroidota	Bacteroidia	Chitinophagales	Chitinophagaceae	Edaphobaculum	ASV_ 10054	0	0	0	0	0	0	0	0	0	0	0	0	0	0	0	0	0	0	0	0	0	0	0	0	0	0	0	0	0	0	0	0	0	0	0	0	0	0	0	0	0	0
1501	Bacteria	Verrucomicrobiota	Verrucomicrobiae	Verrucomicrobiales	Rubritaleaceae	Luteolibacter	ASV_ 10055	0	0	0	0	0	0	0	0	0	0	0	0	0	0	0	0	0	0	0	0	0	0	0	0	0	0	0	0	0	0	0	0	0	0	0	0	0	0	0	0	0	0
1502	Bacteria	Proteobacteria	Gammaproteobacteria	Burkholderiales	Comamonadaceae	Pelomonas	ASV_ 10056	0	0	0	0	0	0	0	0	0	0	0	0	0	0	0	0	0	0	0	0	0	0	0	0	0	0	0	0	0	0	0	0	0	0	0	0	0	0	0	0	0	0
	Bacteria	Verrucomicrobiota	Verrucomicrobiae	Verrucomicrobiales	Verrucomicrobiaceae	NA	ASV_ 10057	0	0	0	0	0	0	0	0	0	0	0	0	0	0	0	0	0	0	0	0	0	0	0	0	0	0	0	0	0	0	0	0	0	0	0	0	0	0	0	0	0	0
	Bacteria	Chloroflexi	Dehalococcoidia	GIF3	NA	NA	ASV_ 10058	0	0	0	0	0	0	0	0	0	0	0	0	0	0	0	0	0	0	0	0	0	0	0	0	0	0	0	0	0	0	0	0	0	0	0	0	0	0	0	0	0	0
	Bacteria	Planctomycetota	Planctomycetes	Gemmatales	Gemmataceae	Fimbriiglobus	ASV_ 10059	0	0	0	0	0	0	0	0	0	0	0	0	0	0	0	0	0	0	0	0	0	0	0	0	0	0	0	0	0	0	0	0	0	0	0	0	0	0	0	0	0	0
	Bacteria	Proteobacteria	Gammaproteobacteria	Burkholderiales	Sutterellaceae	NA	ASV_ 10060	0	0	0	0	0	0	0	0	0	0	0	0	0	0	0	0	0	0	0	0	0	0	0	0	0	0	0	0	0	0	0	0	0	0	0	0	0	0	0	0	0	0
	Bacteria	Fibrobacterota	Fibrobacteria	Fibrobacterales	Fibrobacteraceae	NA	ASV_ 10061	0	0	0	0	0	0	0	0	0	0	0	0	0	0	0	0	0	0	0	0	0	0	0	0	0	0	0	0	0	0	0	0	0	0	0	0	0	0	0	0	0	0
	Bacteria	Proteobacteria	Alphaproteobacteria	Caulobacterales	Hyphomonadaceae	SWB02	ASV_ 10062	0	0	0	0	0	0	0	0	0	0	0	0	0	0	0	0	0	0	0	0	0	0	0	0	0	0	0	0	0	0	0	0	0	0	0	0	0	0	0	0	0	0
	Bacteria	Gemmatimonadota	BD2-11 terrestrial group	NA	NA	NA	ASV_ 10063	0	0	0	0	0	0	0	0	0	0	0	0	0	0	0	0	0	0	0	0	0	0	0	0	0	0	0	0	0	0	0	0	0	0	0	0	0	0	0	0	0	0
	Bacteria	Acidobacteriota	Vicinamibacteria	Vicinamibacterales	NA	NA	ASV_ 10064	0	0	0	0	0	0	0	0	0	0	0	0	0	0	0	0	0	0	0	0	0	0	0	0	0	0	0	0	0	0	0	0	0	0	0	0	0	0	0	0	0	0
	Bacteria	Bdellovibrionota	Oligoflexia	0319-6G20	NA	NA	ASV_ 10065	0	0	0	0	0	0	0	0	0	0	0	0	0	0	0	0	0	0	0	0	0	0	0	0	0	0	0	0	0	0	0	0	0	0	0	0	0	0	0	0	0	0
	Bacteria	Armatimonadota	NA	NA	NA	NA	ASV_ 10066	0	0	0	0	0	0	0	0	0	0	0	0	0	0	0	0	0	0	0	0	0	0	0	0	0	0	0	0	0	0	0	0	0	0	0	0	0	0	0	0	0	0
	Bacteria	WS1	NA	NA	NA	NA	ASV_ 10067	0	0	0	0	0	0	0	0	0	0	0	0	0	0	0	0	0	0	0	0	0	0	0	0	0	0	0	0	0	0	0	0	0	0	0	0	0	0	0	0	0	0
	Bacteria	Chloroflexi	Dehalococcoidia	t0.6.f	NA	NA	ASV_ 10068	0	0	0	0	0	0	0	0	0	0	0	0	0	0	0	0	0	0	0	0	0	0	0	0	0	0	0	0	0	0	0	0	0	0	0	0	0	0	0	0	0	0
	Bacteria	Proteobacteria	Gammaproteobacteria	CCD24	NA	NA	ASV_ 10069	0	0	0	0	0	0	0	0	0	0	0	0	0	0	0	0	0	0	0	0	0	0	0	0	0	0	0	0	0	0	0	0	0	0	0	0	0	0	0	0	0	0
	Bacteria	Myxococcota	Polyangia	Polyangiales	Polyangiaceae	Polyangium	ASV_ 1007	0	0	0	0	0	0	0	0	0	0	1271	283	0	0	0	0	0	0	0	0	0	0	0.0034555	0.000759572	0.000351256	0	0	0	0	0	0	0	0	0	0	1	1	0	0	0	0	0
	Bacteria	Chloroflexi	Anaerolineae	SBR1031	A4b	NA	ASV_ 10070	0	0	0	0	0	0	0	0	0	0	0	0	0	0	0	0	0	0	0	0	0	0	0	0	0	0	0	0	0	0	0	0	0	0	0	0	0	0	0	0	0	0
	Bacteria	Myxococcota	Polyangia	Polyangiales	Phaselicystidaceae	Phaselicystis	ASV_ 10071	0	0	0	0	0	0	0	0	0	0	0	0	0	0	0	0	0	0	0	0	0	0	0	0	0	0	0	0	0	0	0	0	0	0	0	0	0	0	0	0	0	0
	Bacteria	Proteobacteria	Alphaproteobacteria	Rickettsiales	SM2D12	NA	ASV_ 10072	0	0	0	0	0	0	0	0	0	0	0	0	0	0	0	0	0	0	0	0	0	0	0	0	0	0	0	0	0	0	0	0	0	0	0	0	0	0	0	0	0	0
	Bacteria	Bacteroidota	Bacteroidia	Chitinophagales	Chitinophagaceae	Flavihumibacter	ASV_ 10073	0	0	0	0	0	0	0	0	0	0	0	0	0	0	0	0	0	0	0	0	0	0	0	0	0	0	0	0	0	0	0	0	0	0	0	0	0	0	0	0	0	0
	Bacteria	Elusimicrobiota	Elusimicrobia	Lineage IV	NA	NA	ASV_ 10074	0	0	0	0	0	0	0	0	0	0	0	0	0	0	0	0	0	0	0	0	0	0	0	0	0	0	0	0	0	0	0	0	0	0	0	0	0	0	0	0	0	0
	Bacteria	Proteobacteria	Alphaproteobacteria	Rhodobacterales	Rhodobacteraceae	NA	ASV_ 10075	0	0	0	0	0	0	0	0	0	0	0	0	0	0	0	0	0	0	0	0	0	0	0	0	0	0	0	0	0	0	0	0	0	0	0	0	0	0	0	0	0	0
	Bacteria	Planctomycetota	Phycisphaerae	MSBL9	KCLunmb-38-53	NA	ASV_ 10076	0	0	0	0	0	0	8	0	0	0	3	0	0	0	0	0	0	0	2.5715e-05	0	0	0	8.15619e-06	0	2.8226e-06	0	0	0	0	0	0	0	0	0	0	0	0	0	0	0	0	0
	Bacteria	Spirochaetota	Spirochaetia	Spirochaetales	Spirochaetaceae	M2PT2-76 termite group	ASV_ 10077	0	0	0	0	0	0	0	0	0	0	0	0	0	0	0	0	0	0	0	0	0	0	0	0	0	0	0	0	0	0	0	0	0	0	0	0	0	0	0	0	0	0
	Bacteria	Proteobacteria	Alphaproteobacteria	Rickettsiales	Mitochondria	NA	ASV_ 10078	0	0	0	0	0	0	0	0	0	0	0	0	0	0	0	0	0	0	0	0	0	0	0	0	0	0	0	0	0	0	0	0	0	0	0	0	0	0	0	0	0	0
	Bacteria	Patescibacteria	Berkelbacteria	NA	NA	NA	ASV_ 10079	0	0	0	0	0	0	0	0	0	0	0	0	0	0	0	0	0	0	0	0	0	0	0	0	0	0	0	0	0	0	0	0	0	0	0	0	0	0	0	0	0	0
	Bacteria	Chloroflexi	Anaerolineae	RBG-13-54-9	NA	NA	ASV_ 1008	0	0	0	0	0	0	0	0	0	0	0	0	0	0	0	0	0	0	0	0	0	0	0	0	0	0	0	0	0	0	0	0	0	0	0	0	0	0	0	0	0	0
	Bacteria	GN01	NA	NA	NA	NA	ASV_ 10080	0	0	4	0	0	0	0	0	0	0	0	0	0	0	1.27727e-05	0	0	0	0	0	0	0	0	0	1.06439e-06	0	0	0	0	0	0	0	0	0	0	0	0	0	0	0	0	0
	Bacteria	Actinobacteriota	Thermoleophilia	Gaiellales	NA	NA	ASV_ 10081	0	0	0	11	21	0	0	0	12	0	2	0	0	0	0	4.27314e-05	8.23798e-05	0	0	0	3.81483e-05	0	5.43746e-06	0	1.40581e-05	0	0	0	0	0	0	0	0	0	0	0	0	0	0	0	0	0
	Bacteria	TA06	NA	NA	NA	NA	ASV_ 10082	0	0	0	4	0	0	0	0	0	0	0	0	0	0	0	1.55387e-05	0	0	0	0	0	0	0	0	1.29489e-06	0	0	0	0	0	0	0	0	0	0	0	0	0	0	0	0	0
	Bacteria	Planctomycetota	Planctomycetes	Gemmatales	Gemmataceae	NA	ASV_ 10083	0	0	0	0	0	0	32	8	0	0	0	0	0	0	0	0	0	0	0.00010286	2.18352e-05	0	0	0	0	1.03913e-05	0	0	0	0	0	0	1	0	0	0	0	0	0	0	0	0	0
	Bacteria	Chloroflexi	Dehalococcoidia	GIF9	AB-539-J10	SCGC-AB-539-J10	ASV_ 10084	0	0	0	0	0	0	24	19	0	0	0	0	0	0	0	0	0	0	7.71451e-05	5.18586e-05	0	0	0	0	1.07503e-05	0	0	0	0	0	0	0	0	0	0	0	0	0	0	0	0	0
	Bacteria	Desulfobacterota	NA	NA	NA	NA	ASV_ 10085	0	0	0	0	0	0	17	0	0	0	10	0	0	0	0	0	0	0	5.46445e-05	0	0	0	2.71873e-05	0	6.81931e-06	0	0	0	0	0	0	0	0	0	0	0	0	0	0	0	0	0
	Bacteria	Planctomycetota	Planctomycetes	Isosphaerales	Isosphaeraceae	NA	ASV_ 10086	0	0	0	0	0	0	15	16	0	0	0	0	0	0	0	0	0	0	4.82157e-05	4.36704e-05	0	0	0	0	7.65717e-06	0	0	0	0	0	0	0	0	0	0	0	0	0	0	0	0	0
	Bacteria	NA	NA	NA	NA	NA	ASV_ 10087	0	0	0	0	0	0	0	0	0	0	46	0	0	0	0	0	0	0	0	0	0	0	0.000125062	0	1.04218e-05	0	0	0	0	0	0	0	0	0	0	1	0	0	0	0	0	0
	Bacteria	Proteobacteria	Gammaproteobacteria	Burkholderiales	Rhodocyclaceae	NA	ASV_ 10088	0	0	0	0	0	0	0	0	0	0	26	20	0	0	0	0	0	0	0	0	0	0	7.06869e-05	5.368e-05	1.03639e-05	0	0	0	0	0	0	0	0	0	0	0	0	0	0	0	0	0
	Bacteria	Verrucomicrobiota	Omnitrophia	Omnitrophales	Omnitrophaceae	Candidatus Omnitrophus	ASV_ 10089	0	0	0	0	0	0	0	0	0	0	0	0	0	0	0	0	0	0	0	0	0	0	0	0	0	0	0	0	0	0	0	0	0	0	0	0	0	0	0	0	0	0
	Bacteria	Bacteroidota	Bacteroidia	Bacteroidales	NA	NA	ASV_ 10090	0	0	0	0	0	0	0	0	0	0	0	0	0	0	0	0	0	0	0	0	0	0	0	0	0	0	0	0	0	0	0	0	0	0	0	0	0	0	0	0	0	0
	Bacteria	Chloroflexi	Anaerolineae	SBR1031	A4b	NA	ASV_ 10091	0	0	0	0	0	0	0	0	0	0	0	0	0	0	0	0	0	0	0	0	0	0	0	0	0	0	0	0	0	0	0	0	0	0	0	0	0	0	0	0	0	0
	Bacteria	Planctomycetota	Pla4 lineage	NA	NA	NA	ASV_ 10092	0	0	0	0	0	0	0	0	0	0	0	0	0	0	0	0	0	0	0	0	0	0	0	0	0	0	0	0	0	0	0	0	0	0	0	0	0	0	0	0	0	0
	Bacteria	LCP-89	NA	NA	NA	NA	ASV_ 10093	0	0	0	0	0	0	0	0	0	0	0	0	0	0	0	0	0	0	0	0	0	0	0	0	0	0	0	0	0	0	0	0	0	0	0	0	0	0	0	0	0	0
	Archaea	Crenarchaeota	Bathyarchaeia	NA	NA	NA	ASV_ 10094	0	0	0	0	0	0	0	0	0	0	0	0	0	0	0	0	0	0	0	0	0	0	0	0	0	0	0	0	0	0	0	0	0	0	0	0	0	0	0	0	0	0
	Bacteria	Planctomycetota	Pla4 lineage	NA	NA	NA	ASV_ 10095	0	0	0	0	0	0	0	0	0	0	0	0	0	0	0	0	0	0	0	0	0	0	0	0	0	0	0	0	0	0	0	0	0	0	0	0	0	0	0	0	0	0
	Bacteria	Planctomycetota	Planctomycetes	Pirellulales	Pirellulaceae	NA	ASV_ 10096	0	0	0	0	0	0	0	0	0	0	0	0	0	0	0	0	0	0	0	0	0	0	0	0	0	0	0	0	0	0	0	0	0	0	0	0	0	0	0	0	0	0
	Bacteria	Planctomycetota	Phycisphaerae	MSBL9	SM23-30	NA	ASV_ 10097	0	0	0	0	0	0	0	0	0	0	0	0	0	0	0	0	0	0	0	0	0	0	0	0	0	0	0	0	0	0	0	0	0	0	0	0	0	0	0	0	0	0
	Bacteria	Chloroflexi	Dehalococcoidia	FW22	NA	NA	ASV_ 10098	0	0	0	0	0	0	0	0	0	0	0	0	0	0	0	0	0	0	0	0	0	0	0	0	0	0	0	0	0	0	0	0	0	0	0	0	0	0	0	0	0	0
	Archaea	Crenarchaeota	Bathyarchaeia	NA	NA	NA	ASV_ 10099	0	0	0	0	0	0	0	0	0	0	0	0	0	0	0	0	0	0	0	0	0	0	0	0	0	0	0	0	0	0	0	0	0	0	0	0	0	0	0	0	0	0
	Bacteria	Chloroflexi	Anaerolineae	Anaerolineales	Anaerolineaceae	NA	ASV_ 101	0	0	0	0	0	0	214	257	0	23	41	37	0	0	0	0	0	0	0.000687877	0.000701456	0	7.69231e-05	0.000111468	9.93081e-05	0.000139753	0	0	0	0	0	0	1	1	0	0	1	0	0	0	0	0	0
	Bacteria	Desulfobacterota	Syntrophia	Syntrophales	Syntrophaceae	Syntrophus	ASV_ 10100	0	0	0	0	0	0	0	0	0	0	0	0	0	0	0	0	0	0	0	0	0	0	0	0	0	0	0	0	0	0	0	0	0	0	0	0	0	0	0	0	0	0
	Bacteria	Verrucomicrobiota	Omnitrophia	Omnitrophales	Omnitrophaceae	Candidatus Omnitrophus	ASV_ 10101	0	0	0	0	0	0	0	0	0	0	0	0	0	0	0	0	0	0	0	0	0	0	0	0	0	0	0	0	0	0	0	0	0	0	0	0	0	0	0	0	0	0
	Bacteria	Actinobacteriota	WCHB1-81	NA	NA	NA	ASV_ 10102	0	0	0	0	0	0	0	0	0	0	0	0	0	0	0	0	0	0	0	0	0	0	0	0	0	0	0	0	0	0	0	0	0	0	0	0	0	0	0	0	0	0
	Bacteria	LCP-89	NA	NA	NA	NA	ASV_ 10103	0	0	0	0	0	0	0	0	0	0	0	0	0	0	0	0	0	0	0	0	0	0	0	0	0	0	0	0	0	0	0	0	0	0	0	0	0	0	0	0	0	0
	Bacteria	Chloroflexi	Anaerolineae	Anaerolineales	Anaerolineaceae	NA	ASV_ 10104	0	0	0	0	0	0	0	0	0	0	0	0	0	0	0	0	0	0	0	0	0	0	0	0	0	0	0	0	0	0	0	0	0	0	0	0	0	0	0	0	0	0
	Bacteria	Desulfobacterota	Desulfobacteria	Desulfobacterales	Desulfosarcinaceae	NA	ASV_ 10105	0	0	0	0	0	0	0	0	0	0	0	0	0	0	0	0	0	0	0	0	0	0	0	0	0	0	0	0	0	0	0	0	0	0	0	0	0	0	0	0	0	0
	Bacteria	Chloroflexi	Dehalococcoidia	Napoli-4B-65	NA	NA	ASV_ 10106	0	0	0	0	0	0	0	0	0	0	0	0	0	0	0	0	0	0	0	0	0	0	0	0	0	0	0	0	0	0	0	0	0	0	0	0	0	0	0	0	0	0
	Bacteria	Acidobacteriota	Subgroup 18	NA	NA	NA	ASV_ 10107	0	0	0	0	0	0	0	0	0	0	0	0	0	0	0	0	0	0	0	0	0	0	0	0	0	0	0	0	0	0	0	0	0	0	0	0	0	0	0	0	0	0
	Bacteria	Chloroflexi	Anaerolineae	RBG-13-54-9	NA	NA	ASV_ 10108	0	0	0	0	0	0	0	0	0	0	0	0	0	0	0	0	0	0	0	0	0	0	0	0	0	0	0	0	0	0	0	0	0	0	0	0	0	0	0	0	0	0
	Archaea	Nanoarchaeota	Nanoarchaeia	Woesearchaeales	NA	NA	ASV_ 10109	0	0	0	0	0	0	0	0	0	0	0	0	0	0	0	0	0	0	0	0	0	0	0	0	0	0	0	0	0	0	0	0	0	0	0	0	0	0	0	0	0	0
	Bacteria	Latescibacterota	Latescibacteria	Latescibacterales	Latescibacteraceae	NA	ASV_ 1011	0	0	9	0	0	0	0	0	0	0	0	0	0	0	2.87385e-05	0	0	0	0	0	0	0	0	0	2.39487e-06	0	0	0	0	0	0	0	0	0	0	0	0	0	0	0	0	0
	Bacteria	Acetothermia	Acetothermiia	NA	NA	NA	ASV_ 10110	0	0	0	0	0	0	0	0	0	0	0	0	0	0	0	0	0	0	0	0	0	0	0	0	0	0	0	0	0	0	0	0	0	0	0	0	0	0	0	0	0	0
	Bacteria	Proteobacteria	Gammaproteobacteria	Methylococcales	Methylococcaceae	NA	ASV_ 10111	0	0	0	0	0	0	0	0	0	0	0	0	0	0	0	0	0	0	0	0	0	0	0	0	0	0	0	0	0	0	0	0	0	0	0	0	0	0	0	0	0	0
	Archaea	Crenarchaeota	Bathyarchaeia	NA	NA	NA	ASV_ 10112	0	0	0	0	0	0	0	0	0	0	0	0	0	0	0	0	0	0	0	0	0	0	0	0	0	0	0	0	0	0	0	0	0	0	0	0	0	0	0	0	0	0
	Bacteria	LCP-89	NA	NA	NA	NA	ASV_ 10113	0	0	0	0	0	0	0	0	0	0	0	0	0	0	0	0	0	0	0	0	0	0	0	0	0	0	0	0	0	0	0	0	0	0	0	0	0	0	0	0	0	0
	Bacteria	Acidobacteriota	Thermoanaerobaculia	Thermoanaerobaculales	Thermoanaerobaculaceae	Subgroup 23	ASV_ 10114	0	0	0	0	0	0	0	0	0	0	0	0	0	0	0	0	0	0	0	0	0	0	0	0	0	0	0	0	0	0	0	0	0	0	0	0	0	0	0	0	0	0
	Bacteria	Verrucomicrobiota	Verrucomicrobiae	Pedosphaerales	Pedosphaeraceae	ADurb.Bin063-1	ASV_ 10115	0	0	0	0	0	0	0	0	0	0	0	0	0	0	0	0	0	0	0	0	0	0	0	0	0	0	0	0	0	0	0	0	0	0	0	0	0	0	0	0	0	0
	Bacteria	Proteobacteria	Gammaproteobacteria	Burkholderiales	Comamonadaceae	NA	ASV_ 10116	0	0	0	0	0	0	0	0	0	0	0	0	0	0	0	0	0	0	0	0	0	0	0	0	0	0	0	0	0	0	0	0	0	0	0	0	0	0	0	0	0	0
	Bacteria	Cyanobacteria	Cyanobacteria	Synechococcales	Cyanobiaceae	Cyanobium PCC-6307	ASV_ 10117	0	0	0	0	0	0	0	0	0	0	0	0	0	0	0	0	0	0	0	0	0	0	0	0	0	0	0	0	0	0	0	0	0	0	0	0	0	0	0	0	0	0
	Bacteria	Fibrobacterota	Fibrobacteria	Fibrobacterales	NA	NA	ASV_ 10118	0	0	0	0	0	0	0	0	0	0	0	0	0	0	0	0	0	0	0	0	0	0	0	0	0	0	0	0	0	0	0	0	0	0	0	0	0	0	0	0	0	0
	Bacteria	TA06	NA	NA	NA	NA	ASV_ 10119	0	0	0	0	0	0	0	0	0	0	0	0	0	0	0	0	0	0	0	0	0	0	0	0	0	0	0	0	0	0	0	0	0	0	0	0	0	0	0	0	0	0
	Bacteria	Proteobacteria	Alphaproteobacteria	Sphingomonadales	Sphingomonadaceae	NA	ASV_ 1012	0	0	0	0	213	155	0	0	0	0	0	0	0	0	0	0	0.000835566	0.000605398	0	0	0	0	0	0	0.00012008	0	0	0	0	1	1	0	0	0	0	0	0	0	0	0	0	0
	Bacteria	Nitrospirota	Thermodesulfovibrionia	NA	NA	NA	ASV_ 10120	0	0	0	0	0	0	0	0	0	0	0	0	0	0	0	0	0	0	0	0	0	0	0	0	0	0	0	0	0	0	0	0	0	0	0	0	0	0	0	0	0	0
	Bacteria	Myxococcota	Polyangia	Haliangiales	Haliangiaceae	Haliangium	ASV_ 10121	0	0	0	0	0	0	0	0	0	0	0	0	0	0	0	0	0	0	0	0	0	0	0	0	0	0	0	0	0	0	0	0	0	0	0	0	0	0	0	0	0	0
	Bacteria	Planctomycetota	Planctomycetes	Planctomycetales	Rubinisphaeraceae	NA	ASV_ 10122	0	0	0	0	0	0	0	0	0	0	0	0	0	0	0	0	0	0	0	0	0	0	0	0	0	0	0	0	0	0	0	0	0	0	0	0	0	0	0	0	0	0
	Archaea	NA	NA	NA	NA	NA	ASV_ 10123	0	0	0	0	0	0	0	0	0	0	0	0	0	0	0	0	0	0	0	0	0	0	0	0	0	0	0	0	0	0	0	0	0	0	0	0	0	0	0	0	0	0
	Archaea	Nanoarchaeota	Nanoarchaeia	Woesearchaeales	NA	NA	ASV_ 10124	0	0	0	0	0	0	0	0	0	0	0	0	0	0	0	0	0	0	0	0	0	0	0	0	0	0	0	0	0	0	0	0	0	0	0	0	0	0	0	0	0	0
	Bacteria	Proteobacteria	Alphaproteobacteria	Rhodobacterales	Rhodobacteraceae	Tabrizicola	ASV_ 10125	0	0	0	0	0	0	0	0	0	0	0	0	0	0	0	0	0	0	0	0	0	0	0	0	0	0	0	0	0	0	0	0	0	0	0	0	0	0	0	0	0	0
	Bacteria	NB1-j	NA	NA	NA	NA	ASV_ 10126	0	0	0	0	0	0	0	0	0	0	0	0	0	0	0	0	0	0	0	0	0	0	0	0	0	0	0	0	0	0	0	0	0	0	0	0	0	0	0	0	0	0
	Bacteria	Verrucomicrobiota	Chlamydiae	LD1-PA32	NA	NA	ASV_ 10127	0	0	0	0	0	0	0	0	0	0	0	0	0	0	0	0	0	0	0	0	0	0	0	0	0	0	0	0	0	0	0	0	0	0	0	0	0	0	0	0	0	0
	Bacteria	WS1	NA	NA	NA	NA	ASV_ 10128	0	0	0	0	0	0	0	0	0	0	0	0	0	0	0	0	0	0	0	0	0	0	0	0	0	0	0	0	0	0	0	0	0	0	0	0	0	0	0	0	0	0
	Bacteria	Bdellovibrionota	Oligoflexia	Silvanigrellales	Silvanigrellaceae	NA	ASV_ 10129	0	0	0	0	0	0	0	0	0	0	0	0	0	0	0	0	0	0	0	0	0	0	0	0	0	0	0	0	0	0	0	0	0	0	0	0	0	0	0	0	0	0
	Bacteria	Planctomycetota	Planctomycetes	Gemmatales	Gemmataceae	NA	ASV_ 1013	0	0	0	0	6	0	184	96	40	51	500	493	0	0	0	0	2.35371e-05	0	0.000591446	0.000262022	0.000127161	0.000170569	0.00135936	0.00132321	0.000321443	0	0	0	0	0	0	1	1	1	1	1	1	0	0	0	0	0
	Archaea	Nanoarchaeota	Nanoarchaeia	Woesearchaeales	NA	NA	ASV_ 10130	0	0	0	0	0	0	0	0	0	0	0	0	0	0	0	0	0	0	0	0	0	0	0	0	0	0	0	0	0	0	0	0	0	0	0	0	0	0	0	0	0	0
	Bacteria	NA	NA	NA	NA	NA	ASV_ 10131	0	0	0	0	0	0	0	0	0	0	0	0	0	0	0	0	0	0	0	0	0	0	0	0	0	0	0	0	0	0	0	0	0	0	0	0	0	0	0	0	0	0
	Bacteria	Actinobacteriota	Acidimicrobiia	IMCC26256	NA	NA	ASV_ 10132	0	0	0	0	0	0	0	0	0	0	0	0	0	0	0	0	0	0	0	0	0	0	0	0	0	0	0	0	0	0	0	0	0	0	0	0	0	0	0	0	0	0
	Bacteria	Proteobacteria	Alphaproteobacteria	Acetobacterales	Acetobacteraceae	Acetobacter	ASV_ 10133	0	0	0	0	0	0	0	0	0	0	0	0	0	0	0	0	0	0	0	0	0	0	0	0	0	0	0	0	0	0	0	0	0	0	0	0	0	0	0	0	0	0
	Bacteria	Spirochaetota	Spirochaetia	Spirochaetales	Spirochaetaceae	M2PT2-76 termite group	ASV_ 10134	0	0	0	0	0	0	0	0	0	0	0	0	0	0	0	0	0	0	0	0	0	0	0	0	0	0	0	0	0	0	0	0	0	0	0	0	0	0	0	0	0	0
	Bacteria	Planctomycetota	Planctomycetes	Pirellulales	Pirellulaceae	Pirellula	ASV_ 10135	0	0	0	0	0	0	0	0	0	0	0	0	0	0	0	0	0	0	0	0	0	0	0	0	0	0	0	0	0	0	0	0	0	0	0	0	0	0	0	0	0	0
	Bacteria	Bacteroidota	Bacteroidia	Cytophagales	Cyclobacteriaceae	NA	ASV_ 10136	0	0	0	0	0	0	0	0	0	0	0	0	0	0	0	0	0	0	0	0	0	0	0	0	0	0	0	0	0	0	0	0	0	0	0	0	0	0	0	0	0	0
	Bacteria	Actinobacteriota	Actinobacteria	PeM15	NA	NA	ASV_ 10137	0	0	0	0	0	0	0	0	0	0	0	0	0	0	0	0	0	0	0	0	0	0	0	0	0	0	0	0	0	0	0	0	0	0	0	0	0	0	0	0	0	0
	Bacteria	Planctomycetota	Pla4 lineage	NA	NA	NA	ASV_ 10138	0	0	0	0	0	0	0	0	0	0	0	0	0	0	0	0	0	0	0	0	0	0	0	0	0	0	0	0	0	0	0	0	0	0	0	0	0	0	0	0	0	0
	Archaea	Nanoarchaeota	Nanoarchaeia	Woesearchaeales	NA	NA	ASV_ 10139	0	0	0	0	0	0	0	0	0	0	0	0	0	0	0	0	0	0	0	0	0	0	0	0	0	0	0	0	0	0	0	0	0	0	0	0	0	0	0	0	0	0
	Bacteria	Verrucomicrobiota	Verrucomicrobiae	Chthoniobacterales	NA	NA	ASV_ 10140	0	0	0	0	0	0	0	0	0	0	0	0	0	0	0	0	0	0	0	0	0	0	0	0	0	0	0	0	0	0	0	0	0	0	0	0	0	0	0	0	0	0
	Bacteria	Verrucomicrobiota	Verrucomicrobiae	UA11	NA	NA	ASV_ 10141	0	0	0	0	0	0	0	0	0	0	0	0	0	0	0	0	0	0	0	0	0	0	0	0	0	0	0	0	0	0	0	0	0	0	0	0	0	0	0	0	0	0
	Bacteria	Sva0485	NA	NA	NA	NA	ASV_ 10142	0	0	0	0	0	0	0	0	0	0	0	0	0	0	0	0	0	0	0	0	0	0	0	0	0	0	0	0	0	0	0	0	0	0	0	0	0	0	0	0	0	0
	Bacteria	Bacteroidota	Bacteroidia	Flavobacteriales	Flavobacteriaceae	Flavobacterium	ASV_ 10143	0	0	0	0	0	0	0	0	0	0	0	0	0	0	0	0	0	0	0	0	0	0	0	0	0	0	0	0	0	0	0	0	0	0	0	0	0	0	0	0	0	0
	Bacteria	Chloroflexi	Anaerolineae	Anaerolineales	Anaerolineaceae	NA	ASV_ 10144	0	0	0	0	0	0	0	0	0	0	0	0	0	0	0	0	0	0	0	0	0	0	0	0	0	0	0	0	0	0	0	0	0	0	0	0	0	0	0	0	0	0
	Bacteria	Latescibacterota	Latescibacteria	Latescibacterales	Latescibacteraceae	NA	ASV_ 10145	0	0	0	0	0	0	0	0	0	0	0	0	0	0	0	0	0	0	0	0	0	0	0	0	0	0	0	0	0	0	0	0	0	0	0	0	0	0	0	0	0	0
	Bacteria	Sva0485	NA	NA	NA	NA	ASV_ 10146	0	0	0	0	0	0	0	0	0	0	0	0	0	0	0	0	0	0	0	0	0	0	0	0	0	0	0	0	0	0	0	0	0	0	0	0	0	0	0	0	0	0
	Bacteria	Firmicutes	Clostridia	Oscillospirales	Hungateiclostridiaceae	NA	ASV_ 10147	0	0	0	0	0	0	0	0	0	0	0	0	0	0	0	0	0	0	0	0	0	0	0	0	0	0	0	0	0	0	0	0	0	0	0	0	0	0	0	0	0	0
	Bacteria	Myxococcota	Polyangia	Polyangiales	Phaselicystidaceae	Phaselicystis	ASV_ 10148	0	0	0	0	0	0	0	0	0	0	0	0	0	0	0	0	0	0	0	0	0	0	0	0	0	0	0	0	0	0	0	0	0	0	0	0	0	0	0	0	0	0
	Bacteria	Proteobacteria	Alphaproteobacteria	Caulobacterales	Hyphomonadaceae	SWB02	ASV_ 10149	0	0	0	0	0	0	0	0	0	0	0	0	0	0	0	0	0	0	0	0	0	0	0	0	0	0	0	0	0	0	0	0	0	0	0	0	0	0	0	0	0	0
	Bacteria	NA	NA	NA	NA	NA	ASV_ 1015	0	0	0	0	0	0	0	0	0	0	10	0	0	0	0	0	0	0	0	0	0	0	2.71873e-05	0	2.26561e-06	0	0	0	0	0	0	0	0	0	0	0	0	0	0	0	0	0
	Bacteria	Proteobacteria	Gammaproteobacteria	CCD24	NA	NA	ASV_ 10150	0	0	0	0	0	0	0	0	0	0	0	0	0	0	0	0	0	0	0	0	0	0	0	0	0	0	0	0	0	0	0	0	0	0	0	0	0	0	0	0	0	0
	Bacteria	Proteobacteria	Gammaproteobacteria	Burkholderiales	Comamonadaceae	Aquabacterium	ASV_ 10151	0	0	0	0	0	0	0	0	0	0	0	0	0	0	0	0	0	0	0	0	0	0	0	0	0	0	0	0	0	0	0	0	0	0	0	0	0	0	0	0	0	0
	Archaea	Crenarchaeota	Nitrososphaeria	Nitrosocaldales	Nitrosocaldaceae	NA	ASV_ 10152	0	0	0	0	0	0	0	0	0	0	0	0	0	0	0	0	0	0	0	0	0	0	0	0	0	0	0	0	0	0	0	0	0	0	0	0	0	0	0	0	0	0
	Bacteria	Bacteroidota	Bacteroidia	Chitinophagales	Saprospiraceae	Lewinella	ASV_ 10153	0	0	0	0	0	0	0	0	0	0	0	0	0	0	0	0	0	0	0	0	0	0	0	0	0	0	0	0	0	0	0	0	0	0	0	0	0	0	0	0	0	0
	Bacteria	Myxococcota	Polyangia	mle1-27	NA	NA	ASV_ 10154	0	0	0	0	0	0	0	0	0	0	0	0	0	0	0	0	0	0	0	0	0	0	0	0	0	0	0	0	0	0	0	0	0	0	0	0	0	0	0	0	0	0
	Bacteria	Acidobacteriota	Vicinamibacteria	Vicinamibacterales	Vicinamibacteraceae	NA	ASV_ 10155	0	0	0	0	0	0	0	0	0	0	0	0	0	0	0	0	0	0	0	0	0	0	0	0	0	0	0	0	0	0	0	0	0	0	0	0	0	0	0	0	0	0
	Bacteria	Acidobacteriota	Thermoanaerobaculia	Thermoanaerobaculales	Thermoanaerobaculaceae	Subgroup 10	ASV_ 10156	0	0	0	0	0	0	0	0	0	0	0	0	0	0	0	0	0	0	0	0	0	0	0	0	0	0	0	0	0	0	0	0	0	0	0	0	0	0	0	0	0	0
	Bacteria	NA	NA	NA	NA	NA	ASV_ 10157	0	0	0	0	0	0	0	0	0	0	0	0	0	0	0	0	0	0	0	0	0	0	0	0	0	0	0	0	0	0	0	0	0	0	0	0	0	0	0	0	0	0
	Bacteria	Patescibacteria	Microgenomatia	NA	NA	NA	ASV_ 10158	0	0	0	0	0	0	0	0	11	0	0	0	0	0	0	0	0	0	0	0	3.49693e-05	0	0	0	2.9141e-06	0	0	0	0	0	0	0	0	0	0	0	0	0	0	0	0	0
	Bacteria	Firmicutes	Clostridia	Gracilibacteraceae	NA	NA	ASV_ 10159	0	0	0	0	0	0	0	0	0	0	0	0	0	0	0	0	0	0	0	0	0	0	0	0	0	0	0	0	0	0	0	0	0	0	0	0	0	0	0	0	0	0
	Bacteria	Chloroflexi	Anaerolineae	Thermoflexales	Thermoflexaceae	Thermoflexus	ASV_ 10160	0	0	0	0	0	0	0	0	0	0	0	0	0	0	0	0	0	0	0	0	0	0	0	0	0	0	0	0	0	0	0	0	0	0	0	0	0	0	0	0	0	0
	Bacteria	Verrucomicrobiota	Verrucomicrobiae	Pedosphaerales	Pedosphaeraceae	NA	ASV_ 10161	0	0	0	0	0	0	0	0	0	0	0	0	0	0	0	0	0	0	0	0	0	0	0	0	0	0	0	0	0	0	0	0	0	0	0	0	0	0	0	0	0	0
	Archaea	Crenarchaeota	Bathyarchaeia	NA	NA	NA	ASV_ 10162	0	7	0	0	0	8	0	0	0	0	0	0	0	4.00632e-05	0	0	0	3.12463e-05	0	0	0	0	0	0	5.94246e-06	0	0	0	0	0	0	0	0	0	0	0	0	0	0	0	0	0
	Archaea	Nanoarchaeota	Nanoarchaeia	Woesearchaeales	SCGC AAA011-D5	NA	ASV_ 10163	0	0	0	0	0	0	0	0	0	0	0	0	0	0	0	0	0	0	0	0	0	0	0	0	0	0	0	0	0	0	0	0	0	0	0	0	0	0	0	0	0	0
	Bacteria	WS1	NA	NA	NA	NA	ASV_ 10165	0	0	0	0	0	0	12	8	0	0	0	0	0	0	0	0	0	0	3.85726e-05	2.18352e-05	0	0	0	0	5.03398e-06	0	0	0	0	0	0	0	0	0	0	0	0	0	0	0	0	0
	Bacteria	Actinobacteriota	RBG-16-55-12	NA	NA	NA	ASV_ 10166	0	0	0	0	0	0	0	0	0	0	0	0	0	0	0	0	0	0	0	0	0	0	0	0	0	0	0	0	0	0	0	0	0	0	0	0	0	0	0	0	0	0
	Bacteria	Cyanobacteria	Cyanobacteria	Chloroplast	NA	NA	ASV_ 10167	0	0	0	0	0	0	0	0	0	0	0	0	0	0	0	0	0	0	0	0	0	0	0	0	0	0	0	0	0	0	0	0	0	0	0	0	0	0	0	0	0	0
	Bacteria	Bdellovibrionota	Bdellovibrionia	Bdellovibrionales	Bdellovibrionaceae	OM27 clade	ASV_ 10168	0	0	0	0	0	0	0	0	0	0	0	0	0	0	0	0	0	0	0	0	0	0	0	0	0	0	0	0	0	0	0	0	0	0	0	0	0	0	0	0	0	0
	Archaea	Crenarchaeota	Bathyarchaeia	NA	NA	NA	ASV_ 10169	0	0	0	0	0	0	0	0	0	0	0	0	0	0	0	0	0	0	0	0	0	0	0	0	0	0	0	0	0	0	0	0	0	0	0	0	0	0	0	0	0	0
	Bacteria	Verrucomicrobiota	Verrucomicrobiae	Opitutales	Puniceicoccaceae	Verruc-01	ASV_ 10170	0	0	0	0	0	0	0	0	0	0	0	0	0	0	0	0	0	0	0	0	0	0	0	0	0	0	0	0	0	0	0	0	0	0	0	0	0	0	0	0	0	0
	Bacteria	Proteobacteria	Alphaproteobacteria	Rickettsiales	Mitochondria	NA	ASV_ 10171	0	0	0	0	0	0	0	0	0	0	0	0	0	0	0	0	0	0	0	0	0	0	0	0	0	0	0	0	0	0	0	0	0	0	0	0	0	0	0	0	0	0
	Bacteria	Planctomycetota	OM190	NA	NA	NA	ASV_ 10172	0	0	0	0	0	0	0	0	0	0	0	0	0	0	0	0	0	0	0	0	0	0	0	0	0	0	0	0	0	0	0	0	0	0	0	0	0	0	0	0	0	0
	Archaea	NA	NA	NA	NA	NA	ASV_ 10173	0	0	0	0	0	0	0	0	0	0	0	0	0	0	0	0	0	0	0	0	0	0	0	0	0	0	0	0	0	0	0	0	0	0	0	0	0	0	0	0	0	0
	Archaea	Crenarchaeota	Bathyarchaeia	NA	NA	NA	ASV_ 10175	18	0	0	0	0	0	0	0	15	0	0	12	8.4338e-05	0	0	0	0	0	0	0	4.76854e-05	0	0	3.2208e-05	1.36859e-05	0	0	0	0	0	0	0	0	0	0	0	0	0	0	0	0	0
	Archaea	Crenarchaeota	Bathyarchaeia	NA	NA	NA	ASV_ 10176	13	4	0	0	0	0	0	0	0	3	0	25	6.09108e-05	2.28932e-05	0	0	0	0	0	0	0	1.00334e-05	0	6.71e-05	1.34115e-05	0	0	0	0	0	0	0	0	0	0	0	0	0	0	0	0	0
	Bacteria	Sva0485	NA	NA	NA	NA	ASV_ 10177	9	0	0	0	4	0	8	8	1	0	15	0	4.2169e-05	0	0	0	1.56914e-05	0	2.5715e-05	2.18352e-05	3.17902e-06	0	4.07809e-05	0	1.24475e-05	0	0	0	0	0	0	0	0	0	0	0	0	0	0	0	0	0
	Bacteria	Cyanobacteria	Vampirivibrionia	Obscuribacterales	Obscuribacteraceae	NA	ASV_ 10178	7	12	0	0	0	0	0	0	0	0	0	0	3.27981e-05	6.86797e-05	0	0	0	0	0	0	0	0	0	0	8.45649e-06	0	0	0	0	0	0	0	0	0	0	0	0	0	0	0	0	0
	Bacteria	NA	NA	NA	NA	NA	ASV_ 10180	0	12	14	11	0	8	0	0	0	0	0	0	0	6.86797e-05	4.47043e-05	4.27314e-05	0	3.12463e-05	0	0	0	0	0	0	1.56135e-05	0	0	0	0	0	0	0	0	0	0	0	0	0	0	0	0	0
	Archaea	Crenarchaeota	Bathyarchaeia	NA	NA	NA	ASV_ 10181	0	0	20	25	0	0	0	0	0	0	0	0	0	0	6.38633e-05	9.71168e-05	0	0	0	0	0	0	0	0	1.3415e-05	0	0	0	0	0	0	0	0	0	0	0	0	0	0	0	0	0
	Bacteria	Myxococcota	bacteriap25	NA	NA	NA	ASV_ 10182	0	0	0	0	0	0	16	0	0	0	9	20	0	0	0	0	0	0	5.14301e-05	0	0	0	2.44686e-05	5.368e-05	1.07982e-05	0	0	0	0	0	0	0	0	0	0	0	0	0	0	0	0	0
	Bacteria	Chloroflexi	Anaerolineae	Anaerolineales	Anaerolineaceae	NA	ASV_ 10183	0	0	0	0	0	0	10	0	0	0	0	0	0	0	0	0	0	0	3.21438e-05	0	0	0	0	0	2.67865e-06	0	0	0	0	0	0	0	0	0	0	0	0	0	0	0	0	0
	Archaea	Halobacterota	Methanosarcinia	Methanosarciniales	Methanosarcinaceae	Methanosarcina	ASV_ 10184	0	0	0	0	0	0	9	0	0	0	0	0	0	0	0	0	0	0	2.89294e-05	0	0	0	0	0	2.41078e-06	0	0	0	0	0	0	0	0	0	0	0	0	0	0	0	0	0
	Bacteria	RCP2-54	NA	NA	NA	NA	ASV_ 10185	0	0	0	0	0	0	0	45	0	0	0	0	0	0	0	0	0	0	0	0.000122823	0	0	0	0	1.02352e-05	0	0	0	0	0	0	0	1	0	0	0	0	0	0	0	0	0
	Bacteria	Myxococcota	Polyangia	Haliangiales	Haliangiaceae	Haliangium	ASV_ 10186	0	0	0	0	0	0	0	0	0	0	25	20	0	0	0	0	0	0	0	0	0	0	6.79682e-05	5.368e-05	1.01374e-05	0	0	0	0	0	0	0	0	0	0	0	0	0	0	0	0	0
	Bacteria	Proteobacteria	Alphaproteobacteria	Zavarziniales	NA	NA	ASV_ 10187	0	0	0	0	0	0	0	0	0	0	24	18	0	0	0	0	0	0	0	0	0	0	6.52495e-05	4.8312e-05	9.46346e-06	0	0	0	0	0	0	0	0	0	0	0	0	0	0	0	0	0
	Bacteria	Planctomycetota	Phycisphaerae	Pla1 lineage	NA	NA	ASV_ 10188	0	0	0	0	0	0	0	0	0	0	10	0	0	0	0	0	0	0	0	0	0	0	2.71873e-05	0	2.26561e-06	0	0	0	0	0	0	0	0	0	0	0	0	0	0	0	0	0
	Bacteria	Bacteroidota	Bacteroidia	Sphingobacteriales	NA	NA	ASV_ 10189	0	0	0	0	0	0	0	0	0	0	0	5	0	0	0	0	0	0	0	0	0	0	0	1.342e-05	1.11833e-06	0	0	0	0	0	0	0	0	0	0	0	0	0	0	0	0	0
	Bacteria	Acidobacteriota	Subgroup 18	NA	NA	NA	ASV_ 1019	0	0	0	0	0	0	0	0	0	0	0	0	0	0	0	0	0	0	0	0	0	0	0	0	0	0	0	0	0	0	0	0	0	0	0	0	0	0	0	0	0	0
	Bacteria	Chloroflexi	Anaerolineae	Anaerolineales	Anaerolineaceae	NA	ASV_ 10190	0	0	0	0	0	0	0	0	0	0	0	0	0	0	0	0	0	0	0	0	0	0	0	0	0	0	0	0	0	0	0	0	0	0	0	0	0	0	0	0	0	0
	Bacteria	Spirochaetota	Spirochaetia	Spirochaetales	Spirochaetaceae	Spirochaeta	ASV_ 10191	0	0	0	0	0	0	0	0	0	0	0	0	0	0	0	0	0	0	0	0	0	0	0	0	0	0	0	0	0	0	0	0	0	0	0	0	0	0	0	0	0	0
	Bacteria	Planctomycetota	Phycisphaerae	MSBL9	SG8-4	NA	ASV_ 10192	0	0	0	0	0	0	0	0	0	0	0	0	0	0	0	0	0	0	0	0	0	0	0	0	0	0	0	0	0	0	0	0	0	0	0	0	0	0	0	0	0	0
	Bacteria	Patescibacteria	Parcubacteria	NA	NA	NA	ASV_ 10193	0	0	0	0	0	0	0	0	0	0	0	0	0	0	0	0	0	0	0	0	0	0	0	0	0	0	0	0	0	0	0	0	0	0	0	0	0	0	0	0	0	0
	Archaea	Crenarchaeota	Bathyarchaeia	NA	NA	NA	ASV_ 10194	0	0	0	0	0	0	0	0	0	0	0	0	0	0	0	0	0	0	0	0	0	0	0	0	0	0	0	0	0	0	0	0	0	0	0	0	0	0	0	0	0	0
	Bacteria	Desulfobacterota	Syntrophobacteria	Syntrophobacterales	Syntrophobacteraceae	NA	ASV_ 10195	0	0	0	0	0	0	0	0	0	0	0	0	0	0	0	0	0	0	0	0	0	0	0	0	0	0	0	0	0	0	0	0	0	0	0	0	0	0	0	0	0	0
	Bacteria	Planctomycetota	Phycisphaerae	Phycisphaerales	AKAU3564 sediment group	NA	ASV_ 10196	0	0	0	0	0	0	0	0	0	0	0	0	0	0	0	0	0	0	0	0	0	0	0	0	0	0	0	0	0	0	0	0	0	0	0	0	0	0	0	0	0	0
	Bacteria	Modulibacteria	Moduliflexia	Moduliflexales	Moduliflexaceae	NA	ASV_ 10197	0	0	0	0	0	0	0	0	0	0	0	0	0	0	0	0	0	0	0	0	0	0	0	0	0	0	0	0	0	0	0	0	0	0	0	0	0	0	0	0	0	0
	Bacteria	Verrucomicrobiota	Kiritimatiellae	WCHB1-41	NA	NA	ASV_ 10198	0	0	0	0	0	0	0	0	0	0	0	0	0	0	0	0	0	0	0	0	0	0	0	0	0	0	0	0	0	0	0	0	0	0	0	0	0	0	0	0	0	0
	Archaea	Thermoplasmatota	Thermoplasmata	NA	NA	NA	ASV_ 10199	0	0	0	0	0	0	0	0	0	0	0	0	0	0	0	0	0	0	0	0	0	0	0	0	0	0	0	0	0	0	0	0	0	0	0	0	0	0	0	0	0	0
	Bacteria	Acidobacteriota	Vicinamibacteria	Subgroup 17	NA	NA	ASV_ 1020	0	0	0	0	0	0	0	0	0	0	0	0	0	0	0	0	0	0	0	0	0	0	0	0	0	0	0	0	0	0	0	0	0	0	0	0	0	0	0	0	0	0
	Bacteria	Chloroflexi	Anaerolineae	Caldilineales	Caldilineaceae	NA	ASV_ 10200	0	0	0	0	0	0	0	0	0	0	0	0	0	0	0	0	0	0	0	0	0	0	0	0	0	0	0	0	0	0	0	0	0	0	0	0	0	0	0	0	0	0
	Bacteria	Chloroflexi	Anaerolineae	NA	NA	NA	ASV_ 10201	0	0	0	0	0	0	0	0	0	0	0	0	0	0	0	0	0	0	0	0	0	0	0	0	0	0	0	0	0	0	0	0	0	0	0	0	0	0	0	0	0	0
	Bacteria	Firmicutes	NA	NA	NA	NA	ASV_ 10202	0	0	0	0	0	0	0	0	0	0	0	0	0	0	0	0	0	0	0	0	0	0	0	0	0	0	0	0	0	0	0	0	0	0	0	0	0	0	0	0	0	0
	Bacteria	Sumerlaeota	Sumerlaeia	Sumerlaeales	Sumerlaeaceae	Sumerlaea	ASV_ 10203	0	0	0	0	0	0	0	0	0	0	0	0	0	0	0	0	0	0	0	0	0	0	0	0	0	0	0	0	0	0	0	0	0	0	0	0	0	0	0	0	0	0
	Bacteria	Planctomycetota	Phycisphaerae	Phycisphaerales	Phycisphaeraceae	CL500-3	ASV_ 10204	0	0	0	0	0	0	0	0	0	0	0	0	0	0	0	0	0	0	0	0	0	0	0	0	0	0	0	0	0	0	0	0	0	0	0	0	0	0	0	0	0	0
	Bacteria	Planctomycetota	vadinHA49	NA	NA	NA	ASV_ 10205	0	0	0	0	0	0	0	0	0	0	0	0	0	0	0	0	0	0	0	0	0	0	0	0	0	0	0	0	0	0	0	0	0	0	0	0	0	0	0	0	0	0
	Bacteria	Cyanobacteria	Cyanobacteria	Cyanobacteriales	Gloeocapsaceae	Gloeocapsa	ASV_ 10206	0	0	0	0	0	0	0	0	0	0	0	0	0	0	0	0	0	0	0	0	0	0	0	0	0	0	0	0	0	0	0	0	0	0	0	0	0	0	0	0	0	0
	Bacteria	Desulfobacterota	Desulfobacteria	Desulfatiglandales	Desulfatiglandaceae	Desulfatiglans	ASV_ 10207	0	0	0	0	0	0	0	0	0	0	0	0	0	0	0	0	0	0	0	0	0	0	0	0	0	0	0	0	0	0	0	0	0	0	0	0	0	0	0	0	0	0
	Bacteria	Actinobacteriota	Thermoleophilia	Gaiellales	NA	NA	ASV_ 10208	0	0	0	0	0	0	0	0	0	0	0	0	0	0	0	0	0	0	0	0	0	0	0	0	0	0	0	0	0	0	0	0	0	0	0	0	0	0	0	0	0	0
	Bacteria	Patescibacteria	Parcubacteria	NA	NA	NA	ASV_ 10209	0	0	0	0	0	0	0	0	0	0	0	0	0	0	0	0	0	0	0	0	0	0	0	0	0	0	0	0	0	0	0	0	0	0	0	0	0	0	0	0	0	0
	Bacteria	Latescibacterota	NA	NA	NA	NA	ASV_ 10210	0	0	0	0	0	0	0	0	0	0	0	0	0	0	0	0	0	0	0	0	0	0	0	0	0	0	0	0	0	0	0	0	0	0	0	0	0	0	0	0	0	0
	Bacteria	Sumerlaeota	Sumerlaeia	NA	NA	NA	ASV_ 10211	0	0	0	0	0	0	0	0	0	0	0	0	0	0	0	0	0	0	0	0	0	0	0	0	0	0	0	0	0	0	0	0	0	0	0	0	0	0	0	0	0	0
	Archaea	Thermoplasmatota	Thermoplasmata	Marine Benthic Group D and DHVEG-1	NA	NA	ASV_ 10212	0	0	0	0	0	0	0	0	0	0	0	0	0	0	0	0	0	0	0	0	0	0	0	0	0	0	0	0	0	0	0	0	0	0	0	0	0	0	0	0	0	0
	Bacteria	Desulfobacterota	NA	NA	NA	NA	ASV_ 10213	0	0	0	0	0	0	0	0	0	0	0	0	0	0	0	0	0	0	0	0	0	0	0	0	0	0	0	0	0	0	0	0	0	0	0	0	0	0	0	0	0	0
	Bacteria	LCP-89	NA	NA	NA	NA	ASV_ 10214	0	0	0	0	0	0	0	0	0	0	0	0	0	0	0	0	0	0	0	0	0	0	0	0	0	0	0	0	0	0	0	0	0	0	0	0	0	0	0	0	0	0
	Bacteria	Modulibacteria	Moduliflexia	Moduliflexales	Moduliflexaceae	NA	ASV_ 10215	0	0	0	0	0	0	0	0	0	0	0	0	0	0	0	0	0	0	0	0	0	0	0	0	0	0	0	0	0	0	0	0	0	0	0	0	0	0	0	0	0	0
	Bacteria	Bacteroidota	Bacteroidia	Bacteroidales	Bacteroidetes BD2-2	NA	ASV_ 10216	0	0	0	0	0	0	0	0	0	0	0	0	0	0	0	0	0	0	0	0	0	0	0	0	0	0	0	0	0	0	0	0	0	0	0	0	0	0	0	0	0	0
	Archaea	Euryarchaeota	Methanobacteria	Methanobacteriales	Methanobacteriaceae	Methanobacterium	ASV_ 10217	0	0	0	0	0	0	0	0	0	0	0	0	0	0	0	0	0	0	0	0	0	0	0	0	0	0	0	0	0	0	0	0	0	0	0	0	0	0	0	0	0	0
	Bacteria	Dependentiae	Babeliae	Babeliales	UBA12411	NA	ASV_ 10218	0	0	0	0	0	0	0	0	0	0	0	0	0	0	0	0	0	0	0	0	0	0	0	0	0	0	0	0	0	0	0	0	0	0	0	0	0	0	0	0	0	0
	Bacteria	Chloroflexi	Anaerolineae	MSB-5B2	NA	NA	ASV_ 10219	0	0	0	0	0	0	0	0	0	0	0	0	0	0	0	0	0	0	0	0	0	0	0	0	0	0	0	0	0	0	0	0	0	0	0	0	0	0	0	0	0	0
	Bacteria	Chloroflexi	Dehalococcoidia	GIF3	NA	NA	ASV_ 10220	0	0	0	0	0	0	0	0	0	0	0	0	0	0	0	0	0	0	0	0	0	0	0	0	0	0	0	0	0	0	0	0	0	0	0	0	0	0	0	0	0	0
	Bacteria	Chloroflexi	Dehalococcoidia	GIF3	NA	NA	ASV_ 10221	0	0	0	0	0	0	0	0	0	0	0	0	0	0	0	0	0	0	0	0	0	0	0	0	0	0	0	0	0	0	0	0	0	0	0	0	0	0	0	0	0	0
	Bacteria	Cloacimonadota	Cloacimonadia	Cloacimonadales	NA	NA	ASV_ 10222	0	0	0	0	0	0	0	0	0	0	0	0	0	0	0	0	0	0	0	0	0	0	0	0	0	0	0	0	0	0	0	0	0	0	0	0	0	0	0	0	0	0
	Bacteria	Chloroflexi	Dehalococcoidia	NA	NA	NA	ASV_ 10223	0	0	0	0	0	0	0	0	0	0	0	0	0	0	0	0	0	0	0	0	0	0	0	0	0	0	0	0	0	0	0	0	0	0	0	0	0	0	0	0	0	0
	Bacteria	Dependentiae	Babeliae	Babeliales	NA	NA	ASV_ 10224	0	0	0	0	0	0	0	0	0	0	0	0	0	0	0	0	0	0	0	0	0	0	0	0	0	0	0	0	0	0	0	0	0	0	0	0	0	0	0	0	0	0
	Archaea	Thermoplasmatota	Thermoplasmata	NA	NA	NA	ASV_ 10225	0	0	0	0	0	0	0	0	0	0	0	0	0	0	0	0	0	0	0	0	0	0	0	0	0	0	0	0	0	0	0	0	0	0	0	0	0	0	0	0	0	0
	Bacteria	Chloroflexi	Anaerolineae	Anaerolineales	Anaerolineaceae	NA	ASV_ 10226	0	0	0	0	0	0	0	0	0	0	0	0	0	0	0	0	0	0	0	0	0	0	0	0	0	0	0	0	0	0	0	0	0	0	0	0	0	0	0	0	0	0
	Bacteria	Firmicutes	Clostridia	Oscillospirales	Hungateiclostridiaceae	NA	ASV_ 10227	0	0	0	0	0	0	0	0	0	0	0	0	0	0	0	0	0	0	0	0	0	0	0	0	0	0	0	0	0	0	0	0	0	0	0	0	0	0	0	0	0	0
	Bacteria	Chloroflexi	Anaerolineae	RBG-13-54-9	NA	NA	ASV_ 10228	0	0	0	0	0	0	0	0	0	0	0	0	0	0	0	0	0	0	0	0	0	0	0	0	0	0	0	0	0	0	0	0	0	0	0	0	0	0	0	0	0	0
	Bacteria	Chloroflexi	Anaerolineae	Anaerolineales	Anaerolineaceae	NA	ASV_ 10229	0	0	0	0	0	0	0	0	0	0	0	0	0	0	0	0	0	0	0	0	0	0	0	0	0	0	0	0	0	0	0	0	0	0	0	0	0	0	0	0	0	0
	Bacteria	Proteobacteria	Gammaproteobacteria	Burkholderiales	Hydrogenophilaceae	Thiobacillus	ASV_ 1023	0	0	0	0	0	0	0	0	0	0	0	0	0	0	0	0	0	0	0	0	0	0	0	0	0	0	0	0	0	0	0	0	0	0	0	0	0	0	0	0	0	0
	Bacteria	Bacteroidota	Ignavibacteria	SJA-28	NA	NA	ASV_ 10230	0	0	0	0	0	0	0	0	0	0	0	0	0	0	0	0	0	0	0	0	0	0	0	0	0	0	0	0	0	0	0	0	0	0	0	0	0	0	0	0	0	0
	Bacteria	Proteobacteria	Gammaproteobacteria	NA	NA	NA	ASV_ 10231	0	0	0	0	0	0	0	0	0	0	0	0	0	0	0	0	0	0	0	0	0	0	0	0	0	0	0	0	0	0	0	0	0	0	0	0	0	0	0	0	0	0
	Bacteria	Verrucomicrobiota	Kiritimatiellae	WCHB1-41	NA	NA	ASV_ 10232	0	0	0	0	0	0	0	0	0	0	0	0	0	0	0	0	0	0	0	0	0	0	0	0	0	0	0	0	0	0	0	0	0	0	0	0	0	0	0	0	0	0
	Bacteria	Verrucomicrobiota	Verrucomicrobiae	Pedosphaerales	Pedosphaeraceae	ADurb.Bin063-1	ASV_ 10233	0	0	0	0	0	0	0	0	0	0	0	0	0	0	0	0	0	0	0	0	0	0	0	0	0	0	0	0	0	0	0	0	0	0	0	0	0	0	0	0	0	0
	Bacteria	Proteobacteria	Gammaproteobacteria	Burkholderiales	Comamonadaceae	Methylibium	ASV_ 10234	0	0	0	0	0	0	0	0	0	0	0	0	0	0	0	0	0	0	0	0	0	0	0	0	0	0	0	0	0	0	0	0	0	0	0	0	0	0	0	0	0	0
	Archaea	Nanoarchaeota	Nanoarchaeia	Woesearchaeales	NA	NA	ASV_ 10235	0	0	0	0	0	0	0	0	0	0	0	0	0	0	0	0	0	0	0	0	0	0	0	0	0	0	0	0	0	0	0	0	0	0	0	0	0	0	0	0	0	0
	Bacteria	Chloroflexi	Anaerolineae	Anaerolineales	Anaerolineaceae	NA	ASV_ 10236	0	0	0	0	0	0	0	0	0	0	0	0	0	0	0	0	0	0	0	0	0	0	0	0	0	0	0	0	0	0	0	0	0	0	0	0	0	0	0	0	0	0
	Bacteria	Bacteroidota	Kryptonia	Kryptoniales	BSV26	NA	ASV_ 10237	0	0	0	0	0	0	0	0	0	0	0	0	0	0	0	0	0	0	0	0	0	0	0	0	0	0	0	0	0	0	0	0	0	0	0	0	0	0	0	0	0	0
	Bacteria	NA	NA	NA	NA	NA	ASV_ 10238	0	0	0	0	0	0	0	0	0	0	0	0	0	0	0	0	0	0	0	0	0	0	0	0	0	0	0	0	0	0	0	0	0	0	0	0	0	0	0	0	0	0
	Bacteria	Chloroflexi	Anaerolineae	Anaerolineales	Anaerolineaceae	GWD2-49-16	ASV_ 10239	0	0	0	0	0	0	0	0	0	0	0	0	0	0	0	0	0	0	0	0	0	0	0	0	0	0	0	0	0	0	0	0	0	0	0	0	0	0	0	0	0	0
	Bacteria	Desulfobacterota	Desulfuromonadia	Desulfuromonadales	Geothermobacteraceae	Geothermobacter	ASV_ 1024	0	0	0	0	0	0	0	0	0	0	21	23	0	0	0	0	0	0	0	0	0	0	5.70933e-05	6.1732e-05	9.90211e-06	0	0	0	0	0	0	0	0	0	0	0	0	0	0	0	0	0
	Bacteria	Patescibacteria	ABY1	Candidatus Komeilibacteria	NA	NA	ASV_ 10240	0	0	0	0	0	0	0	0	0	0	0	0	0	0	0	0	0	0	0	0	0	0	0	0	0	0	0	0	0	0	0	0	0	0	0	0	0	0	0	0	0	0
	Bacteria	Patescibacteria	ABY1	NA	NA	NA	ASV_ 10241	0	0	0	0	0	0	0	0	0	0	0	0	0	0	0	0	0	0	0	0	0	0	0	0	0	0	0	0	0	0	0	0	0	0	0	0	0	0	0	0	0	0
	Archaea	Crenarchaeota	Bathyarchaeia	NA	NA	NA	ASV_ 10242	0	0	0	0	0	0	0	0	0	0	0	0	0	0	0	0	0	0	0	0	0	0	0	0	0	0	0	0	0	0	0	0	0	0	0	0	0	0	0	0	0	0
	Bacteria	Spirochaetota	Brevinematia	Brevinematales	Brevinemataceae	Brevinema	ASV_ 10243	0	0	0	0	0	0	0	0	0	0	0	0	0	0	0	0	0	0	0	0	0	0	0	0	0	0	0	0	0	0	0	0	0	0	0	0	0	0	0	0	0	0
	Bacteria	Bdellovibrionota	Bdellovibrionia	Bdellovibrionales	Bdellovibrionaceae	OM27 clade	ASV_ 10244	0	0	0	0	0	0	0	0	0	0	0	0	0	0	0	0	0	0	0	0	0	0	0	0	0	0	0	0	0	0	0	0	0	0	0	0	0	0	0	0	0	0
	Bacteria	Proteobacteria	Alphaproteobacteria	Rhizobiales	Beijerinckiaceae	NA	ASV_ 10245	0	0	0	0	0	0	0	0	0	0	0	0	0	0	0	0	0	0	0	0	0	0	0	0	0	0	0	0	0	0	0	0	0	0	0	0	0	0	0	0	0	0
	Archaea	Aenigmarchaeota	Aenigmarchaeia	Aenigmarchaeales	NA	NA	ASV_ 10246	0	0	0	0	0	0	0	0	0	0	0	0	0	0	0	0	0	0	0	0	0	0	0	0	0	0	0	0	0	0	0	0	0	0	0	0	0	0	0	0	0	0
	Bacteria	NA	NA	NA	NA	NA	ASV_ 10247	0	0	0	0	0	0	0	0	0	0	0	0	0	0	0	0	0	0	0	0	0	0	0	0	0	0	0	0	0	0	0	0	0	0	0	0	0	0	0	0	0	0
	Bacteria	Proteobacteria	Alphaproteobacteria	Tistrellales	Geminicoccaceae	NA	ASV_ 10248	0	0	0	0	0	0	0	0	0	0	0	0	0	0	0	0	0	0	0	0	0	0	0	0	0	0	0	0	0	0	0	0	0	0	0	0	0	0	0	0	0	0
	Bacteria	Bacteroidota	Bacteroidia	Flavobacteriales	NS9 marine group	NA	ASV_ 10249	0	0	0	0	0	0	0	0	0	0	0	0	0	0	0	0	0	0	0	0	0	0	0	0	0	0	0	0	0	0	0	0	0	0	0	0	0	0	0	0	0	0
	Bacteria	Chloroflexi	Dehalococcoidia	Napoli-4B-65	NA	NA	ASV_ 10250	0	0	0	0	0	0	0	0	0	0	0	0	0	0	0	0	0	0	0	0	0	0	0	0	0	0	0	0	0	0	0	0	0	0	0	0	0	0	0	0	0	0
	Bacteria	Nitrospirota	Thermodesulfovibrionia	NA	NA	NA	ASV_ 10251	0	0	0	0	0	0	0	0	0	0	0	0	0	0	0	0	0	0	0	0	0	0	0	0	0	0	0	0	0	0	0	0	0	0	0	0	0	0	0	0	0	0
	Bacteria	Sva0485	NA	NA	NA	NA	ASV_ 10252	0	0	0	0	0	0	0	0	0	0	0	0	0	0	0	0	0	0	0	0	0	0	0	0	0	0	0	0	0	0	0	0	0	0	0	0	0	0	0	0	0	0
	Bacteria	Chloroflexi	Dehalococcoidia	ER-E4-17	NA	NA	ASV_ 10253	0	0	0	0	0	0	0	0	0	0	0	0	0	0	0	0	0	0	0	0	0	0	0	0	0	0	0	0	0	0	0	0	0	0	0	0	0	0	0	0	0	0
	Bacteria	Patescibacteria	ABY1	Candidatus Kerfeldbacteria	NA	NA	ASV_ 10254	0	0	0	0	0	0	0	0	0	0	0	0	0	0	0	0	0	0	0	0	0	0	0	0	0	0	0	0	0	0	0	0	0	0	0	0	0	0	0	0	0	0
	Bacteria	NA	NA	NA	NA	NA	ASV_ 10255	0	0	0	0	0	0	0	0	0	0	0	0	0	0	0	0	0	0	0	0	0	0	0	0	0	0	0	0	0	0	0	0	0	0	0	0	0	0	0	0	0	0
	Bacteria	Verrucomicrobiota	Verrucomicrobiae	Verrucomicrobiales	Rubritaleaceae	Luteolibacter	ASV_ 10256	0	0	0	0	0	0	0	0	0	0	0	0	0	0	0	0	0	0	0	0	0	0	0	0	0	0	0	0	0	0	0	0	0	0	0	0	0	0	0	0	0	0
	Bacteria	Desulfobacterota	Desulfobacteria	Desulfobacterales	Desulfosarcinaceae	SEEP-SRB1	ASV_ 10257	0	0	0	0	0	0	0	0	0	0	0	0	0	0	0	0	0	0	0	0	0	0	0	0	0	0	0	0	0	0	0	0	0	0	0	0	0	0	0	0	0	0
	Archaea	Crenarchaeota	Bathyarchaeia	NA	NA	NA	ASV_ 10258	0	0	0	0	0	0	0	0	0	0	0	0	0	0	0	0	0	0	0	0	0	0	0	0	0	0	0	0	0	0	0	0	0	0	0	0	0	0	0	0	0	0
	Bacteria	Methylomirabilota	Methylomirabilia	Methylomirabilales	Methylomirabilaceae	Sh765B-TzT-35	ASV_ 10259	0	0	0	0	0	0	0	0	0	0	0	0	0	0	0	0	0	0	0	0	0	0	0	0	0	0	0	0	0	0	0	0	0	0	0	0	0	0	0	0	0	0
	Bacteria	Chloroflexi	Anaerolineae	SBR1031	NA	NA	ASV_ 1026	16	0	0	0	0	0	0	0	0	0	75	105	7.49671e-05	0	0	0	0	0	0	0	0	0	0.000203905	0.00028182	4.67243e-05	0	0	0	0	0	0	0	0	0	0	1	1	0	0	0	0	0
	Bacteria	Armatimonadota	NA	NA	NA	NA	ASV_ 10260	0	0	0	0	0	0	0	0	0	0	0	0	0	0	0	0	0	0	0	0	0	0	0	0	0	0	0	0	0	0	0	0	0	0	0	0	0	0	0	0	0	0
	Bacteria	Bacteroidota	Bacteroidia	Cytophagales	Hymenobacteraceae	Hymenobacter	ASV_ 10261	0	0	0	0	0	0	0	0	0	0	0	0	0	0	0	0	0	0	0	0	0	0	0	0	0	0	0	0	0	0	0	0	0	0	0	0	0	0	0	0	0	0
	Bacteria	Acidobacteriota	Blastocatellia	2024-11-01	NA	NA	ASV_ 10262	0	0	0	0	0	0	0	0	0	0	0	0	0	0	0	0	0	0	0	0	0	0	0	0	0	0	0	0	0	0	0	0	0	0	0	0	0	0	0	0	0	0
	Bacteria	Proteobacteria	Alphaproteobacteria	Caulobacterales	Parvularculaceae	Amphiplicatus	ASV_ 10263	0	0	0	0	0	0	0	0	0	0	0	0	0	0	0	0	0	0	0	0	0	0	0	0	0	0	0	0	0	0	0	0	0	0	0	0	0	0	0	0	0	0
	Bacteria	Planctomycetota	Planctomycetes	NA	NA	NA	ASV_ 10264	0	0	0	0	0	0	0	0	0	0	0	0	0	0	0	0	0	0	0	0	0	0	0	0	0	0	0	0	0	0	0	0	0	0	0	0	0	0	0	0	0	0
	Bacteria	Verrucomicrobiota	Verrucomicrobiae	Verrucomicrobiales	Verrucomicrobiaceae	Brevifollis	ASV_ 10265	0	0	0	0	0	0	0	0	0	0	0	0	0	0	0	0	0	0	0	0	0	0	0	0	0	0	0	0	0	0	0	0	0	0	0	0	0	0	0	0	0	0
	Bacteria	Acidobacteriota	Acidobacteriae	AKIW659	NA	NA	ASV_ 10266	0	0	0	0	0	0	0	0	0	0	0	0	0	0	0	0	0	0	0	0	0	0	0	0	0	0	0	0	0	0	0	0	0	0	0	0	0	0	0	0	0	0
	Bacteria	Myxococcota	Polyangia	Polyangiales	Polyangiaceae	NA	ASV_ 10267	0	0	0	0	0	0	0	0	0	0	0	0	0	0	0	0	0	0	0	0	0	0	0	0	0	0	0	0	0	0	0	0	0	0	0	0	0	0	0	0	0	0
	Bacteria	Acidobacteriota	Vicinamibacteria	Vicinamibacterales	NA	NA	ASV_ 10268	0	0	0	0	0	0	0	0	0	0	0	0	0	0	0	0	0	0	0	0	0	0	0	0	0	0	0	0	0	0	0	0	0	0	0	0	0	0	0	0	0	0
	Bacteria	Firmicutes	Desulfotomaculia	Ammonifexales	Ammonificaceae	Thermodesulfitimonas	ASV_ 10269	0	0	0	0	0	0	0	0	0	0	0	0	0	0	0	0	0	0	0	0	0	0	0	0	0	0	0	0	0	0	0	0	0	0	0	0	0	0	0	0	0	0
	Bacteria	Bacteroidota	Bacteroidia	Chitinophagales	Saprospiraceae	NA	ASV_ 1027	0	0	0	0	0	0	0	0	0	0	0	0	0	0	0	0	0	0	0	0	0	0	0	0	0	0	0	0	0	0	0	0	0	0	0	0	0	0	0	0	0	0
	Bacteria	Myxococcota	Polyangia	Polyangiales	Phaselicystidaceae	Phaselicystis	ASV_ 10270	0	0	0	0	0	0	0	0	0	0	0	0	0	0	0	0	0	0	0	0	0	0	0	0	0	0	0	0	0	0	0	0	0	0	0	0	0	0	0	0	0	0
	Bacteria	Actinobacteriota	Acidimicrobiia	Actinomarinales	NA	NA	ASV_ 10272	0	0	0	0	0	0	0	0	0	0	0	0	0	0	0	0	0	0	0	0	0	0	0	0	0	0	0	0	0	0	0	0	0	0	0	0	0	0	0	0	0	0
	Bacteria	Hydrogenedentes	Hydrogenedentia	Hydrogenedentiales	Hydrogenedensaceae	NA	ASV_ 10273	0	0	0	0	0	0	0	0	0	0	0	0	0	0	0	0	0	0	0	0	0	0	0	0	0	0	0	0	0	0	0	0	0	0	0	0	0	0	0	0	0	0
	Bacteria	Planctomycetota	Phycisphaerae	MSBL9	KCLunmb-38-53	NA	ASV_ 10274	0	0	22	17	0	0	0	0	0	0	0	0	0	0	7.02496e-05	6.60394e-05	0	0	0	0	0	0	0	0	1.13574e-05	0	0	0	0	0	0	0	0	0	0	0	0	0	0	0	0	0
	Bacteria	Fibrobacterota	Fibrobacteria	Fibrobacterales	BBMC-4	NA	ASV_ 10278	0	0	0	0	4	0	0	0	0	0	31	9	0	0	0	0	1.56914e-05	0	0	0	0	0	8.42806e-05	2.4156e-05	1.0344e-05	0	0	0	0	0	0	0	0	0	0	0	0	0	0	0	0	0
	Bacteria	Patescibacteria	Parcubacteria	Candidatus Wolfebacteria	NA	NA	ASV_ 10279	0	0	0	0	0	12	0	0	15	17	0	0	0	0	0	0	0	4.68695e-05	0	0	4.76854e-05	5.68562e-05	0	0	1.26176e-05	0	0	0	0	0	0	0	0	0	0	0	0	0	0	0	0	0
	Bacteria	Armatimonadota	Chthonomonadetes	Chthonomonadales	NA	NA	ASV_ 10280	0	0	0	0	0	0	25	19	0	0	0	0	0	0	0	0	0	0	8.03595e-05	5.18586e-05	0	0	0	0	1.10182e-05	0	0	0	0	0	0	0	0	0	0	0	0	0	0	0	0	0
	Bacteria	Myxococcota	Polyangia	NA	NA	NA	ASV_ 10281	0	0	0	0	0	0	16	14	0	10	0	0	0	0	0	0	0	0	5.14301e-05	3.82116e-05	0	3.34448e-05	0	0	1.02572e-05	0	0	0	0	0	0	0	0	0	0	0	0	0	0	0	0	0
	Archaea	Crenarchaeota	Bathyarchaeia	NA	NA	NA	ASV_ 10282	0	0	0	0	0	0	0	0	17	0	0	27	0	0	0	0	0	0	0	0	5.40434e-05	0	0	7.2468e-05	1.05426e-05	0	0	0	0	0	0	0	0	0	0	0	0	0	0	0	0	0
	Bacteria	Desulfobacterota	Desulfuromonadia	Bradymonadales	NA	NA	ASV_ 10283	0	0	0	0	0	0	0	0	0	0	24	20	0	0	0	0	0	0	0	0	0	0	6.52495e-05	5.368e-05	9.91079e-06	0	0	0	0	0	0	0	0	0	0	0	0	0	0	0	0	0
	Bacteria	Desulfobacterota	Desulfuromonadia	Geobacterales	Geobacteraceae	Geobacter	ASV_ 10284	0	0	0	0	0	0	0	0	0	0	19	25	0	0	0	0	0	0	0	0	0	0	5.16558e-05	6.71e-05	9.89632e-06	0	0	0	0	0	0	0	0	0	0	0	0	0	0	0	0	0
	Bacteria	Planctomycetota	Phycisphaerae	MSBL9	SG8-4	NA	ASV_ 10285	0	0	0	0	0	0	0	0	0	0	0	0	0	0	0	0	0	0	0	0	0	0	0	0	0	0	0	0	0	0	0	0	0	0	0	0	0	0	0	0	0	0
	Bacteria	Desulfobacterota	Desulfobacteria	Desulfatiglandales	Desulfatiglandaceae	Desulfatiglans	ASV_ 10286	0	0	0	0	0	0	0	0	0	0	0	0	0	0	0	0	0	0	0	0	0	0	0	0	0	0	0	0	0	0	0	0	0	0	0	0	0	0	0	0	0	0
	Bacteria	Acidobacteriota	Aminicenantia	Aminicenantales	NA	NA	ASV_ 10287	0	0	0	0	0	0	0	0	0	0	0	0	0	0	0	0	0	0	0	0	0	0	0	0	0	0	0	0	0	0	0	0	0	0	0	0	0	0	0	0	0	0
	Bacteria	Sva0485	NA	NA	NA	NA	ASV_ 10288	0	0	0	0	0	0	0	0	0	0	0	0	0	0	0	0	0	0	0	0	0	0	0	0	0	0	0	0	0	0	0	0	0	0	0	0	0	0	0	0	0	0
	Bacteria	Planctomycetota	Planctomycetes	Pirellulales	Pirellulaceae	NA	ASV_ 10289	0	0	0	0	0	0	0	0	0	0	0	0	0	0	0	0	0	0	0	0	0	0	0	0	0	0	0	0	0	0	0	0	0	0	0	0	0	0	0	0	0	0
	Archaea	Hadarchaeota	Hadarchaeia	Hadarchaeales	NA	NA	ASV_ 10290	0	0	0	0	0	0	0	0	0	0	0	0	0	0	0	0	0	0	0	0	0	0	0	0	0	0	0	0	0	0	0	0	0	0	0	0	0	0	0	0	0	0
	Bacteria	Elusimicrobiota	Elusimicrobia	MVP-88	NA	NA	ASV_ 10291	0	0	0	0	0	0	0	0	0	0	0	0	0	0	0	0	0	0	0	0	0	0	0	0	0	0	0	0	0	0	0	0	0	0	0	0	0	0	0	0	0	0
	Bacteria	Chloroflexi	Anaerolineae	SBR1031	NA	NA	ASV_ 10292	0	0	0	0	0	0	0	0	0	0	0	0	0	0	0	0	0	0	0	0	0	0	0	0	0	0	0	0	0	0	0	0	0	0	0	0	0	0	0	0	0	0
	Bacteria	Chloroflexi	Dehalococcoidia	GIF9	NA	NA	ASV_ 10293	0	0	0	0	0	0	0	0	0	0	0	0	0	0	0	0	0	0	0	0	0	0	0	0	0	0	0	0	0	0	0	0	0	0	0	0	0	0	0	0	0	0
	Bacteria	Desulfobacterota	Desulfobaccia	Desulfobaccales	Desulfobaccaceae	Desulfobacca	ASV_ 10294	0	0	0	0	0	0	0	0	0	0	0	0	0	0	0	0	0	0	0	0	0	0	0	0	0	0	0	0	0	0	0	0	0	0	0	0	0	0	0	0	0	0
	Bacteria	Planctomycetota	Phycisphaerae	Phycisphaerales	AKAU3564 sediment group	NA	ASV_ 10295	0	0	0	0	0	0	0	0	0	0	0	0	0	0	0	0	0	0	0	0	0	0	0	0	0	0	0	0	0	0	0	0	0	0	0	0	0	0	0	0	0	0
	Archaea	Nanoarchaeota	Nanoarchaeia	Woesearchaeales	NA	NA	ASV_ 10296	0	0	0	0	0	0	0	0	0	0	0	0	0	0	0	0	0	0	0	0	0	0	0	0	0	0	0	0	0	0	0	0	0	0	0	0	0	0	0	0	0	0
	Bacteria	Calditrichota	Calditrichia	Calditrichales	Calditrichaceae	NA	ASV_ 10297	0	0	0	0	0	0	0	0	0	0	0	0	0	0	0	0	0	0	0	0	0	0	0	0	0	0	0	0	0	0	0	0	0	0	0	0	0	0	0	0	0	0
	Bacteria	Verrucomicrobiota	Omnitrophia	Omnitrophales	NA	NA	ASV_ 10298	0	0	0	0	0	0	0	0	0	0	0	0	0	0	0	0	0	0	0	0	0	0	0	0	0	0	0	0	0	0	0	0	0	0	0	0	0	0	0	0	0	0
	Bacteria	Acidobacteriota	Vicinamibacteria	Vicinamibacterales	Vicinamibacteraceae	Luteitalea	ASV_ 10299	0	0	0	0	0	0	0	0	0	0	0	0	0	0	0	0	0	0	0	0	0	0	0	0	0	0	0	0	0	0	0	0	0	0	0	0	0	0	0	0	0	0
	Bacteria	Chloroflexi	Anaerolineae	Anaerolineales	Anaerolineaceae	NA	ASV_ 1030	0	0	0	0	0	0	0	0	0	0	0	0	0	0	0	0	0	0	0	0	0	0	0	0	0	0	0	0	0	0	0	0	0	0	0	0	0	0	0	0	0	0
	Archaea	Nanoarchaeota	Nanoarchaeia	Woesearchaeales	GW2011_GWC1_47_15	NA	ASV_ 10300	0	0	0	0	0	0	0	0	0	0	0	0	0	0	0	0	0	0	0	0	0	0	0	0	0	0	0	0	0	0	0	0	0	0	0	0	0	0	0	0	0	0
	Bacteria	Chloroflexi	Dehalococcoidia	Napoli-4B-65	NA	NA	ASV_ 10301	0	0	0	0	0	0	0	0	0	0	0	0	0	0	0	0	0	0	0	0	0	0	0	0	0	0	0	0	0	0	0	0	0	0	0	0	0	0	0	0	0	0
	Bacteria	Firmicutes	Clostridia	Clostridiales	Clostridiaceae	Clostridium sensu stricto 1	ASV_ 10302	0	0	0	0	0	0	0	0	0	0	0	0	0	0	0	0	0	0	0	0	0	0	0	0	0	0	0	0	0	0	0	0	0	0	0	0	0	0	0	0	0	0
	Bacteria	Planctomycetota	Planctomycetes	Pirellulales	Pirellulaceae	Rhodopirellula	ASV_ 10303	0	0	0	0	0	0	0	0	0	0	0	0	0	0	0	0	0	0	0	0	0	0	0	0	0	0	0	0	0	0	0	0	0	0	0	0	0	0	0	0	0	0
	Bacteria	Chloroflexi	Dehalococcoidia	MSBL5	NA	NA	ASV_ 10304	0	0	0	0	0	0	0	0	0	0	0	0	0	0	0	0	0	0	0	0	0	0	0	0	0	0	0	0	0	0	0	0	0	0	0	0	0	0	0	0	0	0
	Bacteria	NA	NA	NA	NA	NA	ASV_ 10305	0	0	0	0	0	0	0	0	0	0	0	0	0	0	0	0	0	0	0	0	0	0	0	0	0	0	0	0	0	0	0	0	0	0	0	0	0	0	0	0	0	0
	Bacteria	Spirochaetota	Spirochaetia	Spirochaetales	Spirochaetaceae	Spirochaeta	ASV_ 10306	0	0	0	0	0	0	0	0	0	0	0	0	0	0	0	0	0	0	0	0	0	0	0	0	0	0	0	0	0	0	0	0	0	0	0	0	0	0	0	0	0	0
	Archaea	NA	NA	NA	NA	NA	ASV_ 10307	0	0	0	0	0	0	0	0	0	0	0	0	0	0	0	0	0	0	0	0	0	0	0	0	0	0	0	0	0	0	0	0	0	0	0	0	0	0	0	0	0	0
	Bacteria	Sumerlaeota	Sumerlaeia	NA	NA	NA	ASV_ 10308	0	0	0	0	0	0	0	0	0	0	0	0	0	0	0	0	0	0	0	0	0	0	0	0	0	0	0	0	0	0	0	0	0	0	0	0	0	0	0	0	0	0
	Bacteria	NKB15	NA	NA	NA	NA	ASV_ 10309	0	0	0	0	0	0	0	0	0	0	0	0	0	0	0	0	0	0	0	0	0	0	0	0	0	0	0	0	0	0	0	0	0	0	0	0	0	0	0	0	0	0
	Bacteria	Chloroflexi	Anaerolineae	Anaerolineales	Anaerolineaceae	NA	ASV_ 1031	0	0	0	0	0	0	9	0	0	0	0	0	0	0	0	0	0	0	2.89294e-05	0	0	0	0	0	2.41078e-06	0	0	0	0	0	0	0	0	0	0	0	0	0	0	0	0	0
	Bacteria	Desulfobacterota	Syntrophobacteria	Syntrophobacterales	NA	NA	ASV_ 10310	0	0	0	0	0	0	0	0	0	0	0	0	0	0	0	0	0	0	0	0	0	0	0	0	0	0	0	0	0	0	0	0	0	0	0	0	0	0	0	0	0	0
	Bacteria	Chloroflexi	Anaerolineae	Thermoflexales	Thermoflexaceae	Thermoflexus	ASV_ 10311	0	0	0	0	0	0	0	0	0	0	0	0	0	0	0	0	0	0	0	0	0	0	0	0	0	0	0	0	0	0	0	0	0	0	0	0	0	0	0	0	0	0
	Archaea	Aenigmarchaeota	Aenigmarchaeia	Aenigmarchaeales	NA	NA	ASV_ 10312	0	0	0	0	0	0	0	0	0	0	0	0	0	0	0	0	0	0	0	0	0	0	0	0	0	0	0	0	0	0	0	0	0	0	0	0	0	0	0	0	0	0
	Bacteria	Calditrichota	Calditrichia	Calditrichales	Calditrichaceae	NA	ASV_ 10313	0	0	0	0	0	0	0	0	0	0	0	0	0	0	0	0	0	0	0	0	0	0	0	0	0	0	0	0	0	0	0	0	0	0	0	0	0	0	0	0	0	0
	Bacteria	RCP2-54	NA	NA	NA	NA	ASV_ 10314	0	0	0	0	0	0	0	0	0	0	0	0	0	0	0	0	0	0	0	0	0	0	0	0	0	0	0	0	0	0	0	0	0	0	0	0	0	0	0	0	0	0
	Bacteria	Bacteroidota	Bacteroidia	Bacteroidales	SB-5	NA	ASV_ 10315	0	0	0	0	0	0	0	0	0	0	0	0	0	0	0	0	0	0	0	0	0	0	0	0	0	0	0	0	0	0	0	0	0	0	0	0	0	0	0	0	0	0
	Bacteria	Desulfobacterota	Syntrophobacteria	Syntrophobacterales	NA	NA	ASV_ 10316	0	0	0	0	0	0	0	0	0	0	0	0	0	0	0	0	0	0	0	0	0	0	0	0	0	0	0	0	0	0	0	0	0	0	0	0	0	0	0	0	0	0
	Bacteria	Patescibacteria	Microgenomatia	Candidatus Woesebacteria	NA	NA	ASV_ 10317	0	0	0	0	0	0	0	0	0	0	0	0	0	0	0	0	0	0	0	0	0	0	0	0	0	0	0	0	0	0	0	0	0	0	0	0	0	0	0	0	0	0
	Bacteria	NA	NA	NA	NA	NA	ASV_ 10318	0	0	0	0	0	0	0	0	0	0	0	0	0	0	0	0	0	0	0	0	0	0	0	0	0	0	0	0	0	0	0	0	0	0	0	0	0	0	0	0	0	0
	Archaea	Nanoarchaeota	Nanoarchaeia	Woesearchaeales	NA	NA	ASV_ 10319	0	0	0	0	0	0	0	0	0	0	0	0	0	0	0	0	0	0	0	0	0	0	0	0	0	0	0	0	0	0	0	0	0	0	0	0	0	0	0	0	0	0
	Bacteria	Proteobacteria	Gammaproteobacteria	Acidiferrobacterales	Acidiferrobacteraceae	Sulfurifustis	ASV_ 1032	0	0	0	0	0	0	0	0	0	0	0	0	0	0	0	0	0	0	0	0	0	0	0	0	0	0	0	0	0	0	0	0	0	0	0	0	0	0	0	0	0	0
	Bacteria	Chloroflexi	Anaerolineae	Anaerolineales	Anaerolineaceae	NA	ASV_ 10320	0	0	0	0	0	0	0	0	0	0	0	0	0	0	0	0	0	0	0	0	0	0	0	0	0	0	0	0	0	0	0	0	0	0	0	0	0	0	0	0	0	0
	Bacteria	Chloroflexi	Dehalococcoidia	vadinBA26	NA	NA	ASV_ 10321	0	0	0	0	0	0	0	0	0	0	0	0	0	0	0	0	0	0	0	0	0	0	0	0	0	0	0	0	0	0	0	0	0	0	0	0	0	0	0	0	0	0
	Bacteria	Sva0485	NA	NA	NA	NA	ASV_ 10322	0	0	0	0	0	0	0	0	0	0	0	0	0	0	0	0	0	0	0	0	0	0	0	0	0	0	0	0	0	0	0	0	0	0	0	0	0	0	0	0	0	0
	Bacteria	Planctomycetota	Planctomycetes	Pirellulales	Pirellulaceae	NA	ASV_ 10323	0	0	0	0	0	0	0	0	0	0	0	0	0	0	0	0	0	0	0	0	0	0	0	0	0	0	0	0	0	0	0	0	0	0	0	0	0	0	0	0	0	0
	Bacteria	Planctomycetota	Pla4 lineage	NA	NA	NA	ASV_ 10324	0	0	0	0	0	0	0	0	0	0	0	0	0	0	0	0	0	0	0	0	0	0	0	0	0	0	0	0	0	0	0	0	0	0	0	0	0	0	0	0	0	0
	Bacteria	Cyanobacteria	Cyanobacteria	Synechococcales	Cyanobiaceae	Cyanobium PCC-6307	ASV_ 10325	0	0	0	0	0	0	0	0	0	0	0	0	0	0	0	0	0	0	0	0	0	0	0	0	0	0	0	0	0	0	0	0	0	0	0	0	0	0	0	0	0	0
	Bacteria	Verrucomicrobiota	Verrucomicrobiae	Pedosphaerales	Pedosphaeraceae	NA	ASV_ 10326	0	0	0	0	0	0	0	0	0	0	0	0	0	0	0	0	0	0	0	0	0	0	0	0	0	0	0	0	0	0	0	0	0	0	0	0	0	0	0	0	0	0
	Bacteria	Myxococcota	Myxococcia	Myxococcales	Anaeromyxobacteraceae	Anaeromyxobacter	ASV_ 10327	0	0	0	0	0	0	0	0	0	0	0	0	0	0	0	0	0	0	0	0	0	0	0	0	0	0	0	0	0	0	0	0	0	0	0	0	0	0	0	0	0	0
	Bacteria	Chloroflexi	Anaerolineae	Anaerolineales	Anaerolineaceae	Anaerolinea	ASV_ 10328	0	0	0	0	0	0	0	0	0	0	0	0	0	0	0	0	0	0	0	0	0	0	0	0	0	0	0	0	0	0	0	0	0	0	0	0	0	0	0	0	0	0
	Bacteria	Myxococcota	Polyangia	Blfdi19	NA	NA	ASV_ 10329	0	0	0	0	0	0	0	0	0	0	0	0	0	0	0	0	0	0	0	0	0	0	0	0	0	0	0	0	0	0	0	0	0	0	0	0	0	0	0	0	0	0
	Bacteria	Acidobacteriota	Subgroup 18	NA	NA	NA	ASV_ 10330	0	0	0	0	0	0	0	0	0	0	0	0	0	0	0	0	0	0	0	0	0	0	0	0	0	0	0	0	0	0	0	0	0	0	0	0	0	0	0	0	0	0
	Bacteria	Verrucomicrobiota	Omnitrophia	Omnitrophales	Omnitrophaceae	Candidatus Omnitrophus	ASV_ 10331	0	0	0	0	0	0	0	0	0	0	0	0	0	0	0	0	0	0	0	0	0	0	0	0	0	0	0	0	0	0	0	0	0	0	0	0	0	0	0	0	0	0
	Archaea	Crenarchaeota	Bathyarchaeia	NA	NA	NA	ASV_ 10332	0	0	0	0	0	0	0	0	0	0	0	0	0	0	0	0	0	0	0	0	0	0	0	0	0	0	0	0	0	0	0	0	0	0	0	0	0	0	0	0	0	0
	Bacteria	Chloroflexi	Anaerolineae	SBR1031	A4b	NA	ASV_ 10333	0	0	0	0	0	0	0	0	0	0	0	0	0	0	0	0	0	0	0	0	0	0	0	0	0	0	0	0	0	0	0	0	0	0	0	0	0	0	0	0	0	0
	Bacteria	Acidobacteriota	Blastocatellia	2024-11-01	NA	NA	ASV_ 10334	0	0	0	0	0	0	0	0	0	0	0	0	0	0	0	0	0	0	0	0	0	0	0	0	0	0	0	0	0	0	0	0	0	0	0	0	0	0	0	0	0	0
	Bacteria	Proteobacteria	Gammaproteobacteria	Burkholderiales	Methylophilaceae	Methylotenera	ASV_ 10335	0	0	0	0	0	0	0	0	0	0	0	0	0	0	0	0	0	0	0	0	0	0	0	0	0	0	0	0	0	0	0	0	0	0	0	0	0	0	0	0	0	0
	Bacteria	Bacteroidota	Ignavibacteria	SJA-28	NA	NA	ASV_ 10336	0	0	0	0	0	0	0	0	0	0	0	0	0	0	0	0	0	0	0	0	0	0	0	0	0	0	0	0	0	0	0	0	0	0	0	0	0	0	0	0	0	0
	Bacteria	Acidobacteriota	Aminicenantia	Aminicenantales	NA	NA	ASV_ 10337	0	0	0	0	0	0	0	0	0	0	0	0	0	0	0	0	0	0	0	0	0	0	0	0	0	0	0	0	0	0	0	0	0	0	0	0	0	0	0	0	0	0
	Bacteria	Chloroflexi	Dehalococcoidia	GIF9	NA	NA	ASV_ 10338	0	0	0	0	0	0	0	0	0	0	0	0	0	0	0	0	0	0	0	0	0	0	0	0	0	0	0	0	0	0	0	0	0	0	0	0	0	0	0	0	0	0
	Bacteria	Planctomycetota	Pla4 lineage	NA	NA	NA	ASV_ 10339	0	0	0	0	0	0	0	0	0	0	0	0	0	0	0	0	0	0	0	0	0	0	0	0	0	0	0	0	0	0	0	0	0	0	0	0	0	0	0	0	0	0
	Bacteria	Chloroflexi	Anaerolineae	SBR1031	NA	NA	ASV_ 1034	0	0	0	0	0	0	0	0	0	0	0	0	0	0	0	0	0	0	0	0	0	0	0	0	0	0	0	0	0	0	0	0	0	0	0	0	0	0	0	0	0	0
	Bacteria	Dadabacteria	Dadabacteriia	Dadabacteriales	NA	NA	ASV_ 10340	0	0	0	0	0	0	0	0	0	0	0	0	0	0	0	0	0	0	0	0	0	0	0	0	0	0	0	0	0	0	0	0	0	0	0	0	0	0	0	0	0	0
	Archaea	Crenarchaeota	Bathyarchaeia	NA	NA	NA	ASV_ 10341	0	0	0	0	0	0	0	0	0	0	0	0	0	0	0	0	0	0	0	0	0	0	0	0	0	0	0	0	0	0	0	0	0	0	0	0	0	0	0	0	0	0
	Bacteria	Elusimicrobiota	Lineage IIb	NA	NA	NA	ASV_ 10342	0	0	0	0	0	0	0	0	0	0	0	0	0	0	0	0	0	0	0	0	0	0	0	0	0	0	0	0	0	0	0	0	0	0	0	0	0	0	0	0	0	0
	Bacteria	Chloroflexi	Anaerolineae	NA	NA	NA	ASV_ 10343	0	0	0	0	0	0	0	0	0	0	0	0	0	0	0	0	0	0	0	0	0	0	0	0	0	0	0	0	0	0	0	0	0	0	0	0	0	0	0	0	0	0
	Bacteria	Chloroflexi	Anaerolineae	SBR1031	A4b	NA	ASV_ 10344	0	0	0	0	0	0	0	0	0	0	0	0	0	0	0	0	0	0	0	0	0	0	0	0	0	0	0	0	0	0	0	0	0	0	0	0	0	0	0	0	0	0
	Bacteria	Bacteroidota	Bacteroidia	Cytophagales	Flammeovirgaceae	NA	ASV_ 10345	0	0	0	0	0	0	0	0	0	0	0	0	0	0	0	0	0	0	0	0	0	0	0	0	0	0	0	0	0	0	0	0	0	0	0	0	0	0	0	0	0	0
	Bacteria	Bdellovibrionota	Oligoflexia	0319-6G20	NA	NA	ASV_ 10346	0	0	0	0	0	0	0	0	0	0	0	0	0	0	0	0	0	0	0	0	0	0	0	0	0	0	0	0	0	0	0	0	0	0	0	0	0	0	0	0	0	0
	Archaea	Crenarchaeota	Bathyarchaeia	NA	NA	NA	ASV_ 10347	0	0	0	0	0	0	0	0	0	0	0	0	0	0	0	0	0	0	0	0	0	0	0	0	0	0	0	0	0	0	0	0	0	0	0	0	0	0	0	0	0	0
	Bacteria	Proteobacteria	Alphaproteobacteria	NA	NA	NA	ASV_ 10348	0	0	0	0	0	0	0	0	0	0	0	0	0	0	0	0	0	0	0	0	0	0	0	0	0	0	0	0	0	0	0	0	0	0	0	0	0	0	0	0	0	0
	Bacteria	Acidobacteriota	Subgroup 18	NA	NA	NA	ASV_ 10349	0	0	0	0	0	0	0	0	0	0	0	0	0	0	0	0	0	0	0	0	0	0	0	0	0	0	0	0	0	0	0	0	0	0	0	0	0	0	0	0	0	0
	Bacteria	Chloroflexi	Chloroflexia	Chloroflexales	Chloroflexaceae	NA	ASV_ 1035	0	0	0	0	0	0	0	0	0	0	0	0	0	0	0	0	0	0	0	0	0	0	0	0	0	0	0	0	0	0	0	0	0	0	0	0	0	0	0	0	0	0
	Bacteria	Proteobacteria	Gammaproteobacteria	Burkholderiales	Sutterellaceae	Sutterella	ASV_ 10350	0	0	0	0	0	0	0	0	0	0	0	0	0	0	0	0	0	0	0	0	0	0	0	0	0	0	0	0	0	0	0	0	0	0	0	0	0	0	0	0	0	0
	Bacteria	Firmicutes	Negativicutes	Acidaminococcales	Acidaminococcaceae	Acidaminococcus	ASV_ 10351	0	0	0	0	0	0	0	0	0	0	0	0	0	0	0	0	0	0	0	0	0	0	0	0	0	0	0	0	0	0	0	0	0	0	0	0	0	0	0	0	0	0
	Bacteria	Chloroflexi	Anaerolineae	Anaerolineales	Anaerolineaceae	NA	ASV_ 10352	0	0	0	0	0	0	0	0	0	0	0	0	0	0	0	0	0	0	0	0	0	0	0	0	0	0	0	0	0	0	0	0	0	0	0	0	0	0	0	0	0	0
	Bacteria	Latescibacterota	Latescibacteria	Latescibacterales	Latescibacteraceae	NA	ASV_ 10353	0	0	0	0	0	0	0	0	0	0	0	0	0	0	0	0	0	0	0	0	0	0	0	0	0	0	0	0	0	0	0	0	0	0	0	0	0	0	0	0	0	0
[truncated: 22,299 more rows]
[truncated: 9 more columns]

## Sheet: Phyla >0.01%
	dada2							raw reads												Sum of raw reads based on Phyla													Relative abundance
[truncated: 1,445 more rows]

[truncated: 1 more sheets: Cyanobacteria >0.01%]
